# Supplementary material
Source: publisher figshare collection journal article supplement (https://gsapubs.figshare.com/ndownloader/files/23030852)
Supplement: Supplementary file 1 [file 23030852]

## Sheet: Table S1
TABLE S1: LA-ICPMS analyses of pyrite used in this study (for further location detalis see supplementary Tables in Large et al., 2014, 2015a and b)
	Location	Age Ma	Mn_Py	Co_Py	Ni_Py	Cu_Py	Zn_Py	As_Py	Se_Py	Mo_Py	Age Ma	Ag_Py	Cd_Py	Sb_Py	Te_Py	Pt_Py	Au_Py	Tl_Py	206Pb_Py	207Pb_Py	208Pb_Py	Bi_Py	Geochronology details & reference	comments	comments	Areas	BoxID	Location	Country	Supergroup/ Group	Formation	Member/ Unit	Description		Age (Ma)	207/206Pb
CB-6	Cariaco basin	0.1	2656.1	10.2432	363.685	810.882	682.846	137.449	48.4278	1042.64	0.1	20.9467	12.9038	36.189	2.4395	0.2965	0.135	51.9964	79.9253	67.1479	75.6866	2.76973	modern sediments (developed at 14.5 ka BP)				A4-	Cariaco Basin, Site 1002 Leg 165	Venezuela	-	-	-	unconsolidated black organic-rich sediment with 3% framboidal pyrite
CB-6	Cariaco basin	0.1	2479.28	21.0457	626.84	977.252	489.133	195.276	65.7773	1201.27	0.1	23.6838	20.2749	51.9623	2.4675	0.2965	0.135	85.4749	195.927	171.623	180.717	6.93103	3195	204	115	1053	2772	3187	3216	3048	3066	2721	3114	0	1	1006
CB-6	Cariaco basin	0.1	2313.12	5.40883	158.546	611.033	617.122	131.321	129.321	2028.67	0.1	17.069	24.2512	29.0619	1.89043	0.2965	0.2	43.0075	68.1538	52.4384	57.044	2.7489	modern sediments (developed at 14.5 ka BP)				A4-	Cariaco Basin, Site 1002 Leg 165	Venezuela	-	-	-	unconsolidated black organic-rich sediment with 3% framboidal pyrite
CB-6	Cariaco basin	0.1	1883.99	26.6505	439.456	1007.77	914.454	293.634	204.037	1772.66	0.1	29.9801	36.1161	47.6591	3.34818	0.2965	0.059	79.0848	149.727	130.582	136.061	4.95644	modern sediments (developed at 14.5 ka BP)				A4-	Cariaco Basin, Site 1002 Leg 165	Venezuela	-	-	-	unconsolidated black organic-rich sediment with 3% framboidal pyrite
CB5	Cariaco basin	0.1	1252.83	35.697	477.93	292.207	431.2	362.927	21.0373	742.832	0.1	6.16107	17.5012	93.0484	1.9826	0.09138	0.489344	26.658	24.1049	16.9176	18.1044	1.87408	modern sediments (developed at 14.5 ka BP)				A4-	Cariaco Basin, Site 1002 Leg 165	Venezuela	-	-	-	unconsolidated black organic-rich sediment with 3% framboidal pyrite
CB5	Cariaco basin	0.1	3540.71	6.64724	114.724	293.953	712.051	207.736	34.0037	1490.73	0.1	5.48176	6.41825	44.2569	3.41655	0.38996	0.33529	11.0976	31.0065	29.5806	28.9791	1.39571	modern sediments (developed at 14.5 ka BP)				A4-	Cariaco Basin, Site 1002 Leg 165	Venezuela	-	-	-	unconsolidated black organic-rich sediment with 3% framboidal pyrite
CB5	Cariaco basin	0.1	1639.18	93.129	976.315	565.794	1070.62	189.213	43.1886	740.22	0.1	6.80139	31.6099	61.6608	3.8422	0.6323	0.2667	12.0323	98.8648	88.0212	91.7673	2.84731	modern sediments (developed at 14.5 ka BP)				A4-	Cariaco Basin, Site 1002 Leg 165	Venezuela	-	-	-	unconsolidated black organic-rich sediment with 3% framboidal pyrite
CB5	Cariaco basin	0.1	5261.47	7.09144	75.3186	479.027	551.484	289.348	49.1114	960.292	0.1	14.4244	40.0455	123.626	1.2645	0.15544	0.084135	12.4149	15.1688	10.1281	12.82	1.99918	modern sediments (developed at 14.5 ka BP)				A4-	Cariaco Basin, Site 1002 Leg 165	Venezuela	-	-	-	unconsolidated black organic-rich sediment with 3% framboidal pyrite
CB5	Cariaco basin	0.1	4181.42	21.8837	172.903	583.936	1054.9	70.9676	51.5836	679.679	0.1	7.72399	14.7799	57.7231	9.43055	0.361625	0.710408	16.7866	109.135	100.841	116.524	2.22064	modern sediments (developed at 14.5 ka BP)				A4-	Cariaco Basin, Site 1002 Leg 165	Venezuela	-	-	-	unconsolidated black organic-rich sediment with 3% framboidal pyrite
CB5	Cariaco basin	0.1	3595.59	36.9323	547.459	495.268	866.276	559.271	70.7269	1358.84	0.1	8.55235	35.7148	169.813	8.59339	0.093075	0.067615	13.7432	72.0421	58.0451	62.8018	2.63338	modern sediments (developed at 14.5 ka BP)				A4-	Cariaco Basin, Site 1002 Leg 165	Venezuela	-	-	-	unconsolidated black organic-rich sediment with 3% framboidal pyrite
CB5	Cariaco basin	0.1	3687.37	5.79554	92.2883	344.726	734.019	534.961	77.6952	1412.46	0.1	10.758	50.8039	172.942	4.97528	0.18258	0.068455	14.5973	34.5426	27.5807	33.6904	0.924679	modern sediments (developed at 14.5 ka BP)				A4-	Cariaco Basin, Site 1002 Leg 165	Venezuela	-	-	-	unconsolidated black organic-rich sediment with 3% framboidal pyrite
CB5	Cariaco basin	0.1	3545.94	14.1579	383.926	573.697	852.591	289.043	135.108	1112.01	0.1	11.2703	35.3207	113.504	5.14804	0.124535	0.08415	21.8827	56.0282	46.0424	45.667	2.37549	modern sediments (developed at 14.5 ka BP)				A4-	Cariaco Basin, Site 1002 Leg 165	Venezuela	-	-	-	unconsolidated black organic-rich sediment with 3% framboidal pyrite
CB5	Cariaco basin	0.1	4119.94	58.3406	443.661	383.69	780.148	317.39	152.486	1200.61	0.1	3.01493	39.5657	129.75	3.3135	0.318985	0.234975	7.3071	3.7152	3.39575	2.79385	0.660986	modern sediments (developed at 14.5 ka BP)				A4-	Cariaco Basin, Site 1002 Leg 165	Venezuela	-	-	-	unconsolidated black organic-rich sediment with 3% framboidal pyrite
CB5	Cariaco basin	0.1	3131.44	12.5903	318.098	744.909	761.772	375.852	205.784	1243.5	0.1	16.6244	25.1301	114.578	3.5359	0.1172	0.08697	17.4304	41.2815	33.1117	38.9487	2.98326	modern sediments (developed at 14.5 ka BP)				A4-	Cariaco Basin, Site 1002 Leg 165	Venezuela	-	-	-	unconsolidated black organic-rich sediment with 3% framboidal pyrite
CB5	Cariaco basin	0.1	1187.28	39.7243	559.684	437.518	391.631	466.027	255.122	924.835	0.1	7.11583	31.5353	96.096	1.65935	0.21563	0.14977	12.9556	30.819	25.9182	28.4459	1.78994	modern sediments (developed at 14.5 ka BP)				A4-	Cariaco Basin, Site 1002 Leg 165	Venezuela	-	-	-	unconsolidated black organic-rich sediment with 3% framboidal pyrite
CB5	Cariaco basin	0.1	1963.66	39.1659	142.826	76.7995	982.258	95.1422	276.959	417.836	0.1	2.60912	8.1281	15.1932	3.6747	0.469015	0.10536	47.2256	23.0691	13.508	11.4893	0.52295	modern sediments (developed at 14.5 ka BP)				A4-	Cariaco Basin, Site 1002 Leg 165	Venezuela	-	-	-	unconsolidated black organic-rich sediment with 3% framboidal pyrite
CB5	Cariaco basin	0.1	720.644	125.891	289.423	153.886	453.166	336.314	277.029	364.889	0.1	3.05808	14.144	25.9094	10.4725	0.433845	0.27043	26.5758	37.7443	29.4072	26.9229	0.240368	modern sediments (developed at 14.5 ka BP)				A4-	Cariaco Basin, Site 1002 Leg 165	Venezuela	-	-	-	unconsolidated black organic-rich sediment with 3% framboidal pyrite
CB5	Cariaco basin	0.1	729.747	80.8062	465.806	264.79	371.819	541.385	309.572	655.901	0.1	5.55107	10.8977	63.0731	5.84158	0.22023	0.095595	20.6738	126.11	52.4574	35.3237	1.91114	modern sediments (developed at 14.5 ka BP)				A4-	Cariaco Basin, Site 1002 Leg 165	Venezuela	-	-	-	unconsolidated black organic-rich sediment with 3% framboidal pyrite
CB5	Cariaco basin	0.1	707.747	96.0816	433.432	265.668	295.22	491.898	389.033	507.352	0.1	5.91047	24.8215	85.6486	0.7764	0.100465	0.17116	16.0669	28.0512	28.1487	30.0884	0.29733	modern sediments (developed at 14.5 ka BP)				A4-	Cariaco Basin, Site 1002 Leg 165	Venezuela	-	-	-	unconsolidated black organic-rich sediment with 3% framboidal pyrite
CB5	Cariaco basin	0.1	878.965	233.783	627.223	637.644	403.326	518.69	600.001	869.25	0.1	11.7038	24.7736	97.242	2.16222	0.093125	0.1994	21.2155	88.924	92.9203	87.2072	4.18082	modern sediments (developed at 14.5 ka BP)				A4-	Cariaco Basin, Site 1002 Leg 165	Venezuela	-	-	-	unconsolidated black organic-rich sediment with 3% framboidal pyrite
CB7	Cariaco basin	0.1	2132.99	43.6488	875.801	560.919	790.167	220.206	32.2688	980.635	0.1	7.55197	13.5894	21.0381	1.06105	0.10319	0.123015	47.2016	116.836	106.579	105.448	2.8789	modern sediments (developed at 14.5 ka BP)				A4-	Cariaco Basin, Site 1002 Leg 165	Venezuela	-	-	-	unconsolidated black organic-rich sediment with 3% framboidal pyrite
CB7	Cariaco basin	0.1	1791.45	84.4351	792.145	803.7	818.192	212.66	42.7317	474.283	0.1	2.77424	8.88961	14.4934	4.81632	0.468285	0.09692	22.5319	117.236	99.387	90.4628	3.77512	modern sediments (developed at 14.5 ka BP)				A4-	Cariaco Basin, Site 1002 Leg 165	Venezuela	-	-	-	unconsolidated black organic-rich sediment with 3% framboidal pyrite
CB7	Cariaco basin	0.1	2425.88	53.5134	618.3	360.561	549.123	74.2463	81.4998	751.908	0.1	4.73239	2.40065	5.36069	1.94485	0.209147	0.133736	23.5714	130.438	79.3968	94.1156	1.25491	modern sediments (developed at 14.5 ka BP)				A4-	Cariaco Basin, Site 1002 Leg 165	Venezuela	-	-	-	unconsolidated black organic-rich sediment with 3% framboidal pyrite
CB7	Cariaco basin	0.1	2720.96	10.742	502.838	1573.7	505.147	313.608	87.9845	1429.34	0.1	32.8149	3.87025	33.3589	7.28257	0.258855	0.132315	48.171	152.825	139.051	143.767	6.15883	modern sediments (developed at 14.5 ka BP)				A4-	Cariaco Basin, Site 1002 Leg 165	Venezuela	-	-	-	unconsolidated black organic-rich sediment with 3% framboidal pyrite
CB7	Cariaco basin	0.1	1992	36.4682	685.311	328.913	649.665	141.909	95.9077	678.757	0.1	6.1651	3.92461	9.38644	1.62175	0.07384	0.047486	29.4694	36.8849	26.4317	31.1035	2.06173	modern sediments (developed at 14.5 ka BP)				A4-	Cariaco Basin, Site 1002 Leg 165	Venezuela	-	-	-	unconsolidated black organic-rich sediment with 3% framboidal pyrite
CB7	Cariaco basin	0.1	116.136	5.39433	157.899	406.376	189.932	1954.27	108.896	387.678	0.1	12.6691	11.6821	22.6556	0.26547	0.036852	0.021529	15.7348	19.5595	15.365	17.8915	1.28485	modern sediments (developed at 14.5 ka BP)				A4-	Cariaco Basin, Site 1002 Leg 165	Venezuela	-	-	-	unconsolidated black organic-rich sediment with 3% framboidal pyrite
CB7	Cariaco basin	0.1	2107.53	37.498	509.752	840.577	551.011	175.07	116.126	717.824	0.1	10.205	6.40443	10.7886	2.45506	0.45101	0.235015	18.6918	125.527	105.419	111.469	2.83927	modern sediments (developed at 14.5 ka BP)				A4-	Cariaco Basin, Site 1002 Leg 165	Venezuela	-	-	-	unconsolidated black organic-rich sediment with 3% framboidal pyrite
CB7	Cariaco basin	0.1	1524.6	67.1004	1131.93	689.34	821.471	215.777	144.436	958.53	0.1	13.2271	7.44494	22.2929	2.0296	0.34845	0.107025	38.9669	212.64	179.971	187.025	3.56749	modern sediments (developed at 14.5 ka BP)				A4-	Cariaco Basin, Site 1002 Leg 165	Venezuela	-	-	-	unconsolidated black organic-rich sediment with 3% framboidal pyrite
CB7	Cariaco basin	0.1	2069.9	52.8178	946.66	1014.16	711.182	102.879	161.24	1074.9	0.1	28.5498	15.6396	29.4679	1.25485	0.073675	0.108145	42.8401	160.458	146.488	153.742	4.22352	modern sediments (developed at 14.5 ka BP)				A4-	Cariaco Basin, Site 1002 Leg 165	Venezuela	-	-	-	unconsolidated black organic-rich sediment with 3% framboidal pyrite
CB7	Cariaco basin	0.1	1881.94	290.522	1020.55	602.221	486.702	387.931	191.438	508.269	0.1	2.07473	12.204	92.8507	3.00385	0.460005	0.142785	19.0894	134.092	102.511	123.028	2.83196	modern sediments (developed at 14.5 ka BP)				A4-	Cariaco Basin, Site 1002 Leg 165	Venezuela	-	-	-	unconsolidated black organic-rich sediment with 3% framboidal pyrite
CB7	Cariaco basin	0.1	2946.52	23.0128	312.407	1513.73	523.553	191.09	198.652	4064.19	0.1	19.5024	9.82145	36.0447	2.71197	0.07354	0.139481	73.1462	200.393	182.757	192.26	4.73261	modern sediments (developed at 14.5 ka BP)				A4-	Cariaco Basin, Site 1002 Leg 165	Venezuela	-	-	-	unconsolidated black organic-rich sediment with 3% framboidal pyrite
CB7	Cariaco basin	0.1	3211.01	48.1291	482.234	883.649	506.492	99.3452	219.944	1425.47	0.1	8.11426	29.0929	21.6028	3.4523	0.281105	0.080215	18.6641	156.113	124.285	146.396	1.69323	modern sediments (developed at 14.5 ka BP)				A4-	Cariaco Basin, Site 1002 Leg 165	Venezuela	-	-	-	unconsolidated black organic-rich sediment with 3% framboidal pyrite
CB7	Cariaco basin	0.1	1237.96	118.842	661.37	1411.9	319.786	226.675	330.046	1082.56	0.1	29.6949	29.9413	31.9152	4.3448	0.393271	0.421385	61.5354	70.948	54.2925	69.8175	2.76291	modern sediments (developed at 14.5 ka BP)				A4-	Cariaco Basin, Site 1002 Leg 165	Venezuela	-	-	-	unconsolidated black organic-rich sediment with 3% framboidal pyrite
CB7	Cariaco basin	0.1	2975.28	263.147	672.592	643.428	469.989	181.259	368.41	823.744	0.1	12.2353	3.46035	24.9954	5.87095	1.071	0.30087	47.3877	52.6476	51.2761	52.4656	0.5179	modern sediments (developed at 14.5 ka BP)				A4-	Cariaco Basin, Site 1002 Leg 165	Venezuela	-	-	-	unconsolidated black organic-rich sediment with 3% framboidal pyrite
LR-302-4A-27-1/126	OIDP302, Arctic Ocean	53	1050.31	47.7499	39.3713	322.293	182.431	123.385	42.7694	263.68	53	1.18129	7.73104	13.772	0.4975	0.032	0.0375	1.61693	51.7751	41.0315	45.3478	0.838905	Stein, R., Boucsein, B., Meyer, H., 2006. Anoxia and high primary production in the Paleogene central Arctic Ocean: First detailed records from Lomonosov Ridge. Geophysical Research Letters 33. Schoon et al., 2013, Recognition of Early Eocene global carbon isotope excursions using lipids of marine Thaumarchaeota. The Paleocene–Eocene Thermal Maximum (PETM; ∼56 Ma) and EoceneThermal Maximum2(ETM2;…				K1-	Lomonosov Ridge, IODP Exp 302 (ACEX)	central Arctic Ocean	-	-	Unit 3	Gray, very dark gray, and olive-gray, firm to very firm clay and silty clay. Submillimeter-scale laminations are present in much of the unit. Millimeter- to centimeter-scale pyrite concretions and slight bioturbation are common (Backman, J., Moran, K., McInroy, D.B., Mayer, L.A., and the Expedition 302 Scientists Proceedings of the Integrated Ocean Drilling Program, Volume 302)
LR-302-4A-27-1/126	OIDP302, Arctic Ocean	53	947.269	91.1606	111.595	376.333	273.799	246.893	73.3764	646.224	53	1.26353	5.41868	30.6619	4.44438	0.032	0.08	2.981	80.3479	74.2649	76.8878	1.27073	Stein, R., Boucsein, B., Meyer, H., 2006. Anoxia and high primary production in the Paleogene central Arctic Ocean: First detailed records from Lomonosov Ridge. Geophysical Research Letters 33. Schoon et al., 2013, Recognition of Early Eocene global carbon isotope excursions using lipids of marine Thaumarchaeota. The Paleocene–Eocene Thermal Maximum (PETM; ∼56 Ma) and EoceneThermal Maximum2(ETM2;…				K1-	Lomonosov Ridge, IODP Exp 302 (ACEX)	central Arctic Ocean	-	-	Unit 3	Gray, very dark gray, and olive-gray, firm to very firm clay and silty clay. Submillimeter-scale laminations are present in much of the unit. Millimeter- to centimeter-scale pyrite concretions and slight bioturbation are common (Backman, J., Moran, K., McInroy, D.B., Mayer, L.A., and the Expedition 302 Scientists Proceedings of the Integrated Ocean Drilling Program, Volume 302)
LR-302-4A-27-1/126	OIDP302, Arctic Ocean	53	1246.81	159.898	73.4764	286.466	214.89	153.04	75.1926	379.684	53	1.24322	10.4677	18.6481	2.87813	0.032	0.048	14.9343	64.8461	47.8635	46.0506	1.49236
LR-302-4A-27-1/126	OIDP302, Arctic Ocean	53	1191.87	115.543	74.0961	317.069	250.342	160.328	110.291	586.06	53	1.39045	12.9883	18.1899	2.8857	0.032	0.04	2.86131	59.0779	55.0676	59.4242	1.8002	Stein, R., Boucsein, B., Meyer, H., 2006. Anoxia and high primary production in the Paleogene central Arctic Ocean: First detailed records from Lomonosov Ridge. Geophysical Research Letters 33. Schoon et al., 2013, Recognition of Early Eocene global carbon isotope excursions using lipids of marine Thaumarchaeota. The Paleocene–Eocene Thermal Maximum (PETM; ∼56 Ma) and EoceneThermal Maximum2(ETM2;…				K1-	Lomonosov Ridge, IODP Exp 302 (ACEX)	central Arctic Ocean	-	-	Unit 3	Gray, very dark gray, and olive-gray, firm to very firm clay and silty clay. Submillimeter-scale laminations are present in much of the unit. Millimeter- to centimeter-scale pyrite concretions and slight bioturbation are common (Backman, J., Moran, K., McInroy, D.B., Mayer, L.A., and the Expedition 302 Scientists Proceedings of the Integrated Ocean Drilling Program, Volume 302)
LR-302-4A-27-1/126	OIDP302, Arctic Ocean	53	942.112	91.9281	115.356	246.332	512.154	220.758	119.365	761.709	53	1.40499	22.672	26.3822	2.64666	0.032	0.0645	3.5057	89.5981	82.5306	84.8447	2.24558	Stein, R., Boucsein, B., Meyer, H., 2006. Anoxia and high primary production in the Paleogene central Arctic Ocean: First detailed records from Lomonosov Ridge. Geophysical Research Letters 33. Schoon et al., 2013, Recognition of Early Eocene global carbon isotope excursions using lipids of marine Thaumarchaeota. The Paleocene–Eocene Thermal Maximum (PETM; ∼56 Ma) and EoceneThermal Maximum2(ETM2;…				K1-	Lomonosov Ridge, IODP Exp 302 (ACEX)	central Arctic Ocean	-	-	Unit 3	Gray, very dark gray, and olive-gray, firm to very firm clay and silty clay. Submillimeter-scale laminations are present in much of the unit. Millimeter- to centimeter-scale pyrite concretions and slight bioturbation are common (Backman, J., Moran, K., McInroy, D.B., Mayer, L.A., and the Expedition 302 Scientists Proceedings of the Integrated Ocean Drilling Program, Volume 302)
LR-302-4A-27-1/126	OIDP302, Arctic Ocean	53	1762.05	192.234	276.946	233.408	1007.5	312.62	192.076	1141.3	53	1.01917	32.6118	32.1895	22.234	0.032	0.081	3.81499	123.888	111.96	98.8123	7.76524	modern sediments (developed at 14.5 ka BP)				A4-	Cariaco Basin, Site 1002 Leg 165	Venezuela	-	-	-	unconsolidated black organic-rich sediment with 3% framboidal pyrite
LR-302-4A-27-1/146	OIDP302, Arctic Ocean	53	97.643	50.1551	16.1073	161.69	366.707	350.733	6.25111	16.5412	53	1.19789	0.819935	0.514062	0.876206	0.032	0.027	1.97368	12.8813	11.5774	12.4717	0.172276	Stein, R., Boucsein, B., Meyer, H., 2006. Anoxia and high primary production in the Paleogene central Arctic Ocean: First detailed records from Lomonosov Ridge. Geophysical Research Letters 33. Schoon et al., 2013, Recognition of Early Eocene global carbon isotope excursions using lipids of marine Thaumarchaeota. The Paleocene–Eocene Thermal Maximum (PETM; ∼56 Ma) and EoceneThermal Maximum2(ETM2;…				K1-	Lomonosov Ridge, IODP Exp 302 (ACEX)	central Arctic Ocean	-	-	Unit 3	Gray, very dark gray, and olive-gray, firm to very firm clay and silty clay. Submillimeter-scale laminations are present in much of the unit. Millimeter- to centimeter-scale pyrite concretions and slight bioturbation are common (Backman, J., Moran, K., McInroy, D.B., Mayer, L.A., and the Expedition 302 Scientists Proceedings of the Integrated Ocean Drilling Program, Volume 302)
LR-302-4A-27-1/146	OIDP302, Arctic Ocean	53	296.621	767.534	125.817	51.388	87.379	927.331	10.0342	47.3896	53	0.364421	1.35781	1.72553	0.403897	0.032	0.00453871	0.847601	18.273	16.6796	20.401	0.213694	Stein, R., Boucsein, B., Meyer, H., 2006. Anoxia and high primary production in the Paleogene central Arctic Ocean: First detailed records from Lomonosov Ridge. Geophysical Research Letters 33. Schoon et al., 2013, Recognition of Early Eocene global carbon isotope excursions using lipids of marine Thaumarchaeota. The Paleocene–Eocene Thermal Maximum (PETM; ∼56 Ma) and EoceneThermal Maximum2(ETM2;…				K1-	Lomonosov Ridge, IODP Exp 302 (ACEX)	central Arctic Ocean	-	-	Unit 3	Gray, very dark gray, and olive-gray, firm to very firm clay and silty clay. Submillimeter-scale laminations are present in much of the unit. Millimeter- to centimeter-scale pyrite concretions and slight bioturbation are common (Backman, J., Moran, K., McInroy, D.B., Mayer, L.A., and the Expedition 302 Scientists Proceedings of the Integrated Ocean Drilling Program, Volume 302)
LR-302-4A-27-1/146	OIDP302, Arctic Ocean	53	278.213	424.959	234.848	76.5745	153.936	453.619	12.6978	79.7385	53	0.500164	1.04341	0.851577	0.3505	0.032	0.0265	0.709479	20.2279	18.6324	21.1373	0.137181	Stein, R., Boucsein, B., Meyer, H., 2006. Anoxia and high primary production in the Paleogene central Arctic Ocean: First detailed records from Lomonosov Ridge. Geophysical Research Letters 33. Schoon et al., 2013, Recognition of Early Eocene global carbon isotope excursions using lipids of marine Thaumarchaeota. The Paleocene–Eocene Thermal Maximum (PETM; ∼56 Ma) and EoceneThermal Maximum2(ETM2;…				K1-	Lomonosov Ridge, IODP Exp 302 (ACEX)	central Arctic Ocean	-	-	Unit 3	Gray, very dark gray, and olive-gray, firm to very firm clay and silty clay. Submillimeter-scale laminations are present in much of the unit. Millimeter- to centimeter-scale pyrite concretions and slight bioturbation are common (Backman, J., Moran, K., McInroy, D.B., Mayer, L.A., and the Expedition 302 Scientists Proceedings of the Integrated Ocean Drilling Program, Volume 302)
LR-302-4A-27-1/146	OIDP302, Arctic Ocean	53	229.974	178.905	126.879	266.195	134.327	255.506	23.1229	63.8386	53	3.00973	0.2705	1.75207	0.745549	0.032	0.0275	4.30644	71.2388	66.6778	67.9433	0.262311	Stein, R., Boucsein, B., Meyer, H., 2006. Anoxia and high primary production in the Paleogene central Arctic Ocean: First detailed records from Lomonosov Ridge. Geophysical Research Letters 33. Schoon et al., 2013, Recognition of Early Eocene global carbon isotope excursions using lipids of marine Thaumarchaeota. The Paleocene–Eocene Thermal Maximum (PETM; ∼56 Ma) and EoceneThermal Maximum2(ETM2;…				K1-	Lomonosov Ridge, IODP Exp 302 (ACEX)	central Arctic Ocean	-	-	Unit 3	Gray, very dark gray, and olive-gray, firm to very firm clay and silty clay. Submillimeter-scale laminations are present in much of the unit. Millimeter- to centimeter-scale pyrite concretions and slight bioturbation are common (Backman, J., Moran, K., McInroy, D.B., Mayer, L.A., and the Expedition 302 Scientists Proceedings of the Integrated Ocean Drilling Program, Volume 302)
LR-302-4A-27-1/146	OIDP302, Arctic Ocean	53	236.677	168.058	89.187	172.663	174.642	476.47	25.3415	111.801	53	1.64622	1.45808	2.07552	1.91048	0.032	0.0305	1.88102	42.2468	36.1962	40.4454	0.68674	Stein, R., Boucsein, B., Meyer, H., 2006. Anoxia and high primary production in the Paleogene central Arctic Ocean: First detailed records from Lomonosov Ridge. Geophysical Research Letters 33. Schoon et al., 2013, Recognition of Early Eocene global carbon isotope excursions using lipids of marine Thaumarchaeota. The Paleocene–Eocene Thermal Maximum (PETM; ∼56 Ma) and EoceneThermal Maximum2(ETM2;…				K1-	Lomonosov Ridge, IODP Exp 302 (ACEX)	central Arctic Ocean	-	-	Unit 3	Gray, very dark gray, and olive-gray, firm to very firm clay and silty clay. Submillimeter-scale laminations are present in much of the unit. Millimeter- to centimeter-scale pyrite concretions and slight bioturbation are common (Backman, J., Moran, K., McInroy, D.B., Mayer, L.A., and the Expedition 302 Scientists Proceedings of the Integrated Ocean Drilling Program, Volume 302)
LR-302-4A-27-1/146	OIDP302, Arctic Ocean	53	174.276	370.651	69.8364	515.265	132.077	805.356	42.6981	116.151	53	10.2575	1.62306	6.20529	2.50131	0.032	0.0325	13.2897	240.56	210.016	225.333	0.481595	Stein, R., Boucsein, B., Meyer, H., 2006. Anoxia and high primary production in the Paleogene central Arctic Ocean: First detailed records from Lomonosov Ridge. Geophysical Research Letters 33. Schoon et al., 2013, Recognition of Early Eocene global carbon isotope excursions using lipids of marine Thaumarchaeota. The Paleocene–Eocene Thermal Maximum (PETM; ∼56 Ma) and EoceneThermal Maximum2(ETM2;…				K1-	Lomonosov Ridge, IODP Exp 302 (ACEX)	central Arctic Ocean	-	-	Unit 3	Gray, very dark gray, and olive-gray, firm to very firm clay and silty clay. Submillimeter-scale laminations are present in much of the unit. Millimeter- to centimeter-scale pyrite concretions and slight bioturbation are common (Backman, J., Moran, K., McInroy, D.B., Mayer, L.A., and the Expedition 302 Scientists Proceedings of the Integrated Ocean Drilling Program, Volume 302)
LR-302-4A-27-1/146	OIDP302, Arctic Ocean	53	36.1632	236.406	479.857	406.535	347.24	163.653	44.2455	113.786	53	4.29659	7.52343	15.0707	0.5945	0.032	0.0445	3.63318	114.171	98.7443	108.912	1.70109	Stein, R., Boucsein, B., Meyer, H., 2006. Anoxia and high primary production in the Paleogene central Arctic Ocean: First detailed records from Lomonosov Ridge. Geophysical Research Letters 33. Schoon et al., 2013, Recognition of Early Eocene global carbon isotope excursions using lipids of marine Thaumarchaeota. The Paleocene–Eocene Thermal Maximum (PETM; ∼56 Ma) and EoceneThermal Maximum2(ETM2;…				K1-	Lomonosov Ridge, IODP Exp 302 (ACEX)	central Arctic Ocean	-	-	Unit 3	Gray, very dark gray, and olive-gray, firm to very firm clay and silty clay. Submillimeter-scale laminations are present in much of the unit. Millimeter- to centimeter-scale pyrite concretions and slight bioturbation are common (Backman, J., Moran, K., McInroy, D.B., Mayer, L.A., and the Expedition 302 Scientists Proceedings of the Integrated Ocean Drilling Program, Volume 302)
LR-302-4A-27-1/146	OIDP302, Arctic Ocean	53	57.9482	191.358	111.452	649.599	404.254	354.74	63.4623	174.12	53	3.37249	8.09385	8.15241	1.3168	0.032	0.04	8.67545	69.8615	62.59	64.8034	0.764371	Stein, R., Boucsein, B., Meyer, H., 2006. Anoxia and high primary production in the Paleogene central Arctic Ocean: First detailed records from Lomonosov Ridge. Geophysical Research Letters 33. Schoon et al., 2013, Recognition of Early Eocene global carbon isotope excursions using lipids of marine Thaumarchaeota. The Paleocene–Eocene Thermal Maximum (PETM; ∼56 Ma) and EoceneThermal Maximum2(ETM2;…				K1-	Lomonosov Ridge, IODP Exp 302 (ACEX)	central Arctic Ocean	-	-	Unit 3	Gray, very dark gray, and olive-gray, firm to very firm clay and silty clay. Submillimeter-scale laminations are present in much of the unit. Millimeter- to centimeter-scale pyrite concretions and slight bioturbation are common (Backman, J., Moran, K., McInroy, D.B., Mayer, L.A., and the Expedition 302 Scientists Proceedings of the Integrated Ocean Drilling Program, Volume 302)
LR-302-4A-30-2/72	OIDP302, Arctic Ocean	56	28.3504	338.735	395.479	383.67	1445.75	417.416	28.5338	86.8855	56	1.68304	3.22674	5.28694	3.45982	0.019	0.0510125	5.8615	188.858	171.013	183.732	3.30072	Stein, R., Boucsein, B., Meyer, H., 2006. Anoxia and high primary production in the Paleogene central Arctic Ocean: First detailed records from Lomonosov Ridge. Geophysical Research Letters 33. Schoon et al., 2013, Recognition of Early Eocene global carbon isotope excursions using lipids of marine Thaumarchaeota. The Paleocene–Eocene Thermal Maximum (PETM; ∼56 Ma) and EoceneThermal Maximum2(ETM2;…				K1-	Lomonosov Ridge, IODP Exp 302 (ACEX)	central Arctic Ocean	-	-	Unit 3	Gray, very dark gray, and olive-gray, firm to very firm clay and silty clay. Submillimeter-scale laminations are present in much of the unit. Millimeter- to centimeter-scale pyrite concretions and slight bioturbation are common (Backman, J., Moran, K., McInroy, D.B., Mayer, L.A., and the Expedition 302 Scientists Proceedings of the Integrated Ocean Drilling Program, Volume 302)
LR-302-4A-30-2/72	OIDP302, Arctic Ocean	56	94.5695	296.736	338.602	337.103	1211.34	416.853	31.8592	104.819	56	1.81282	4.07144	5.99132	3.07171	0.019	0.0802326	7.44821	210.761	188.741	201.941	2.85457	Stein, R., Boucsein, B., Meyer, H., 2006. Anoxia and high primary production in the Paleogene central Arctic Ocean: First detailed records from Lomonosov Ridge. Geophysical Research Letters 33. Schoon et al., 2013, Recognition of Early Eocene global carbon isotope excursions using lipids of marine Thaumarchaeota. The Paleocene–Eocene Thermal Maximum (PETM; ∼56 Ma) and EoceneThermal Maximum2(ETM2;…				K4-	Lomonosov Ridge, IODP Exp 302 (ACEX)	central Arctic Ocean	-	-	Unit 3	Gray, very dark gray, and olive-gray, firm to very firm clay and silty clay. Submillimeter-scale laminations are present in much of the unit. Millimeter- to centimeter-scale pyrite concretions and slight bioturbation are common (Backman, J., Moran, K., McInroy, D.B., Mayer, L.A., and the Expedition 302 Scientists Proceedings of the Integrated Ocean Drilling Program, Volume 302)
LR-302-4A-30-2/72	OIDP302, Arctic Ocean	56	440.071	16.5885	80.2279	485.324	119.41	106.649	32.9288	90.467	56	1.46041	0.801512	5.20631	3.06633	0.019	0.0305	1.17487	161.409	153.796	151.052	2.26316	Stein, R., Boucsein, B., Meyer, H., 2006. Anoxia and high primary production in the Paleogene central Arctic Ocean: First detailed records from Lomonosov Ridge. Geophysical Research Letters 33. Schoon et al., 2013, Recognition of Early Eocene global carbon isotope excursions using lipids of marine Thaumarchaeota. The Paleocene–Eocene Thermal Maximum (PETM; ∼56 Ma) and EoceneThermal Maximum2(ETM2;…				K1-	Lomonosov Ridge, IODP Exp 302 (ACEX)	central Arctic Ocean	-	-	Unit 3	Gray, very dark gray, and olive-gray, firm to very firm clay and silty clay. Submillimeter-scale laminations are present in much of the unit. Millimeter- to centimeter-scale pyrite concretions and slight bioturbation are common (Backman, J., Moran, K., McInroy, D.B., Mayer, L.A., and the Expedition 302 Scientists Proceedings of the Integrated Ocean Drilling Program, Volume 302)
LR-302-4A-30-2/72	OIDP302, Arctic Ocean	56	145.387	129.713	706.476	1448.85	95.0123	161.792	74.4842	396.578	56	2.13334	1.96183	11.1013	8.02525	0.019	0.0325	1.68482	287.031	264.168	265.983	9.32807	Stein, R., Boucsein, B., Meyer, H., 2006. Anoxia and high primary production in the Paleogene central Arctic Ocean: First detailed records from Lomonosov Ridge. Geophysical Research Letters 33. Schoon et al., 2013, Recognition of Early Eocene global carbon isotope excursions using lipids of marine Thaumarchaeota. The Paleocene–Eocene Thermal Maximum (PETM; ∼56 Ma) and EoceneThermal Maximum2(ETM2;…				K4-	Lomonosov Ridge, IODP Exp 302 (ACEX)	central Arctic Ocean	-	-	Unit 3	Gray, very dark gray, and olive-gray, firm to very firm clay and silty clay. Submillimeter-scale laminations are present in much of the unit. Millimeter- to centimeter-scale pyrite concretions and slight bioturbation are common (Backman, J., Moran, K., McInroy, D.B., Mayer, L.A., and the Expedition 302 Scientists Proceedings of the Integrated Ocean Drilling Program, Volume 302)
LR-302-4A-30-2/72	OIDP302, Arctic Ocean	56	3069.54	37.1893	161.502	530.05	238.682	1251.75	305.28	680.944	56	8.59296	3.26301	100.418	25.472	0.019	0.605921	7.04622	139.601	124.883	134.53	3.21058	Stein, R., Boucsein, B., Meyer, H., 2006. Anoxia and high primary production in the Paleogene central Arctic Ocean: First detailed records from Lomonosov Ridge. Geophysical Research Letters 33. Schoon et al., 2013, Recognition of Early Eocene global carbon isotope excursions using lipids of marine Thaumarchaeota. The Paleocene–Eocene Thermal Maximum (PETM; ∼56 Ma) and EoceneThermal Maximum2(ETM2;…				K4-	Lomonosov Ridge, IODP Exp 302 (ACEX)	central Arctic Ocean	-	-	Unit 3	Gray, very dark gray, and olive-gray, firm to very firm clay and silty clay. Submillimeter-scale laminations are present in much of the unit. Millimeter- to centimeter-scale pyrite concretions and slight bioturbation are common (Backman, J., Moran, K., McInroy, D.B., Mayer, L.A., and the Expedition 302 Scientists Proceedings of the Integrated Ocean Drilling Program, Volume 302)
DG006	Campbell R. Canada	83	193.714	8.95258	86.1927	271.814	8.2273	16.3343	1.099	0.221844	83	0.489263	0.077	0.0976526	0.128	0.026	0.0260373	0.149906	1.71336	1.35464	1.50403	0.0065	Tuffaceous layer in Upper Comox has U-Pb age of 82.5±1 Ma, Kenyon, c., Bickford, C.G.C., Hoffman, G. 1992. Quinsam and Chute Creek coal deposits (NTS 92F/13,14); British Columbia Ministry of Mines and Petroleum Resources, Paper 1991-3, 90p, Mustard, P., 1994, The Upper Cretaceus Nanaimo Group, Georgia Basin GSC Bullletin 481				J3-	British Columbia, Campbell River	Canada	Nanaimo	Comox	Cumberland	shallow sea shales
DG006	Campbell R. Canada	83	17.0197	21.4993	84.911	89.5603	21.0358	167.453	1.159	1.23338	83	0.668294	0.081	0.386316	0.135	0.026	0.0075	0.353573	9.52585	8.01522	8.43277	0.0668277
DG006	Campbell R. Canada	83	1472.17	102.584	532.64	389.501	47.9929	340.606	2.29375	7.16527	83	4.68561	0.592385	1.85792	0.1285	0.026	0.0746059	1.94453	21.2563	18.5705	18.9993	0.048776	Tuffaceous layer in Upper Comox has U-Pb age of 82.5±1 Ma, Kenyon, c., Bickford, C.G.C., Hoffman, G. 1992. Quinsam and Chute Creek coal deposits (NTS 92F/13,14); British Columbia Ministry of Mines and Petroleum Resources, Paper 1991-3, 90p, Mustard, P., 1994, The Upper Cretaceus Nanaimo Group, Georgia Basin GSC Bullletin 481				J3-	British Columbia, Campbell River	Canada	Nanaimo	Comox	Cumberland	shallow sea shales
DG006	Campbell R. Canada	83	283.163	15.9221	212.213	318.972	6.77409	14.4616	2.66512	0.158864	83	1.61999	0.077	0.0896298	0.128	0.026	0.0345555	0.334994	1.84117	1.71029	1.69365	0.0065	Tuffaceous layer in Upper Comox has U-Pb age of 82.5±1 Ma, Kenyon, c., Bickford, C.G.C., Hoffman, G. 1992. Quinsam and Chute Creek coal deposits (NTS 92F/13,14); British Columbia Ministry of Mines and Petroleum Resources, Paper 1991-3, 90p, Mustard, P., 1994, The Upper Cretaceus Nanaimo Group, Georgia Basin GSC Bullletin 481				J3-	British Columbia, Campbell River	Canada	Nanaimo	Comox	Cumberland	shallow sea shales
DG006	Campbell R. Canada	83	7.1954	16.5437	291.795	188.179	8.64607	306.72	3.13278	1.59051	83	4.36789	0.314864	0.225679	0.137	0.026	0.0309759	0.3055	5.66202	4.91156	5.75016	0.0774431	Tuffaceous layer in Upper Comox has U-Pb age of 82.5±1 Ma, Kenyon, c., Bickford, C.G.C., Hoffman, G. 1992. Quinsam and Chute Creek coal deposits (NTS 92F/13,14); British Columbia Ministry of Mines and Petroleum Resources, Paper 1991-3, 90p, Mustard, P., 1994, The Upper Cretaceus Nanaimo Group, Georgia Basin GSC Bullletin 481				J3-	British Columbia, Campbell River	Canada	Nanaimo	Comox	Cumberland	shallow sea shales
DG006	Campbell R. Canada	83	669.674	62.9421	116.265	133.026	23.6457	630.283	3.35596	7.19676	83	0.195441	0.0765	0.957534	0.1275	0.026	0.007	0.074154	14.3429	12.6886	13.3893	0.067606	Stein, R., Boucsein, B., Meyer, H., 2006. Anoxia and high primary production in the Paleogene central Arctic Ocean: First detailed records from Lomonosov Ridge. Geophysical Research Letters 33. Schoon et al., 2013, Recognition of Early Eocene global carbon isotope excursions using lipids of marine Thaumarchaeota. The Paleocene–Eocene Thermal Maximum (PETM; ∼56 Ma) and EoceneThermal Maximum2(ETM2;…				K4-	Lomonosov Ridge, IODP Exp 302 (ACEX)	central Arctic Ocean	-	-	Unit 3	Gray, very dark gray, and olive-gray, firm to very firm clay and silty clay. Submillimeter-scale laminations are present in much of the unit. Millimeter- to centimeter-scale pyrite concretions and slight bioturbation are common (Backman, J., Moran, K., McInroy, D.B., Mayer, L.A., and the Expedition 302 Scientists Proceedings of the Integrated Ocean Drilling Program, Volume 302)
DG006	Campbell R. Canada	83	1413.53	84.5544	435.723	511.713	50.7753	149.034	3.447	7.39977	83	3.51268	0.719923	1.88664	0.128	0.026	0.113351	1.39122	17.5065	15.6493	16.4354	0.0309974	Tuffaceous layer in Upper Comox has U-Pb age of 82.5±1 Ma, Kenyon, c., Bickford, C.G.C., Hoffman, G. 1992. Quinsam and Chute Creek coal deposits (NTS 92F/13,14); British Columbia Ministry of Mines and Petroleum Resources, Paper 1991-3, 90p, Mustard, P., 1994, The Upper Cretaceus Nanaimo Group, Georgia Basin GSC Bullletin 481				J3-	British Columbia, Campbell River	Canada	Nanaimo	Comox	Cumberland	shallow sea shales
DG006	Campbell R. Canada	83	348.308	11.9315	136.851	558.456	13.626	62.4907	3.84434	0.473181	83	0.42146	0.0825	0.344385	0.137	0.026	0.0374035	0.120346	6.07134	5.34604	5.52014	0.0277288	Tuffaceous layer in Upper Comox has U-Pb age of 82.5±1 Ma, Kenyon, c., Bickford, C.G.C., Hoffman, G. 1992. Quinsam and Chute Creek coal deposits (NTS 92F/13,14); British Columbia Ministry of Mines and Petroleum Resources, Paper 1991-3, 90p, Mustard, P., 1994, The Upper Cretaceus Nanaimo Group, Georgia Basin GSC Bullletin 481				J3-	British Columbia, Campbell River	Canada	Nanaimo	Comox	Cumberland	shallow sea shales
DG006	Campbell R. Canada	83	1377.03	4.40727	42.5323	191.541	15.9288	12.3474	3.87382	0.218092	83	0.208046	0.0765	0.0511688	0.1275	0.026	0.0729535	0.0701421	0.699237	0.671932	0.696172	0.0065	Tuffaceous layer in Upper Comox has U-Pb age of 82.5±1 Ma, Kenyon, c., Bickford, C.G.C., Hoffman, G. 1992. Quinsam and Chute Creek coal deposits (NTS 92F/13,14); British Columbia Ministry of Mines and Petroleum Resources, Paper 1991-3, 90p, Mustard, P., 1994, The Upper Cretaceus Nanaimo Group, Georgia Basin GSC Bullletin 481				J3-	British Columbia, Campbell River	Canada	Nanaimo	Comox	Cumberland	shallow sea shales
DG006	Campbell R. Canada	83	372.829	4.80003	86.2374	364.403	13.9077	12.8002	3.93452	0.181459	83	0.498127	0.077	0.0639758	0.128	0.026	0.027	0.122986	0.840976	0.726805	0.827113	0.0065	Tuffaceous layer in Upper Comox has U-Pb age of 82.5±1 Ma, Kenyon, c., Bickford, C.G.C., Hoffman, G. 1992. Quinsam and Chute Creek coal deposits (NTS 92F/13,14); British Columbia Ministry of Mines and Petroleum Resources, Paper 1991-3, 90p, Mustard, P., 1994, The Upper Cretaceus Nanaimo Group, Georgia Basin GSC Bullletin 481				J3-	British Columbia, Campbell River	Canada	Nanaimo	Comox	Cumberland	shallow sea shales
DG006	Campbell R. Canada	83	301.884	54.3608	262.3	266.181	44.3214	294.534	4.82708	3.27019	83	1.04306	0.189305	2.18995	0.1545	0.026	0.0283548	0.51236	19.3366	15.5471	16.5615	0.098508	Tuffaceous layer in Upper Comox has U-Pb age of 82.5±1 Ma, Kenyon, C., Bickford, C.G.C., Hoffman, G. 1992. Quinsam and Chute Creek coal deposits (NTS 92F/13,14); British Columbia Ministry of Mines and Petroleum Resources, Paper 1991-3, 90p, Mustard, P., 1994, The Upper Cretaceus Nanaimo Group, Georgia Basin GSC Bullletin 481				J3-	British Columbia, Campbell River	Canada	Nanaimo	Comox	Cumberland	shallow sea shales
DG006	Campbell R. Canada	83	16.8901	35.823	158.947	146.764	28.7035	371.299	7.96898	8.1813	83	1.10868	0.0885	2.5186	0.1475	0.026	0.0546123	0.152356	18.2892	15.4049	15.9658	0.140221	Stein, R., Boucsein, B., Meyer, H., 2006. Anoxia and high primary production in the Paleogene central Arctic Ocean: First detailed records from Lomonosov Ridge. Geophysical Research Letters 33. Schoon et al., 2013, Recognition of Early Eocene global carbon isotope excursions using lipids of marine Thaumarchaeota. The Paleocene–Eocene Thermal Maximum (PETM; ∼56 Ma) and EoceneThermal Maximum2(ETM2;…				K4-	Lomonosov Ridge, IODP Exp 302 (ACEX)	central Arctic Ocean	-	-	Unit 3	Gray, very dark gray, and olive-gray, firm to very firm clay and silty clay. Submillimeter-scale laminations are present in much of the unit. Millimeter- to centimeter-scale pyrite concretions and slight bioturbation are common (Backman, J., Moran, K., McInroy, D.B., Mayer, L.A., and the Expedition 302 Scientists Proceedings of the Integrated Ocean Drilling Program, Volume 302)
DG007	Campbell R. Canada	83	5630.76	53.2959	148.201	609.782	52.5586	42.9126	1.1365	2.90403	83	1.40713	0.249347	1.40149	0.420329	0.0095	0.0075	0.272643	10.6608	9.60516	9.43073	0.210062	Tuffaceous layer in Upper Comox has U-Pb age of 82.5±1 Ma, Kenyon, c., Bickford, C.G.C., Hoffman, G. 1992. Quinsam and Chute Creek coal deposits (NTS 92F/13,14); British Columbia Ministry of Mines and Petroleum Resources, Paper 1991-3, 90p, Mustard, P., 1994, The Upper Cretaceus Nanaimo Group, Georgia Basin GSC Bullletin 481				J3-	British Columbia, Campbell River	Canada	Nanaimo	Comox	Cumberland	shallow sea shales
DG007	Campbell R. Canada	83	118.406	12.3089	26.1651	74.0367	28.5427	254.776	1.19	0.483147	83	0.0205	0.220084	0.130908	0.139	0.0095	0.0075	0.0075	1.40541	1.18953	1.22984	0.214203	Tuffaceous layer in Upper Comox has U-Pb age of 82.5±1 Ma, Kenyon, c., Bickford, C.G.C., Hoffman, G. 1992. Quinsam and Chute Creek coal deposits (NTS 92F/13,14); British Columbia Ministry of Mines and Petroleum Resources, Paper 1991-3, 90p, Mustard, P., 1994, The Upper Cretaceus Nanaimo Group, Georgia Basin GSC Bullletin 481				J3-	British Columbia, Campbell River	Canada	Nanaimo	Comox	Cumberland	shallow sea shales
DG007	Campbell R. Canada	83	313.874	27.351	30.6984	83.2456	51.6097	162.571	1.194	2.48755	83	0.0455647	0.0835	0.335547	0.139	0.0095	0.0075	0.0075	1.3808	1.10512	1.13158	0.0282614	Tuffaceous layer in Upper Comox has U-Pb age of 82.5±1 Ma, Kenyon, c., Bickford, C.G.C., Hoffman, G. 1992. Quinsam and Chute Creek coal deposits (NTS 92F/13,14); British Columbia Ministry of Mines and Petroleum Resources, Paper 1991-3, 90p, Mustard, P., 1994, The Upper Cretaceus Nanaimo Group, Georgia Basin GSC Bullletin 481				J3-	British Columbia, Campbell River	Canada	Nanaimo	Comox	Cumberland	shallow sea shales
DG007	Campbell R. Canada	83	352.094	31.8199	32.4278	71.2993	47.7374	172.515	3.13406	2.2047	83	0.02	0.083	0.257015	0.1385	0.0095	0.0075	0.0349712	1.35914	1.15964	1.19274	0.0259854	Tuffaceous layer in Upper Comox has U-Pb age of 82.5±1 Ma, Kenyon, c., Bickford, C.G.C., Hoffman, G. 1992. Quinsam and Chute Creek coal deposits (NTS 92F/13,14); British Columbia Ministry of Mines and Petroleum Resources, Paper 1991-3, 90p, Mustard, P., 1994, The Upper Cretaceus Nanaimo Group, Georgia Basin GSC Bullletin 481				J3-	British Columbia, Campbell River	Canada	Nanaimo	Comox	Cumberland	shallow sea shales
DG007	Campbell R. Canada	83	86.0669	21.6027	42.2161	29.6241	43.7874	176.774	3.23202	1.12075	83	0.0606547	0.287157	0.390621	0.1695	0.0095	0.0203812	0.0095	3.5312	3.12196	3.12858	0.173403	Tuffaceous layer in Upper Comox has U-Pb age of 82.5±1 Ma, Kenyon, c., Bickford, C.G.C., Hoffman, G. 1992. Quinsam and Chute Creek coal deposits (NTS 92F/13,14); British Columbia Ministry of Mines and Petroleum Resources, Paper 1991-3, 90p, Mustard, P., 1994, The Upper Cretaceus Nanaimo Group, Georgia Basin GSC Bullletin 481				J3-	British Columbia, Campbell River	Canada	Nanaimo	Comox	Cumberland	shallow sea shales
DG007	Campbell R. Canada	83	695.189	38.8587	104.651	356.819	59.9627	349.91	3.40717	15.0166	83	0.663835	0.17228	1.08506	0.1325	0.0095	0.0075	0.222013	17.2615	14.6375	15.2397	0.144006	Tuffaceous layer in Upper Comox has U-Pb age of 82.5±1 Ma, Kenyon, c., Bickford, C.G.C., Hoffman, G. 1992. Quinsam and Chute Creek coal deposits (NTS 92F/13,14); British Columbia Ministry of Mines and Petroleum Resources, Paper 1991-3, 90p, Mustard, P., 1994, The Upper Cretaceus Nanaimo Group, Georgia Basin GSC Bullletin 481				J3-	British Columbia, Campbell River	Canada	Nanaimo	Comox	Cumberland	shallow sea shales
DG007	Campbell R. Canada	83	1123.52	70.4664	201.516	427.209	139.916	453.199	4.35965	4.11306	83	1.899	0.799987	1.46453	0.138	0.0095	0.0604862	0.145815	13.0777	11.7294	11.9407	0.391934	Tuffaceous layer in Upper Comox has U-Pb age of 82.5±1 Ma, Kenyon, c., Bickford, C.G.C., Hoffman, G. 1992. Quinsam and Chute Creek coal deposits (NTS 92F/13,14); British Columbia Ministry of Mines and Petroleum Resources, Paper 1991-3, 90p, Mustard, P., 1994, The Upper Cretaceus Nanaimo Group, Georgia Basin GSC Bullletin 481				J3-	British Columbia, Campbell River	Canada	Nanaimo	Comox	Cumberland	shallow sea shales
DG007	Campbell R. Canada	83	131.682	20.4866	31.4266	98.0503	64.8969	223.995	4.38735	1.39747	83	0.0603604	0.298458	0.324504	0.312462	0.0095	0.0085	0.0191413	2.60294	2.50428	2.48655	0.0613863	Tuffaceous layer in Upper Comox has U-Pb age of 82.5±1 Ma, Kenyon, c., Bickford, C.G.C., Hoffman, G. 1992. Quinsam and Chute Creek coal deposits (NTS 92F/13,14); British Columbia Ministry of Mines and Petroleum Resources, Paper 1991-3, 90p, Mustard, P., 1994, The Upper Cretaceus Nanaimo Group, Georgia Basin GSC Bullletin 481				J3-	British Columbia, Campbell River	Canada	Nanaimo	Comox	Cumberland	shallow sea shales
DG007	Campbell R. Canada	83	532.741	59.4114	206.948	247.525	108.369	951.55	4.48783	4.37952	83	1.55433	0.740305	1.62953	0.478902	0.0095	0.0479468	0.260205	13.0241	11.2768	12.2112	0.170909	Tuffaceous layer in Upper Comox has U-Pb age of 82.5±1 Ma, Kenyon, c., Bickford, C.G.C., Hoffman, G. 1992. Quinsam and Chute Creek coal deposits (NTS 92F/13,14); British Columbia Ministry of Mines and Petroleum Resources, Paper 1991-3, 90p, Mustard, P., 1994, The Upper Cretaceus Nanaimo Group, Georgia Basin GSC Bullletin 481				J3-	British Columbia, Campbell River	Canada	Nanaimo	Comox	Cumberland	shallow sea shales
DG007	Campbell R. Canada	83	203.785	65.4737	408.33	171.44	8.89465	640.15	5.43466	9.80365	83	0.027	0.623803	2.22266	0.1855	0.0095	0.0281582	0.13537	16.4865	15.0144	15.8642	0.0519047	Tuffaceous layer in Upper Comox has U-Pb age of 82.5±1 Ma, Kenyon, c., Bickford, C.G.C., Hoffman, G. 1992. Quinsam and Chute Creek coal deposits (NTS 92F/13,14); British Columbia Ministry of Mines and Petroleum Resources, Paper 1991-3, 90p, Mustard, P., 1994, The Upper Cretaceus Nanaimo Group, Georgia Basin GSC Bullletin 481				J3-	British Columbia, Campbell River	Canada	Nanaimo	Comox	Cumberland	shallow sea shales
DG007	Campbell R. Canada	83	1827.23	92.8625	225.283	331.638	77.4742	448.569	7.09945	3.8664	83	1.56678	0.767918	1.81815	0.15	0.0095	0.0442804	0.147259	9.95859	10.3906	9.85574	0.395084	Tuffaceous layer in Upper Comox has U-Pb age of 82.5±1 Ma, Kenyon, c., Bickford, C.G.C., Hoffman, G. 1992. Quinsam and Chute Creek coal deposits (NTS 92F/13,14); British Columbia Ministry of Mines and Petroleum Resources, Paper 1991-3, 90p, Mustard, P., 1994, The Upper Cretaceus Nanaimo Group, Georgia Basin GSC Bullletin 481				J3-	British Columbia, Campbell River	Canada	Nanaimo	Comox	Cumberland	shallow sea shales
DG007	Campbell R. Canada	83		70.229	210.133	379.745	51.8543	825.463	7.4395	3.75421	83	1.51924	0.916637	3.98618	0.8815	0.0095	0.0938238	0.345694	21.0816	17.4352	20.0883	0.340214	Tuffaceous layer in Upper Comox has U-Pb age of 82.5±1 Ma, Kenyon, c., Bickford, C.G.C., Hoffman, G. 1992. Quinsam and Chute Creek coal deposits (NTS 92F/13,14); British Columbia Ministry of Mines and Petroleum Resources, Paper 1991-3, 90p, Mustard, P., 1994, The Upper Cretaceus Nanaimo Group, Georgia Basin GSC Bullletin 481				J3-	British Columbia, Campbell River	Canada	Nanaimo	Comox	Cumberland	shallow sea shales
DG007	Campbell R. Canada	83	1217.04	142.3	373.051	822.84	106.264	501.585	7.85072	11.4847	83	1.89887	0.69221	2.95075	0.570045	0.0095	0.0989498	0.870413	26.9891	23.5967	24.7967	0.177197	Tuffaceous layer in Upper Comox has U-Pb age of 82.5±1 Ma, Kenyon, c., Bickford, C.G.C., Hoffman, G. 1992. Quinsam and Chute Creek coal deposits (NTS 92F/13,14); British Columbia Ministry of Mines and Petroleum Resources, Paper 1991-3, 90p, Mustard, P., 1994, The Upper Cretaceus Nanaimo Group, Georgia Basin GSC Bullletin 481				J3-	British Columbia, Campbell River	Canada	Nanaimo	Comox	Cumberland	shallow sea shales
THA01-2486.2	Otway basin. Aus.	91	107.326	62.9961	62.0364	19.5922	200.755	207.966	3.89628	4.55935	91	0.182365	0.0895712	1.23878	0.228264	0.0065	0.0035	0.640309	44.3819	38.8949	41.5641	1.47483	Tuffaceous layer in Upper Comox has U-Pb age of 82.5±1 Ma, Kenyon, c., Bickford, C.G.C., Hoffman, G. 1992. Quinsam and Chute Creek coal deposits (NTS 92F/13,14); British Columbia Ministry of Mines and Petroleum Resources, Paper 1991-3, 90p, Mustard, P., 1994, The Upper Cretaceus Nanaimo Group, Georgia Basin GSC Bullletin 481				J3-	British Columbia, Campbell River	Canada	Nanaimo	Comox	Cumberland	shallow sea shales
THA01-2486.2	Otway basin. Aus.	91	2.51974	330.013	500.81	117.454	3.06233	138.748	5.784	8.50177	91	1.05932	0.0483529	5.9918	0.035	0.0035	0.0185527	3.51709	273.521	242.536	255.984	0.0639093
THA01-2486.2	Otway basin. Aus.	91	13.496	556.942	768.884	154.356	5.42412	280.819	10.2081	16.019	91	1.16277		12.0175	0.0555	0.0065	0.0301976	4.63916	693.254	621.848	654.985	0.168309	Late Cretaceous (Turonian) palynostratigraphy, Woodside, 2007. Well completion report THA01, THA02, THA03, THA04 Interpretative data (T/L2, Otway Basin).				C4-	THA01 drill hole, Otway Basin, Tasmania	Australia	Shipwreck Ssq/Sherbrook Gp	Flaxman	-	black shale with whispy sandy beds, porous 2mm pyrite layer
THA01-2486.2	Otway basin. Aus.	91	1.08125	1000.45	1342.95	183.467	1.97695	138.974	10.9975	7.70634	91	2.24442		6.21667	0.0385	0.004	0.0373084	3.75464	308.266	274.192	292.477	0.0285762	Late Cretaceous (Turonian) palynostratigraphy, Woodside, 2007. Well completion report THA01, THA02, THA03, THA04 Interpretative data (T/L2, Otway Basin).				C4-	THA01 drill hole, Otway Basin, Tasmania	Australia	Shipwreck Ssq/Sherbrook Gp	Flaxman	-	black shale with whispy sandy beds, porous 2mm pyrite layer
THA01-2486.2	Otway basin. Aus.	91	3.88698	343.965	642.859	131.737	6.13743	363.967	11.3414	9.92721	91	3.5778	0.120302	5.30655	0.190508	0.009	0.0529186	4.35212	582.79	518.699	556.168	0.173683	Tuffaceous layer in Upper Comox has U-Pb age of 82.5±1 Ma, Kenyon, c., Bickford, C.G.C., Hoffman, G. 1992. Quinsam and Chute Creek coal deposits (NTS 92F/13,14); British Columbia Ministry of Mines and Petroleum Resources, Paper 1991-3, 90p, Mustard, P., 1994, The Upper Cretaceus Nanaimo Group, Georgia Basin GSC Bullletin 481				J3-	British Columbia, Campbell River	Canada	Nanaimo	Comox	Cumberland	shallow sea shales
THA01-2486.2	Otway basin. Aus.	91	0.399256	1073.64	1251.01	121.674	0.0779571	177.273	11.9878	12.8149	91	1.75591		6.92262	0.0305	0.0035	0.0459605	3.24633	297.761	265.811	282.335	0.100358	Tuffaceous layer in Upper Comox has U-Pb age of 82.5±1 Ma, Kenyon, c., Bickford, C.G.C., Hoffman, G. 1992. Quinsam and Chute Creek coal deposits (NTS 92F/13,14); British Columbia Ministry of Mines and Petroleum Resources, Paper 1991-3, 90p, Mustard, P., 1994, The Upper Cretaceus Nanaimo Group, Georgia Basin GSC Bullletin 481				J3-	British Columbia, Campbell River	Canada	Nanaimo	Comox	Cumberland	shallow sea shales
Thylacine-1-2168m	Otway basin. Aus.	91	13.2278	165.401	1053.98	274.721	11.5479	265.092	8.90009	8.03979	91	5.32236	0.179794	33.1933	0.031	0.003	0.0632881	4.72722	644.546	572.014	608.653	0.0583665	Late Cretaceous (Turonian) palynostratigraphy, Woodside, 2003. Well completion report interpretative Thylacine-1 (T/30P, Offshore Otway Basin), p. 28.				E4-	Thylacine-1 drill hole, Otway Basin, Tasmania	Australia	Shipwreck Ssq/Sherbrook Gp	Flaxman	-	massive black shale with <0.5% of Py
Thylacine-1-2168m	Otway basin. Aus.	91	36.1684	298.719	852.45	192.712	42.9432	357.832	11.6856	13.6473	91	2.0522	0.146446	28.941	0.153326	0.008	0.0293171	2.48129	667.859	591.925	627.742	1.36666	Late Cretaceous (Turonian) palynostratigraphy, Woodside, 2003. Well completion report interpretative Thylacine-1 (T/30P, Offshore Otway Basin), p. 28.				E4-	Thylacine-1 drill hole, Otway Basin, Tasmania	Australia	Shipwreck Ssq/Sherbrook Gp	Flaxman	-	massive black shale with <0.5% of Py
Thylacine-1-2168m	Otway basin. Aus.	91	24.1503	174.669	3295.39	896.095	17.3647	498.369	12.3358	7.25838	91	82.6634	0.109469	15.5348	1.39247	0.0025	0.159023	49.9584	748.896	665.641	729.066	4.33455	Late Cretaceous (Turonian) palynostratigraphy, Woodside, 2007. Well completion report THA01, THA02, THA03, THA04 Interpretative data (T/L2, Otway Basin).				C4-	THA01 drill hole, Otway Basin, Tasmania	Australia	Shipwreck Ssq/Sherbrook Gp	Flaxman	-	black shale with whispy sandy beds, porous 2mm pyrite layer
Thylacine-1-2168m	Otway basin. Aus.	91	14.9159	198.619	1021.34	259.264	12.8775	368.552	13.9682	11.71	91	4.67163	0.169959	41.7063	0.072116	0.004	0.0618512	4.43277	690.356	618.159	652.063	0.0435073	Late Cretaceous (Turonian) palynostratigraphy, Woodside, 2003. Well completion report interpretative Thylacine-1 (T/30P, Offshore Otway Basin), p. 28.				E4-	Thylacine-1 drill hole, Otway Basin, Tasmania	Australia	Shipwreck Ssq/Sherbrook Gp	Flaxman	-	massive black shale with <0.5% of Py
Thylacine-1-2168m	Otway basin. Aus.	91	4.26143	54.4213	96.4738	101.532	30.2377	802.36	21.5403	5.25714	91	1.93828	0.0490036	36.8139	0.383581	0.003	0.0279981	1.22929	206.106	182.809	192.423	2.16941	Late Cretaceous (Turonian) palynostratigraphy, Woodside, 2007. Well completion report THA01, THA02, THA03, THA04 Interpretative data (T/L2, Otway Basin).				C4-	THA01 drill hole, Otway Basin, Tasmania	Australia	Shipwreck Ssq/Sherbrook Gp	Flaxman	-	black shale with whispy sandy beds, porous 2mm pyrite layer
Thylacine-1-2168m	Otway basin. Aus.	91	167.068	735.741	689.926	125.722	83.4334	1108.09	30.5409	15.7399	91	2.09935	0.359951	79.1085	0.491626	0.003	0.0314972	7.06446	315.635	280.583	298.978	0.798281	Late Cretaceous (Turonian) palynostratigraphy, Woodside, 2007. Well completion report THA01, THA02, THA03, THA04 Interpretative data (T/L2, Otway Basin).				C4-	THA01 drill hole, Otway Basin, Tasmania	Australia	Shipwreck Ssq/Sherbrook Gp	Flaxman	-	black shale with whispy sandy beds, porous 2mm pyrite layer
Thylacine-1-2168m	Otway basin. Aus.	91	261.657	47.6099	418.245	154.174	169.037	143.732		3.35993	91	13.2484	0.0475	2.01374	0.094	0.011	0.0313423	2.41838	245.599	219.741	231.612	2.01967	Late Cretaceous (Turonian) palynostratigraphy, Woodside, 2007. Well completion report THA01, THA02, THA03, THA04 Interpretative data (T/L2, Otway Basin).				C4-	THA01 drill hole, Otway Basin, Tasmania	Australia	Shipwreck Ssq/Sherbrook Gp	Flaxman	-	black shale with whispy sandy beds, porous 2mm pyrite layer
THA01-2452m	Otway basin. Aus.	92	0.440371	60.4789	541.142	132.005	1.43168	739.117	0.74108	13.1918	92	1.44242	0.0760164	39.1456				12.6587	112.292	117.963	118.823	0.0175263	Late Cretaceous (Turonian) palynostratigraphy, Woodside, 2007. Well completion report THA01, THA02, THA03, THA04 Interpretative data (T/L2, Otway Basin).		corrected 11-03-2014		C4-	THA01 drill hole, Otway Basin, Tasmania	Australia	Shipwreck Ssq/Sherbrook Gp	Upper Waarre	-	banded black shale/sandstone unit with 0.5 cm diameter pyrite nodule
THA01-2452m	Otway basin. Aus.	92	0.812877	192.784	423.267	78.4463	1.89909	650.885	1.26082	12.8456	92	0.792862	0.0363502	33.9481			0.00741747	5.28015	70.7192	72.8262	74.3357	0.0141586	Late Cretaceous (Turonian) palynostratigraphy, Woodside, 2007. Well completion report THA01, THA02, THA03, THA04 Interpretative data (T/L2, Otway Basin).		corrected 11-03-2014		C4-	THA01 drill hole, Otway Basin, Tasmania	Australia	Shipwreck Ssq/Sherbrook Gp	Upper Waarre	-	banded black shale/sandstone unit with 0.5 cm diameter pyrite nodule
THA01-2452m	Otway basin. Aus.	92	1.88391	317.309	795.905	184.097	1.57893	436.368	1.95281	9.59534	92	1.44516	0.0463414	20.9336			0.0170685	6.41625	345.88	354.279	362.088	0.0497495	Late Cretaceous (Turonian) palynostratigraphy, Woodside, 2007. Well completion report THA01, THA02, THA03, THA04 Interpretative data (T/L2, Otway Basin).		corrected 11-03-2014		C4-	THA01 drill hole, Otway Basin, Tasmania	Australia	Shipwreck Ssq/Sherbrook Gp	Upper Waarre	-	banded black shale/sandstone unit with 0.5 cm diameter pyrite nodule
THA01-2452m	Otway basin. Aus.	92	540.66	217.813	465.04	118.721	111.992	225.374	2.22593	8.05753	92	1.76134	0.101699	11.3993				4.21124	235.972	247.018	248.269	0.721598
THA01-2452m	Otway basin. Aus.	92	29.6289	94.8879	235.493	77.9101	9.50342	541.051	2.25656	10.671	92	1.11961	0.0539927	8.76279			0.014423	3.28856	202.522	209.46	207.297	0.350072	Late Cretaceous (Turonian) palynostratigraphy, Woodside, 2003. Well completion report interpretative Thylacine-1 (T/30P, Offshore Otway Basin), p. 28.				E4-	Thylacine-1 drill hole, Otway Basin, Tasmania	Australia	Shipwreck Ssq/Sherbrook Gp	Flaxman	-	massive black shale with <0.5% of Py
THA01-2452m	Otway basin. Aus.	92	37.3126	111.307	240.639	121.586	17.2726	374.418	3.49445	7.07312	92	0.836359	0.057896	13.4773	0.27501		0.0129909	2.29572	221.648	224.977	225.505	0.892737	Late Cretaceous (Turonian) palynostratigraphy, Woodside, 2003. Well completion report interpretative Thylacine-1 (T/30P, Offshore Otway Basin), p. 28.				E4-	Thylacine-1 drill hole, Otway Basin, Tasmania	Australia	Shipwreck Ssq/Sherbrook Gp	Flaxman	-	massive black shale with <0.5% of Py
THA01-2452m	Otway basin. Aus.	92	43.1868	241.974	714.514	129.399	14.5549	378.242	4.97676	10.0023	92	4.11174		20.9946	0.557177		0.0678116	8.96859	374.029	392.025	375.67	2.6482	Late Cretaceous (Turonian) palynostratigraphy, Woodside, 2003. Well completion report interpretative Thylacine-1 (T/30P, Offshore Otway Basin), p. 28.				E4-	Thylacine-1 drill hole, Otway Basin, Tasmania	Australia	Shipwreck Ssq/Sherbrook Gp	Flaxman	-	massive black shale with <0.5% of Py
THA01-2452m	Otway basin. Aus.	92	36.4135	27.4358	114.784	22.0984	12.6083	563.59		1.48616	92	1.59465		0.685801				1.77108	71.5766	63.2404	63.9886	1.08439	Late Cretaceous (Turonian) palynostratigraphy, Woodside, 2003. Well completion report interpretative Thylacine-1 (T/30P, Offshore Otway Basin), p. 28.				E4-	Thylacine-1 drill hole, Otway Basin, Tasmania	Australia	Shipwreck Ssq/Sherbrook Gp	Flaxman	-	massive black shale with <0.5% of Py
THA01-2582.4m	Otway basin. Aus.	92	1.35335	73.8177	228.203	69.6141	2.77642	120.823	1.6664	4.00593	92	1.56955		11.4207	0.0629495			1.90462	64.9812	57.1611	60.7582	0.00895697	Late Cretaceous (Turonian) palynostratigraphy, Woodside, 2007. Well completion report THA01, THA02, THA03, THA04 Interpretative data (T/L2, Otway Basin).		corrected 11-03-2014		C4-	THA01 drill hole, Otway Basin, Tasmania	Australia	Shipwreck Ssq/Sherbrook Gp	Upper Waarre	-	banded black shale/sandstone unit with 0.5 cm diameter pyrite nodule
THA01-2582.4m	Otway basin. Aus.	92	3.61498	169.759	373.652	63.7865	2.36529	356.246	3.78454	12.8577	92	3.36426	0.0658792	25.8387			0.0197824	4.82991	169.914	150.931	161.928	0.0200029	Late Cretaceous (Turonian) palynostratigraphy, Woodside, 2007. Well completion report THA01, THA02, THA03, THA04 Interpretative data (T/L2, Otway Basin).		corrected 11-03-2014		C4-	THA01 drill hole, Otway Basin, Tasmania	Australia	Shipwreck Ssq/Sherbrook Gp	Upper Waarre	-	banded black shale/sandstone unit with 0.5 cm diameter pyrite nodule
THA01-2582.4m	Otway basin. Aus.	92	1.16173	187.506	345.822	111.4	3.11032	115.657	4.197	8.15911	92	2.66732	0.114195	14.5449				2.11437	109.912	98.2815	102.802	0.0134974	Late Cretaceous (Turonian) palynostratigraphy, Woodside, 2007. Well completion report THA01, THA02, THA03, THA04 Interpretative data (T/L2, Otway Basin).		corrected 11-03-2014		C4-	THA01 drill hole, Otway Basin, Tasmania	Australia	Shipwreck Ssq/Sherbrook Gp	Upper Waarre	-	banded black shale/sandstone unit with 0.5 cm diameter pyrite nodule
THA01-2582.4m	Otway basin. Aus.	92	2.91105	569.064	973.769	120.986	4.46584	270.669	7.35593	13.7341	92	4.43436	0.202706	31.145			0.0400547	3.19401	263.888	234.749	249.813	0.058386	Late Cretaceous (Turonian) palynostratigraphy, Woodside, 2007. Well completion report THA01, THA02, THA03, THA04 Interpretative data (T/L2, Otway Basin).		corrected 11-03-2014		C4-	THA01 drill hole, Otway Basin, Tasmania	Australia	Shipwreck Ssq/Sherbrook Gp	Upper Waarre	-	banded black shale/sandstone unit with 0.5 cm diameter pyrite nodule
THA01-2582.4m	Otway basin. Aus.	92	73.5677	186.509	1002.05	107.263	89.9034	128.496	8.21366	6.71796	92	7.04461		27.4974	0.578874		0.041082	3.09711	284.741	254.022	274.482	1.08843	Late Cretaceous (Turonian) palynostratigraphy, Woodside, 2007. Well completion report THA01, THA02, THA03, THA04 Interpretative data (T/L2, Otway Basin).		corrected 11-03-2014		C4-	THA01 drill hole, Otway Basin, Tasmania	Australia	Shipwreck Ssq/Sherbrook Gp	Upper Waarre	-	banded black shale/sandstone unit with 0.5 cm diameter pyrite nodule
THA01-2582.4m	Otway basin. Aus.	92	84.3344	458.466	1969.86	446.98	32.9274	384.059	13.0104	16.558	92	18.4445	0.0564785	36.0498	3.26135		0.246186	4.66251	1371.34	1174.54	1314.67	7.60929	Late Cretaceous (Turonian) palynostratigraphy, Woodside, 2007. Well completion report THA01, THA02, THA03, THA04 Interpretative data (T/L2, Otway Basin).		corrected 11-03-2014		C4-	THA01 drill hole, Otway Basin, Tasmania	Australia	Shipwreck Ssq/Sherbrook Gp	Upper Waarre	-	banded black shale/sandstone unit with 0.5 cm diameter pyrite nodule
THA01-2582.4m	Otway basin. Aus.	92	2471.44	493.023	1204.94	230.223	49.4364	372.51	14.6988	12.0238	92	10.9373	0.181172	41.9456	3.0098		0.152434	3.27206	707.343	628.3	672.655	3.42062	Late Cretaceous (Turonian) palynostratigraphy, Woodside, 2007. Well completion report THA01, THA02, THA03, THA04 Interpretative data (T/L2, Otway Basin).		corrected 11-03-2014		C4-	THA01 drill hole, Otway Basin, Tasmania	Australia	Shipwreck Ssq/Sherbrook Gp	Upper Waarre	-	banded black shale/sandstone unit with 0.5 cm diameter pyrite nodule
CR-1A	Canarvon Basin Aus.	125	9.40605	117.518	50.8499	72.6643	73.2746	1270.87	2.60663	19.0143	125	0.208182	0.043575	3.6391	0.147348			2.02419	64.985	61.7795	59.6243	1.92259	Early Cretaceous (Barremian-Aptian) fossil assemblages, Taylor, B.A., Haig, D.W., 2001. Barremian Foraminifera from the Muderong Shale, oldest marine sequence in the Cretaceous of the southern Carnarvon Basin, Western Australia. Micropaleontology 47, 125-143.			dif	D4-	Cape Range 1 drill hole, Carnarvon Basin, WA	Australia	Winning	Muderong Shale	-	black/grey carbonaceous mudstone; <1% pyrite
CR-1A	Canarvon Basin Aus.	125	12.1347	91.0351	60.9159	74.7337	82.8961	1248.88	2.65768	21.3952	125	0.190584	0.0378765	4.82365	0.138684		0.00383084	2.08079	68.1442	56.7264	61.7264	1.90328	Early Cretaceous (Barremian-Aptian) fossil assemblages, Taylor, B.A., Haig, D.W., 2001. Barremian Foraminifera from the Muderong Shale, oldest marine sequence in the Cretaceous of the southern Carnarvon Basin, Western Australia. Micropaleontology 47, 125-143.			dif	D4-	Cape Range 1 drill hole, Carnarvon Basin, WA	Australia	Winning	Muderong Shale	-	black/grey carbonaceous mudstone; <1% pyrite
CR-1A	Canarvon Basin Aus.	125	11.6765	74.0479	62.3354	78.0745	76.8168	1225.06	2.66733	19.8655	125	0.191969	0.0450732	5.60391	0.130072		0.00507596	1.93442	64.6452	57.9152	58.6433	1.86407	Early Cretaceous (Barremian-Aptian) fossil assemblages, Taylor, B.A., Haig, D.W., 2001. Barremian Foraminifera from the Muderong Shale, oldest marine sequence in the Cretaceous of the southern Carnarvon Basin, Western Australia. Micropaleontology 47, 125-143.			dif	D4-	Cape Range 1 drill hole, Carnarvon Basin, WA	Australia	Winning	Muderong Shale	-	black/grey carbonaceous mudstone; <1% pyrite
CR-1A	Canarvon Basin Aus.	125	1234.57	9.45803	81.2555	134.26	386.689	228.906	19.348	430.895	125	0.40919	0.109482	34.2317	0.2909		0.0431003	9.24555	105.412	90.1246	97.1188	3.38643	Late Cretaceous (Turonian) palynostratigraphy, Woodside, 2007. Well completion report THA01, THA02, THA03, THA04 Interpretative data (T/L2, Otway Basin).		corrected 11-03-2014		C4-	THA01 drill hole, Otway Basin, Tasmania	Australia	Shipwreck Ssq/Sherbrook Gp	Upper Waarre	-	banded black shale/sandstone unit with 0.5 cm diameter pyrite nodule
CR-1A	Canarvon Basin Aus.	125	464.219	56.453	89.3079	366.68	201.284	462.062	25.9588	297.208	125	5.15179	0.107219	16.136	2.24917		0.282307	7.8455	1109.75	983.324	1035	5.12687	Early Cretaceous (Barremian-Aptian) fossil assemblages, Taylor, B.A., Haig, D.W., 2001. Barremian Foraminifera from the Muderong Shale, oldest marine sequence in the Cretaceous of the southern Carnarvon Basin, Western Australia. Micropaleontology 47, 125-143.			dif	D4-	Cape Range 1 drill hole, Carnarvon Basin, WA	Australia	Winning	Muderong Shale	-	black/grey carbonaceous mudstone; <1% pyrite
CR-1A	Canarvon Basin Aus.	125	204.735	49.8805	78.247	327.196	171.071	444.904	26.6878	272.144	125	3.39053		20.2976	1.92173		0.116447	6.93382	960.983	849.393	894.632	4.79365	Early Cretaceous (Barremian-Aptian) fossil assemblages, Taylor, B.A., Haig, D.W., 2001. Barremian Foraminifera from the Muderong Shale, oldest marine sequence in the Cretaceous of the southern Carnarvon Basin, Western Australia. Micropaleontology 47, 125-143.			dif	D4-	Cape Range 1 drill hole, Carnarvon Basin, WA	Australia	Winning	Muderong Shale	-	black/grey carbonaceous mudstone; <1% pyrite
CR-1A	Canarvon Basin Aus.	125	699.564	37.1519	73.5565	339.379	190.156	352.17	27.2411	283.358	125	3.22305		18.9932	2.70218		0.354247	9.62975	978.638	858.148	904.818	4.92363	Early Cretaceous (Barremian-Aptian) fossil assemblages, Taylor, B.A., Haig, D.W., 2001. Barremian Foraminifera from the Muderong Shale, oldest marine sequence in the Cretaceous of the southern Carnarvon Basin, Western Australia. Micropaleontology 47, 125-143.			dif	D4-	Cape Range 1 drill hole, Carnarvon Basin, WA	Australia	Winning	Muderong Shale	-	black/grey carbonaceous mudstone; <1% pyrite
CR-1A	Canarvon Basin Aus.	125	329.521	59.8558	76.2743	290.38	234.554	427.138	31.751	206.853	125	1.22079		6.98248	1.0193			8.93575	455.322	413.154	426.354	6.67374	Early Cretaceous (Barremian-Aptian) fossil assemblages, Taylor, B.A., Haig, D.W., 2001. Barremian Foraminifera from the Muderong Shale, oldest marine sequence in the Cretaceous of the southern Carnarvon Basin, Western Australia. Micropaleontology 47, 125-143.			dif	D4-	Cape Range 1 drill hole, Carnarvon Basin, WA	Australia	Winning	Muderong Shale	-	black/grey carbonaceous mudstone; <1% pyrite
CR-1A	Canarvon Basin Aus.	125	670.846	12.3611	21.8665	223.346	64.8261	90.5982	32.6542	15.5624	125	0.46707		5.12515			0.0191749	4.65193	248.349	219.172	228.335	1.99478	Late Cretaceous (Turonian) palynostratigraphy, Woodside, 2007. Well completion report THA01, THA02, THA03, THA04 Interpretative data (T/L2, Otway Basin).		corrected 11-03-2014		C4-	THA01 drill hole, Otway Basin, Tasmania	Australia	Shipwreck Ssq/Sherbrook Gp	Upper Waarre	-	banded black shale/sandstone unit with 0.5 cm diameter pyrite nodule
CR-1A	Canarvon Basin Aus.	125	1392.38	56.4376	128.183	581.843	237.762	502.568	34.5776	346.05	125	5.66774	0.06408	24.3072	4.54378		0.4015	7.24687	971.388	858.173	901.918	4.72333	Early Cretaceous (Barremian-Aptian) fossil assemblages, Taylor, B.A., Haig, D.W., 2001. Barremian Foraminifera from the Muderong Shale, oldest marine sequence in the Cretaceous of the southern Carnarvon Basin, Western Australia. Micropaleontology 47, 125-143.			dif	D4-	Cape Range 1 drill hole, Carnarvon Basin, WA	Australia	Winning	Muderong Shale	-	black/grey carbonaceous mudstone; <1% pyrite
CR-1A	Canarvon Basin Aus.	125	437.272	29.7481	35.4852	180.012	153.729	220.931	40.6022	205.303	125	1.79053	0.199319	65.1305	0.666621			9.64451	287.239	267.982	244.105	5.06189	Late Cretaceous (Turonian) palynostratigraphy, Woodside, 2007. Well completion report THA01, THA02, THA03, THA04 Interpretative data (T/L2, Otway Basin).		corrected 11-03-2014		C4-	THA01 drill hole, Otway Basin, Tasmania	Australia	Shipwreck Ssq/Sherbrook Gp	Upper Waarre	-	banded black shale/sandstone unit with 0.5 cm diameter pyrite nodule
CR-1A	Canarvon Basin Aus.	125	1900.61	39.0854	54.4872	118.934	154.588	104.191	40.6224	92.4748	125	1.02957		7.9774	0.757775		0.0386715	4.79953	168.153	149.271	157.207	4.48251	Early Cretaceous (Barremian-Aptian) fossil assemblages, Taylor, B.A., Haig, D.W., 2001. Barremian Foraminifera from the Muderong Shale, oldest marine sequence in the Cretaceous of the southern Carnarvon Basin, Western Australia. Micropaleontology 47, 125-143.			dif	D4-	Cape Range 1 drill hole, Carnarvon Basin, WA	Australia	Winning	Muderong Shale	-	black/grey carbonaceous mudstone; <1% pyrite
CR-1A	Canarvon Basin Aus.	125	469.511	60.7956	110.91	293.224	311.17	361.554	56.9384	201.133	125	1.29192	0.521553	38.2373	1.4067		0.052853	9.40174	587.849	516.495	542.442	4.56473	Late Cretaceous (Turonian) palynostratigraphy, Woodside, 2007. Well completion report THA01, THA02, THA03, THA04 Interpretative data (T/L2, Otway Basin).		corrected 11-03-2014		C4-	THA01 drill hole, Otway Basin, Tasmania	Australia	Shipwreck Ssq/Sherbrook Gp	Upper Waarre	-	banded black shale/sandstone unit with 0.5 cm diameter pyrite nodule
CR-1A	Canarvon Basin Aus.	125	4763.91	15.0194	110.162	1355.39	262.327	727.68	57.8583	377.968	125	9.12033	0.328619	39.7863	11.3621		0.557273	6.58126	668.324	591.179	615.412	1.82315	Early Cretaceous (Barremian-Aptian) fossil assemblages, Taylor, B.A., Haig, D.W., 2001. Barremian Foraminifera from the Muderong Shale, oldest marine sequence in the Cretaceous of the southern Carnarvon Basin, Western Australia. Micropaleontology 47, 125-143.			dif	D4-	Cape Range 1 drill hole, Carnarvon Basin, WA	Australia	Winning	Muderong Shale	-	black/grey carbonaceous mudstone; <1% pyrite
CR-1A	Canarvon Basin Aus.	125	726.464	17.814	62.9752	476.911	89.3234	79.2016	75.0475	24.0626	125	1.71615	0.23347	6.881	0.350907		0.0168512	7.63731	216.16	190.884	199.346	3.72101	Late Cretaceous (Turonian) palynostratigraphy, Woodside, 2007. Well completion report THA01, THA02, THA03, THA04 Interpretative data (T/L2, Otway Basin).		corrected 11-03-2014		C4-	THA01 drill hole, Otway Basin, Tasmania	Australia	Shipwreck Ssq/Sherbrook Gp	Upper Waarre	-	banded black shale/sandstone unit with 0.5 cm diameter pyrite nodule
CR-1A	Canarvon Basin Aus.	125	5348.54	24.1019	168.153	1436.82	167.183	1434.18	85.397	517.069	125	11.5984	0.794919	146.798	27.3068		0.42839	18.978	434.651	406.662	415.25	2.11763
CR-1A	Canarvon Basin Aus.	125	3586.68	27.1204	132.524	1349.55	218.92	1256.76	101.182	614.164	125	14.8293	1.31544	150.662	28.5931		0.253193	19.2245	929.467	799.303	878.203	5.13019	Early Cretaceous (Barremian-Aptian) fossil assemblages, Taylor, B.A., Haig, D.W., 2001. Barremian Foraminifera from the Muderong Shale, oldest marine sequence in the Cretaceous of the southern Carnarvon Basin, Western Australia. Micropaleontology 47, 125-143.			dif	D4-	Cape Range 1 drill hole, Carnarvon Basin, WA	Australia	Winning	Muderong Shale	-	black/grey carbonaceous mudstone; <1% pyrite
LB-206	Balaklava, Ukraine	131	199.778	27.8691	47.8144	5.58751	9.19336	170.51	0.708	11.3409	131	0.015	0.360227	4.02793	0.0785	0.008	0.006	6.0187	26.0311	22.701	25.0895	0.127321	Early Cretaceous (Barremian-Aptian) fossil assemblages, Taylor, B.A., Haig, D.W., 2001. Barremian Foraminifera from the Muderong Shale, oldest marine sequence in the Cretaceous of the southern Carnarvon Basin, Western Australia. Micropaleontology 47, 125-143.			dif	D4-	Cape Range 1 drill hole, Carnarvon Basin, WA	Australia	Winning	Muderong Shale	-	black/grey carbonaceous mudstone; <1% pyrite
LB-206	Balaklava, Ukraine	131	402.4	16.7834	30.1379	9.23407	14.6465	71.5551	1.226	4.12715	131	0.0185	0.279558	1.49962	0.1245	0.008	0.0095	1.35114	12.8623	12.1199	12.6733	0.150691	Valanzhin fauna, Moiseev, A.S., 1930. Geology of South-West part of main ridge of Crymea Mountain: Data of fundamental and applied geology, 189, 1-81				K3-	SW Crimea, Balaklava depression	Ukraine	-	Novobobrovskaya	-	calcareous sediments
LB-206	Balaklava, Ukraine	131	14.1581	8.24218	19.2768	12.489	7.116	150.815	1.68526	9.21824	131	0.0654269	0.830408	4.38197	0.075	0.008	0.0055	13.7394	22.8322	20.1701	22.0152	0.0699551	Early Cretaceous (Barremian-Aptian) fossil assemblages, Taylor, B.A., Haig, D.W., 2001. Barremian Foraminifera from the Muderong Shale, oldest marine sequence in the Cretaceous of the southern Carnarvon Basin, Western Australia. Micropaleontology 47, 125-143.			dif	D4-	Cape Range 1 drill hole, Carnarvon Basin, WA	Australia	Winning	Muderong Shale	-	black/grey carbonaceous mudstone; <1% pyrite
LB-206	Balaklava, Ukraine	131	3.03684	10.4765	8.13763	0.317815	9.18898	367.952	1.98854	35.9518	131	0.0025	3.76038	6.79612	0.096787	0.008	0.001	3.92961	2.66482	2.35253	2.52584	0.0142559	Valanzhin fauna, Moiseev, A.S., 1930. Geology of South-West part of main ridge of Crymea Mountain: Data of fundamental and applied geology, 189, 1-81				K3-	SW Crimea, Balaklava depression	Ukraine	-	Novobobrovskaya	-	calcareous sediments
LB-206	Balaklava, Ukraine	131	7.08951	11.5337	9.96619	0.74551	8.99251	209.524	2.01928	25.8242	131	0.00513752	7.13821	5.63958	0.0776984	0.008	0.001	6.36461	3.21636	2.74405	2.99117	0.0303236	Valanzhin fauna, Moiseev, A.S., 1930. Geology of South-West part of main ridge of Crymea Mountain: Data of fundamental and applied geology, 189, 1-81				K3-	SW Crimea, Balaklava depression	Ukraine	-	Novobobrovskaya	-	calcareous sediments
LB-206	Balaklava, Ukraine	131	2.01989	5.30724	16.9784	2.4296	10.2945	262.407	2.04664	10.0506	131	0.0145	0.978654	9.36503	0.076	0.008	0.0055	1.78703	5.17458	4.60508	4.97237	0.0587374	Early Cretaceous (Barremian-Aptian) fossil assemblages, Taylor, B.A., Haig, D.W., 2001. Barremian Foraminifera from the Muderong Shale, oldest marine sequence in the Cretaceous of the southern Carnarvon Basin, Western Australia. Micropaleontology 47, 125-143.			dif	D4-	Cape Range 1 drill hole, Carnarvon Basin, WA	Australia	Winning	Muderong Shale	-	black/grey carbonaceous mudstone; <1% pyrite
LB-206	Balaklava, Ukraine	131	59.0352	15.1794	34.5474	14.9324	33.415	272.556	2.05072	11.3149	131	0.0457836	0.334239	4.30368	0.0725517	0.008	0.00556514	5.93382	36.2697	32.3002	35.7113	0.281076	Valanzhin fauna, Moiseev, A.S., 1930. Geology of South-West part of main ridge of Crymea Mountain: Data of fundamental and applied geology, 189, 1-81				K3-	SW Crimea, Balaklava depression	Ukraine	-	Novobobrovskaya	-	calcareous sediments
LB-206	Balaklava, Ukraine	131	122.172	52.6254	89.2934	14.133	44.465	345.1	2.05212	11.9606	131	0.0355503	1.25251	12.7394	0.0905	0.008	0.0065	5.92732	27.1667	24.4022	26.2626	0.182862	Early Cretaceous (Barremian-Aptian) fossil assemblages, Taylor, B.A., Haig, D.W., 2001. Barremian Foraminifera from the Muderong Shale, oldest marine sequence in the Cretaceous of the southern Carnarvon Basin, Western Australia. Micropaleontology 47, 125-143.			dif	D4-	Cape Range 1 drill hole, Carnarvon Basin, WA	Australia	Winning	Muderong Shale	-	black/grey carbonaceous mudstone; <1% pyrite
LB-206	Balaklava, Ukraine	131	24.5132	9.68101	13.2797	0.219938	6.457	422.061	2.18376	38.452	131	0.014	2.81844	4.06749	0.075	0.008	0.0055	3.6991	7.14926	6.38558	6.91228	0.004	Valanzhin fauna, Moiseev, A.S., 1930. Geology of South-West part of main ridge of Crymea Mountain: Data of fundamental and applied geology, 189, 1-81				K3-	SW Crimea, Balaklava depression	Ukraine	-	Novobobrovskaya	-	calcareous sediments
LB-206	Balaklava, Ukraine	131	2.62078	10.1435	24.0155	1.37855	6.61969	230.541	2.27362	53.1762	131	0.014	2.92797	5.30972	0.075	0.008	0.0055	5.08898	10.0525	9.23672	10.0274	0.0257451	Valanzhin fauna, Moiseev, A.S., 1930. Geology of South-West part of main ridge of Crymea Mountain: Data of fundamental and applied geology, 189, 1-81				K3-	SW Crimea, Balaklava depression	Ukraine	-	Novobobrovskaya	-	calcareous sediments
LB-206	Balaklava, Ukraine	131	14.2618	5.82523	17.8233	0.646121	9.36875	242.337	2.29248	23.5402	131	0.0025	3.06766	7.37389	0.0619652	0.008	0.001	3.68521	4.81948	4.35891	4.54869	0.0346698	Valanzhin fauna, Moiseev, A.S., 1930. Geology of South-West part of main ridge of Crymea Mountain: Data of fundamental and applied geology, 189, 1-81				K3-	SW Crimea, Balaklava depression	Ukraine	-	Novobobrovskaya	-	calcareous sediments
LB-206	Balaklava, Ukraine	131	10.6122	10.1823	22.9301	10.0932	19.701	197.475	2.42967	11.5346	131	0.014	0.143652	3.95186	0.187127	0.008	0.0055	6.26891	33.3541	30.0335	32.2159	0.111347	Valanzhin fauna, Moiseev, A.S., 1930. Geology of South-West part of main ridge of Crymea Mountain: Data of fundamental and applied geology, 189, 1-81				K3-	SW Crimea, Balaklava depression	Ukraine	-	Novobobrovskaya	-	calcareous sediments
LB-206	Balaklava, Ukraine	131	100.291	19.8709	46.8258	12.8248	23.3574	226.689	2.47178	12.6789	131	0.018	0.592664	6.06074	0.218934	0.008	0.007	3.64851	18.2127	16.7317	18.0006	0.181712	Early Cretaceous (Barremian-Aptian) fossil assemblages, Taylor, B.A., Haig, D.W., 2001. Barremian Foraminifera from the Muderong Shale, oldest marine sequence in the Cretaceous of the southern Carnarvon Basin, Western Australia. Micropaleontology 47, 125-143.			dif	D4-	Cape Range 1 drill hole, Carnarvon Basin, WA	Australia	Winning	Muderong Shale	-	black/grey carbonaceous mudstone; <1% pyrite
LB-206	Balaklava, Ukraine	131	3.80462	38.6386	32.8815	1.9237	12.5916	303.859	2.59153	58.2452	131	0.00994233	5.7523	5.56911	0.154253	0.008	0.001	8.20646	9.19077	8.29658	8.8776	0.0676201	Valanzhin fauna, Moiseev, A.S., 1930. Geology of South-West part of main ridge of Crymea Mountain: Data of fundamental and applied geology, 189, 1-81				K3-	SW Crimea, Balaklava depression	Ukraine	-	Novobobrovskaya	-	calcareous sediments
LB-206	Balaklava, Ukraine	131	102.247	29.9109	103.544	24.8535	30.8999	260.883	2.81612	13.1839	131	0.138944	0.40713	5.15806	0.477865	0.008	0.006	21.3171	44.2986	39.112	42.7781	0.21535	Valanzhin fauna, Moiseev, A.S., 1930. Geology of South-West part of main ridge of Crymea Mountain: Data of fundamental and applied geology, 189, 1-81				K3-	SW Crimea, Balaklava depression	Ukraine	-	Novobobrovskaya	-	calcareous sediments
LB-206	Balaklava, Ukraine	131	80.3411	26.8632	64.8915	20.8675	22.8021	293.795	2.95062	17.9141	131	0.138267	0.916172	10.1799	0.0875	0.008	0.0065	32.4694	67.4806	60.1042	65.7117	0.178767	Early Cretaceous (Barremian-Aptian) fossil assemblages, Taylor, B.A., Haig, D.W., 2001. Barremian Foraminifera from the Muderong Shale, oldest marine sequence in the Cretaceous of the southern Carnarvon Basin, Western Australia. Micropaleontology 47, 125-143.			dif	D4-	Cape Range 1 drill hole, Carnarvon Basin, WA	Australia	Winning	Muderong Shale	-	black/grey carbonaceous mudstone; <1% pyrite
LB-206	Balaklava, Ukraine	131	3.07962	21.3523	43.8406	2.23783	13.5535	237.858	3.17008	69.1669	131	0.0025	4.74593	6.86693	0.13892	0.008	0.001	4.63961	9.5109	8.76718	9.30694	0.0517704	Valanzhin fauna, Moiseev, A.S., 1930. Geology of South-West part of main ridge of Crymea Mountain: Data of fundamental and applied geology, 189, 1-81				K3-	SW Crimea, Balaklava depression	Ukraine	-	Novobobrovskaya	-	calcareous sediments
LB-206	Balaklava, Ukraine	131	86.4769	12.4955	24.861	17.9537	12.134	217.221	3.62865	12.2422	131	0.0341797	0.549535	4.51551	0.08	0.008	0.006	5.69581	60.6138	54.713	59.7536	0.175927
LB-207	Balaklava, Ukraine	131	5.4628	0.379085	20.8464	0.338283	5.82986	346.424	1.71267	19.0663	131	0.0065	1.94966	4.53917	0.0455	0.002	0.002	4.6932	2.4674	2.21298	2.36906	0.0137728	Goterivian fauna, Moiseev, A.S., 1930. Geology of South-West part of main ridge of Crymea Mountain: Data of fundamental and applied geology, 189, 1-81				K3-	SW Crimea, Balaklava depression	Ukraine	-	Novobobrovskaya	-	calcareous sediments
LB-207	Balaklava, Ukraine	131	32.606	2.86717	16.5705	5.62209	26.4914	95.6401	1.7946	15.9855	131	0.130598	2.12937	5.84538	0.139197	0.002		5.18003	9.30346	8.47359	9.61334	0.0949392	Goterivian fauna, Moiseev, A.S., 1930. Geology of South-West part of main ridge of Crymea Mountain: Data of fundamental and applied geology, 189, 1-81				K3-	SW Crimea, Balaklava depression	Ukraine	-	Novobobrovskaya	-	calcareous sediments
LB-207	Balaklava, Ukraine	131	5.84706	0.738798	25.2512	0.85728	7.6251	233.242	1.95893	25.8565	131	0.0065	1.79135	5.85416	0.048	0.002	0.002	4.53315	4.19269	3.70486	3.97821	0.0300488	Goterivian fauna, Moiseev, A.S., 1930. Geology of South-West part of main ridge of Crymea Mountain: Data of fundamental and applied geology, 189, 1-81				K3-	SW Crimea, Balaklava depression	Ukraine	-	Novobobrovskaya	-	calcareous sediments
LB-207	Balaklava, Ukraine	131	17.9036	1.55067	39.0218	0.433949	6.46894	106.955	2.10434	18.9	131	0.007	1.60718	2.91676	0.103605	0.002	0.0025	1.79522	13.3802	11.7586	12.8441	0.015127	Goterivian fauna, Moiseev, A.S., 1930. Geology of South-West part of main ridge of Crymea Mountain: Data of fundamental and applied geology, 189, 1-81				K3-	SW Crimea, Balaklava depression	Ukraine	-	Novobobrovskaya	-	calcareous sediments
LB-207	Balaklava, Ukraine	131	3.37428	0.697377	33.2625	0.578287	7.06296	651.504	2.12718	13.784	131	0.0065	3.04191	6.49713	0.0465	0.002	0.002	7.32668	3.57073	3.24886	3.48111	0.0166943	Goterivian fauna, Moiseev, A.S., 1930. Geology of South-West part of main ridge of Crymea Mountain: Data of fundamental and applied geology, 189, 1-81				K3-	SW Crimea, Balaklava depression	Ukraine	-	Novobobrovskaya	-	calcareous sediments
LB-207	Balaklava, Ukraine	131	2.58077	2.98584	33.4715	5.88637	8.68476	180.752	2.1335	26.8649	131	0.0065	1.80689	4.12651	0.112982	0.002	0.002	3.54722	9.93659	9.11403	9.6512	0.0656992	Goterivian fauna, Moiseev, A.S., 1930. Geology of South-West part of main ridge of Crymea Mountain: Data of fundamental and applied geology, 189, 1-81				K3-	SW Crimea, Balaklava depression	Ukraine	-	Novobobrovskaya	-	calcareous sediments
LB-207	Balaklava, Ukraine	131	2.3207	0.971706	43.9122	1.87191	7.30677	1678.66	2.37708	19.0853	131	0.0065	2.14392	5.5574	0.0475	0.002	0.002	6.58979	7.55482	6.83706	7.42203	0.0656761	Goterivian fauna, Moiseev, A.S., 1930. Geology of South-West part of main ridge of Crymea Mountain: Data of fundamental and applied geology, 189, 1-81				K3-	SW Crimea, Balaklava depression	Ukraine	-	Novobobrovskaya	-	calcareous sediments
LB-207	Balaklava, Ukraine	131	74.3657	2.89667	28.3144	4.01836	28.265	300.717	2.67493	35.9496	131	0.0514582	2.02601	13.6461	0.19274	0.002	0.002	7.03053	10.2228	8.99198	10.0221	0.0555077	Valanzhin fauna, Moiseev, A.S., 1930. Geology of South-West part of main ridge of Crymea Mountain: Data of fundamental and applied geology, 189, 1-81				K3-	SW Crimea, Balaklava depression	Ukraine	-	Novobobrovskaya	-	calcareous sediments
LB-207	Balaklava, Ukraine	131	80.3045	3.58527	58.503	0.876889	8.24904	1752.75	2.93989	29.334	131	0.0406191	2.89024	6.93295	0.0455	0.002	0.002	19.7135	15.6359	13.9951	14.7217	0.0166214	Valanzhin fauna, Moiseev, A.S., 1930. Geology of South-West part of main ridge of Crymea Mountain: Data of fundamental and applied geology, 189, 1-81				K3-	SW Crimea, Balaklava depression	Ukraine	-	Novobobrovskaya	-	calcareous sediments
LB-207	Balaklava, Ukraine	131	21.103	4.01238	35.0813	6.00568	22.118	273.53	3.08358	35.3151	131	0.0740042	3.03941	14.7454	0.158389	0.002	0.0025	6.30681	15.1553	13.528	14.6773	0.094983	Goterivian fauna, Moiseev, A.S., 1930. Geology of South-West part of main ridge of Crymea Mountain: Data of fundamental and applied geology, 189, 1-81				K3-	SW Crimea, Balaklava depression	Ukraine	-	Novobobrovskaya	-	calcareous sediments
LB-207	Balaklava, Ukraine	131	49.509	3.53636	29.556	13.6514	38.6496	118.63	3.32079	29.5519	131	0.211657	2.7214	21.019	0.046	0.002	0.00523744	13.6099	29.8171	26.8173	26.9788	0.0521283	Valanzhin fauna, Moiseev, A.S., 1930. Geology of South-West part of main ridge of Crymea Mountain: Data of fundamental and applied geology, 189, 1-81				K3-	SW Crimea, Balaklava depression	Ukraine	-	Novobobrovskaya	-	calcareous sediments
LB-207	Balaklava, Ukraine	131	7.82396	2.93202	61.0215	4.86914	14.2009	447.996	3.51022	27.2917	131	0.0437334	2.1286	5.91165	0.0475	0.002	0.002	7.84517	15.7681	13.6638	15.0783	0.133819	Goterivian fauna, Moiseev, A.S., 1930. Geology of South-West part of main ridge of Crymea Mountain: Data of fundamental and applied geology, 189, 1-81				K3-	SW Crimea, Balaklava depression	Ukraine	-	Novobobrovskaya	-	calcareous sediments
LB-207	Balaklava, Ukraine	131	54.5594	11.7055	65.9449	30.7764	41.4763	171.667	4.49578	27.3789	131	0.840199	2.4344	14.1306	0.305806	0.002	0.008	17.5077	27.2573	24.2301	25.7993	0.742145	Goterivian fauna, Moiseev, A.S., 1930. Geology of South-West part of main ridge of Crymea Mountain: Data of fundamental and applied geology, 189, 1-81				K3-	SW Crimea, Balaklava depression	Ukraine	-	Novobobrovskaya	-	calcareous sediments
LB-207	Balaklava, Ukraine	131	35.4165	5.9551	148.883	9.12011	63.1221	394.848	5.06402	16.288	131	0.0995012	3.72875	9.88151	0.234047	0.002	0.00984254	6.97706	20.3793	15.7727	18.1351	0.19164	Valanzhin fauna, Moiseev, A.S., 1930. Geology of South-West part of main ridge of Crymea Mountain: Data of fundamental and applied geology, 189, 1-81				K3-	SW Crimea, Balaklava depression	Ukraine	-	Novobobrovskaya	-	calcareous sediments
LB-207	Balaklava, Ukraine	131	102.487	3.84999	60.7505	12.8824	32.3743	349.623	9.0023	98.3315	131	0.18154	2.05764	51.7801	0.180098	0.002	0.00562932	14.7246	27.9528	24.356	26.5529	0.152558	Valanzhin fauna, Moiseev, A.S., 1930. Geology of South-West part of main ridge of Crymea Mountain: Data of fundamental and applied geology, 189, 1-81				K3-	SW Crimea, Balaklava depression	Ukraine	-	Novobobrovskaya	-	calcareous sediments
LB-207	Balaklava, Ukraine	131	88.4266	3.01818	75.105	18.2308	41.6569	963.53	27.6736	335.653	131	0.213477	2.17569	96.6968	0.258905	0.002	0.00987851	41.0437	20.3409	18.1509	19.6131	0.139632	Valanzhin fauna, Moiseev, A.S., 1930. Geology of South-West part of main ridge of Crymea Mountain: Data of fundamental and applied geology, 189, 1-81				K3-	SW Crimea, Balaklava depression	Ukraine	-	Novobobrovskaya	-	calcareous sediments
LB-207	Balaklava, Ukraine	131	81.3036	4.03391	85.0764	26.8552	48.6379	947.341	31.3373	271.361	131	0.218265	3.42265	141.853	0.186768	0.002	0.0290765	48.192	32.3517	29.4658	31.9203	0.241259	Valanzhin fauna, Moiseev, A.S., 1930. Geology of South-West part of main ridge of Crymea Mountain: Data of fundamental and applied geology, 189, 1-81				K3-	SW Crimea, Balaklava depression	Ukraine	-	Novobobrovskaya	-	calcareous sediments
Fortissimo1-4009.15m	Browse Basin, Aus	140	2.27454	19.1576	55.7851	15.8643	41.5384	2252.89	0.7325	40.6139	140	0.163508	0.064	0.746194	0.169	0.03	0.0095	0.0880585	27.4116	25.6817	26.3209	0.337946	Goterivian fauna, Moiseev, A.S., 1930. Geology of South-West part of main ridge of Crymea Mountain: Data of fundamental and applied geology, 189, 1-81				K3-	SW Crimea, Balaklava depression	Ukraine	-	Novobobrovskaya	-	calcareous sediments
Fortissimo1-4009.15m	Browse Basin, Aus	140	468.131	35.2403	52.7213	6.54405	22.0449	1185.08	1.61855	13.9799	140	0.014	0.0655	0.454606	0.173	0.03	0.01	0.341875	22.7773	19.637	21.8919	0.35856	Goterivian fauna, Moiseev, A.S., 1930. Geology of South-West part of main ridge of Crymea Mountain: Data of fundamental and applied geology, 189, 1-81				K3-	SW Crimea, Balaklava depression	Ukraine	-	Novobobrovskaya	-	calcareous sediments
Fortissimo1-4009.15m	Browse Basin, Aus	140	105.993	60.5523	151.931	81.7359	35.8749	147.243	1.77862	23.3422	140	0.751515	0.067	1.01331	0.177	0.03	0.01	0.253124	97.734	85.6509	94.0125	2.04912	Goterivian fauna, Moiseev, A.S., 1930. Geology of South-West part of main ridge of Crymea Mountain: Data of fundamental and applied geology, 189, 1-81				K3-	SW Crimea, Balaklava depression	Ukraine	-	Novobobrovskaya	-	calcareous sediments
Fortissimo1-4009.15m	Browse Basin, Aus	140	221.795	41.7995	321.738	61.0914	34.3136	97.245	3.16326	8.72369	140	1.15152	0.0655	1.92266	0.353982	0.03	0.01	1.44731	103.332	85.9128	92.1596	0.158236		http://www.petroleum-acreage.gov.au/2014/release-areas-and-geology/browse-basin/caswell-sub-basin			I5-	Browse Basin, Caswell sub-basin	Australia				black shale, Py <2% forms single disseminated and framboidal nodule 3mm
Fortissimo1-4009.15m	Browse Basin, Aus	140	628.473	35.5469	351.357	176.926	137.884	57.7791	3.28174	8.88381	140	1.44531	0.092	3.3372	0.2425	0.03	0.0545405	0.882848	109.883	102.572	115.215	1.74608		http://www.petroleum-acreage.gov.au/2014/release-areas-and-geology/browse-basin/caswell-sub-basin			I5-	Browse Basin, Caswell sub-basin	Australia				black shale, Py <2% forms single disseminated and framboidal nodule 3mm
Fortissimo1-4009.15m	Browse Basin, Aus	140	363.448	57.6636	342.371	92.7722	57.3822	113.54	3.67041	9.19813	140	1.40156	0.066	2.63906	0.774088	0.03	0.01	1.37995	153.977	138.492	146.035	0.873731		http://www.petroleum-acreage.gov.au/2014/release-areas-and-geology/browse-basin/caswell-sub-basin			I5-	Browse Basin, Caswell sub-basin	Australia				black shale, Py <2% forms single disseminated and framboidal nodule 3mm
Fortissimo1-4009.15m	Browse Basin, Aus	140	66.7724	29.9772	152.956	43.5964	475.087	828.242	4.43366	5.29573	140	1.11114	0.137117	0.787735	0.17	0.03	0.0095	0.706734	47.034	40.7372	45.5994	0.483032		http://www.petroleum-acreage.gov.au/2014/release-areas-and-geology/browse-basin/caswell-sub-basin			I5-	Browse Basin, Caswell sub-basin	Australia				black shale, Py <2% forms single disseminated and framboidal nodule 3mm
Fortissimo1-4009.15m	Browse Basin, Aus	140	7.31011	46.2725	576.241	96.966	7.55707	249.117	4.70898	12.9811	140	3.51026	0.065	3.14592	0.1715	0.03	0.0095	13.4108	1.72657	1.68435	1.53307	0.0085		http://www.petroleum-acreage.gov.au/2014/release-areas-and-geology/browse-basin/caswell-sub-basin			I5-	Browse Basin, Caswell sub-basin	Australia				black shale, Py <2% forms single disseminated and framboidal nodule 3mm
Fortissimo1-4009.15m	Browse Basin, Aus	140	6.06688	42.4935	505.616	92.8998	7.21822	128.32	4.71484	5.77645	140	2.53588	0.0655	2.3049	0.173	0.03	0.01	11.9616	22.3108	18.9132	20.4205	0.009		http://www.petroleum-acreage.gov.au/2014/release-areas-and-geology/browse-basin/caswell-sub-basin			I5-	Browse Basin, Caswell sub-basin	Australia				black shale, Py <2% forms single disseminated and framboidal nodule 3mm
Fortissimo1-4009.15m	Browse Basin, Aus	140	586.543	50.2878	349.889	67.3831	56.882	115.948	4.81427	9.50282	140	1.47688	0.065	3.05135	0.37065	0.03	0.0095	1.61362	100.521	89.5686	96.1626	0.0465186		http://www.petroleum-acreage.gov.au/2014/release-areas-and-geology/browse-basin/caswell-sub-basin			I5-	Browse Basin, Caswell sub-basin	Australia				black shale, Py <2% forms single disseminated and framboidal nodule 3mm
Fortissimo1-4009.15m	Browse Basin, Aus	140	4.34418	56.3433	606.125	105.889	7.60243	160.096	4.88793	7.76918	140	3.43534	0.065	3.00031	0.1715	0.03	0.0095	15.9036	17.8532	15.4228	17.2978	0.0085	Goterivian fauna, Moiseev, A.S., 1930. Geology of South-West part of main ridge of Crymea Mountain: Data of fundamental and applied geology, 189, 1-81				K3-	SW Crimea, Balaklava depression	Ukraine	-	Novobobrovskaya	-	calcareous sediments
Fortissimo1-4009.15m	Browse Basin, Aus	140	428.287	55.5631	422.455	84.4091	57.2343	122.652	5.10181	9.00315	140	1.65082	0.186305	2.95136	0.434966	0.03	0.01	1.80952	140.528	125.047	137.346	0.149731		http://www.petroleum-acreage.gov.au/2014/release-areas-and-geology/browse-basin/caswell-sub-basin			I5-	Browse Basin, Caswell sub-basin	Australia				black shale, Py <2% forms single disseminated and framboidal nodule 3mm
Fortissimo1-4009.15m	Browse Basin, Aus	140	600.589	66.7502	381.651	80.201	66.7183	134.359	5.12447	10.1174	140	1.5747	0.136124	3.69516	0.520256	0.03	0.0252085	1.37716	148.115	124.534	137.404	0.408288		http://www.petroleum-acreage.gov.au/2014/release-areas-and-geology/browse-basin/caswell-sub-basin			I5-	Browse Basin, Caswell sub-basin	Australia				black shale, Py <2% forms single disseminated and framboidal nodule 3mm
Fortissimo1-4009.15m	Browse Basin, Aus	140	760.71	110.368	431.354	93.3995	98.6444	155.387	5.58258	9.49471	140	1.716	0.068	4.7286	0.562949	0.03	0.01	1.31438	294.89	257.08	275.014	0.722213		http://www.petroleum-acreage.gov.au/2014/release-areas-and-geology/browse-basin/caswell-sub-basin			I5-	Browse Basin, Caswell sub-basin	Australia				black shale, Py <2% forms single disseminated and framboidal nodule 3mm
Fortissimo1-4009.15m	Browse Basin, Aus	140	770.944	44.0823	327.471	135.924	119.429	48.1093	5.64806	8.19286	140	1.12634	0.0695	2.91527	0.380115	0.03	0.0105	0.545783	64.524	55.9241	61.7515	1.11555		http://www.petroleum-acreage.gov.au/2014/release-areas-and-geology/browse-basin/caswell-sub-basin			I5-	Browse Basin, Caswell sub-basin	Australia				black shale, Py <2% forms single disseminated and framboidal nodule 3mm
Fortissimo1-4009.15m	Browse Basin, Aus	140	2.97851	29.0661	286.618	56.3722	5.40889	95.2051	6.04312	5.43511	140	1.68795	0.065	1.65985	0.171	0.03	0.0095	6.7193	3.55396	3.25253	3.42195	0.0085	Goterivian fauna, Moiseev, A.S., 1930. Geology of South-West part of main ridge of Crymea Mountain: Data of fundamental and applied geology, 189, 1-81				K3-	SW Crimea, Balaklava depression	Ukraine	-	Novobobrovskaya	-	calcareous sediments
Fortissimo1-4009.15m	Browse Basin, Aus	140	840.48	85.7344	358.318	66.6004	85.1168	168.968	6.16001	8.62892	140	0.882432	0.190252	4.87084	0.428081	0.03	0.0095	0.758701	227.678	194.41	212.597	0.152928		http://www.petroleum-acreage.gov.au/2014/release-areas-and-geology/browse-basin/caswell-sub-basin			I5-	Browse Basin, Caswell sub-basin	Australia				black shale, Py <2% forms single disseminated and framboidal nodule 3mm
Fortissimo1-4009.15m	Browse Basin, Aus	140	3.8511	100.1	739.297	103.59	6.3004	199.509	7.02545	7.92623	140	1.62372	0.0645	4.90714	0.17	0.03	0.0095	4.81655	278.711	235.068	258.31	0.0085		http://www.petroleum-acreage.gov.au/2014/release-areas-and-geology/browse-basin/caswell-sub-basin			I5-	Browse Basin, Caswell sub-basin	Australia				black shale, Py <2% forms single disseminated and framboidal nodule 3mm
Fortissimo1-4009.15m	Browse Basin, Aus	140	253.32	40.6478	159.253	62.4675	65.3751	50.4875	7.83458	7.75445	140	0.631625	0.0655	3.00682	0.346786	0.03	0.01	0.35996	72.5791	63.8135	70.0193	0.367692		http://www.petroleum-acreage.gov.au/2014/release-areas-and-geology/browse-basin/caswell-sub-basin			I5-	Browse Basin, Caswell sub-basin	Australia				black shale, Py <2% forms single disseminated and framboidal nodule 3mm
Fortissimo1-4009.15m	Browse Basin, Aus	140	4.37255	67.6544	410.487	70.2891	7.23896	210.019	8.62574	10.367	140	1.70857	0.161914	3.80896	0.17	0.03	0.0095	6.28547	35.1231	30.0611	33.0891	0.0085
Fortissimo1-4009.15m	Browse Basin, Aus	140	470	39.6417	162.667	154.376	102.598	69.4243	8.66027	9.09298	140	0.588247	0.082	5.33473	0.805401	0.03	0.0332727	0.70306	154.796	133.438	148.291	2.36216		http://www.petroleum-acreage.gov.au/2014/release-areas-and-geology/browse-basin/caswell-sub-basin			I5-	Browse Basin, Caswell sub-basin	Australia				black shale, Py <2% forms single disseminated and framboidal nodule 3mm
Fortissimo1-4009.15m	Browse Basin, Aus	140	754.133	37.872	223.82	191.157	144.634	84.5016	9.67903	9.96657	140	2.4804	0.0735	5.08089	0.69919	0.03	0.011	0.662278	155.948	149.074	152.356	2.41171		http://www.petroleum-acreage.gov.au/2014/release-areas-and-geology/browse-basin/caswell-sub-basin			I5-	Browse Basin, Caswell sub-basin	Australia				black shale, Py <2% forms single disseminated and framboidal nodule 3mm
Fortissimo1-4009.15m	Browse Basin, Aus	140	678.615	38.3995	268.74	145.339	126.997	70.7391	10.1607	9.50918	140	1.28062	0.0875	5.03524	0.669583	0.03	0.0616073	0.843224	132.068	117.793	132.043	1.51627
Fortissimo1-4009.15m	Browse Basin, Aus	140	29.361	63.5928	191.597	57.917	39.3749	173.393	13.7976	6.34423	140	0.877118	0.065	1.9797	0.790567	0.03	0.0095	0.846023	122.584	104.92	115.819	1.05038		http://www.petroleum-acreage.gov.au/2014/release-areas-and-geology/browse-basin/caswell-sub-basin			I5-	Browse Basin, Caswell sub-basin	Australia				black shale, Py <2% forms single disseminated and framboidal nodule 3mm
Fortissimo1-4009.15m	Browse Basin, Aus	140	546.539	581.438	1084.13	353.861	69.7171	383.028	20.5281	10.8564	140	1.28076	0.071	11.0494	1.51954	0.03	0.0105	1.18246	1029.77	901.366	975.43	9.29479	Goterivian fauna, Moiseev, A.S., 1930. Geology of South-West part of main ridge of Crymea Mountain: Data of fundamental and applied geology, 189, 1-81				K3-	SW Crimea, Balaklava depression	Ukraine	-	Novobobrovskaya	-	calcareous sediments
Fortissimo1-4009.15m	Browse Basin, Aus	140	377.327	13.4702	156.353	91.4882	66.583	221.321	22.7949	31.4661	140	1.89595	0.0645	7.10708	0.420523	0.03	0.022913	1.23233	76.8351	64.1928	69.4784	1.51081	Goterivian fauna, Moiseev, A.S., 1930. Geology of South-West part of main ridge of Crymea Mountain: Data of fundamental and applied geology, 189, 1-81				K3-	SW Crimea, Balaklava depression	Ukraine	-	Novobobrovskaya	-	calcareous sediments
Fortissimo1-4129.7m	Browse Basin, Aus	145	12.795	52.968	185.604	22.6444	31.5984	267.783	0.81	4.36997	145	2.202	0.076	1.17346	0.45942	0.0345	0.0226485	2.81867	79.7337	69.9055	80.8972	2.67842		http://www.petroleum-acreage.gov.au/2014/release-areas-and-geology/browse-basin/caswell-sub-basin			I5-	Browse Basin, Caswell sub-basin	Australia				black shale, Py <2% forms single disseminated and framboidal nodule 3mm
Fortissimo1-4129.7m	Browse Basin, Aus	145	2.99493	43.2919	150.185	18.2118	29.7338	307.688	1.57323	5.22019	145	1.89558	0.0725	1.36682	0.450799	0.0345	0.0105	1.85061	58.8183	52.5288	57.0829	1.94975		http://www.petroleum-acreage.gov.au/2014/release-areas-and-geology/browse-basin/caswell-sub-basin			I5-	Browse Basin, Caswell sub-basin	Australia				black shale, Py <2% forms single disseminated and framboidal nodule 3mm
Fortissimo1-4129.7m	Browse Basin, Aus	145	294.601	90.7682	512.39	57.9979	8.96364	21.4777	1.62768	9.44116	145	9.77187	0.0725	0.35757	0.1625	0.0345	0.0408259	12.2726	36.9047	32.8006	35.6381	0.0075	Stilwell et al., 2001	http://www.petroleum-acreage.gov.au/2014/release-areas-and-geology/browse-basin/caswell-sub-basin	Stilwell, J. D., Dixon, M., Lehner, B., & Gamarra, S. (2011). Jurassic–Cretaceous Boundary Ammonite Blanfordiceras (Mollusca: Cephalopoda) from Fortissimo-1 Wildcat Well, Browse Basin, Northwest Shelf, Australia. Journal of Paleontology, 85(3), 549–552. doi:10.1666/10-073.1		I5-	Browse Basin, Caswell sub-basin	Australia				black shale, Py <2% forms single disseminated and framboidal nodule 3mm
Fortissimo1-4129.7m	Browse Basin, Aus	145	37.0282	79.9114	256.61	52.0535	28.4195	124.856	2.65034	10.2593	145	4.69224	0.0915	1.87066	0.608387	0.0345	0.013	1.20246	105.139	93.7758	99.3633	7.41476		http://www.petroleum-acreage.gov.au/2014/release-areas-and-geology/browse-basin/caswell-sub-basin			I5-	Browse Basin, Caswell sub-basin	Australia				black shale, Py <2% forms single disseminated and framboidal nodule 3mm
Fortissimo1-4129.7m	Browse Basin, Aus	145	111.643	208.373	462.359	87.5845	9.17632	69.5754	3.69787	2.37475	145	7.07507	0.076	1.93147	0.171	0.0345	0.0491712	4.5055	191.74	174.728	188.414	0.095182		http://www.petroleum-acreage.gov.au/2014/release-areas-and-geology/browse-basin/caswell-sub-basin			I5-	Browse Basin, Caswell sub-basin	Australia				black shale, Py <2% forms single disseminated and framboidal nodule 3mm
Fortissimo1-4129.7m	Browse Basin, Aus	145	1.02943	130.029	369.102	41.9135	35.1151	859.649	3.93402	2.0749	145	1.41558	0.076	4.01534	1.35249	0.0345	0.011	0.84259	214.833	185.736	202.917	7.25946		http://www.petroleum-acreage.gov.au/2014/release-areas-and-geology/browse-basin/caswell-sub-basin			I5-	Browse Basin, Caswell sub-basin	Australia				black shale, Py <2% forms single disseminated and framboidal nodule 3mm
Fortissimo1-4129.7m	Browse Basin, Aus	145	217.952	238.939	779.712	88.0066	8.88518	53.82	4.30078	17.0181	145	10.194	0.075	0.915461	0.168	0.0345	0.0668033	4.05674	124.785	116.025	121.119	0.0355959
Fortissimo1-4129.7m	Browse Basin, Aus	145	36.6379	135.913	512.526	44.1243	9.66887	111.183	4.87915	4.05815	145	3.33946	0.0735	3.37728	0.1655	0.0345	0.0105	3.59725	278.867	250.54	268.351	0.121979		http://www.petroleum-acreage.gov.au/2014/release-areas-and-geology/browse-basin/caswell-sub-basin			I5-	Browse Basin, Caswell sub-basin	Australia				black shale, Py <2% forms single disseminated and framboidal nodule 3mm
Fortissimo1-4129.7m	Browse Basin, Aus	145	67.7606	225.04	520.398	92.8923	19.3137	176.489	5.37916	12.3756	145	3.2951	0.0885	3.6363	0.1985	0.0345	0.0125	2.08875	327.776	300.045	323.57	0.157536	Stilwell et al., 2007	http://www.petroleum-acreage.gov.au/2014/release-areas-and-geology/browse-basin/caswell-sub-basin	Stilwell, J. D., Dixon, M., Lehner, B., & Gamarra, S. (2011). Jurassic–Cretaceous Boundary Ammonite Blanfordiceras (Mollusca: Cephalopoda) from Fortissimo-1 Wildcat Well, Browse Basin, Northwest Shelf, Australia. Journal of Paleontology, 85(3), 549–552. doi:10.1666/10-073.1		I5-	Browse Basin, Caswell sub-basin	Australia				black shale, Py <2% forms single disseminated and framboidal nodule 3mm
Fortissimo1-4129.7m	Browse Basin, Aus	145	20.2855	216.381	824.67	91.1232	18.1291	211.823	5.6882	11.3479	145	3.82296	0.0745	4.12119	0.376374	0.0345	0.0649591	3.66497	394.206	363.251	384.679	0.14265	Stilwell et al., 2004	http://www.petroleum-acreage.gov.au/2014/release-areas-and-geology/browse-basin/caswell-sub-basin	Stilwell, J. D., Dixon, M., Lehner, B., & Gamarra, S. (2011). Jurassic–Cretaceous Boundary Ammonite Blanfordiceras (Mollusca: Cephalopoda) from Fortissimo-1 Wildcat Well, Browse Basin, Northwest Shelf, Australia. Journal of Paleontology, 85(3), 549–552. doi:10.1666/10-073.1		I5-	Browse Basin, Caswell sub-basin	Australia				black shale, Py <2% forms single disseminated and framboidal nodule 3mm
Fortissimo1-4129.7m	Browse Basin, Aus	145	162.508	134.326	488.063	74.5611	17.6024	141.689	6.01253	15.6691	145	2.38417	0.0745	3.62201	0.58974	0.0345	0.0388114	1.75215	306.842	275.293	294.957	0.106464	Stilwell et al., 2003	http://www.petroleum-acreage.gov.au/2014/release-areas-and-geology/browse-basin/caswell-sub-basin	Stilwell, J. D., Dixon, M., Lehner, B., & Gamarra, S. (2011). Jurassic–Cretaceous Boundary Ammonite Blanfordiceras (Mollusca: Cephalopoda) from Fortissimo-1 Wildcat Well, Browse Basin, Northwest Shelf, Australia. Journal of Paleontology, 85(3), 549–552. doi:10.1666/10-073.1		I5-	Browse Basin, Caswell sub-basin	Australia				black shale, Py <2% forms single disseminated and framboidal nodule 3mm
Fortissimo1-4129.7m	Browse Basin, Aus	145	133.436	219.196	526.992	96.6501	42.2455	447.596	6.0714	6.78687	145	5.94832	0.098	5.73491	0.936147	0.0345	0.037779	2.26067	369.778	308.684	354.904	14.7008		http://www.petroleum-acreage.gov.au/2014/release-areas-and-geology/browse-basin/caswell-sub-basin			I5-	Browse Basin, Caswell sub-basin	Australia				black shale, Py <2% forms single disseminated and framboidal nodule 3mm
Fortissimo1-4129.7m	Browse Basin, Aus	145	32.7387	254.629	536.824	62.9739	13.6122	243.178	6.89142	6.81337	145	2.27268	0.0735	8.30728	0.502453	0.0345	0.0222319	1.22287	321.628	287.754	313.757	0.44825		http://www.petroleum-acreage.gov.au/2014/release-areas-and-geology/browse-basin/caswell-sub-basin			I5-	Browse Basin, Caswell sub-basin	Australia				black shale, Py <2% forms single disseminated and framboidal nodule 3mm
Fortissimo1-4129.7m	Browse Basin, Aus	145	121.283	347.756	684.203	114.94	12.7613	171.973	7.2328	5.22553	145	6.48721	0.0825	5.11752	0.186	0.0345	0.0115	4.41124	379.886	343.47	371.266	0.152184		http://www.petroleum-acreage.gov.au/2014/release-areas-and-geology/browse-basin/caswell-sub-basin			I5-	Browse Basin, Caswell sub-basin	Australia				black shale, Py <2% forms single disseminated and framboidal nodule 3mm
Fortissimo1-4129.7m	Browse Basin, Aus	145	36.9098	317.226	488.516	62.903	11.6698	251.045	7.35353	7.46859	145	1.71205	0.073	7.84748	0.411608	0.0345	0.0215096	0.59919	271.996	240.55	260.848	0.303092	Stilwell et al., 2002	http://www.petroleum-acreage.gov.au/2014/release-areas-and-geology/browse-basin/caswell-sub-basin	Stilwell, J. D., Dixon, M., Lehner, B., & Gamarra, S. (2011). Jurassic–Cretaceous Boundary Ammonite Blanfordiceras (Mollusca: Cephalopoda) from Fortissimo-1 Wildcat Well, Browse Basin, Northwest Shelf, Australia. Journal of Paleontology, 85(3), 549–552. doi:10.1666/10-073.1		I5-	Browse Basin, Caswell sub-basin	Australia				black shale, Py <2% forms single disseminated and framboidal nodule 3mm
Fortissimo1-4129.7m	Browse Basin, Aus	145	14.22	302.762	697.141	95.4992	22.3748	289.327	11.3008	11.1355	145	2.77523	0.0775	8.61201	0.44359	0.0345	0.0324673	1.56621	404.696	380.874	401.884	0.341843	Stilwell et al., 2006	http://www.petroleum-acreage.gov.au/2014/release-areas-and-geology/browse-basin/caswell-sub-basin	Stilwell, J. D., Dixon, M., Lehner, B., & Gamarra, S. (2011). Jurassic–Cretaceous Boundary Ammonite Blanfordiceras (Mollusca: Cephalopoda) from Fortissimo-1 Wildcat Well, Browse Basin, Northwest Shelf, Australia. Journal of Paleontology, 85(3), 549–552. doi:10.1666/10-073.1		I5-	Browse Basin, Caswell sub-basin	Australia				black shale, Py <2% forms single disseminated and framboidal nodule 3mm
TM-12-21-A	Volga basin Russia	169	19.8125	40.9329	24.5707	3.97682	4.79583	1703.92	1.0226	33.12	169	0.0215616	0.21881	2.33676				2.88314	4.15982	3.79272	3.87567	0.0748826	Stilwell et al., 2013	http://www.petroleum-acreage.gov.au/2014/release-areas-and-geology/browse-basin/caswell-sub-basin	Stilwell, J. D., Dixon, M., Lehner, B., & Gamarra, S. (2011). Jurassic–Cretaceous Boundary Ammonite Blanfordiceras (Mollusca: Cephalopoda) from Fortissimo-1 Wildcat Well, Browse Basin, Northwest Shelf, Australia. Journal of Paleontology, 85(3), 549–552. doi:10.1666/10-073.1		I5-	Browse Basin, Caswell sub-basin	Australia				black shale, Py <2% forms single disseminated and framboidal nodule 3mm
TM-12-21-A	Volga basin Russia	169	288.115	160.703	69.4231	11.2823	14.5407	1706.72	1.70961	19.0378	169	0.0223718	0.85169	14.0815	0.133611		0.0094446	6.67211	35.2159	30.2587	32.4293	0.0968494	Middle Jurassic (Bajocian) ammonite assemblages, Mitta, V.V., 2003. On the Callovian-Oxfordian boundary beds of the Volga basin. Vernadski Museum-Novitates (in Russian) 11, 1-21, Kostyleva, V.V., Mitta, V.V., 2011. Middle Jurassic stratigraphy and sedimentary environments in Tarkhanovskaya Pristan’locality, Tatarstan, in: Zakharov, V.A., Rogov, M.A., Ippolitov, A.P. (Eds.), Jurassic System of Rus…			A	H4-	Volga River, Bolshie Tarhany, Kazan	Russia	-	-	-	pyritised belemnite
TM-12-21-A	Volga basin Russia	169	14.2515	95.7978	31.1463	5.37071	5.41928	2675.77	2.42682	28.2802	169	0.0325591	0.687205	4.92483	0.102397			6.26378	7.28447	6.40661	6.68303	0.0750269	Stilwell et al., 2010	http://www.petroleum-acreage.gov.au/2014/release-areas-and-geology/browse-basin/caswell-sub-basin	Stilwell, J. D., Dixon, M., Lehner, B., & Gamarra, S. (2011). Jurassic–Cretaceous Boundary Ammonite Blanfordiceras (Mollusca: Cephalopoda) from Fortissimo-1 Wildcat Well, Browse Basin, Northwest Shelf, Australia. Journal of Paleontology, 85(3), 549–552. doi:10.1666/10-073.1		I5-	Browse Basin, Caswell sub-basin	Australia				black shale, Py <2% forms single disseminated and framboidal nodule 3mm
TM-12-21-A	Volga basin Russia	169	9.10026	205.057	63.2247	6.53916	3.68759	1695.61	2.50917	15.2597	169	0.0196879	1.45578	9.06596			0.00817613	10.0265	5.74939	5.45955	5.41736	0.0512067	Stilwell et al., 2014	http://www.petroleum-acreage.gov.au/2014/release-areas-and-geology/browse-basin/caswell-sub-basin	Stilwell, J. D., Dixon, M., Lehner, B., & Gamarra, S. (2011). Jurassic–Cretaceous Boundary Ammonite Blanfordiceras (Mollusca: Cephalopoda) from Fortissimo-1 Wildcat Well, Browse Basin, Northwest Shelf, Australia. Journal of Paleontology, 85(3), 549–552. doi:10.1666/10-073.1		I5-	Browse Basin, Caswell sub-basin	Australia				black shale, Py <2% forms single disseminated and framboidal nodule 3mm
TM-12-21-A	Volga basin Russia	169	10.5074	214.574	80.5631	6.28565	11.7332	2558.14	2.65703	17.7671	169		1.67972	10.0517	0.0691756		0.00635193	14.3233	11.9655	10.7624	11.2063	0.0384083	Middle Jurassic (Bajocian) ammonite assemblages, Mitta, V.V., 2003. On the Callovian-Oxfordian boundary beds of the Volga basin. Vernadski Museum-Novitates (in Russian) 11, 1-21, Kostyleva, V.V., Mitta, V.V., 2011. Middle Jurassic stratigraphy and sedimentary environments in Tarkhanovskaya Pristan’locality, Tatarstan, in: Zakharov, V.A., Rogov, M.A., Ippolitov, A.P. (Eds.), Jurassic System of Rus…			A	H4-	Volga River, Bolshie Tarhany, Kazan	Russia	-	-	-	pyritised belemnite
TM-12-21-A	Volga basin Russia	169	19.0623	104.318	31.4142	5.19663	12.2741	2664.96	2.77377	26.5942	169	0.0223723	0.608018	4.32071	0.107525			5.33148	1.93987	1.72882	1.84027	0.029453	Stilwell et al., 2008	http://www.petroleum-acreage.gov.au/2014/release-areas-and-geology/browse-basin/caswell-sub-basin	Stilwell, J. D., Dixon, M., Lehner, B., & Gamarra, S. (2011). Jurassic–Cretaceous Boundary Ammonite Blanfordiceras (Mollusca: Cephalopoda) from Fortissimo-1 Wildcat Well, Browse Basin, Northwest Shelf, Australia. Journal of Paleontology, 85(3), 549–552. doi:10.1666/10-073.1		I5-	Browse Basin, Caswell sub-basin	Australia				black shale, Py <2% forms single disseminated and framboidal nodule 3mm
TM-12-21-A	Volga basin Russia	169	14.4075	215.359	127.39	3.72309	6.47522	2054.57	2.90313	18.5589	169	0.0206056	1.21977	6.80903	0.075718		0.00437456	11.7463	10.0568	8.63717	9.30411	0.03622	Stilwell et al., 2016	http://www.petroleum-acreage.gov.au/2014/release-areas-and-geology/browse-basin/caswell-sub-basin	Stilwell, J. D., Dixon, M., Lehner, B., & Gamarra, S. (2011). Jurassic–Cretaceous Boundary Ammonite Blanfordiceras (Mollusca: Cephalopoda) from Fortissimo-1 Wildcat Well, Browse Basin, Northwest Shelf, Australia. Journal of Paleontology, 85(3), 549–552. doi:10.1666/10-073.1		I5-	Browse Basin, Caswell sub-basin	Australia				black shale, Py <2% forms single disseminated and framboidal nodule 3mm
TM-12-21-A	Volga basin Russia	169	9.42386	224.068	68.3337	7.13149	3.66335	1752.25	3.08017	16.8225	169	0.0279945	1.38654	9.22704	0.107726		0.00994342	10.2571	6.7628	5.81972	6.0251	0.0607517	Stilwell et al., 2012	http://www.petroleum-acreage.gov.au/2014/release-areas-and-geology/browse-basin/caswell-sub-basin	Stilwell, J. D., Dixon, M., Lehner, B., & Gamarra, S. (2011). Jurassic–Cretaceous Boundary Ammonite Blanfordiceras (Mollusca: Cephalopoda) from Fortissimo-1 Wildcat Well, Browse Basin, Northwest Shelf, Australia. Journal of Paleontology, 85(3), 549–552. doi:10.1666/10-073.1		I5-	Browse Basin, Caswell sub-basin	Australia				black shale, Py <2% forms single disseminated and framboidal nodule 3mm
TM-12-21-A	Volga basin Russia	169	13.8425	123.099	44.7847	27.6316	4.69917	2685.9	3.11289	30.0801	169	0.0524733	1.42477	8.10975	0.186879		0.0114387	9.1272	13.5862	12.0982	12.602	0.139953	Stilwell et al., 2011	http://www.petroleum-acreage.gov.au/2014/release-areas-and-geology/browse-basin/caswell-sub-basin	Stilwell, J. D., Dixon, M., Lehner, B., & Gamarra, S. (2011). Jurassic–Cretaceous Boundary Ammonite Blanfordiceras (Mollusca: Cephalopoda) from Fortissimo-1 Wildcat Well, Browse Basin, Northwest Shelf, Australia. Journal of Paleontology, 85(3), 549–552. doi:10.1666/10-073.1		I5-	Browse Basin, Caswell sub-basin	Australia				black shale, Py <2% forms single disseminated and framboidal nodule 3mm
TM-12-21-A	Volga basin Russia	169	10.7495	240.305	172.621	10.1547	11.0647	1642.14	3.24067	16.2497	169	0.0286406	1.33918	9.43349	0.0962982		0.0109245	11.4208	13.9972	12.3066	13.3369	0.0671858	Stilwell et al., 2017	http://www.petroleum-acreage.gov.au/2014/release-areas-and-geology/browse-basin/caswell-sub-basin	Stilwell, J. D., Dixon, M., Lehner, B., & Gamarra, S. (2011). Jurassic–Cretaceous Boundary Ammonite Blanfordiceras (Mollusca: Cephalopoda) from Fortissimo-1 Wildcat Well, Browse Basin, Northwest Shelf, Australia. Journal of Paleontology, 85(3), 549–552. doi:10.1666/10-073.1		I5-	Browse Basin, Caswell sub-basin	Australia				black shale, Py <2% forms single disseminated and framboidal nodule 3mm
TM-12-21-A	Volga basin Russia	169	9.43602	156.584	41.6225	9.83635	4.13146	2154.68	3.43455	16.1629	169	0.0243378	1.52567	7.76854				9.03832	7.29933	6.12338	6.48441	0.100633	Stilwell et al., 2009	http://www.petroleum-acreage.gov.au/2014/release-areas-and-geology/browse-basin/caswell-sub-basin	Stilwell, J. D., Dixon, M., Lehner, B., & Gamarra, S. (2011). Jurassic–Cretaceous Boundary Ammonite Blanfordiceras (Mollusca: Cephalopoda) from Fortissimo-1 Wildcat Well, Browse Basin, Northwest Shelf, Australia. Journal of Paleontology, 85(3), 549–552. doi:10.1666/10-073.1		I5-	Browse Basin, Caswell sub-basin	Australia				black shale, Py <2% forms single disseminated and framboidal nodule 3mm
TM-12-21-A	Volga basin Russia	169	32.6379	52.6205	40.7989	16.3527	8.41811	2265.52	3.54883	35.2992	169		0.526321	4.85637	0.0871412		0.00633463	4.84915	12.5288	11.1677	11.632	0.080221
TM-12-21-A	Volga basin Russia	169	14.0926	324.22	268.132	6.78755	5.72904	2231.66	4.16454	19.2894	169	0.0266804	1.64752	10.2386	0.113459		0.00659048	14.7848	12.149	10.5288	11.6886	0.0441217	Stilwell et al., 2018	http://www.petroleum-acreage.gov.au/2014/release-areas-and-geology/browse-basin/caswell-sub-basin	Stilwell, J. D., Dixon, M., Lehner, B., & Gamarra, S. (2011). Jurassic–Cretaceous Boundary Ammonite Blanfordiceras (Mollusca: Cephalopoda) from Fortissimo-1 Wildcat Well, Browse Basin, Northwest Shelf, Australia. Journal of Paleontology, 85(3), 549–552. doi:10.1666/10-073.1		I5-	Browse Basin, Caswell sub-basin	Australia				black shale, Py <2% forms single disseminated and framboidal nodule 3mm
TM-12-25	Volga basin Russia	169	3.04868	75.7734	807.987	0.788714	3.09201	550.17	1.04653	7.59285	169	0.00482199	6.06773	57.6094				16.4491	53.6289	47.7063	49.1687		Middle Jurassic (Bajocian) ammonite assemblages, Mitta, V.V., 2003. On the Callovian-Oxfordian boundary beds of the Volga basin. Vernadski Museum-Novitates (in Russian) 11, 1-21, Kostyleva, V.V., Mitta, V.V., 2011. Middle Jurassic stratigraphy and sedimentary environments in Tarkhanovskaya Pristan’locality, Tatarstan, in: Zakharov, V.A., Rogov, M.A., Ippolitov, A.P. (Eds.), Jurassic System of Rus…			A	H4-	Volga River, Bolshie Tarhany, Kazan	Russia	-	-	-	pyritised belemnite
TM-12-25	Volga basin Russia	169	2.76455	67.1861	585.671	1.9537	1.84013	517.451	1.10429	5.92951	169	0.00747707	6.49583	50.2316				17.1194	66.6075	58.6258	61.582		Middle Jurassic (Bajocian) ammonite assemblages, Mitta, V.V., 2003. On the Callovian-Oxfordian boundary beds of the Volga basin. Vernadski Museum-Novitates (in Russian) 11, 1-21, Kostyleva, V.V., Mitta, V.V., 2011. Middle Jurassic stratigraphy and sedimentary environments in Tarkhanovskaya Pristan’locality, Tatarstan, in: Zakharov, V.A., Rogov, M.A., Ippolitov, A.P. (Eds.), Jurassic System of Rus…			B	H4-	Volga River, Bolshie Tarhany, Kazan	Russia	-	-	-	pyritised belemnite
TM-12-25	Volga basin Russia	169	18753.8	36.3731	458.198	4.64319	21.3355	429.831	1.24645	10.1661	169		3.26993	34.3763				12.353	6.92377	6.06667	6.59001	0.0271098	Middle Jurassic (Bajocian) ammonite assemblages, Mitta, V.V., 2003. On the Callovian-Oxfordian boundary beds of the Volga basin. Vernadski Museum-Novitates (in Russian) 11, 1-21, Kostyleva, V.V., Mitta, V.V., 2011. Middle Jurassic stratigraphy and sedimentary environments in Tarkhanovskaya Pristan’locality, Tatarstan, in: Zakharov, V.A., Rogov, M.A., Ippolitov, A.P. (Eds.), Jurassic System of Rus…			A	H4-	Volga River, Bolshie Tarhany, Kazan	Russia	-	-	-	pyritised belemnite
TM-12-25	Volga basin Russia	169	1.4762	48.014	695.787	0.891111	2.20195	433.064	1.37995	8.83053	169		1.70891	41.6303				2.57312	73.4635	65.4776	67.3995		Middle Jurassic (Bajocian) ammonite assemblages, Mitta, V.V., 2003. On the Callovian-Oxfordian boundary beds of the Volga basin. Vernadski Museum-Novitates (in Russian) 11, 1-21, Kostyleva, V.V., Mitta, V.V., 2011. Middle Jurassic stratigraphy and sedimentary environments in Tarkhanovskaya Pristan’locality, Tatarstan, in: Zakharov, V.A., Rogov, M.A., Ippolitov, A.P. (Eds.), Jurassic System of Rus…			A	H4-	Volga River, Bolshie Tarhany, Kazan	Russia	-	-	-	pyritised belemnite
TM-12-25	Volga basin Russia	169	0.135742	85.7429	963.548	2.07027	3.13909	645.557	1.39019	10.0319	169	0.00804891	5.45168	63.4813				13.3789	92.7654	82.4329	87.5955		Middle Jurassic (Bajocian) ammonite assemblages, Mitta, V.V., 2003. On the Callovian-Oxfordian boundary beds of the Volga basin. Vernadski Museum-Novitates (in Russian) 11, 1-21, Kostyleva, V.V., Mitta, V.V., 2011. Middle Jurassic stratigraphy and sedimentary environments in Tarkhanovskaya Pristan’locality, Tatarstan, in: Zakharov, V.A., Rogov, M.A., Ippolitov, A.P. (Eds.), Jurassic System of Rus…			B	H4-	Volga River, Bolshie Tarhany, Kazan	Russia	-	-	-	pyritised belemnite
TM-12-25	Volga basin Russia	169	2.9741	106.192	1018.65	4.55553	2.54642	515.196	1.3916	6.61141	169	0.0277054	8.19917	61.6164				17.9346	159.168	142.59	145.645	0.00851246	Middle Jurassic (Bajocian) ammonite assemblages, Mitta, V.V., 2003. On the Callovian-Oxfordian boundary beds of the Volga basin. Vernadski Museum-Novitates (in Russian) 11, 1-21, Kostyleva, V.V., Mitta, V.V., 2011. Middle Jurassic stratigraphy and sedimentary environments in Tarkhanovskaya Pristan’locality, Tatarstan, in: Zakharov, V.A., Rogov, M.A., Ippolitov, A.P. (Eds.), Jurassic System of Rus…			B	H4-	Volga River, Bolshie Tarhany, Kazan	Russia	-	-	-	pyritised belemnite
TM-12-25	Volga basin Russia	169	144.881	62.0944	608.547		3.15064	447.564	1.42331	5.9581	169		10.1265	50.3343				33.8233	28.7731	25.9141	26.514		Middle Jurassic (Bajocian) ammonite assemblages, Mitta, V.V., 2003. On the Callovian-Oxfordian boundary beds of the Volga basin. Vernadski Museum-Novitates (in Russian) 11, 1-21, Kostyleva, V.V., Mitta, V.V., 2011. Middle Jurassic stratigraphy and sedimentary environments in Tarkhanovskaya Pristan’locality, Tatarstan, in: Zakharov, V.A., Rogov, M.A., Ippolitov, A.P. (Eds.), Jurassic System of Rus…			A	H4-	Volga River, Bolshie Tarhany, Kazan	Russia	-	-	-	pyritised belemnite
TM-12-25	Volga basin Russia	169	8.50861	82.0419	778.584	0.806132	1.75391	487.086	1.44287	5.71959	169	0.00858199	5.27364	55.0079				9.58668	81.6201	72.0688	74.1313		Middle Jurassic (Bajocian) ammonite assemblages, Mitta, V.V., 2003. On the Callovian-Oxfordian boundary beds of the Volga basin. Vernadski Museum-Novitates (in Russian) 11, 1-21, Kostyleva, V.V., Mitta, V.V., 2011. Middle Jurassic stratigraphy and sedimentary environments in Tarkhanovskaya Pristan’locality, Tatarstan, in: Zakharov, V.A., Rogov, M.A., Ippolitov, A.P. (Eds.), Jurassic System of Rus…			B	H4-	Volga River, Bolshie Tarhany, Kazan	Russia	-	-	-	pyritised belemnite
TM-12-25	Volga basin Russia	169	125.339	66.5172	758.809		1.54235	573.515	1.58851	8.34669	169	0.00712574	4.7573	55.8907				12.0967	107.839	97.4434	99.4159		Middle Jurassic (Bajocian) ammonite assemblages, Mitta, V.V., 2003. On the Callovian-Oxfordian boundary beds of the Volga basin. Vernadski Museum-Novitates (in Russian) 11, 1-21, Kostyleva, V.V., Mitta, V.V., 2011. Middle Jurassic stratigraphy and sedimentary environments in Tarkhanovskaya Pristan’locality, Tatarstan, in: Zakharov, V.A., Rogov, M.A., Ippolitov, A.P. (Eds.), Jurassic System of Rus…			B	H4-	Volga River, Bolshie Tarhany, Kazan	Russia	-	-	-	pyritised belemnite
TM-12-25	Volga basin Russia	169	1115.12	73.8648	731.499		0.842729	461.833	1.61148	7.29157	169		9.07136	50.3104				29.8834	75.0555	67.7225	69.9069	0.017134	Middle Jurassic (Bajocian) ammonite assemblages, Mitta, V.V., 2003. On the Callovian-Oxfordian boundary beds of the Volga basin. Vernadski Museum-Novitates (in Russian) 11, 1-21, Kostyleva, V.V., Mitta, V.V., 2011. Middle Jurassic stratigraphy and sedimentary environments in Tarkhanovskaya Pristan’locality, Tatarstan, in: Zakharov, V.A., Rogov, M.A., Ippolitov, A.P. (Eds.), Jurassic System of Rus…			A	H4-	Volga River, Bolshie Tarhany, Kazan	Russia	-	-	-	pyritised belemnite
TM-12-25	Volga basin Russia	169	0.97013	95.9383	1098.86	5.17704	2.21341	609.741	1.79219	8.6389	169	0.0226335	6.08267	63.162				13.5371	126.792	117.039	117.971	0.011156	Middle Jurassic (Bajocian) ammonite assemblages, Mitta, V.V., 2003. On the Callovian-Oxfordian boundary beds of the Volga basin. Vernadski Museum-Novitates (in Russian) 11, 1-21, Kostyleva, V.V., Mitta, V.V., 2011. Middle Jurassic stratigraphy and sedimentary environments in Tarkhanovskaya Pristan’locality, Tatarstan, in: Zakharov, V.A., Rogov, M.A., Ippolitov, A.P. (Eds.), Jurassic System of Rus…			B	H4-	Volga River, Bolshie Tarhany, Kazan	Russia	-	-	-	pyritised belemnite
TM-12-25	Volga basin Russia	169	5.16104	103.21	997.821	3.64986	1.94927	509.127	1.86567	6.56539	169	0.0121842	5.06847	54.8746				9.31247	202.078	177.353	187.275		Middle Jurassic (Bajocian) ammonite assemblages, Mitta, V.V., 2003. On the Callovian-Oxfordian boundary beds of the Volga basin. Vernadski Museum-Novitates (in Russian) 11, 1-21, Kostyleva, V.V., Mitta, V.V., 2011. Middle Jurassic stratigraphy and sedimentary environments in Tarkhanovskaya Pristan’locality, Tatarstan, in: Zakharov, V.A., Rogov, M.A., Ippolitov, A.P. (Eds.), Jurassic System of Rus…			B	H4-	Volga River, Bolshie Tarhany, Kazan	Russia	-	-	-	pyritised belemnite
TM-12-25	Volga basin Russia	169	0.034913	114.889	1324.54	2.49275	3.59725	734.127	1.94847	12.3184	169	0.0125657	4.41292	63.6849				7.6482	174.613	149.827	160.407		Middle Jurassic (Bajocian) ammonite assemblages, Mitta, V.V., 2003. On the Callovian-Oxfordian boundary beds of the Volga basin. Vernadski Museum-Novitates (in Russian) 11, 1-21, Kostyleva, V.V., Mitta, V.V., 2011. Middle Jurassic stratigraphy and sedimentary environments in Tarkhanovskaya Pristan’locality, Tatarstan, in: Zakharov, V.A., Rogov, M.A., Ippolitov, A.P. (Eds.), Jurassic System of Rus…			A	H4-	Volga River, Bolshie Tarhany, Kazan	Russia	-	-	-	pyritised belemnite
TM-12-25	Volga basin Russia	169	668.135	66.207	851.592	5.41778	2.66253	570.165	2.29522	10.4037	169	0.0218732	2.6562	52.5122	0.0484043			3.13136	157.597	143.511	149.01		Middle Jurassic (Bajocian) ammonite assemblages, Mitta, V.V., 2003. On the Callovian-Oxfordian boundary beds of the Volga basin. Vernadski Museum-Novitates (in Russian) 11, 1-21, Kostyleva, V.V., Mitta, V.V., 2011. Middle Jurassic stratigraphy and sedimentary environments in Tarkhanovskaya Pristan’locality, Tatarstan, in: Zakharov, V.A., Rogov, M.A., Ippolitov, A.P. (Eds.), Jurassic System of Rus…			A	H4-	Volga River, Bolshie Tarhany, Kazan	Russia	-	-	-	pyritised belemnite
TM-12-25	Volga basin Russia	169	22.9281	113.336	1453.26	13.5025	2.46798	619.119	2.30664	9.0182	169	0.0430807	3.70937	64.7075				4.19644	331.93	295.213	301.262		Middle Jurassic (Bajocian) ammonite assemblages, Mitta, V.V., 2003. On the Callovian-Oxfordian boundary beds of the Volga basin. Vernadski Museum-Novitates (in Russian) 11, 1-21, Kostyleva, V.V., Mitta, V.V., 2011. Middle Jurassic stratigraphy and sedimentary environments in Tarkhanovskaya Pristan’locality, Tatarstan, in: Zakharov, V.A., Rogov, M.A., Ippolitov, A.P. (Eds.), Jurassic System of Rus…			B	H4-	Volga River, Bolshie Tarhany, Kazan	Russia	-	-	-	pyritised belemnite
TM-12-25	Volga basin Russia	169	2.77438	110.886	1175.13	14.3036	3.22619	633.978	3.03093	14.4453	169	0.0464526	3.58845	64.8249			0.00561314	5.80764	234.382	208.449	218.641	0.0083857	Middle Jurassic (Bajocian) ammonite assemblages, Mitta, V.V., 2003. On the Callovian-Oxfordian boundary beds of the Volga basin. Vernadski Museum-Novitates (in Russian) 11, 1-21, Kostyleva, V.V., Mitta, V.V., 2011. Middle Jurassic stratigraphy and sedimentary environments in Tarkhanovskaya Pristan’locality, Tatarstan, in: Zakharov, V.A., Rogov, M.A., Ippolitov, A.P. (Eds.), Jurassic System of Rus…			A	H4-	Volga River, Bolshie Tarhany, Kazan	Russia	-	-	-	pyritised belemnite
TM-12-25	Volga basin Russia	169	331.519	94.8817	1071.29	5.68725	2.34905	792.122	3.36365	14.3316	169	0.0351341	2.66306	70.3893				4.68435	212.73	191.384	200.03		Middle Jurassic (Bajocian) ammonite assemblages, Mitta, V.V., 2003. On the Callovian-Oxfordian boundary beds of the Volga basin. Vernadski Museum-Novitates (in Russian) 11, 1-21, Kostyleva, V.V., Mitta, V.V., 2011. Middle Jurassic stratigraphy and sedimentary environments in Tarkhanovskaya Pristan’locality, Tatarstan, in: Zakharov, V.A., Rogov, M.A., Ippolitov, A.P. (Eds.), Jurassic System of Rus…			A	H4-	Volga River, Bolshie Tarhany, Kazan	Russia	-	-	-	pyritised belemnite
80401720B	Whitby mudstone, Scotland	180	19.0461	51.6531	510.719	7.28642	14.7817	219.284	5.8535	16.0819	180	0.105	0.64	0.302	0.7075	0.094	0.047	0.511222	8.45421	6.90479	8.6329	0.047	Middle Jurassic (Bajocian) ammonite assemblages, Mitta, V.V., 2003. On the Callovian-Oxfordian boundary beds of the Volga basin. Vernadski Museum-Novitates (in Russian) 11, 1-21, Kostyleva, V.V., Mitta, V.V., 2011. Middle Jurassic stratigraphy and sedimentary environments in Tarkhanovskaya Pristan’locality, Tatarstan, in: Zakharov, V.A., Rogov, M.A., Ippolitov, A.P. (Eds.), Jurassic System of Rus…			A	H4-	Volga River, Bolshie Tarhany, Kazan	Russia	-	-	-	pyritised belemnite
80401720B	Whitby mudstone, Scotland	180	813.117	108.563	1040.71	37.8021	372.182	116.05	5.968	70.0618	180	0.339242	0.6525	4.09155	0.7215	0.094	0.048	8.288	48.3439	41.4899	44.8955	0.775253	Middle Jurassic (Bajocian) ammonite assemblages, Mitta, V.V., 2003. On the Callovian-Oxfordian boundary beds of the Volga basin. Vernadski Museum-Novitates (in Russian) 11, 1-21, Kostyleva, V.V., Mitta, V.V., 2011. Middle Jurassic stratigraphy and sedimentary environments in Tarkhanovskaya Pristan’locality, Tatarstan, in: Zakharov, V.A., Rogov, M.A., Ippolitov, A.P. (Eds.), Jurassic System of Rus…			A	H4-	Volga River, Bolshie Tarhany, Kazan	Russia	-	-	-	pyritised belemnite
80401720B	Whitby mudstone, Scotland	180	49.5788	122.638	767.429	63.0604	28.0542	142.127	6.576	218.537	180	0.118	0.719	1.84505	0.795	0.094	0.0525	2.11605	40.9335	33.9146	39.3003	0.316565	Middle Jurassic (Bajocian) ammonite assemblages, Mitta, V.V., 2003. On the Callovian-Oxfordian boundary beds of the Volga basin. Vernadski Museum-Novitates (in Russian) 11, 1-21, Kostyleva, V.V., Mitta, V.V., 2011. Middle Jurassic stratigraphy and sedimentary environments in Tarkhanovskaya Pristan’locality, Tatarstan, in: Zakharov, V.A., Rogov, M.A., Ippolitov, A.P. (Eds.), Jurassic System of Rus…			A	H4-	Volga River, Bolshie Tarhany, Kazan	Russia	-	-	-	pyritised belemnite
80401720B	Whitby mudstone, Scotland	180	744.722	97.0331	882.254	78.3282	433.977	144.256	7.1295	140.778	180	0.714859	0.7795	4.94524	0.8615	0.094	0.057	11.2158	85.1906	73.4093	76.0377	0.73826	Middle Jurassic (Bajocian) ammonite assemblages, Mitta, V.V., 2003. On the Callovian-Oxfordian boundary beds of the Volga basin. Vernadski Museum-Novitates (in Russian) 11, 1-21, Kostyleva, V.V., Mitta, V.V., 2011. Middle Jurassic stratigraphy and sedimentary environments in Tarkhanovskaya Pristan’locality, Tatarstan, in: Zakharov, V.A., Rogov, M.A., Ippolitov, A.P. (Eds.), Jurassic System of Rus…			A	H4-	Volga River, Bolshie Tarhany, Kazan	Russia	-	-	-	pyritised belemnite
80401720B	Whitby mudstone, Scotland	180	1343.59	81.8677	612.485	150.207	554.926	584.735	7.7015	166.462	180	1.28345	2.80923	14.1634	2.37676	0.094	0.0615	20.7743	105.476	91.8328	96.494	1.73969	Middle Jurassic (Bajocian) ammonite assemblages, Mitta, V.V., 2003. On the Callovian-Oxfordian boundary beds of the Volga basin. Vernadski Museum-Novitates (in Russian) 11, 1-21, Kostyleva, V.V., Mitta, V.V., 2011. Middle Jurassic stratigraphy and sedimentary environments in Tarkhanovskaya Pristan’locality, Tatarstan, in: Zakharov, V.A., Rogov, M.A., Ippolitov, A.P. (Eds.), Jurassic System of Rus…			A	H4-	Volga River, Bolshie Tarhany, Kazan	Russia	-	-	-	pyritised belemnite
80401720B	Whitby mudstone, Scotland	180	54.2566	60.8468	273.637	52.9702	50.9464	50.0455	8.0265	187.425	180	0.144	0.8775	3.11469	0.97	0.094	0.0645	3.00524	71.0597	63.1048	65.2774	0.193646	Middle Jurassic (Bajocian) ammonite assemblages, Mitta, V.V., 2003. On the Callovian-Oxfordian boundary beds of the Volga basin. Vernadski Museum-Novitates (in Russian) 11, 1-21, Kostyleva, V.V., Mitta, V.V., 2011. Middle Jurassic stratigraphy and sedimentary environments in Tarkhanovskaya Pristan’locality, Tatarstan, in: Zakharov, V.A., Rogov, M.A., Ippolitov, A.P. (Eds.), Jurassic System of Rus…			A	H4-	Volga River, Bolshie Tarhany, Kazan	Russia	-	-	-	pyritised belemnite
80401720B	Whitby mudstone, Scotland	180	221.584	284.689	1188.84	125.632	108.043	513.999	8.9975	174.02	180	0.775206	0.9835	6.8807	1.0875	0.094	0.072	5.73896	119.801	102.434	110.061	0.912618	Middle Jurassic (Bajocian) ammonite assemblages, Mitta, V.V., 2003. On the Callovian-Oxfordian boundary beds of the Volga basin. Vernadski Museum-Novitates (in Russian) 11, 1-21, Kostyleva, V.V., Mitta, V.V., 2011. Middle Jurassic stratigraphy and sedimentary environments in Tarkhanovskaya Pristan’locality, Tatarstan, in: Zakharov, V.A., Rogov, M.A., Ippolitov, A.P. (Eds.), Jurassic System of Rus…			A	H4-	Volga River, Bolshie Tarhany, Kazan	Russia	-	-	-	pyritised belemnite
80401720B	Whitby mudstone, Scotland	180	818.471	66.4759	525.189	63.1031	429.795	154.897	17.1797	70.3806	180	0.328235	0.919	4.80289	1.016	0.094	0.0675	8.519	76.4621	67.3896	74.1109	1.00899	Middle Jurassic (Bajocian) ammonite assemblages, Mitta, V.V., 2003. On the Callovian-Oxfordian boundary beds of the Volga basin. Vernadski Museum-Novitates (in Russian) 11, 1-21, Kostyleva, V.V., Mitta, V.V., 2011. Middle Jurassic stratigraphy and sedimentary environments in Tarkhanovskaya Pristan’locality, Tatarstan, in: Zakharov, V.A., Rogov, M.A., Ippolitov, A.P. (Eds.), Jurassic System of Rus…			A	H4-	Volga River, Bolshie Tarhany, Kazan	Russia	-	-	-	pyritised belemnite
80401720B	Whitby mudstone, Scotland	180	1816.28	103.208	422.009	110.814	653.937	198.092	17.87	174.065	180	0.93049	1.954	4.54499	2.16	0.094	0.143	9.49275	174.013	154.023	162.732	1.47355	Middle Jurassic (Bajocian) ammonite assemblages, Mitta, V.V., 2003. On the Callovian-Oxfordian boundary beds of the Volga basin. Vernadski Museum-Novitates (in Russian) 11, 1-21, Kostyleva, V.V., Mitta, V.V., 2011. Middle Jurassic stratigraphy and sedimentary environments in Tarkhanovskaya Pristan’locality, Tatarstan, in: Zakharov, V.A., Rogov, M.A., Ippolitov, A.P. (Eds.), Jurassic System of Rus…			A	H4-	Volga River, Bolshie Tarhany, Kazan	Russia	-	-	-	pyritised belemnite
80401720B	Whitby mudstone, Scotland	180	706.12	115.303	1040.65	42.1563	412.802	150.042	19.4002	69.2094	180	0.365444	0.7225	3.71214	0.7985	0.094	0.053	18.783	48.1232	42.0457	44.8442	0.627486	Early Jurassic (Toarcian) fossil assemblages, Howarth, M.K., 1980. Toarcian Correlation Chart, in: Cope, J.C.W. (Ed.), A Correlation of the Jurassic Rocks of the British Isles. Part One: Introduction and Lower Jurassic. Geological Society, London, pp. 53-59, Gill, B.C., Lyons, T.W., Jenkyns, H.C., 2011. A global perturbation to the sulfur cycle during the Toarcian Oceanic Anoxic Event. Earth. Pla…				I3	Dotternhausen	Germany	-	-	Posidonia Shale	black shale with 6% pyrite
80401720B	Whitby mudstone, Scotland	180	16.6492	82.2214	430.77	17.3383	18.9474	465.678	19.7579	110.483	180	0.163	0.992	2.16056	1.0965	0.094	0.0725	1.00684	35.7834	32.9258	32.6617	0.0725	Middle Jurassic (Bajocian) ammonite assemblages, Mitta, V.V., 2003. On the Callovian-Oxfordian boundary beds of the Volga basin. Vernadski Museum-Novitates (in Russian) 11, 1-21, Kostyleva, V.V., Mitta, V.V., 2011. Middle Jurassic stratigraphy and sedimentary environments in Tarkhanovskaya Pristan’locality, Tatarstan, in: Zakharov, V.A., Rogov, M.A., Ippolitov, A.P. (Eds.), Jurassic System of Rus…			A	H4-	Volga River, Bolshie Tarhany, Kazan	Russia	-	-	-	pyritised belemnite
80401720B	Whitby mudstone, Scotland	180	851.257	74.7322	626.019	70.8722	289.801	204.225	22.7562	148.749	180	1.05988	1.0105	7.60376	1.1175	0.094	0.074	12.5979	89.9798	73.4804	72.5499	1.11944	Middle Jurassic (Bajocian) ammonite assemblages, Mitta, V.V., 2003. On the Callovian-Oxfordian boundary beds of the Volga basin. Vernadski Museum-Novitates (in Russian) 11, 1-21, Kostyleva, V.V., Mitta, V.V., 2011. Middle Jurassic stratigraphy and sedimentary environments in Tarkhanovskaya Pristan’locality, Tatarstan, in: Zakharov, V.A., Rogov, M.A., Ippolitov, A.P. (Eds.), Jurassic System of Rus…			A	H4-	Volga River, Bolshie Tarhany, Kazan	Russia	-	-	-	pyritised belemnite
80401720B	Whitby mudstone, Scotland	180	210.743	148.606	698.212	81.0701	151.454	260.879	24.1969	110.037	180	0.174	1.06	2.25052	1.172	0.094	0.0775	6.50317	65.0256	58.8293	69.5922	0.594895
DO-PS-25	Posidonia Shale, Germany	180	22.4911	7.81217	31.5277	1.89226	3.40819	198.905	8.64344	44.3383	180	0.0509511	0.711557	1.48011				2.27271	11.3635	9.24084	9.66906		Early Jurassic (Toarcian) fossil assemblages, Howarth, M.K., 1980. Toarcian Correlation Chart, in: Cope, J.C.W. (Ed.), A Correlation of the Jurassic Rocks of the British Isles. Part One: Introduction and Lower Jurassic. Geological Society, London, pp. 53-59, Gill, B.C., Lyons, T.W., Jenkyns, H.C., 2011. A global perturbation to the sulfur cycle during the Toarcian Oceanic Anoxic Event. Earth. Pla…				I3	Dotternhausen	Germany	-	-	Posidonia Shale	black shale with 6% pyrite
DO-PS-25	Posidonia Shale, Germany	180	8.2481	10.9043	35.1349	5.70303	4.14227	179.543	10.17	43.9333	180	0.161335	0.315482	1.98918				2.49762	14.3535	12.0029	12.2285		Early Jurassic (Toarcian) fossil assemblages, Howarth, M.K., 1980. Toarcian Correlation Chart, in: Cope, J.C.W. (Ed.), A Correlation of the Jurassic Rocks of the British Isles. Part One: Introduction and Lower Jurassic. Geological Society, London, pp. 53-59, Gill, B.C., Lyons, T.W., Jenkyns, H.C., 2011. A global perturbation to the sulfur cycle during the Toarcian Oceanic Anoxic Event. Earth. Pla…					Yorkshire	UK	Lias	Whitby Mudstone	Mulgrave Shale (Jet Rock)
DO-PS-25	Posidonia Shale, Germany	180	47.0616	9.4084	33.123	21.4526	4.19855	187.628	11.6769	61.514	180	0.11103	0.509966	1.96148				2.47475	14.1222	12.424	11.6973		Early Jurassic (Toarcian) fossil assemblages, Howarth, M.K., 1980. Toarcian Correlation Chart, in: Cope, J.C.W. (Ed.), A Correlation of the Jurassic Rocks of the British Isles. Part One: Introduction and Lower Jurassic. Geological Society, London, pp. 53-59, Gill, B.C., Lyons, T.W., Jenkyns, H.C., 2011. A global perturbation to the sulfur cycle during the Toarcian Oceanic Anoxic Event. Earth. Pla…				I3	Dotternhausen	Germany	-	-	Posidonia Shale	black shale with 6% pyrite
DO-PS-25	Posidonia Shale, Germany	180	29.4832	12.055	38.0843	23.2479	2.48177	191.527	12.488	53.7571	180	0.249531	0.950934	2.61904				3.32501	19.3762	17.5976	17.5935	0.0623358	Early Jurassic (Toarcian) fossil assemblages, Howarth, M.K., 1980. Toarcian Correlation Chart, in: Cope, J.C.W. (Ed.), A Correlation of the Jurassic Rocks of the British Isles. Part One: Introduction and Lower Jurassic. Geological Society, London, pp. 53-59, Gill, B.C., Lyons, T.W., Jenkyns, H.C., 2011. A global perturbation to the sulfur cycle during the Toarcian Oceanic Anoxic Event. Earth. Pla…				I3	Dotternhausen	Germany	-	-	Posidonia Shale	black shale with 6% pyrite
DO-PS-25	Posidonia Shale, Germany	180	89.4959	15.9622	59.6097	55.2315	16.5737	200.822	12.5618	88.1577	180	0.350774	0.656119	3.54594				3.44634	20.2565	16.5183	16.8114	0.0988918	Early Jurassic (Toarcian) fossil assemblages, Howarth, M.K., 1980. Toarcian Correlation Chart, in: Cope, J.C.W. (Ed.), A Correlation of the Jurassic Rocks of the British Isles. Part One: Introduction and Lower Jurassic. Geological Society, London, pp. 53-59, Gill, B.C., Lyons, T.W., Jenkyns, H.C., 2011. A global perturbation to the sulfur cycle during the Toarcian Oceanic Anoxic Event. Earth. Pla…				I3	Dotternhausen	Germany	-	-	Posidonia Shale	black shale with 6% pyrite
DO-PS-25	Posidonia Shale, Germany	180	37.0512	8.83471	31.7789	36.4537	0.28699	223.434	13.2689	58.7057	180	0.241585	0.881131	2.50433			0.0335191	2.92798	17.8868	15.2904	16.5681	0.0933072	Early Jurassic (Toarcian) fossil assemblages, Howarth, M.K., 1980. Toarcian Correlation Chart, in: Cope, J.C.W. (Ed.), A Correlation of the Jurassic Rocks of the British Isles. Part One: Introduction and Lower Jurassic. Geological Society, London, pp. 53-59, Gill, B.C., Lyons, T.W., Jenkyns, H.C., 2011. A global perturbation to the sulfur cycle during the Toarcian Oceanic Anoxic Event. Earth. Pla…				I3	Dotternhausen	Germany	-	-	Posidonia Shale	black shale with 6% pyrite
DO-PS-25	Posidonia Shale, Germany	180	7.72363	10.5407	38.2861	2.39824	3.71476	211.903	15.1729	50.7247	180	0.12281	0.876477	1.7979	0.203053			3.05933	14.1426	12.3981	12.057		Early Jurassic (Toarcian) fossil assemblages, Howarth, M.K., 1980. Toarcian Correlation Chart, in: Cope, J.C.W. (Ed.), A Correlation of the Jurassic Rocks of the British Isles. Part One: Introduction and Lower Jurassic. Geological Society, London, pp. 53-59, Gill, B.C., Lyons, T.W., Jenkyns, H.C., 2011. A global perturbation to the sulfur cycle during the Toarcian Oceanic Anoxic Event. Earth. Pla…				I3	Dotternhausen	Germany	-	-	Posidonia Shale	black shale with 6% pyrite
DO-PS-25	Posidonia Shale, Germany	180	50.2678	32.4031	112.934	40.3274	10.895	253.827	16.3595	64.1699	180	0.252132	0.771711	1.77873				2.49364	16.2317	14.0864	14.1242	0.106846	Early Jurassic (Toarcian) fossil assemblages, Howarth, M.K., 1980. Toarcian Correlation Chart, in: Cope, J.C.W. (Ed.), A Correlation of the Jurassic Rocks of the British Isles. Part One: Introduction and Lower Jurassic. Geological Society, London, pp. 53-59, Gill, B.C., Lyons, T.W., Jenkyns, H.C., 2011. A global perturbation to the sulfur cycle during the Toarcian Oceanic Anoxic Event. Earth. Pla…				I3	Dotternhausen	Germany	-	-	Posidonia Shale	black shale with 6% pyrite
DO-PS-25	Posidonia Shale, Germany	180	29.3765	4.79799	17.5355	17.8688	0.731294	290.96	17.5239	82.28	180	0.0684595	0.636404	2.12367				2.59441	12.2157	10.7555	10.3952		Early Jurassic (Toarcian) fossil assemblages, Howarth, M.K., 1980. Toarcian Correlation Chart, in: Cope, J.C.W. (Ed.), A Correlation of the Jurassic Rocks of the British Isles. Part One: Introduction and Lower Jurassic. Geological Society, London, pp. 53-59, Gill, B.C., Lyons, T.W., Jenkyns, H.C., 2011. A global perturbation to the sulfur cycle during the Toarcian Oceanic Anoxic Event. Earth. Pla…				I3	Dotternhausen	Germany	-	-	Posidonia Shale	black shale with 6% pyrite
DO-PS-25	Posidonia Shale, Germany	180	15.3374	5.24993	19.9354	21.3386	1.98789	288.268	17.5539	67.592	180	0.114798	0.536897	2.36676				3.08216	14.1016	11.8119	11.8246		Early Jurassic (Toarcian) fossil assemblages, Howarth, M.K., 1980. Toarcian Correlation Chart, in: Cope, J.C.W. (Ed.), A Correlation of the Jurassic Rocks of the British Isles. Part One: Introduction and Lower Jurassic. Geological Society, London, pp. 53-59, Gill, B.C., Lyons, T.W., Jenkyns, H.C., 2011. A global perturbation to the sulfur cycle during the Toarcian Oceanic Anoxic Event. Earth. Pla…				I3	Dotternhausen	Germany	-	-	Posidonia Shale	black shale with 6% pyrite
DO-PS-25	Posidonia Shale, Germany	180	31.3816	19.7935	94.6299	47.6291	2.70002	288.255	19.4893	67.941	180	0.073998	0.497726	1.62139				2.31415	11.4192	10.4918	10.2257	0.046281	Early Jurassic (Toarcian) fossil assemblages, Howarth, M.K., 1980. Toarcian Correlation Chart, in: Cope, J.C.W. (Ed.), A Correlation of the Jurassic Rocks of the British Isles. Part One: Introduction and Lower Jurassic. Geological Society, London, pp. 53-59, Gill, B.C., Lyons, T.W., Jenkyns, H.C., 2011. A global perturbation to the sulfur cycle during the Toarcian Oceanic Anoxic Event. Earth. Pla…				I3	Dotternhausen	Germany	-	-	Posidonia Shale	black shale with 6% pyrite
DO-PS-25	Posidonia Shale, Germany	180	4.30731	7.73984	20.2081	30.0535	1.95764	517.882	23.4038	64.8097	180	0.0561551	0.654295	2.00259	0.177202			2.86604	13.6034	11.942	12.2424		Early Jurassic (Toarcian) fossil assemblages, Howarth, M.K., 1980. Toarcian Correlation Chart, in: Cope, J.C.W. (Ed.), A Correlation of the Jurassic Rocks of the British Isles. Part One: Introduction and Lower Jurassic. Geological Society, London, pp. 53-59, Gill, B.C., Lyons, T.W., Jenkyns, H.C., 2011. A global perturbation to the sulfur cycle during the Toarcian Oceanic Anoxic Event. Earth. Pla…				I3	Dotternhausen	Germany	-	-	Posidonia Shale	black shale with 6% pyrite
DO-PS-25	Posidonia Shale, Germany	180	11.6966	7.44917	23.5112	25.3032	5.24062	233.775	24.5357	69.3328	180	0.115394	0.732132	2.44757				2.79308	19.0119	16.2889	16.3378	0.0557046	Early Jurassic (Toarcian) fossil assemblages, Howarth, M.K., 1980. Toarcian Correlation Chart, in: Cope, J.C.W. (Ed.), A Correlation of the Jurassic Rocks of the British Isles. Part One: Introduction and Lower Jurassic. Geological Society, London, pp. 53-59, Gill, B.C., Lyons, T.W., Jenkyns, H.C., 2011. A global perturbation to the sulfur cycle during the Toarcian Oceanic Anoxic Event. Earth. Pla…				I3	Dotternhausen	Germany	-	-	Posidonia Shale	black shale with 6% pyrite
DO-PS-25	Posidonia Shale, Germany	180	17.3626	8.84432	27.0013	33.1746	4.69798	239.911	24.6289	71.0657	180	0.196558	1.04427	2.65335				2.65243	18.5871	15.5468	16.2058	0.0664199	Early Jurassic (Toarcian) fossil assemblages, Howarth, M.K., 1980. Toarcian Correlation Chart, in: Cope, J.C.W. (Ed.), A Correlation of the Jurassic Rocks of the British Isles. Part One: Introduction and Lower Jurassic. Geological Society, London, pp. 53-59, Gill, B.C., Lyons, T.W., Jenkyns, H.C., 2011. A global perturbation to the sulfur cycle during the Toarcian Oceanic Anoxic Event. Earth. Pla…				I3	Dotternhausen	Germany	-	-	Posidonia Shale	black shale with 6% pyrite
DO-PS-25	Posidonia Shale, Germany	180	50.7749	30.3919	149.867	57.5547	1.64992	384.82	25.9517	85.0348	180	0.39457	1.10866	3.178				4.29068	29.5814	26.6684	26.5701	0.20289	Early Jurassic (Toarcian) fossil assemblages, Howarth, M.K., 1980. Toarcian Correlation Chart, in: Cope, J.C.W. (Ed.), A Correlation of the Jurassic Rocks of the British Isles. Part One: Introduction and Lower Jurassic. Geological Society, London, pp. 53-59, Gill, B.C., Lyons, T.W., Jenkyns, H.C., 2011. A global perturbation to the sulfur cycle during the Toarcian Oceanic Anoxic Event. Earth. Pla…				I3	Dotternhausen	Germany	-	-	Posidonia Shale	black shale with 6% pyrite
DO-PS-25	Posidonia Shale, Germany	180	11.9262	13.7534	82.6754	54.9401	1.32789	441.614	29.6237	92.8004	180	0.0776209	0.668494	2.26644				2.81618	15.2068	12.3467	12.8229		Early Jurassic (Toarcian) fossil assemblages, Howarth, M.K., 1980. Toarcian Correlation Chart, in: Cope, J.C.W. (Ed.), A Correlation of the Jurassic Rocks of the British Isles. Part One: Introduction and Lower Jurassic. Geological Society, London, pp. 53-59, Gill, B.C., Lyons, T.W., Jenkyns, H.C., 2011. A global perturbation to the sulfur cycle during the Toarcian Oceanic Anoxic Event. Earth. Pla…				I3	Dotternhausen	Germany	-	-	Posidonia Shale	black shale with 6% pyrite
DO-PS-25	Posidonia Shale, Germany	180	6.0645	5.22102	19.7783	29.5611	2.37203	291.195	30.6467	80.9698	180	0.146204	0.97321	2.62087	0.262187		0.0290888	2.80717	18.5026	15.3411	15.2528		Early Jurassic (Toarcian) fossil assemblages, Howarth, M.K., 1980. Toarcian Correlation Chart, in: Cope, J.C.W. (Ed.), A Correlation of the Jurassic Rocks of the British Isles. Part One: Introduction and Lower Jurassic. Geological Society, London, pp. 53-59, Gill, B.C., Lyons, T.W., Jenkyns, H.C., 2011. A global perturbation to the sulfur cycle during the Toarcian Oceanic Anoxic Event. Earth. Pla…				I3	Dotternhausen	Germany	-	-	Posidonia Shale	black shale with 6% pyrite
DO-PS-25	Posidonia Shale, Germany	180	63.7134	7.31308	26.4446	45.7835	4.95917	337.141	34.7264	97.8293	180	0.125009	0.840442	3.12394				2.87001	18.1193	16.657	15.644	0.0978989	Early Jurassic (Toarcian) fossil assemblages, Howarth, M.K., 1980. Toarcian Correlation Chart, in: Cope, J.C.W. (Ed.), A Correlation of the Jurassic Rocks of the British Isles. Part One: Introduction and Lower Jurassic. Geological Society, London, pp. 53-59, Gill, B.C., Lyons, T.W., Jenkyns, H.C., 2011. A global perturbation to the sulfur cycle during the Toarcian Oceanic Anoxic Event. Earth. Pla…				I3	Dotternhausen	Germany	-	-	Posidonia Shale	black shale with 6% pyrite
DO-PS-25	Posidonia Shale, Germany	180	14.2688	10.234	46.9519	44.7624	3.03295	488.889	36.555	84.0654	180	0.137887	0.703555	3.16368	0.219488			3.74301	18.95	16.1046	16.1872	0.0594251	Early Jurassic (Toarcian) fossil assemblages, Howarth, M.K., 1980. Toarcian Correlation Chart, in: Cope, J.C.W. (Ed.), A Correlation of the Jurassic Rocks of the British Isles. Part One: Introduction and Lower Jurassic. Geological Society, London, pp. 53-59, Gill, B.C., Lyons, T.W., Jenkyns, H.C., 2011. A global perturbation to the sulfur cycle during the Toarcian Oceanic Anoxic Event. Earth. Pla…				I3	Dotternhausen	Germany	-	-	Posidonia Shale	black shale with 6% pyrite
DO-PS-25	Posidonia Shale, Germany	180	12.6716	8.79617	33.3616	53.7691	3.69762	360.538	47.1714	102.618	180	0.204266	0.754012	2.70188			0.019378	2.73929	19.2875	17.3102	16.7828	0.152632	Early Jurassic (Toarcian) fossil assemblages, Howarth, M.K., 1980. Toarcian Correlation Chart, in: Cope, J.C.W. (Ed.), A Correlation of the Jurassic Rocks of the British Isles. Part One: Introduction and Lower Jurassic. Geological Society, London, pp. 53-59, Gill, B.C., Lyons, T.W., Jenkyns, H.C., 2011. A global perturbation to the sulfur cycle during the Toarcian Oceanic Anoxic Event. Earth. Pla…				I3	Dotternhausen	Germany	-	-	Posidonia Shale	black shale with 6% pyrite
PM-BS-280	Whitby Mudstone, UK	180	0.641956	23.3275	150.76	56.4259	1.60294	258.758	3.1116	86.9774	180		0.303595	1.9992		0.00190362	0.00450314	0.335412	41.7479	36.4736	37.7336		Early Jurassic (Toarcian) fossil assemblages, Howarth, M.K., 1980. Toarcian Correlation Chart, in: Cope, J.C.W. (Ed.), A Correlation of the Jurassic Rocks of the British Isles. Part One: Introduction and Lower Jurassic. Geological Society, London, pp. 53-59, Gill, B.C., Lyons, T.W., Jenkyns, H.C., 2011. A global perturbation to the sulfur cycle during the Toarcian Oceanic Anoxic Event. Earth. Pla…				I5-	Yorkshire	UK	Lias	Whitby Mudstone	Mulgrave Shale (Jet Rock)	black shale with trace fine grained pyrite
PM-BS-280	Whitby Mudstone, UK	180		13.1103	125.26	68.6896	3.27492	366.092	4.089	92.0676	180			2.20867				0.223097	36.8122	31.76	34.1894		Early Jurassic (Toarcian) fossil assemblages, Howarth, M.K., 1980. Toarcian Correlation Chart, in: Cope, J.C.W. (Ed.), A Correlation of the Jurassic Rocks of the British Isles. Part One: Introduction and Lower Jurassic. Geological Society, London, pp. 53-59, Gill, B.C., Lyons, T.W., Jenkyns, H.C., 2011. A global perturbation to the sulfur cycle during the Toarcian Oceanic Anoxic Event. Earth. Pla…				K1-	Port Mulgrave	Scotland	Lias	Whitby Mudstone	Mulgrave Shale (Jet Rock)	black shale finely laminated with <1% of pyrite
PM-BS-280	Whitby Mudstone, UK	180		21.946	156.752	45.8525	3.21815	258.086	4.21261	144.316	180		0.174973	1.94116				0.327427	45.507	39.3558	42.0075		Early Jurassic (Toarcian) fossil assemblages, Howarth, M.K., 1980. Toarcian Correlation Chart, in: Cope, J.C.W. (Ed.), A Correlation of the Jurassic Rocks of the British Isles. Part One: Introduction and Lower Jurassic. Geological Society, London, pp. 53-59, Gill, B.C., Lyons, T.W., Jenkyns, H.C., 2011. A global perturbation to the sulfur cycle during the Toarcian Oceanic Anoxic Event. Earth. Pla…				I5-	Yorkshire	UK	Lias	Whitby Mudstone	Mulgrave Shale (Jet Rock)	black shale with trace fine grained pyrite
PM-BS-280	Whitby Mudstone, UK	180		72.6449	258.338	35.2992	4.08999	138.998	4.33083	119.062	180		0.205713	2.45565				0.579122	21.2319	20.0353	19.3797		Early Jurassic (Toarcian) fossil assemblages, Howarth, M.K., 1980. Toarcian Correlation Chart, in: Cope, J.C.W. (Ed.), A Correlation of the Jurassic Rocks of the British Isles. Part One: Introduction and Lower Jurassic. Geological Society, London, pp. 53-59, Gill, B.C., Lyons, T.W., Jenkyns, H.C., 2011. A global perturbation to the sulfur cycle during the Toarcian Oceanic Anoxic Event. Earth. Pla…					Yorkshire	UK	Lias	Whitby Mudstone	Mulgrave Shale (Jet Rock)
PM-BS-280	Whitby Mudstone, UK	180		93.1402	308.691	40.8189	5.12553	129.822	4.71042	132.039	180		0.453652	2.46454				0.680679	33.303	29.6841	30.7254		Early Jurassic (Toarcian) fossil assemblages, Howarth, M.K., 1980. Toarcian Correlation Chart, in: Cope, J.C.W. (Ed.), A Correlation of the Jurassic Rocks of the British Isles. Part One: Introduction and Lower Jurassic. Geological Society, London, pp. 53-59, Gill, B.C., Lyons, T.W., Jenkyns, H.C., 2011. A global perturbation to the sulfur cycle during the Toarcian Oceanic Anoxic Event. Earth. Pla…				I5-	Yorkshire	UK	Lias	Whitby Mudstone	Mulgrave Shale (Jet Rock)	black shale with trace fine grained pyrite
PM-BS-280	Whitby Mudstone, UK	180	0.853047	7.52909	74.8968	37.8959	0.418359	462.276	4.71608	106.157	180		0.145599	3.16707				0.239205	41.6741	37.4039	37.5023	0.0176044	Early Jurassic (Toarcian) fossil assemblages, Howarth, M.K., 1980. Toarcian Correlation Chart, in: Cope, J.C.W. (Ed.), A Correlation of the Jurassic Rocks of the British Isles. Part One: Introduction and Lower Jurassic. Geological Society, London, pp. 53-59, Gill, B.C., Lyons, T.W., Jenkyns, H.C., 2011. A global perturbation to the sulfur cycle during the Toarcian Oceanic Anoxic Event. Earth. Pla…					Yorkshire	UK	Lias	Whitby Mudstone	Mulgrave Shale (Jet Rock)
PM-BS-280	Whitby Mudstone, UK	180		9.68234	114.744	40.4322	2.25945	378.35	4.88738	103.897	180		0.140431	2.85617			0.00408479	0.328368	57.3164	48.3764	51.6105		Early Jurassic (Toarcian) fossil assemblages, Howarth, M.K., 1980. Toarcian Correlation Chart, in: Cope, J.C.W. (Ed.), A Correlation of the Jurassic Rocks of the British Isles. Part One: Introduction and Lower Jurassic. Geological Society, London, pp. 53-59, Gill, B.C., Lyons, T.W., Jenkyns, H.C., 2011. A global perturbation to the sulfur cycle during the Toarcian Oceanic Anoxic Event. Earth. Pla…				I5-	Yorkshire	UK	Lias	Whitby Mudstone	Mulgrave Shale (Jet Rock)	black shale with trace fine grained pyrite
PM-BS-280	Whitby Mudstone, UK	180		125.523	351.889	43.5495	7.05574	56.8666	4.89933	101.046	180		0.464046	2.13178				0.616608	27.1097	22.3133	23.3674		Early Jurassic (Toarcian) fossil assemblages, Howarth, M.K., 1980. Toarcian Correlation Chart, in: Cope, J.C.W. (Ed.), A Correlation of the Jurassic Rocks of the British Isles. Part One: Introduction and Lower Jurassic. Geological Society, London, pp. 53-59, Gill, B.C., Lyons, T.W., Jenkyns, H.C., 2011. A global perturbation to the sulfur cycle during the Toarcian Oceanic Anoxic Event. Earth. Pla…					Yorkshire	UK	Lias	Whitby Mudstone	Mulgrave Shale (Jet Rock)
PM-BS-280	Whitby Mudstone, UK	180		10.623	123.594	55.2033	0.954959	349.696	4.91874	93.7034	180		0.236947	2.32903		0.00202419		0.252559	45.2768	40.2622	42.0782		Early Jurassic (Toarcian) fossil assemblages, Howarth, M.K., 1980. Toarcian Correlation Chart, in: Cope, J.C.W. (Ed.), A Correlation of the Jurassic Rocks of the British Isles. Part One: Introduction and Lower Jurassic. Geological Society, London, pp. 53-59, Gill, B.C., Lyons, T.W., Jenkyns, H.C., 2011. A global perturbation to the sulfur cycle during the Toarcian Oceanic Anoxic Event. Earth. Pla…				I5-	Yorkshire	UK	Lias	Whitby Mudstone	Mulgrave Shale (Jet Rock)	black shale with trace fine grained pyrite
PM-BS-280	Whitby Mudstone, UK	180	0.776616	106.494	339.963	44.4603	4.5871	58.2631	5.2668	114.255	180		0.458516	2.20666				0.849325	31.0649	27.3656	28.227		Early Jurassic (Toarcian) fossil assemblages, Howarth, M.K., 1980. Toarcian Correlation Chart, in: Cope, J.C.W. (Ed.), A Correlation of the Jurassic Rocks of the British Isles. Part One: Introduction and Lower Jurassic. Geological Society, London, pp. 53-59, Gill, B.C., Lyons, T.W., Jenkyns, H.C., 2011. A global perturbation to the sulfur cycle during the Toarcian Oceanic Anoxic Event. Earth. Pla…				I5-	Yorkshire	UK	Lias	Whitby Mudstone	Mulgrave Shale (Jet Rock)	black shale with trace fine grained pyrite
PM-BS-280	Whitby Mudstone, UK	180		11.9212	121.153	71.2024	2.65848	413.288	5.32509	94.6652	180		0.198514	2.52508				0.224283	52.9732	46.3034	48.2286		Early Jurassic (Toarcian) fossil assemblages, Howarth, M.K., 1980. Toarcian Correlation Chart, in: Cope, J.C.W. (Ed.), A Correlation of the Jurassic Rocks of the British Isles. Part One: Introduction and Lower Jurassic. Geological Society, London, pp. 53-59, Gill, B.C., Lyons, T.W., Jenkyns, H.C., 2011. A global perturbation to the sulfur cycle during the Toarcian Oceanic Anoxic Event. Earth. Pla…				I5-	Yorkshire	UK	Lias	Whitby Mudstone	Mulgrave Shale (Jet Rock)	black shale with trace fine grained pyrite
PM-BS-280	Whitby Mudstone, UK	180		139.185	410.634	44.8805	4.80954	63.0172	5.61675	120.666	180	0.0218847	0.544926	2.47774			0.00676567	0.947788	32.456	27.8866	30.0354		Early Jurassic (Toarcian) fossil assemblages, Howarth, M.K., 1980. Toarcian Correlation Chart, in: Cope, J.C.W. (Ed.), A Correlation of the Jurassic Rocks of the British Isles. Part One: Introduction and Lower Jurassic. Geological Society, London, pp. 53-59, Gill, B.C., Lyons, T.W., Jenkyns, H.C., 2011. A global perturbation to the sulfur cycle during the Toarcian Oceanic Anoxic Event. Earth. Pla…				I5-	Yorkshire	UK	Lias	Whitby Mudstone	Mulgrave Shale (Jet Rock)	black shale with trace fine grained pyrite
PM-BS-280	Whitby Mudstone, UK	180		130.897	407.703	44.2811	6.42247	63.0913	5.68789	130.5	180	0.0293363	0.420874	2.34721		0.00423716	0.00296989	0.887923	35.1992	31.1046	31.619	0.00467897	Early Jurassic (Toarcian) fossil assemblages, Howarth, M.K., 1980. Toarcian Correlation Chart, in: Cope, J.C.W. (Ed.), A Correlation of the Jurassic Rocks of the British Isles. Part One: Introduction and Lower Jurassic. Geological Society, London, pp. 53-59, Gill, B.C., Lyons, T.W., Jenkyns, H.C., 2011. A global perturbation to the sulfur cycle during the Toarcian Oceanic Anoxic Event. Earth. Pla…				I5-	Yorkshire	UK	Lias	Whitby Mudstone	Mulgrave Shale (Jet Rock)	black shale with trace fine grained pyrite
PM-BS-280	Whitby Mudstone, UK	180	36.0417	88.6984	290.415	106.584	4.68218	175.774	5.80002	223.501	180	0.0385534	0.371985	2.31886				1.11443	49.0007	43.973	44.4935		Early Jurassic (Toarcian) fossil assemblages, Howarth, M.K., 1980. Toarcian Correlation Chart, in: Cope, J.C.W. (Ed.), A Correlation of the Jurassic Rocks of the British Isles. Part One: Introduction and Lower Jurassic. Geological Society, London, pp. 53-59, Gill, B.C., Lyons, T.W., Jenkyns, H.C., 2011. A global perturbation to the sulfur cycle during the Toarcian Oceanic Anoxic Event. Earth. Pla…				I5-	Yorkshire	UK	Lias	Whitby Mudstone	Mulgrave Shale (Jet Rock)	black shale with trace fine grained pyrite
PM-BS-280	Whitby Mudstone, UK	180		82.2702	296.369	41.0881	4.22023	102.122	6.57557	119.756	180		0.487957	2.28213				0.545297	37.4289	33.5079	34.2967		Early Jurassic (Toarcian) fossil assemblages, Howarth, M.K., 1980. Toarcian Correlation Chart, in: Cope, J.C.W. (Ed.), A Correlation of the Jurassic Rocks of the British Isles. Part One: Introduction and Lower Jurassic. Geological Society, London, pp. 53-59, Gill, B.C., Lyons, T.W., Jenkyns, H.C., 2011. A global perturbation to the sulfur cycle during the Toarcian Oceanic Anoxic Event. Earth. Pla…					Yorkshire	UK	Lias	Whitby Mudstone	Mulgrave Shale (Jet Rock)
PM-BS-280	Whitby Mudstone, UK	180	2.63314	9.90508	122.156	52.5466	9.67872	460.947	6.61997	103.385	180		0.171927	3.08965				0.260911	55.4179	50.371	50.9896	0.00908072	Early Jurassic (Toarcian) fossil assemblages, Howarth, M.K., 1980. Toarcian Correlation Chart, in: Cope, J.C.W. (Ed.), A Correlation of the Jurassic Rocks of the British Isles. Part One: Introduction and Lower Jurassic. Geological Society, London, pp. 53-59, Gill, B.C., Lyons, T.W., Jenkyns, H.C., 2011. A global perturbation to the sulfur cycle during the Toarcian Oceanic Anoxic Event. Earth. Pla…				I5-	Yorkshire	UK	Lias	Whitby Mudstone	Mulgrave Shale (Jet Rock)	black shale with trace fine grained pyrite
PM-BS-280	Whitby Mudstone, UK	180	4.88568	105.163	352.071	126.164	2.34701	190.937	6.77932	318.984	180	0.054772	0.558798	2.97182				1.52472	61.826	52.1151	55.4061		Early Jurassic (Toarcian) fossil assemblages, Howarth, M.K., 1980. Toarcian Correlation Chart, in: Cope, J.C.W. (Ed.), A Correlation of the Jurassic Rocks of the British Isles. Part One: Introduction and Lower Jurassic. Geological Society, London, pp. 53-59, Gill, B.C., Lyons, T.W., Jenkyns, H.C., 2011. A global perturbation to the sulfur cycle during the Toarcian Oceanic Anoxic Event. Earth. Pla…					Yorkshire	UK	Lias	Whitby Mudstone	Mulgrave Shale (Jet Rock)
PM-BS-280	Whitby Mudstone, UK	180		10.7622	132.166	75.9647	2.79978	368.16	7.15712	79.9218	180		0.0976223	2.38825				0.209801	46.0915	40.9567	41.6369		Early Jurassic (Toarcian) fossil assemblages, Howarth, M.K., 1980. Toarcian Correlation Chart, in: Cope, J.C.W. (Ed.), A Correlation of the Jurassic Rocks of the British Isles. Part One: Introduction and Lower Jurassic. Geological Society, London, pp. 53-59, Gill, B.C., Lyons, T.W., Jenkyns, H.C., 2011. A global perturbation to the sulfur cycle during the Toarcian Oceanic Anoxic Event. Earth. Pla…					Yorkshire	UK	Lias	Whitby Mudstone	Mulgrave Shale (Jet Rock)
PM-BS-280	Whitby Mudstone, UK	180		125.265	424.122	48.41	5.2703	71.7431	7.37401	120.75	180		0.474276	2.42052				0.755629	30.2912	28.4209	28.0147		Early Jurassic (Toarcian) fossil assemblages, Howarth, M.K., 1980. Toarcian Correlation Chart, in: Cope, J.C.W. (Ed.), A Correlation of the Jurassic Rocks of the British Isles. Part One: Introduction and Lower Jurassic. Geological Society, London, pp. 53-59, Gill, B.C., Lyons, T.W., Jenkyns, H.C., 2011. A global perturbation to the sulfur cycle during the Toarcian Oceanic Anoxic Event. Earth. Pla…					Yorkshire	UK	Lias	Whitby Mudstone	Mulgrave Shale (Jet Rock)
PM-BS-280	Whitby Mudstone, UK	180	0.951668	8.89495	103.333	34.8457	3.50989	429.013	7.89236	87.1763	180			2.81699			0.00319897	0.255262	52.3225	46.5115	48.776		Early Jurassic (Toarcian) fossil assemblages, Howarth, M.K., 1980. Toarcian Correlation Chart, in: Cope, J.C.W. (Ed.), A Correlation of the Jurassic Rocks of the British Isles. Part One: Introduction and Lower Jurassic. Geological Society, London, pp. 53-59, Gill, B.C., Lyons, T.W., Jenkyns, H.C., 2011. A global perturbation to the sulfur cycle during the Toarcian Oceanic Anoxic Event. Earth. Pla…				I5-	Yorkshire	UK	Lias	Whitby Mudstone	Mulgrave Shale (Jet Rock)	black shale with trace fine grained pyrite
PM-BS-280	Whitby Mudstone, UK	180	1052.85	92.5374	838.428	74.5735	326.27	283.798	8.84707	61.5597	180	0.551039	0.662199	8.05779	0.601026		0.0381886	6.34772	56.0202	48.3729	48.8547	0.801531	Early Jurassic (Toarcian) fossil assemblages, Howarth, M.K., 1980. Toarcian Correlation Chart, in: Cope, J.C.W. (Ed.), A Correlation of the Jurassic Rocks of the British Isles. Part One: Introduction and Lower Jurassic. Geological Society, London, pp. 53-59, Gill, B.C., Lyons, T.W., Jenkyns, H.C., 2011. A global perturbation to the sulfur cycle during the Toarcian Oceanic Anoxic Event. Earth. Pla…					Yorkshire	UK	Lias	Whitby Mudstone	Mulgrave Shale (Jet Rock)
PM-BS-280	Whitby Mudstone, UK	180	816.9	77.3993	811.608	85.0664	479.299	214.595	9.61761	41.8391	180	0.48367	0.369971	5.18859	0.655878		0.0361577	12.1647	69.6231	64.0312	64.1904	1.38987	Early Jurassic (Toarcian) fossil assemblages, Howarth, M.K., 1980. Toarcian Correlation Chart, in: Cope, J.C.W. (Ed.), A Correlation of the Jurassic Rocks of the British Isles. Part One: Introduction and Lower Jurassic. Geological Society, London, pp. 53-59, Gill, B.C., Lyons, T.W., Jenkyns, H.C., 2011. A global perturbation to the sulfur cycle during the Toarcian Oceanic Anoxic Event. Earth. Pla…					Yorkshire	UK	Lias	Whitby Mudstone	Mulgrave Shale (Jet Rock)
PM-BS-280	Whitby Mudstone, UK	180	0.251893	11.2457	159.782	47.526	0.225704	601.85	10.2642	120.431	180		0.152843	4.25223				0.17223	71.4609	62.6931	65.2911		Early Jurassic (Toarcian) fossil assemblages, Howarth, M.K., 1980. Toarcian Correlation Chart, in: Cope, J.C.W. (Ed.), A Correlation of the Jurassic Rocks of the British Isles. Part One: Introduction and Lower Jurassic. Geological Society, London, pp. 53-59, Gill, B.C., Lyons, T.W., Jenkyns, H.C., 2011. A global perturbation to the sulfur cycle during the Toarcian Oceanic Anoxic Event. Earth. Pla…					Yorkshire	UK	Lias	Whitby Mudstone	Mulgrave Shale (Jet Rock)
PM-BS-280	Whitby Mudstone, UK	180	1510.09	66.5631	589.897	245.523	570.8	522.539	13.3812	103.827	180	2.31922	2.05532	16.2917	1.64993		0.059044	26.4672	117.203	102.55	106.044	2.29061	Early Jurassic (Toarcian) fossil assemblages, Howarth, M.K., 1980. Toarcian Correlation Chart, in: Cope, J.C.W. (Ed.), A Correlation of the Jurassic Rocks of the British Isles. Part One: Introduction and Lower Jurassic. Geological Society, London, pp. 53-59, Gill, B.C., Lyons, T.W., Jenkyns, H.C., 2011. A global perturbation to the sulfur cycle during the Toarcian Oceanic Anoxic Event. Earth. Pla…					Yorkshire	UK	Lias	Whitby Mudstone	Mulgrave Shale (Jet Rock)
PM-BS-280	Whitby Mudstone, UK	180	1554.59	68.4304	527.167	346.224	389.904	1015.44	24.1104	122.446	180	2.47404	2.82732	22.8056	2.48259			22.7756	111.573	98.8392	101.618	1.8247	Early Jurassic (Toarcian) fossil assemblages, Howarth, M.K., 1980. Toarcian Correlation Chart, in: Cope, J.C.W. (Ed.), A Correlation of the Jurassic Rocks of the British Isles. Part One: Introduction and Lower Jurassic. Geological Society, London, pp. 53-59, Gill, B.C., Lyons, T.W., Jenkyns, H.C., 2011. A global perturbation to the sulfur cycle during the Toarcian Oceanic Anoxic Event. Earth. Pla…					Yorkshire	UK	Lias	Whitby Mudstone	Mulgrave Shale (Jet Rock)
PM-BS-280	Whitby Mudstone, UK	180	1824.21	64.1285	511.647	338.701	613.016	583.617	27.0884	116.89	180	2.8898	1.56347	16.9667	2.145			27.6554	225.091	202.294	205.777	4.23777	Early Jurassic (Toarcian) fossil assemblages, Howarth, M.K., 1980. Toarcian Correlation Chart, in: Cope, J.C.W. (Ed.), A Correlation of the Jurassic Rocks of the British Isles. Part One: Introduction and Lower Jurassic. Geological Society, London, pp. 53-59, Gill, B.C., Lyons, T.W., Jenkyns, H.C., 2011. A global perturbation to the sulfur cycle during the Toarcian Oceanic Anoxic Event. Earth. Pla…					Yorkshire	UK	Lias	Whitby Mudstone	Mulgrave Shale (Jet Rock)
PM-BS-280	Whitby Mudstone, UK	180	1885.28	94.0959	671.276	402.353	482.019	1173.7	31.3284	159.121	180	2.84736	4.16082	26.4099	3.39808		0.0725368	26.5645	162.764	143.655	148.632	2.48121	Early Jurassic (Toarcian) fossil assemblages, Howarth, M.K., 1980. Toarcian Correlation Chart, in: Cope, J.C.W. (Ed.), A Correlation of the Jurassic Rocks of the British Isles. Part One: Introduction and Lower Jurassic. Geological Society, London, pp. 53-59, Gill, B.C., Lyons, T.W., Jenkyns, H.C., 2011. A global perturbation to the sulfur cycle during the Toarcian Oceanic Anoxic Event. Earth. Pla…					Yorkshire	UK	Lias	Whitby Mudstone	Mulgrave Shale (Jet Rock)
KURE-10-27	Kure, Turkey	190	680.727	328.93	280.946	106.453	67.6891	413.658	0.948261	23.0649	190	2.15384		9.86378	2.49577		0.0662138	0.155144	50.7042	47.7182	48.5359	10.4031	Early Jurassic based on limited fossil assemblages and stratigraphic correlations, overain by Late Jurassic limestone, Ediger, V.S., Erler, A., 1990. Palynology, geochemistry, and thermal history of the shales associated with the Küre massive sulfide deposits (northern Turkey). Ore Geology Reviews 5, 461-468.			A	H4-	Küre VMS deposit	Turkey	Lias	-	-	5mm pyrite nodules in black shale
KURE-10-27	Kure, Turkey	190	1132.05	187.652	183.402	75.4395	31.2331	302.263	1.03698	36.9812	190	1.26921	0.0825705	9.79133	1.75866		0.0478626	0.224245	37.5149	35.6886	35.2953	6.87373	Early Jurassic (Toarcian) fossil assemblages, Howarth, M.K., 1980. Toarcian Correlation Chart, in: Cope, J.C.W. (Ed.), A Correlation of the Jurassic Rocks of the British Isles. Part One: Introduction and Lower Jurassic. Geological Society, London, pp. 53-59, Gill, B.C., Lyons, T.W., Jenkyns, H.C., 2011. A global perturbation to the sulfur cycle during the Toarcian Oceanic Anoxic Event. Earth. Pla…				K1-	Port Mulgrave	Scotland	Lias	Whitby Mudstone	Mulgrave Shale (Jet Rock)	black shale finely laminated with <1% of pyrite
KURE-10-27	Kure, Turkey	190	609.944	340.552	346.448	79.9401	37.6888	575.143	1.05882	22.7784	190	1.88037		8.25712	2.01126		0.0640114	0.170688	33.195	29.448	31.9456	3.70601	Early Jurassic based on limited fossil assemblages and stratigraphic correlations, overain by Late Jurassic limestone, Ediger, V.S., Erler, A., 1990. Palynology, geochemistry, and thermal history of the shales associated with the Küre massive sulfide deposits (northern Turkey). Ore Geology Reviews 5, 461-468.			A	H4-	Küre VMS deposit	Turkey	Lias	-	-	5mm pyrite nodules in black shale
KURE-10-27	Kure, Turkey	190	683.997	430.077	441.64	136.833	85.156	548.648	1.1907	25.9844	190	2.16762	0.072797	9.64718	3.85349		0.0915962	0.368756	80.5303	75.3813	77.4254	7.57976	Early Jurassic based on limited fossil assemblages and stratigraphic correlations, overain by Late Jurassic limestone, Ediger, V.S., Erler, A., 1990. Palynology, geochemistry, and thermal history of the shales associated with the Küre massive sulfide deposits (northern Turkey). Ore Geology Reviews 5, 461-468.			A	H4-	Küre VMS deposit	Turkey	Lias	-	-	5mm pyrite nodules in black shale
KURE-10-27	Kure, Turkey	190	1001.06	144.796	312.462	65.383	31.2008	397.759	1.19098	24.1576	190	1.44294	0.0374214	7.67153	1.57962		0.0287595	0.127267	31.5971	26.4706	27.8141	3.2224	Early Jurassic (Toarcian) fossil assemblages, Howarth, M.K., 1980. Toarcian Correlation Chart, in: Cope, J.C.W. (Ed.), A Correlation of the Jurassic Rocks of the British Isles. Part One: Introduction and Lower Jurassic. Geological Society, London, pp. 53-59, Gill, B.C., Lyons, T.W., Jenkyns, H.C., 2011. A global perturbation to the sulfur cycle during the Toarcian Oceanic Anoxic Event. Earth. Pla…				K1-	Port Mulgrave	Scotland	Lias	Whitby Mudstone	Mulgrave Shale (Jet Rock)	black shale finely laminated with <1% of pyrite
KURE-10-27	Kure, Turkey	190	1440.95	205.01	363.808	83.4097	57.674	238.024	1.26279	21.8937	190	1.42391	0.0720075	6.26661	1.53006		0.0429523	0.325995	22.2673	20.1124	21.3186	5.60188	Early Jurassic based on limited fossil assemblages and stratigraphic correlations, overain by Late Jurassic limestone, Ediger, V.S., Erler, A., 1990. Palynology, geochemistry, and thermal history of the shales associated with the Küre massive sulfide deposits (northern Turkey). Ore Geology Reviews 5, 461-468.			A	H4-	Küre VMS deposit	Turkey	Lias	-	-	5mm pyrite nodules in black shale
KURE-10-27	Kure, Turkey	190	926.551	164.729	215.325	52.0741	38.2497	690.839	1.27837	27.1668	190	1.16858	0.0419753	14.7385	1.27405		0.070647	0.414225	35.0554	32.3342	33.4463	2.35171	Early Jurassic (Toarcian) fossil assemblages, Howarth, M.K., 1980. Toarcian Correlation Chart, in: Cope, J.C.W. (Ed.), A Correlation of the Jurassic Rocks of the British Isles. Part One: Introduction and Lower Jurassic. Geological Society, London, pp. 53-59, Gill, B.C., Lyons, T.W., Jenkyns, H.C., 2011. A global perturbation to the sulfur cycle during the Toarcian Oceanic Anoxic Event. Earth. Pla…				K1-	Port Mulgrave	Scotland	Lias	Whitby Mudstone	Mulgrave Shale (Jet Rock)	black shale finely laminated with <1% of pyrite
KURE-10-27	Kure, Turkey	190	594.909	234.705	310.228	74.3516	34.4563	869.68	1.30094	17.7231	190	1.53057		10.5063	1.64607		0.0919198	0.350362	37.9081	33.9353	36.3142	4.83271	Early Jurassic based on limited fossil assemblages and stratigraphic correlations, overain by Late Jurassic limestone, Ediger, V.S., Erler, A., 1990. Palynology, geochemistry, and thermal history of the shales associated with the Küre massive sulfide deposits (northern Turkey). Ore Geology Reviews 5, 461-468.			A	H4-	Küre VMS deposit	Turkey	Lias	-	-	5mm pyrite nodules in black shale
KURE-10-27	Kure, Turkey	190	1105.24	461.335	475.046	103.16	31.7394	390.069	1.31023	29.2748	190	2.98278	0.0283578	14.0554	2.31885		0.0624767	0.272463	37.9212	34.4967	36.3967	8.01026	Early Jurassic based on limited fossil assemblages and stratigraphic correlations, overain by Late Jurassic limestone, Ediger, V.S., Erler, A., 1990. Palynology, geochemistry, and thermal history of the shales associated with the Küre massive sulfide deposits (northern Turkey). Ore Geology Reviews 5, 461-468.			A	H4-	Küre VMS deposit	Turkey	Lias	-	-	5mm pyrite nodules in black shale
KURE-10-27	Kure, Turkey	190	718.478	255.178	337.022	75.1059	32.2634	610.385	1.33515	19.7148	190	1.83074	0.0312209	10.4863	2.91617		0.0911206	0.312416	64.396	58.9672	62.7366	6.60075	Early Jurassic (Toarcian) fossil assemblages, Howarth, M.K., 1980. Toarcian Correlation Chart, in: Cope, J.C.W. (Ed.), A Correlation of the Jurassic Rocks of the British Isles. Part One: Introduction and Lower Jurassic. Geological Society, London, pp. 53-59, Gill, B.C., Lyons, T.W., Jenkyns, H.C., 2011. A global perturbation to the sulfur cycle during the Toarcian Oceanic Anoxic Event. Earth. Pla…				K1-	Port Mulgrave	Scotland	Lias	Whitby Mudstone	Mulgrave Shale (Jet Rock)	black shale finely laminated with <1% of pyrite
KURE-10-27	Kure, Turkey	190	827.926	136.879	214.145	35.6884	47.834	706.857	1.453	18.6758	190	0.72064		32.6245	1.88965		0.108195	0.237096	54.8483	49.168	53.1765	4.57872	Early Jurassic (Toarcian) fossil assemblages, Howarth, M.K., 1980. Toarcian Correlation Chart, in: Cope, J.C.W. (Ed.), A Correlation of the Jurassic Rocks of the British Isles. Part One: Introduction and Lower Jurassic. Geological Society, London, pp. 53-59, Gill, B.C., Lyons, T.W., Jenkyns, H.C., 2011. A global perturbation to the sulfur cycle during the Toarcian Oceanic Anoxic Event. Earth. Pla…				K1-	Port Mulgrave	Scotland	Lias	Whitby Mudstone	Mulgrave Shale (Jet Rock)	black shale finely laminated with <1% of pyrite
KURE-10-27	Kure, Turkey	190	1724.24	114.377	231.547	54.9164	23.4766	183.201	1.65316	11.7959	190	1.20682		26.146	0.411815		0.105745	0.234427	16.0314	14.4594	15.1554	1.17378	Early Jurassic (Toarcian) fossil assemblages, Howarth, M.K., 1980. Toarcian Correlation Chart, in: Cope, J.C.W. (Ed.), A Correlation of the Jurassic Rocks of the British Isles. Part One: Introduction and Lower Jurassic. Geological Society, London, pp. 53-59, Gill, B.C., Lyons, T.W., Jenkyns, H.C., 2011. A global perturbation to the sulfur cycle during the Toarcian Oceanic Anoxic Event. Earth. Pla…				K1-	Port Mulgrave	Scotland	Lias	Whitby Mudstone	Mulgrave Shale (Jet Rock)	black shale finely laminated with <1% of pyrite
KURE-10-27	Kure, Turkey	190	490.702	182.931	241.233	90.0888	111.379	753.314	1.697	10.9342	190	1.63055	0.0422234	22.4586	5.54704		0.152747	0.346638	102.312	90.5015	96.877	11.999	Early Jurassic (Toarcian) fossil assemblages, Howarth, M.K., 1980. Toarcian Correlation Chart, in: Cope, J.C.W. (Ed.), A Correlation of the Jurassic Rocks of the British Isles. Part One: Introduction and Lower Jurassic. Geological Society, London, pp. 53-59, Gill, B.C., Lyons, T.W., Jenkyns, H.C., 2011. A global perturbation to the sulfur cycle during the Toarcian Oceanic Anoxic Event. Earth. Pla…				K1-	Port Mulgrave	Scotland	Lias	Whitby Mudstone	Mulgrave Shale (Jet Rock)	black shale finely laminated with <1% of pyrite
KURE-10-27	Kure, Turkey	190	501.285	115.421	226.249	117.149	105.676	62.437	1.79731	3.33881	190	0.884432	0.100271	4.48332	1.81056		0.021599	0.794057	40.5928	36.2361	37.9685	6.38583	Early Jurassic (Toarcian) fossil assemblages, Howarth, M.K., 1980. Toarcian Correlation Chart, in: Cope, J.C.W. (Ed.), A Correlation of the Jurassic Rocks of the British Isles. Part One: Introduction and Lower Jurassic. Geological Society, London, pp. 53-59, Gill, B.C., Lyons, T.W., Jenkyns, H.C., 2011. A global perturbation to the sulfur cycle during the Toarcian Oceanic Anoxic Event. Earth. Pla…				K1-	Port Mulgrave	Scotland	Lias	Whitby Mudstone	Mulgrave Shale (Jet Rock)	black shale finely laminated with <1% of pyrite
KURE-10-27	Kure, Turkey	190	596.16	387.49	371.207	106.133	109.556	733.348	1.90149	20.5705	190	3.27396	0.0836734	38.6072	9.29387		0.136989	1.72214	150.039	136.574	143.134	19.6149	Early Jurassic (Toarcian) fossil assemblages, Howarth, M.K., 1980. Toarcian Correlation Chart, in: Cope, J.C.W. (Ed.), A Correlation of the Jurassic Rocks of the British Isles. Part One: Introduction and Lower Jurassic. Geological Society, London, pp. 53-59, Gill, B.C., Lyons, T.W., Jenkyns, H.C., 2011. A global perturbation to the sulfur cycle during the Toarcian Oceanic Anoxic Event. Earth. Pla…				K1-	Port Mulgrave	Scotland	Lias	Whitby Mudstone	Mulgrave Shale (Jet Rock)	black shale finely laminated with <1% of pyrite
KURE-10-27	Kure, Turkey	190	1018.54	52.3147	93.6595	19.3796	21.8573	211.935	1.97922	4.51013	190	0.282093		23.2638	0.269786		0.103625	0.151213	6.10706	5.31638	6.16336	0.787571
KURE-10-27	Kure, Turkey	190	655.819	144.908	221.282	45.5008	89.1694	729.151	1.9843	18.6544	190	0.795848	0.111698	10.2041	1.93609		0.0891989	0.143915	58.047	51.0483	59.3428	4.49849	Early Jurassic based on limited fossil assemblages and stratigraphic correlations, overain by Late Jurassic limestone, Ediger, V.S., Erler, A., 1990. Palynology, geochemistry, and thermal history of the shales associated with the Küre massive sulfide deposits (northern Turkey). Ore Geology Reviews 5, 461-468.			A	H4-	Küre VMS deposit	Turkey	Lias	-	-	5mm pyrite nodules in black shale
KURE-10-27	Kure, Turkey	190	1328.74	706.393	497.646	143.475	40.3734	441.941	2.1579	14.3443	190	4.96875		51.7044	8.30659		0.137255	0.402899	125.993	115.469	122.59	30.7572	Early Jurassic (Toarcian) fossil assemblages, Howarth, M.K., 1980. Toarcian Correlation Chart, in: Cope, J.C.W. (Ed.), A Correlation of the Jurassic Rocks of the British Isles. Part One: Introduction and Lower Jurassic. Geological Society, London, pp. 53-59, Gill, B.C., Lyons, T.W., Jenkyns, H.C., 2011. A global perturbation to the sulfur cycle during the Toarcian Oceanic Anoxic Event. Earth. Pla…				K1-	Port Mulgrave	Scotland	Lias	Whitby Mudstone	Mulgrave Shale (Jet Rock)	black shale finely laminated with <1% of pyrite
KURE-10-27	Kure, Turkey	190	1250.46	621.291	346.17	112.126	54.1292	621.63	2.38507	47.5493	190	4.54717	0.0684731	62.4834	10.25		0.17121	0.497309	177.474	161.273	168.977	30.8244	Early Jurassic (Toarcian) fossil assemblages, Howarth, M.K., 1980. Toarcian Correlation Chart, in: Cope, J.C.W. (Ed.), A Correlation of the Jurassic Rocks of the British Isles. Part One: Introduction and Lower Jurassic. Geological Society, London, pp. 53-59, Gill, B.C., Lyons, T.W., Jenkyns, H.C., 2011. A global perturbation to the sulfur cycle during the Toarcian Oceanic Anoxic Event. Earth. Pla…				K1-	Port Mulgrave	Scotland	Lias	Whitby Mudstone	Mulgrave Shale (Jet Rock)	black shale finely laminated with <1% of pyrite
KURE-10-27	Kure, Turkey	190	1166.62	684.286	432.02	117.823	39.8826	507.118	2.79772	28.2488	190	4.44218	0.0348934	50.4105	9.01134		0.149499	0.542983	148.309	129.706	137.862	30.9441	Early Jurassic (Toarcian) fossil assemblages, Howarth, M.K., 1980. Toarcian Correlation Chart, in: Cope, J.C.W. (Ed.), A Correlation of the Jurassic Rocks of the British Isles. Part One: Introduction and Lower Jurassic. Geological Society, London, pp. 53-59, Gill, B.C., Lyons, T.W., Jenkyns, H.C., 2011. A global perturbation to the sulfur cycle during the Toarcian Oceanic Anoxic Event. Earth. Pla…				K1-	Port Mulgrave	Scotland	Lias	Whitby Mudstone	Mulgrave Shale (Jet Rock)	black shale finely laminated with <1% of pyrite
P4-6	Nth. West Shelf, Aus.	202	2.76538	14.6451	92.1649	22.2495	1.61675	147.793	0.934346	29.0125	202	0.0886957		1.53209				0.492465	19.7572	17.7628	19.2752	0.00650973
P4-6	Nth. West Shelf, Aus.	202	11.4397	16.416	164.757	50.1011	29.0018	138.884	1.07272	33.9621	202	0.115799	0.0418457	1.41821			0.0019829	0.493194	31.9973	28.4944	30.7853	0.0101011	Early Jurassic based on limited fossil assemblages and stratigraphic correlations, overain by Late Jurassic limestone, Ediger, V.S., Erler, A., 1990. Palynology, geochemistry, and thermal history of the shales associated with the Küre massive sulfide deposits (northern Turkey). Ore Geology Reviews 5, 461-468.			B	H4-	Küre VMS deposit	Turkey	Lias	-	-	5mm pyrite nodules in black shale
P4-6	Nth. West Shelf, Aus.	202	7.2325	10.1262	149.903	54.8807	15.2642	126.422	1.12973	33.7161	202	0.104682	0.0444537	0.934654				0.52972	21.1248	19.0272	20.4747	0.0193017	Early Jurassic based on limited fossil assemblages and stratigraphic correlations, overain by Late Jurassic limestone, Ediger, V.S., Erler, A., 1990. Palynology, geochemistry, and thermal history of the shales associated with the Küre massive sulfide deposits (northern Turkey). Ore Geology Reviews 5, 461-468.			B	H4-	Küre VMS deposit	Turkey	Lias	-	-	5mm pyrite nodules in black shale
P4-6	Nth. West Shelf, Aus.	202	26.0338	15.0119	99.0349	38.0435	36.1327	136.94	1.35277	32.5014	202	0.0667448	0.0261759	1.55049				0.480926	41.0256	35.4896	39.4497	0.0109741	Early Jurassic based on limited fossil assemblages and stratigraphic correlations, overain by Late Jurassic limestone, Ediger, V.S., Erler, A., 1990. Palynology, geochemistry, and thermal history of the shales associated with the Küre massive sulfide deposits (northern Turkey). Ore Geology Reviews 5, 461-468.			B	H4-	Küre VMS deposit	Turkey	Lias	-	-	5mm pyrite nodules in black shale
P4-6	Nth. West Shelf, Aus.	202	2.21145	13.6562	66.1792	15.3444	1.90523	125.817	1.49735	27.2007	202	0.0546904		1.10053			0.00213766	0.648699	19.5673	17.942	18.7277	0.0063817	Early Jurassic based on limited fossil assemblages and stratigraphic correlations, overain by Late Jurassic limestone, Ediger, V.S., Erler, A., 1990. Palynology, geochemistry, and thermal history of the shales associated with the Küre massive sulfide deposits (northern Turkey). Ore Geology Reviews 5, 461-468.			A	H4-	Küre VMS deposit	Turkey	Lias	-	-	5mm pyrite nodules in black shale
P4-6	Nth. West Shelf, Aus.	202	1.24892	28.0924	220.611	54.4645	3.97442	177.302	1.56421	34.8752	202	0.146215	0.017681	1.65032				0.599246	26.3611	23.7387	25.5138	0.00953475	Early Jurassic based on limited fossil assemblages and stratigraphic correlations, overain by Late Jurassic limestone, Ediger, V.S., Erler, A., 1990. Palynology, geochemistry, and thermal history of the shales associated with the Küre massive sulfide deposits (northern Turkey). Ore Geology Reviews 5, 461-468.			B	H4-	Küre VMS deposit	Turkey	Lias	-	-	5mm pyrite nodules in black shale
P4-6	Nth. West Shelf, Aus.	202	8.02987	30.2686	122.667	30.165	4.38496	158.97	1.60968	29.3057	202	0.139151	0.0337003	1.81528	0.035336		0.00300521	0.408139	64.1841	56.9601	62.0049	0.00381997	Early Jurassic based on limited fossil assemblages and stratigraphic correlations, overain by Late Jurassic limestone, Ediger, V.S., Erler, A., 1990. Palynology, geochemistry, and thermal history of the shales associated with the Küre massive sulfide deposits (northern Turkey). Ore Geology Reviews 5, 461-468.			B	H4-	Küre VMS deposit	Turkey	Lias	-	-	5mm pyrite nodules in black shale
P4-6	Nth. West Shelf, Aus.	202	5.57848	23.4933	205.404	48.5983	6.52267	224.388	1.66367	34.5687	202	0.150881	0.0669882	3.4629	0.176896			0.795261	47.7706	43.0932	46.6866	0.271289	Early Jurassic based on limited fossil assemblages and stratigraphic correlations, overain by Late Jurassic limestone, Ediger, V.S., Erler, A., 1990. Palynology, geochemistry, and thermal history of the shales associated with the Küre massive sulfide deposits (northern Turkey). Ore Geology Reviews 5, 461-468.			B	H4-	Küre VMS deposit	Turkey	Lias	-	-	5mm pyrite nodules in black shale
P4-6	Nth. West Shelf, Aus.	202	17.0952	29.6545	247.774	54.0945	2.65695	218.838	1.66452	31.8936	202	0.196975	0.0261341	2.34332	0.0307031		0.00287012	0.784165	36.5212	31.6095	34.0979	0.0475228	Early Jurassic based on limited fossil assemblages and stratigraphic correlations, overain by Late Jurassic limestone, Ediger, V.S., Erler, A., 1990. Palynology, geochemistry, and thermal history of the shales associated with the Küre massive sulfide deposits (northern Turkey). Ore Geology Reviews 5, 461-468.			A	H4-	Küre VMS deposit	Turkey	Lias	-	-	5mm pyrite nodules in black shale
P4-6	Nth. West Shelf, Aus.	202	2.56857	43.487	305.894	67.4615	2.53272	228.384	1.84206	33.8705	202	0.218361	0.0373548	2.58021	0.0248169		0.00230855	0.807156	44.9	40.023	43.0223	0.016768	Early Jurassic based on limited fossil assemblages and stratigraphic correlations, overain by Late Jurassic limestone, Ediger, V.S., Erler, A., 1990. Palynology, geochemistry, and thermal history of the shales associated with the Küre massive sulfide deposits (northern Turkey). Ore Geology Reviews 5, 461-468.			B	H4-	Küre VMS deposit	Turkey	Lias	-	-	5mm pyrite nodules in black shale
P4-6	Nth. West Shelf, Aus.	202	4.23274	33.338	116.562	27.8665	4.45089	140.186	1.88591	32.0335	202	0.0854235		1.30542				0.510948	24.3794	21.8159	23.8745	0.0114427	Early Jurassic based on limited fossil assemblages and stratigraphic correlations, overain by Late Jurassic limestone, Ediger, V.S., Erler, A., 1990. Palynology, geochemistry, and thermal history of the shales associated with the Küre massive sulfide deposits (northern Turkey). Ore Geology Reviews 5, 461-468.			B	H4-	Küre VMS deposit	Turkey	Lias	-	-	5mm pyrite nodules in black shale
P4-6	Nth. West Shelf, Aus.	202	1.03265	13.5331	72.4082	28.0227	3.49586	116.901	2.09097	28.5883	202	0.0430779	0.0292316	1.06762				0.477978	25.4745	24.0425	25.5989	0.038406	Late Triassic (Rhaetian) fossil assemblages, Riding, J.B., Mantle, D.J., Backhouse, J., 2010. A review of the chronostratigraphical ages of Middle Triassic to Late Jurassic dinoflagellate cyst biozones of the North West Shelf of Australia. Review of Palaeobotany and Palynology 162, 543-575.			A	E1-	Pluto drill hole, North West Shelf	Australia	-	Brigadier	Upper D unit	black to dark grey shale with 1-2% pyrite
P4-6	Nth. West Shelf, Aus.	202	43.0691	37.407	172.745	48.8375	38.9651	216.421	2.27954	35.2913	202	0.143833	0.0722599	2.27644	0.0408073			0.490211	61.5689	54.4794	59.2108	0.0299028	Early Jurassic based on limited fossil assemblages and stratigraphic correlations, overain by Late Jurassic limestone, Ediger, V.S., Erler, A., 1990. Palynology, geochemistry, and thermal history of the shales associated with the Küre massive sulfide deposits (northern Turkey). Ore Geology Reviews 5, 461-468.			B	H4-	Küre VMS deposit	Turkey	Lias	-	-	5mm pyrite nodules in black shale
P4-6	Nth. West Shelf, Aus.	202	0.501739	51.1372	196.981	58.1345	0.856165	266.539	4.46043	28.6449	202	0.109449	0.0190075	7.17471				1.69809	193.722	171.451	185.722	0.0138828	Early Jurassic based on limited fossil assemblages and stratigraphic correlations, overain by Late Jurassic limestone, Ediger, V.S., Erler, A., 1990. Palynology, geochemistry, and thermal history of the shales associated with the Küre massive sulfide deposits (northern Turkey). Ore Geology Reviews 5, 461-468.			A	H4-	Küre VMS deposit	Turkey	Lias	-	-	5mm pyrite nodules in black shale
P4-6	Nth. West Shelf, Aus.	202	3.54862	121.799	497.402	101.823	5.69864	738.363	6.85339	39.0181	202	0.462895	0.0340863	7.0528	0.0470264		0.0064507	1.36785	250.202	222.988	241.057	0.0331811	Early Jurassic based on limited fossil assemblages and stratigraphic correlations, overain by Late Jurassic limestone, Ediger, V.S., Erler, A., 1990. Palynology, geochemistry, and thermal history of the shales associated with the Küre massive sulfide deposits (northern Turkey). Ore Geology Reviews 5, 461-468.			B	H4-	Küre VMS deposit	Turkey	Lias	-	-	5mm pyrite nodules in black shale
BE-5413	Bentong, Malaysia	205	370.069	2.44829	166.646	283.212	8.9311	149.882	21.9036	2.51873	205	6.78853	2.41402	128.4	0.989967	0.000110056	0.109118	1.83388	37.4012	31.186	33.7442	0.134048	Late Triassic (Rhaetian) fossil assemblages, Riding, J.B., Mantle, D.J., Backhouse, J., 2010. A review of the chronostratigraphical ages of Middle Triassic to Late Jurassic dinoflagellate cyst biozones of the North West Shelf of Australia. Review of Palaeobotany and Palynology 162, 543-575.			A	E1-	Pluto drill hole, North West Shelf	Australia	-	Brigadier	Upper D unit	black to dark grey shale with 1-2% pyrite
BE-5413	Bentong, Malaysia	205	192.916	3.28113	166.351	274.47	10.2477	166.232	26.9428	4.53426	205	4.71002	1.67625	120.783	1.05444	0.00319553	0.106401	1.73299	37.6757	31.3254	33.9216	0.149441	Late Triassic (Rhaetian) fossil assemblages, Riding, J.B., Mantle, D.J., Backhouse, J., 2010. A review of the chronostratigraphical ages of Middle Triassic to Late Jurassic dinoflagellate cyst biozones of the North West Shelf of Australia. Review of Palaeobotany and Palynology 162, 543-575.			A	E1-	Pluto drill hole, North West Shelf	Australia	-	Brigadier	Upper D unit	black to dark grey shale with 1-2% pyrite
BE-5413	Bentong, Malaysia	205	303.018	23.5826	368.005	310.419	14.6562	491.676	29.3597	2.29399	205	9.20854	3.61571	134.839	1.12127	0.0121871	0.151625	1.68697	34.7611	29.3623	31.2353	0.425565	207.1±3.2 Ma; MSWD = 1.3					Bentong, Malaysia	Malaysia	Bentong Group	BRSZ Unit 2		Black shales with about 15% pyrite framboids
BE-5413	Bentong, Malaysia	205	126.771	21.1079	347.057	303.256	12.4796	625.736	32.8853	9.59517	205	6.75707	2.70118	125.95	1.39654	0.0144607	0.230571	1.53042	35.8365	29.996	32.0928	0.259623	207.1±3.2 Ma; MSWD = 1.3					Bentong, Malaysia	Malaysia	Bentong Group	BRSZ Unit 2		Black shales with about 15% pyrite framboids
BE-5413	Bentong, Malaysia	205	816.505	2.21264	125.2	228.192	16.7818	144.768	39.9759	7.24343	205	6.86564	2.43804	108.368	0.933438	0.0063665	0.118306	1.41472	33.8818	27.9837	29.2595	0.112759	Late Triassic (Rhaetian) fossil assemblages, Riding, J.B., Mantle, D.J., Backhouse, J., 2010. A review of the chronostratigraphical ages of Middle Triassic to Late Jurassic dinoflagellate cyst biozones of the North West Shelf of Australia. Review of Palaeobotany and Palynology 162, 543-575.			A	E1-	Pluto drill hole, North West Shelf	Australia	-	Brigadier	Upper D unit	black to dark grey shale with 1-2% pyrite
BE-5413	Bentong, Malaysia	205	421.98	5.72339	358.701	383.617	78.7121	244.891	40.9631	3.83918	205	9.61227	7.81584	161.924	1.3551	0.00883879	0.239421	2.12769	44.415	36.5426	39.0682	0.2048	207.1±3.2 Ma; MSWD = 1.3					Bentong, Malaysia	Malaysia	Bentong Group	BRSZ Unit 2		Black shales with about 15% pyrite framboids
BE-5413	Bentong, Malaysia	205	585.574	3.37361	178.623	292.837	13.3244	179.799	41.0847	4.18702	205	7.28946	2.46722	145.899	0.917292	0.00710358	0.143583	2.22473	42.6866	35.1442	39.0435	0.147163	207.1±3.2 Ma; MSWD = 1.3					Bentong, Malaysia	Malaysia	Bentong Group	BRSZ Unit 2		Black shales with about 15% pyrite framboids
BE-5413	Bentong, Malaysia	205	497.71	32.3727	454.294	341.224	116.721	388.275	46.2665	6.32989	205	7.60794	3.71634	172.872	2.31862	0.0172574	0.184015	2.15001	51.5396	42.852	46.8137	0.826344	207.1±3.2 Ma; MSWD = 1.3					Bentong, Malaysia	Malaysia	Bentong Group	BRSZ Unit 2		Black shales with about 15% pyrite framboids
BE-5413	Bentong, Malaysia	205	1389.02	16.8483	438.787	358.999	231.61	333.832	46.5983	0.199303	205	0.126753	0.0831215	146.46	2.5428	0.0162114	0.257859	2.10029	46.5345	39.5085	41.1286	0.860369	207.1±3.2 Ma; MSWD = 1.3					Bentong, Malaysia	Malaysia	Bentong Group	BRSZ Unit 2		Black shales with about 15% pyrite framboids
BE-5413	Bentong, Malaysia	205	1699.91	4.9524	277.053	318.824	43.6947	163.871	54.218	25.252	205	11.4281	3.54685	132.576	1.78738	0.0103705	0.214497	3.10554	38.3581	32.3565	35.0471	0.66255	207.1±3.2 Ma; MSWD = 1.3					Bentong, Malaysia	Malaysia	Bentong Group	BRSZ Unit 2		Black shales with about 15% pyrite framboids
BE-5413	Bentong, Malaysia	205	1264.09	6.3912	175.564	227.963	20.0863	1185.52	54.4966	9.04878	205	8.81159	2.7088	88.4221	0.949371	0.0119609	0.108852	1.19885	26.033	21.9638	23.1361	0.121868	Late Triassic (Rhaetian) fossil assemblages, Riding, J.B., Mantle, D.J., Backhouse, J., 2010. A review of the chronostratigraphical ages of Middle Triassic to Late Jurassic dinoflagellate cyst biozones of the North West Shelf of Australia. Review of Palaeobotany and Palynology 162, 543-575.			A	E1-	Pluto drill hole, North West Shelf	Australia	-	Brigadier	Upper D unit	black to dark grey shale with 1-2% pyrite
BE-5413	Bentong, Malaysia	205	242.976	4.51907	234.628	304.333	11.6418	210.368	54.531	13.7875	205	10.8277	2.75239	140.407	1.18142	0.00284228	0.15746	2.24157	38.764	31.9709	34.5745	0.170512	Late Triassic (Rhaetian) fossil assemblages, Riding, J.B., Mantle, D.J., Backhouse, J., 2010. A review of the chronostratigraphical ages of Middle Triassic to Late Jurassic dinoflagellate cyst biozones of the North West Shelf of Australia. Review of Palaeobotany and Palynology 162, 543-575.			A	E1-	Pluto drill hole, North West Shelf	Australia	-	Brigadier	Upper D unit	black to dark grey shale with 1-2% pyrite
BE-5413	Bentong, Malaysia	205	673.645	10.9485	304.058	355.428	57.7852	1188.65	55.0489	9.33637	205	5.0188	2.13845	168.863	2.27458	0.0284487	0.261622	3.58705	54.7059	45.1668	49.4635	0.309981	Late Triassic (Rhaetian) fossil assemblages, Riding, J.B., Mantle, D.J., Backhouse, J., 2010. A review of the chronostratigraphical ages of Middle Triassic to Late Jurassic dinoflagellate cyst biozones of the North West Shelf of Australia. Review of Palaeobotany and Palynology 162, 543-575.			A	E1-	Pluto drill hole, North West Shelf	Australia	-	Brigadier	Upper D unit	black to dark grey shale with 1-2% pyrite
BE-5413	Bentong, Malaysia	205	1543.57	9.35537	514.631	406.898	108.548	239.949	56.9639	5.02821	205	9.63844	3.76453	174.626	1.86547	0.0187114	0.212644	2.42367	45.1451	37.2906	40.4129	0.566679	207.1±3.2 Ma; MSWD = 1.3					Bentong, Malaysia	Malaysia	Bentong Group	BRSZ Unit 2		Black shales with about 15% pyrite framboids
BE-5413	Bentong, Malaysia	205	462.399	5.87456	245.867	306.704	29.3951	176.317	57.7019	4.53434	205	6.03107	2.17079	108.924	0.902342	0.00255511	0.14154	1.65901	30.8712	25.9044	28.0608	0.269288	Late Triassic (Rhaetian) fossil assemblages, Riding, J.B., Mantle, D.J., Backhouse, J., 2010. A review of the chronostratigraphical ages of Middle Triassic to Late Jurassic dinoflagellate cyst biozones of the North West Shelf of Australia. Review of Palaeobotany and Palynology 162, 543-575.			A	E1-	Pluto drill hole, North West Shelf	Australia	-	Brigadier	Upper D unit	black to dark grey shale with 1-2% pyrite
BE-5413	Bentong, Malaysia	205	258.63	4.0343	254.948	308.998	102.775	201.595	59.4919	7.31306	205	6.95805	2.67367	149.013	1.30716	0.00847574	0.178313	3.50057	43.2228	36.0621	39.8129	0.183508	Late Triassic (Rhaetian) fossil assemblages, Riding, J.B., Mantle, D.J., Backhouse, J., 2010. A review of the chronostratigraphical ages of Middle Triassic to Late Jurassic dinoflagellate cyst biozones of the North West Shelf of Australia. Review of Palaeobotany and Palynology 162, 543-575.			A	E1-	Pluto drill hole, North West Shelf	Australia	-	Brigadier	Upper D unit	black to dark grey shale with 1-2% pyrite
BE-5413	Bentong, Malaysia	205	1249.48	1.93615	175.051	299.665	32.8305	200.962	59.7734	1.15779	205	6.98085	2.64324	133.38	1.06381	0.00728042	0.241536	2.1881	36.2633	30.7271	32.6302	0.150376	207.1±3.2 Ma; MSWD = 1.3					Bentong, Malaysia	Malaysia	Bentong Group	BRSZ Unit 2		Black shales with about 15% pyrite framboids
BE-5413	Bentong, Malaysia	205	257.893	40.0905	519.822	335.081	17.2851	331.451	62.5051	7.91514	205	7.23228	4.5023	180.359	1.5825	0.00935264	0.159608	2.67813	43.7903	36.5198	39.7147	0.75572	207.1±3.2 Ma; MSWD = 1.3					Bentong, Malaysia	Malaysia	Bentong Group	BRSZ Unit 2		Black shales with about 15% pyrite framboids
BE-5413	Bentong, Malaysia	205	1174.15	3.15038	225.173	306.716	206.721	197.008	63.2921	4.79104	205	13.5965	3.54657	128.446	0.984978	0.00715301	0.142625	2.15203	34.8473	29.492	31.66	0.14205
BE-5413	Bentong, Malaysia	205	222.016	35.1982	394.256	347.177	534.172	298.995	72.1604	0.879457	205	6.77962	2.35217	180.828	1.77039	0.0138068	0.15359	2.27583	53.3192	44.9285	48.4948	0.465562	207.1±3.2 Ma; MSWD = 1.3					Bentong, Malaysia	Malaysia	Bentong Group	BRSZ Unit 2		Black shales with about 15% pyrite framboids
BE-5413	Bentong, Malaysia	205	462.752	39.555	490.881	361.764	602.466	320.159	72.8518	3.83083	205	7.65969	2.29746	206.241	2.51169	0.027676	0.201403	5.51982	66.0545	55.6156	60.2095	0.746739	207.1±3.2 Ma; MSWD = 1.3					Bentong, Malaysia	Malaysia	Bentong Group	BRSZ Unit 2		Black shales with about 15% pyrite framboids
BE-5413	Bentong, Malaysia	205	2410.19	3.24302	225.919	344.579	87.9352	244.156	75.7749	3.03217	205	7.29378	2.73551	128.593	1.25672	0.0164271	0.16436	2.35032	34.7421	28.9659	31.5484	0.159504	Late Triassic (Rhaetian) fossil assemblages, Riding, J.B., Mantle, D.J., Backhouse, J., 2010. A review of the chronostratigraphical ages of Middle Triassic to Late Jurassic dinoflagellate cyst biozones of the North West Shelf of Australia. Review of Palaeobotany and Palynology 162, 543-575.			A	E1-	Pluto drill hole, North West Shelf	Australia	-	Brigadier	Upper D unit	black to dark grey shale with 1-2% pyrite
BE-5413	Bentong, Malaysia	205	3019.06	13.8564	320.556	385.718	135.832	727.091	76.5622	8.55238	205	6.56603	2.62133	164.675	2.88585	0.0340687	0.213434	3.17584	54.715	45.8329	49.7188	0.516428	Late Triassic (Rhaetian) fossil assemblages, Riding, J.B., Mantle, D.J., Backhouse, J., 2010. A review of the chronostratigraphical ages of Middle Triassic to Late Jurassic dinoflagellate cyst biozones of the North West Shelf of Australia. Review of Palaeobotany and Palynology 162, 543-575.			A	E1-	Pluto drill hole, North West Shelf	Australia	-	Brigadier	Upper D unit	black to dark grey shale with 1-2% pyrite
BE-5413	Bentong, Malaysia	205	1255.47	6.46494	376.9	231.852	157.92	1472.83	79.2842	2.23691	205	16.8324	2.75505	136.931	1.50723	0.0230097	0.28984	2.65382	33.9344	29.135	31.0255	0.323434	207.1±3.2 Ma; MSWD = 1.3					Bentong, Malaysia	Malaysia	Bentong Group	BRSZ Unit 2		Black shales with about 15% pyrite framboids
BE-5413	Bentong, Malaysia	205	5658.06	40.4394	538.591	368.285	2365.98	406.101	79.5318	6.40968	205	8.91387	11.071	174.63	5.12341	0.0356107	0.434351	4.60161	50.9358	42.5036	46.0339	2.21494	207.1±3.2 Ma; MSWD = 1.3					Bentong, Malaysia	Malaysia	Bentong Group	BRSZ Unit 2		Black shales with about 15% pyrite framboids
BE-5413	Bentong, Malaysia	205	2871.71	4.77522	334.636	271.538	197.058	186.834	80.184	6.59061	205	5.79673	4.99137	110.384	1.87046	0.0205539	0.193529	2.10017	32.6327	26.9116	30.1529	0.500044	207.1±3.2 Ma; MSWD = 1.3					Bentong, Malaysia	Malaysia	Bentong Group	BRSZ Unit 2		Black shales with about 15% pyrite framboids
BE-5413	Bentong, Malaysia	205	1629.62	7.87014	371.253	387.425	71.5111	705.934	80.7721	5.02435	205	7.89246	3.35718	196.763	2.17442	0.0207263	0.276695	5.63827	63.203	53.7759	58.1933	0.300569	231.6±3.6 Ma; MSWD = 1.3					Semantan	Malaysia		Semantan Formation		Black shales interbedded with sandstone overlain by tuffs
BE-5413	Bentong, Malaysia	205	2307.2	9.2736	321.189	342.998	122.649	264.035	83.2453	0.940083	205	8.03377	3.72901	135.021	2.18388	0.0222679	0.188057	2.32212	40.1864	33.1516	36.5294	0.444841	207.1±3.2 Ma; MSWD = 1.3					Bentong, Malaysia	Malaysia	Bentong Group	BRSZ Unit 2		Black shales with about 15% pyrite framboids
BE-5413	Bentong, Malaysia	205	2729.02	3.68501	205.386	301.345	82.4732	212.868	85.6839	4.62553	205	8.82075	3.02291	122.904	1.19094	0.0133513	0.171686	2.45472	35.3154	28.6851	31.4163	0.144638	207.1±3.2 Ma; MSWD = 1.3					Bentong, Malaysia	Malaysia	Bentong Group	BRSZ Unit 2		Black shales with about 15% pyrite framboids
BE-5413	Bentong, Malaysia	205	1820.93	6.06558	259.643	344.217	23.9912	401.303	85.8737	2.57576	205	7.08082	2.6987	128.915	1.28194	0.0136474	0.197064	1.74758	35.2194	29.7918	32.6019	0.115279	Late Triassic (Rhaetian) fossil assemblages, Riding, J.B., Mantle, D.J., Backhouse, J., 2010. A review of the chronostratigraphical ages of Middle Triassic to Late Jurassic dinoflagellate cyst biozones of the North West Shelf of Australia. Review of Palaeobotany and Palynology 162, 543-575.			A	E1-	Pluto drill hole, North West Shelf	Australia	-	Brigadier	Upper D unit	black to dark grey shale with 1-2% pyrite
BE-5413	Bentong, Malaysia	205	859.955	7.33135	387.626	343.703	55.0352	598.17	86.111	2.86141	205	8.13735	3.23551	184.64	1.60178	0.022315	0.280644	3.60839	51.6185	43.608	46.5855	0.232851	Late Triassic (Rhaetian) fossil assemblages, Riding, J.B., Mantle, D.J., Backhouse, J., 2010. A review of the chronostratigraphical ages of Middle Triassic to Late Jurassic dinoflagellate cyst biozones of the North West Shelf of Australia. Review of Palaeobotany and Palynology 162, 543-575.			A	E1-	Pluto drill hole, North West Shelf	Australia	-	Brigadier	Upper D unit	black to dark grey shale with 1-2% pyrite
BE-5413	Bentong, Malaysia	205	312.065	5.47354	435.736	319.728	1604.87	270.254	89.551	7.07668	205	11.6101	8.96041	187.166	0.973762	0.00618446	0.205885	3.07886	49.3594	42.0444	44.6731	0.225262	207.1±3.2 Ma; MSWD = 1.3					Bentong, Malaysia	Malaysia	Bentong Group	BRSZ Unit 2		Black shales with about 15% pyrite framboids
BE-5413	Bentong, Malaysia	205	1227.43	9.41108	368.638	309.012	59.0746	1024.2	96.6866	26.4347	205	8.2439	2.77179	151.514	2.00385	0.0290169	0.261531	4.6841	43.5158	36.081	38.9355	0.21652	231.6±3.6 Ma; MSWD = 1.3					Semantan	Malaysia		Semantan Formation		Black shales interbedded with sandstone overlain by tuffs
BE-5413	Bentong, Malaysia	205	886.647	3.96488	384.866	290.434	153.744	297.923	101.679	4.4794	205	10.4786	20.0155	211.701	1.15276	0.0157884	0.319441	4.42564	52.6714	43.7912	47.2349	0.264778	207.1±3.2 Ma; MSWD = 1.3					Bentong, Malaysia	Malaysia	Bentong Group	BRSZ Unit 2		Black shales with about 15% pyrite framboids
BE-5413	Bentong, Malaysia	205	888.861	5.79746	614.236	376.942	654.242	345.503	101.697	2.19477	205	14.3654	2.37229	245.302	1.75239	0.00736396	0.300756	5.7133	64.3514	54.7404	57.7984	0.350246	207.1±3.2 Ma; MSWD = 1.3					Bentong, Malaysia	Malaysia	Bentong Group	BRSZ Unit 2		Black shales with about 15% pyrite framboids
BE-5413	Bentong, Malaysia	205	3056.89	4.13994	229.483	312.532	249.461	236.9	103.522	7.18774	205	7.68288	4.38907	134.981	1.45672	0.00819055	0.173753	2.89979	35.7469	29.9642	32.5155	0.325203	207.1±3.2 Ma; MSWD = 1.3					Bentong, Malaysia	Malaysia	Bentong Group	BRSZ Unit 2		Black shales with about 15% pyrite framboids
BE-5413	Bentong, Malaysia	205	1501.27	12.5846	380.883	318.493	347.805	230.136	103.841	4.74787	205	9.57024	3.10059	126.673	1.13953	0.00381559	0.13685	2.6306	29.8866	25.0915	27.4674	0.453041	207.1±3.2 Ma; MSWD = 1.3					Bentong, Malaysia	Malaysia	Bentong Group	BRSZ Unit 2		Black shales with about 15% pyrite framboids
BE-5413	Bentong, Malaysia	205	2069.3	5.14943	245.653	323.981	52.9321	294.015	103.9	4.34259	205	7.01893	4.25221	128.41	1.28064	0.00623886	0.182236	2.79894	35.0592	29.4767	32.0643	0.144813	Late Triassic (Rhaetian) fossil assemblages, Riding, J.B., Mantle, D.J., Backhouse, J., 2010. A review of the chronostratigraphical ages of Middle Triassic to Late Jurassic dinoflagellate cyst biozones of the North West Shelf of Australia. Review of Palaeobotany and Palynology 162, 543-575.			A	E1-	Pluto drill hole, North West Shelf	Australia	-	Brigadier	Upper D unit	black to dark grey shale with 1-2% pyrite
BE-5413	Bentong, Malaysia	205	1551.99	46.0466	597.021	401.111	383.199	316.025	107.87	10.5448	205	8.45755	28.1782	193.678	6.36819	0.0907018	0.655487	6.6989	59.3607	51.9783	56.7996	2.71936	231.6±3.6 Ma; MSWD = 1.3					Semantan	Malaysia		Semantan Formation		Black shales interbedded with sandstone overlain by tuffs
BE-5413	Bentong, Malaysia	205	1427.36	6.37831	336.304	281.691	834.369	343.91	112.353	15.1561	205	6.57884	2.36537	160.707	1.5528	0.00983539	0.194579	3.71822	45.8586	37.8151	40.7634	0.258776	207.1±3.2 Ma; MSWD = 1.3					Bentong, Malaysia	Malaysia	Bentong Group	BRSZ Unit 2		Black shales with about 15% pyrite framboids
BE-5413	Bentong, Malaysia	205	1873.91	4.90475	288.613	369.736	219.903	293.983	115.942	4.11616	205	9.68691	4.63033	165.031	1.21853	0.011635	0.203416	3.55813	42.046	34.8305	37.1423	0.372732	207.1±3.2 Ma; MSWD = 1.3					Bentong, Malaysia	Malaysia	Bentong Group	BRSZ Unit 2		Black shales with about 15% pyrite framboids
BE-5413	Bentong, Malaysia	205	2221.01	6.17635	273.856	312.533	192.387	225.621	120.2	24.6438	205	14.0893	6.18227	88.5017	1.46874	0.0198572	0.144009	2.71636	24.1737	20.0332	22.2615	0.192113	231.6±3.6 Ma; MSWD = 1.3					Semantan	Malaysia		Semantan Formation		Black shales interbedded with sandstone overlain by tuffs
BE-5413	Bentong, Malaysia	205	277.644	3.90844	416.168	293.499	12.1308	300.602	124.305	208.736	205	3.25846	0.518312	170.115	1.21313	0.0194422	0.328638	3.17692	51.691	42.9604	45.8924	0.385181	207.1±3.2 Ma; MSWD = 1.3					Bentong, Malaysia	Malaysia	Bentong Group	BRSZ Unit 2		Black shales with about 15% pyrite framboids
BE-5413	Bentong, Malaysia	205	2589.43	2.48148	154.909	271.86	86.0583	224.333	137.393	4.88285	205	9.68017	3.87797	101.516	1.08802	0.00524076	0.124094	2.44521	29.3089	24.8622	27.1683	0.167488	Late Triassic (Rhaetian) fossil assemblages, Riding, J.B., Mantle, D.J., Backhouse, J., 2010. A review of the chronostratigraphical ages of Middle Triassic to Late Jurassic dinoflagellate cyst biozones of the North West Shelf of Australia. Review of Palaeobotany and Palynology 162, 543-575.			A	E1-	Pluto drill hole, North West Shelf	Australia	-	Brigadier	Upper D unit	black to dark grey shale with 1-2% pyrite
BE-5413	Bentong, Malaysia	205	2571.15	6.01364	268.988	185.747	61.9208	301	143.041	3.31512	205	14.7231	10.689	108.122	1.32003	0.0191863	0.10866	2.80724	30.2909	25.6135	27.7818	0.166659	207.1±3.2 Ma; MSWD = 1.3					Bentong, Malaysia	Malaysia	Bentong Group	BRSZ Unit 2		Black shales with about 15% pyrite framboids
BE-5413	Bentong, Malaysia	205	2055.38	5.24687	357.004	270.784	91.0582	847.55	157.706	9.87863	205	8.09721	4.28465	138.423	1.41332	0.0241751	0.21556	2.58985	33.9478	28.0637	30.5631	0.182132	207.1±3.2 Ma; MSWD = 1.3					Bentong, Malaysia	Malaysia	Bentong Group	BRSZ Unit 2		Black shales with about 15% pyrite framboids
BE-5413	Bentong, Malaysia	205	406.638	3.54561	337.929	271.012	25.4064	1029.12	184.807	7.45019	205	7.38736	2.27461	172.267	1.89485	0.0266684	0.376347	2.92932	50.5757	42.2751	44.7359	0.295017	207.1±3.2 Ma; MSWD = 1.3					Bentong, Malaysia	Malaysia	Bentong Group	BRSZ Unit 2		Black shales with about 15% pyrite framboids
BE-5413	Bentong, Malaysia	205	5768.31	12.3853	391.099	267.717	93.7569	298.851	191.03	6.99272	205	4.13011	2.88174	137.859	2.10788	0.0597552	0.133249	5.64925	41.2514	33.6675	36.6863	0.227658	231.6±3.6 Ma; MSWD = 1.3					Semantan	Malaysia		Semantan Formation		Black shales interbedded with sandstone overlain by tuffs
BE-5413	Bentong, Malaysia	205	2625.28	6.36384	395.897	271.262	95.808	414.143	209.791	5.94525	205	8.13019	3.63716	183.511	2.75059	0.0593101	0.240306	3.20491	46.3682	38.0901	41.3446	0.256212	207.1±3.2 Ma; MSWD = 1.3					Bentong, Malaysia	Malaysia	Bentong Group	BRSZ Unit 2		Black shales with about 15% pyrite framboids
BE-5413	Bentong, Malaysia	205	0.00160948	0.0672474	58.7768	6.0022	0.497132	104.495	234.661	7.47793	205	5.7915	3.22797	4.1622	-0.00345994	-0.000259892	0.00185544	0.0821925	1.00861	0.845701	0.91439	0.0140014	207.1±3.2 Ma; MSWD = 1.3					Bentong, Malaysia	Malaysia	Bentong Group	BRSZ Unit 2		Black shales with about 15% pyrite framboids
BE-6313	Bentong, Malaysia	205	10.8053	2.87525	275.18	183.648	7.72633	75.7419	17.5397	207.457	205	3.72727	2.1589	22.9358	0.220236	-0.00117111	0.117388	2.88952	21.6217	17.6506	18.4299	0.047664	207.1±3.2 Ma; MSWD = 1.3					Bentong, Malaysia	Malaysia	Bentong Group	BRSZ Unit 2		Black shales with about 15% pyrite framboids
BE-6313	Bentong, Malaysia	205	12.1595	3.47548	292.168	216.889	10.2474	86.5465	22.9869	135.367	205	3.83402	1.23303	28.5909	0.163865	0.00396317	0.116202	2.88286	21.9121	18.6754	19.2641	0.0254912	207.1±3.2 Ma; MSWD = 1.3					Bentong, Malaysia	Malaysia	Bentong Group	BRSZ Unit 2		Black shales with about 15% pyrite framboids
BE-6313	Bentong, Malaysia	205	3.25201	3.13937	286.608	175.331	29.7575	89.0125	24.0499	2.88719	205	20.4477	1.3475	28.016	0.203396	-0.000426527	0.0926363	2.55441	30.7411	25.4007	26.3868	0.0342197	207.1±3.2 Ma; MSWD = 1.3					Bentong, Malaysia	Malaysia	Bentong Group	BRSZ Unit 2		Black shales with about 15% pyrite framboids
BE-6313	Bentong, Malaysia	205	6.03956	3.02583	297.894	211.816	161.25	188.8	25.6071	167.105	205	4.12169	1.81906	36.727	0.276037	0.00243371	0.152579	3.04376	47.2248	38.9355	40.5075	0.0508705	207.1±3.2 Ma; MSWD = 1.3					Bentong, Malaysia	Malaysia	Bentong Group	BRSZ Unit 2		Black shales with about 15% pyrite framboids
BE-6313	Bentong, Malaysia	205	2.02879	3.85089	399.193	204.993	12.6882	106.825	26.3389	199.754	205	4.86365	1.09081	35.4036	0.189766	0.00950927	0.111411	3.25863	35.8619	29.6858	30.8652	0.0285636	207.1±3.2 Ma; MSWD = 1.3					Bentong, Malaysia	Malaysia	Bentong Group	BRSZ Unit 2		Black shales with about 15% pyrite framboids
BE-6313	Bentong, Malaysia	205	2.04366	4.61994	371.765	197.512	17.8068	108.37	26.5603	165.702	205	5.45864	2.7085	35.0906	0.175356	-0.00245767	0.127141	2.81505	40.392	33.7942	35.3291	0.0219176	207.1±3.2 Ma; MSWD = 1.3					Bentong, Malaysia	Malaysia	Bentong Group	BRSZ Unit 2		Black shales with about 15% pyrite framboids
BE-6313	Bentong, Malaysia	205	0.889276	5.9757	371.073	203.51	5.03691	84.2146	26.5689	168.478	205	4.64187	1.58903	25.4935	0.13016	-0.000427143	0.0924337	3.23865	24.8739	20.3823	21.4503	0.00738097	207.1±3.2 Ma; MSWD = 1.3					Bentong, Malaysia	Malaysia	Bentong Group	BRSZ Unit 2		Black shales with about 15% pyrite framboids
BE-6313	Bentong, Malaysia	205	2.36549	4.22773	367.484	219.534	72.0945	116.896	28.2916	172.986	205	5.83289	3.57375	44.0317	0.266624	0.00220402	0.147887	3.15278	42.8029	34.9426	37.026	0.0530708	207.1±3.2 Ma; MSWD = 1.3					Bentong, Malaysia	Malaysia	Bentong Group	BRSZ Unit 2		Black shales with about 15% pyrite framboids
BE-6313	Bentong, Malaysia	205	1.21461	11.3867	507.632	210.695	8.50472	253.109	29.34	120	205	3.58701	1.35723	46.2728	0.209443	-0.0119224	0.105162	3.71705	36.1105	29.9586	31.4673	0.0232062	207.1±3.2 Ma; MSWD = 1.3					Bentong, Malaysia	Malaysia	Bentong Group	BRSZ Unit 2		Black shales with about 15% pyrite framboids
BE-6313	Bentong, Malaysia	205	1.85807	8.0028	422.102	166.808	20.2396	166.028	29.6919	231.432	205	3.99094	1.05295	37.5944	0.297987	-0.00122932	0.114412	2.5637	41.8078	35.8	36.7191	0.0703333	207.1±3.2 Ma; MSWD = 1.3					Bentong, Malaysia	Malaysia	Bentong Group	BRSZ Unit 2		Black shales with about 15% pyrite framboids
BE-6313	Bentong, Malaysia	205	2.53754	6.63942	482.456	185.815	5.63501	111.649	39.522	181.779	205	4.56917	1.65156	38.0454	0.350677	0.00106236	0.0932679	3.03423	36.924	31.2284	31.7555	0.0254952	207.1±3.2 Ma; MSWD = 1.3					Bentong, Malaysia	Malaysia	Bentong Group	BRSZ Unit 2		Black shales with about 15% pyrite framboids
BE-6313	Bentong, Malaysia	205	2.03616	17.5952	599.619	253.682	20.69	178.254	50.8457	169.785	205	7.8807	1.23785	62.5455	0.381959	-0.00564961	0.146658	3.71195	55.5235	45.988	48.7593	0.0325701	207.1±3.2 Ma; MSWD = 1.3					Bentong, Malaysia	Malaysia	Bentong Group	BRSZ Unit 2		Black shales with about 15% pyrite framboids
BE-6313	Bentong, Malaysia	205	0.984117	21.0992	847.607	287.761	13.2141	309.257	62.03	179.92	205	5.75508	1.778	81.2802	0.501142	0.00993153	0.195155	4.28951	74.9681	62.5935	65.5424	0.0455109	207.1±3.2 Ma; MSWD = 1.3					Bentong, Malaysia	Malaysia	Bentong Group	BRSZ Unit 2		Black shales with about 15% pyrite framboids
BE-6313	Bentong, Malaysia	205	0.863071	17.3073	922.23	279.439	13.7099	325.024	65.9561	185.358	205	6.09363	1.61759	99.6645	0.545919	0.00715738	0.182136	4.22955	68.6604	56.9627	60.9804	0.111873	207.1±3.2 Ma; MSWD = 1.3					Bentong, Malaysia	Malaysia	Bentong Group	BRSZ Unit 2		Black shales with about 15% pyrite framboids
BE-6313	Bentong, Malaysia	205	0.629307	69.2398	975.005	311.266	18.6326	224.768	92.1563	127.37	205	6.45665	1.27479	87.7422	0.598564	-0.00634763	0.12966	4.98867	63.3893	52.3601	54.6926	0.0767242	207.1±3.2 Ma; MSWD = 1.3					Bentong, Malaysia	Malaysia	Bentong Group	BRSZ Unit 2		Black shales with about 15% pyrite framboids
ME-6612A	Semantan, Malaysia	205		480.271	180.01	766.135	841.788	3201.11	7.74378	4.96808	205	4.56031	0.568441	13.7131	3.51378		1.15791	1.14357	35.8131	31.1675	35.4265	72.2613	207.1±3.2 Ma; MSWD = 1.3					Bentong, Malaysia	Malaysia	Bentong Group	BRSZ Unit 2		Black shales with about 15% pyrite framboids
ME-6612A	Semantan, Malaysia	205		145.796	116.92	1856.29	1437.95	4656.51	19.5668	8.67945	205	55.6833	26.9203	23.1703	11.6478		0.04	4.81163	30.4468	28.6961	27.2713	83.692	207.1±3.2 Ma; MSWD = 1.3					Bentong, Malaysia	Malaysia	Bentong Group	BRSZ Unit 2		Black shales with about 15% pyrite framboids
ME-6612B	Semantan, Malaysia	205		160.682	123.893	572.017	731.509	2787.11	10.5193	5.42515	205	12.2002	0.662852	19.6058	5.8413		0.02	1.17898	29.6709	26.463	28.0735	56.8687	207.1±3.2 Ma; MSWD = 1.3					Bentong, Malaysia	Malaysia	Bentong Group	BRSZ Unit 2		Black shales with about 15% pyrite framboids
ME-6612B	Semantan, Malaysia	205		106.66	114.8	839.802	1040.51	2271.76	11.1993	2.57364	205	6.37671	0.718371	31.4848	6.8445		0.02	1.42817	65.5981	66.3697	62.4387	69.3568	207.1±3.2 Ma; MSWD = 1.3					Bentong, Malaysia	Malaysia	Bentong Group	BRSZ Unit 2		Black shales with about 15% pyrite framboids
ME-6612B	Semantan, Malaysia	205		153.799	166.531	1640.77	1592.18	2768.81	15.4272	2.18937	205	4.65405	0.2	62.3303	17.9701		0.0775044	1.07589	100.166	87.7754	95.5875	135.075	207.1±3.2 Ma; MSWD = 1.3					Bentong, Malaysia	Malaysia	Bentong Group	BRSZ Unit 2		Black shales with about 15% pyrite framboids
F1-A	Otago basin, N.Z.	250	2919.22	976.897	301.538	323.485	6063.6	788.151	5.2969	6.79612	250	9.83423	3.16421	77.7754	11.5759	0.0305	0.364847	5.39944	395.473	344.309	363.838	51.7325	207.1±3.2 Ma; MSWD = 1.3					Bentong, Malaysia	Malaysia	Bentong Group	BRSZ Unit 2		Black shales with about 15% pyrite framboids
F1-A	Otago basin, N.Z.	250	2108.52	1077.84	300.132	1393.68	7444.79	940.063	5.43972	9.81142	250	9.9253	7.48766	89.7587	11.9042	0.0305	0.322933	6.2492	445.853	394.243	409.627	66.381	207.1±3.2 Ma; MSWD = 1.3					Bentong, Malaysia	Malaysia	Bentong Group	BRSZ Unit 2		Black shales with about 15% pyrite framboids
F1-A	Otago basin, N.Z.	250	890.335	226.127	86.57	67.844	466.787	148.598	6.72486	0.882333	250	1.3968	0.391017	18.5537	1.13726	0.0305	0.0175	0.445651	151.902	142.314	142.589	18.195	207.1±3.2 Ma; MSWD = 1.3					Bentong, Malaysia	Malaysia	Bentong Group	BRSZ Unit 2		Black shales with about 15% pyrite framboids
F1-A	Otago basin, N.Z.	250	306.364	1100.49	231.112	1425.37	7374.06	2603.26	9.10942	36.7076	250	34.9742	3.51758	90.3572	28.3045	0.0305	0.818514	2.55529	646.36	579.71	618.982	115.658	207.1±3.2 Ma; MSWD = 1.3					Bentong, Malaysia	Malaysia	Bentong Group	BRSZ Unit 2		Black shales with about 15% pyrite framboids
F1-A	Otago basin, N.Z.	250	3691.98	1451.3	285.666	5301.11	6219.01	5745.17	11.1116	101.39	250	49.6915	3.07606	105.527	41.5125	0.0305	1.21526	13.6689	1411.11	1264.09	1324.15	165.838	207.1±3.2 Ma; MSWD = 1.3					Bentong, Malaysia	Malaysia	Bentong Group	BRSZ Unit 2		Black shales with about 15% pyrite framboids
F1-A	Otago basin, N.Z.	250	399.206	1089.95	235.822	1236.28	5662.47	2618.66	11.2851	35.1504	250	27.4081	3.05711	90.55	27.4074	0.0305	0.675954	3.1693	627.169	574.461	596.243	110.392	207.1±3.2 Ma; MSWD = 1.3					Bentong, Malaysia	Malaysia	Bentong Group	BRSZ Unit 2		Black shales with about 15% pyrite framboids
F1-A	Otago basin, N.Z.	250	757.599	2716.34	587.777	7165.35	959.36	2810.12	14.2315	122.893	250	68.4762	0.749494	295.062	70.4423	0.0305	1.93461	39.44	5406.5	4802.57	5090.47	309.965	207.1±3.2 Ma; MSWD = 1.3					Bentong, Malaysia	Malaysia	Bentong Group	BRSZ Unit 2		Black shales with about 15% pyrite framboids
RB2-13	Perth Basin, Aus.	250	1761.73	106.98	108.819	177.522	97.6857	144.879	2.42	14.1643	250	3.29871	1.27409	5.04867	0.217		0.0542517	2.43213	98.1851	87.7684	94.9601	0.477214	207.1±3.2 Ma; MSWD = 1.3					Bentong, Malaysia	Malaysia	Bentong Group	BRSZ Unit 2		Black shales with about 15% pyrite framboids
RB2-13	Perth Basin, Aus.	250	1153.57	21.9441	81.8722	304.7	108.42	254.316	5.72777	14.0716	250	2.54151	1.22968	5.23896	0.551135		0.014	0.667104	132.912	113.153	123.696	1.45667	207.1±3.2 Ma; MSWD = 1.3					Bentong, Malaysia	Malaysia	Bentong Group	BRSZ Unit 2		Black shales with about 15% pyrite framboids
RB2-13	Perth Basin, Aus.	250	580.255	39.5429	79.3142	331.51	176.426	158.408	6.26026	24.5595	250	2.82076	2.11888	4.79874	0.418229	0.011	0.004	0.270359	124.849	113.51	120.171	1.20562	207.1±3.2 Ma; MSWD = 1.3					Bentong, Malaysia	Malaysia	Bentong Group	BRSZ Unit 2		Black shales with about 15% pyrite framboids
RB2-13	Perth Basin, Aus.	250	1635.41	22.7245	18.0697			158.689	6.2743	110.282	250	0.203614	3.4896	4.59429	0.31183	0.011	0.006	3.32585	27.5492	23.9148	24.5691	0.0736111	207.1±3.2 Ma; MSWD = 1.3					Bentong, Malaysia	Malaysia	Bentong Group	BRSZ Unit 2		Black shales with about 15% pyrite framboids
RB2-13	Perth Basin, Aus.	250	773.64	26.6759	104.21	792.24	146.15	351.439	9.65295	30.4327	250	4.09721	2.28149	10.1459	0.871509	0.011	0.0215101	0.597718	265.701	234.394	248.943	4.1479	Samples straddle the Late Permian-Early Triassic boundary (fossil assemblages), Thomas, B.M., Willink, R.J., Grice, K., Twitchett, R.J., Purcell, R.R., Archbold, N.W., George, A.D., Tye, S., Alexander, R., Foster, C.B., Barber, C.J., 2004. Unique marine Permian- Triassic boundary section from Western Australia. Australian Journal of Earth Sciences 51, 423-430, Origin Energy Ltd, 2011. Redback-2 W…				J1-	Redback 2 drill hole, Perth Basin	Australia	-	Kockatea Shale	Hovea	microbial laminated black mudstone ~ 1% pyrite
RB2-13	Perth Basin, Aus.	250	723.872	23.8064	95.3988	773.977	137.185	333.574	10.3073	22.1373	250	2.62415	2.07277	9.07443	0.883066	0.011	0.0136634	0.392112	238.639	216.22	227.076	3.77765	Samples straddle the Late Permian-Early Triassic boundary (fossil assemblages), Thomas, B.M., Willink, R.J., Grice, K., Twitchett, R.J., Purcell, R.R., Archbold, N.W., George, A.D., Tye, S., Alexander, R., Foster, C.B., Barber, C.J., 2004. Unique marine Permian- Triassic boundary section from Western Australia. Australian Journal of Earth Sciences 51, 423-430, Origin Energy Ltd, 2011. Redback-2 W…				J1-	Redback 2 drill hole, Perth Basin	Australia	-	Kockatea Shale	Hovea	microbial laminated black mudstone ~ 1% pyrite
RB2-13	Perth Basin, Aus.	250	765.409	44.5872	95.42	741.652	154.294	359.631	10.4609	30.8388	250	4.1345	2.15247	9.73148	0.967449	0.011	0.0378403	0.778797	229.495	203.642	217.318	3.70281	Samples straddle the Late Permian-Early Triassic boundary (fossil assemblages), Thomas, B.M., Willink, R.J., Grice, K., Twitchett, R.J., Purcell, R.R., Archbold, N.W., George, A.D., Tye, S., Alexander, R., Foster, C.B., Barber, C.J., 2004. Unique marine Permian- Triassic boundary section from Western Australia. Australian Journal of Earth Sciences 51, 423-430, Origin Energy Ltd, 2011. Redback-2 W…				J1-	Redback 2 drill hole, Perth Basin	Australia	-	Kockatea Shale	Hovea	microbial laminated black mudstone ~ 1% pyrite
RB2-13	Perth Basin, Aus.	250	796.178	399.413	108.179	943.011	214.69	455.444	11.6592	37.9971	250	3.13933	1.97986	11.1038	1.0226		0.0293387	1.49782	265.412	226.193	234.136	6.38993	207.1±3.2 Ma; MSWD = 1.3					Bentong, Malaysia	Malaysia	Bentong Group	BRSZ Unit 2		Black shales with about 15% pyrite framboids
RB2-13	Perth Basin, Aus.	250	508.561	51.9455	124.178	622.264	182.499	446.62	12.1408	24.6702	250	3.32328	2.24456	10.3405	1.44116	0.011	0.0788974	1.40295	257.1	220.376	232.54	4.24752	Samples straddle the Late Permian-Early Triassic boundary (fossil assemblages), Thomas, B.M., Willink, R.J., Grice, K., Twitchett, R.J., Purcell, R.R., Archbold, N.W., George, A.D., Tye, S., Alexander, R., Foster, C.B., Barber, C.J., 2004. Unique marine Permian- Triassic boundary section from Western Australia. Australian Journal of Earth Sciences 51, 423-430, Origin Energy Ltd, 2011. Redback-2 W…				J1-	Redback 2 drill hole, Perth Basin	Australia	-	Kockatea Shale	Hovea	microbial laminated black mudstone ~ 1% pyrite
RB2-13	Perth Basin, Aus.	250	702.783	35.351	236.107	659.664	1689.63	244.039	13.1258	38.0773	250	7.84498	14.111	11.2999	0.74481		0.0125	1.36546	255.092	211.678	239.116	2.09128	207.1±3.2 Ma; MSWD = 1.3					Bentong, Malaysia	Malaysia	Bentong Group	BRSZ Unit 2		Black shales with about 15% pyrite framboids
RB2-13	Perth Basin, Aus.	250	669.034	112.68	270.111	687.998	219.588	908.112	13.1317	42.0166	250	10.286	4.30737	17.1111	1.40376		0.050381	9.2603	325.209	285.419	312.134	1.16881	207.1±3.2 Ma; MSWD = 1.3					Bentong, Malaysia	Malaysia	Bentong Group	BRSZ Unit 2		Black shales with about 15% pyrite framboids
RB2-13	Perth Basin, Aus.	250	522.407	593.704	218.753	860.634	148.746	296.985	13.4052	25.7625	250	6.92999	2.36539	9.32399	1.42942		0.0135	1.65198	304.559	257.101	289.393	3.27351	207.1±3.2 Ma; MSWD = 1.3					Bentong, Malaysia	Malaysia	Bentong Group	BRSZ Unit 2		Black shales with about 15% pyrite framboids
RB2-13	Perth Basin, Aus.	250	1523.94	522.131	441.949	1145.19	104.214	378.218	23.7724	63.6141	250	15.5771	2.91461	22.9991	2.31333	0.011	0.0788504	4.35026	625.19	551.348	585.346	6.23396	Samples straddle the Late Permian-Early Triassic boundary (fossil assemblages), Thomas, B.M., Willink, R.J., Grice, K., Twitchett, R.J., Purcell, R.R., Archbold, N.W., George, A.D., Tye, S., Alexander, R., Foster, C.B., Barber, C.J., 2004. Unique marine Permian- Triassic boundary section from Western Australia. Australian Journal of Earth Sciences 51, 423-430, Origin Energy Ltd, 2011. Redback-2 W…				J1-	Redback 2 drill hole, Perth Basin	Australia	-	Kockatea Shale	Hovea	microbial laminated black mudstone ~ 1% pyrite
RB2-18	Perth Basin, Aus.	250	84.456	149.478	244.184	34.327	43.0489	116.384	10.7301	18.2371	250	0.328004	0.879762	2.22568	0.269	0.013	0.0195	2.26636	46.7843	40.795	43.5106	0.5988	Samples straddle the Late Permian-Early Triassic boundary (fossil assemblages), Thomas, B.M., Willink, R.J., Grice, K., Twitchett, R.J., Purcell, R.R., Archbold, N.W., George, A.D., Tye, S., Alexander, R., Foster, C.B., Barber, C.J., 2004. Unique marine Permian- Triassic boundary section from Western Australia. Australian Journal of Earth Sciences 51, 423-430, Origin Energy Ltd, 2011. Redback-2 W…				J1-	Redback 2 drill hole, Perth Basin	Australia	-	Kockatea Shale	Hovea	microbial laminated black mudstone ~ 1% pyrite
RB2-18	Perth Basin, Aus.	250	1831.39	52.9844	95.0125	214.823	66.8097	331.138	13.0571	30.3062	250	1.16178	1.46082	16.1436	1.18528	0.013	0.0628252	1.39598	85.0819	73.3414	80.1385	1.28005	Samples straddle the Late Permian-Early Triassic boundary (fossil assemblages), Thomas, B.M., Willink, R.J., Grice, K., Twitchett, R.J., Purcell, R.R., Archbold, N.W., George, A.D., Tye, S., Alexander, R., Foster, C.B., Barber, C.J., 2004. Unique marine Permian- Triassic boundary section from Western Australia. Australian Journal of Earth Sciences 51, 423-430, Origin Energy Ltd, 2011. Redback-2 W…				J1-	Redback 2 drill hole, Perth Basin	Australia	-	Kockatea Shale	Hovea	laminated black-grey mudstone
RB2-18	Perth Basin, Aus.	250	1115.43	92.3533	184.276	513.795	323.329	2111.15	15.0535	175.417	250	3.74759	6.08249	38.1788	3.15423	0.013	0.115119	5.97556	205.281	185.199	197.216	2.7346	Samples straddle the Late Permian-Early Triassic boundary (fossil assemblages), Thomas, B.M., Willink, R.J., Grice, K., Twitchett, R.J., Purcell, R.R., Archbold, N.W., George, A.D., Tye, S., Alexander, R., Foster, C.B., Barber, C.J., 2004. Unique marine Permian- Triassic boundary section from Western Australia. Australian Journal of Earth Sciences 51, 423-430, Origin Energy Ltd, 2011. Redback-2 W…				J1-	Redback 2 drill hole, Perth Basin	Australia	-	Kockatea Shale	Hovea	laminated black-grey mudstone
RB2-18	Perth Basin, Aus.	250	333.815	147.406	164.425	101.321	92.1441	197.055	15.9244	35.0471	250	0.620186	1.70456	3.94606	0.660374	0.013	0.018	2.53955	73.6222	64.693	68.9346	1.53019	Samples straddle the Late Permian-Early Triassic boundary (fossil assemblages), Thomas, B.M., Willink, R.J., Grice, K., Twitchett, R.J., Purcell, R.R., Archbold, N.W., George, A.D., Tye, S., Alexander, R., Foster, C.B., Barber, C.J., 2004. Unique marine Permian- Triassic boundary section from Western Australia. Australian Journal of Earth Sciences 51, 423-430, Origin Energy Ltd, 2011. Redback-2 W…				J1-	Redback 2 drill hole, Perth Basin	Australia	-	Kockatea Shale	Hovea	microbial laminated black mudstone ~ 1% pyrite
RB2-18	Perth Basin, Aus.	250	2190.41	91.7461	155.191	343.413	93.6576	428.601	16.9577	48.3587	250	1.49732	3.02802	19.9604	1.85388	0.013	0.050777	3.93932	173.767	156.034	164.184	2.36045	Samples straddle the Late Permian-Early Triassic boundary (fossil assemblages), Thomas, B.M., Willink, R.J., Grice, K., Twitchett, R.J., Purcell, R.R., Archbold, N.W., George, A.D., Tye, S., Alexander, R., Foster, C.B., Barber, C.J., 2004. Unique marine Permian- Triassic boundary section from Western Australia. Australian Journal of Earth Sciences 51, 423-430, Origin Energy Ltd, 2011. Redback-2 W…				J1-	Redback 2 drill hole, Perth Basin	Australia	-	Kockatea Shale	Hovea	laminated black-grey mudstone
RB2-18	Perth Basin, Aus.	250	1035.1	78.9649	211.452	417.023	294.652	2968.04	21.9035	217.045	250	4.14903	7.24332	46.8157	2.34092	0.013	0.102176	7.43989	228.745	206.599	216.39	2.20724	Samples straddle the Late Permian-Early Triassic boundary (fossil assemblages), Thomas, B.M., Willink, R.J., Grice, K., Twitchett, R.J., Purcell, R.R., Archbold, N.W., George, A.D., Tye, S., Alexander, R., Foster, C.B., Barber, C.J., 2004. Unique marine Permian- Triassic boundary section from Western Australia. Australian Journal of Earth Sciences 51, 423-430, Origin Energy Ltd, 2011. Redback-2 W…				J1-	Redback 2 drill hole, Perth Basin	Australia	-	Kockatea Shale	Hovea	laminated black-grey mudstone
RB2-6	Perth Basin, Aus.	250	2951.53	22.5351	49.8922	80.8683	66.1239	63.6289	5.22063	5.00062	250	0.879539	0.184679	3.94589	0.705268		0.0355293	0.72952	31.6178	28.5356	30.5115	0.728163	Samples straddle the Late Permian-Early Triassic boundary (fossil assemblages), Thomas, B.M., Willink, R.J., Grice, K., Twitchett, R.J., Purcell, R.R., Archbold, N.W., George, A.D., Tye, S., Alexander, R., Foster, C.B., Barber, C.J., 2004. Unique marine Permian- Triassic boundary section from Western Australia. Australian Journal of Earth Sciences 51, 423-430, Origin Energy Ltd, 2011. Redback-2 W…				J1-	Redback 2 drill hole, Perth Basin	Australia	-	Kockatea Shale	Hovea	laminated black-grey mudstone
RB2-6	Perth Basin, Aus.	250	3100.5	21.1238	44.4625	101.628	58.9564	89.7217	6.44341	6.237	250	0.554332	0.19284	5.49813	1.41348		0.0387663	0.206702	39.487	37.2392	37.9454	1.38912	Samples straddle the Late Permian-Early Triassic boundary (fossil assemblages), Thomas, B.M., Willink, R.J., Grice, K., Twitchett, R.J., Purcell, R.R., Archbold, N.W., George, A.D., Tye, S., Alexander, R., Foster, C.B., Barber, C.J., 2004. Unique marine Permian- Triassic boundary section from Western Australia. Australian Journal of Earth Sciences 51, 423-430, Origin Energy Ltd, 2011. Redback-2 W…				J1-	Redback 2 drill hole, Perth Basin	Australia	-	Kockatea Shale	Hovea	laminated black-grey mudstone
RB2-6	Perth Basin, Aus.	250	3445.6	19.7684	40.7398	118.877	71.5042	79.147	6.51649	5.45793	250	0.504854	0.125868	6.7278	1.19477		0.0358988	0.219441	43.6509	39.1209	41.2463	1.2908	Samples straddle the Late Permian-Early Triassic boundary (fossil assemblages), Thomas, B.M., Willink, R.J., Grice, K., Twitchett, R.J., Purcell, R.R., Archbold, N.W., George, A.D., Tye, S., Alexander, R., Foster, C.B., Barber, C.J., 2004. Unique marine Permian- Triassic boundary section from Western Australia. Australian Journal of Earth Sciences 51, 423-430, Origin Energy Ltd, 2011. Redback-2 W…				J1-	Redback 2 drill hole, Perth Basin	Australia	-	Kockatea Shale	Hovea	laminated black-grey mudstone
RB2-6	Perth Basin, Aus.	250	478.614	318.269	292.083	915.759	54.6537	182.58	10.7833	12.9978	250	1.9534	0.428674	11.2745	2.23735		0.0503677	1.29086	294.785	257.146	276.121	4.34249	Samples straddle the Late Permian-Early Triassic boundary (fossil assemblages), Thomas, B.M., Willink, R.J., Grice, K., Twitchett, R.J., Purcell, R.R., Archbold, N.W., George, A.D., Tye, S., Alexander, R., Foster, C.B., Barber, C.J., 2004. Unique marine Permian- Triassic boundary section from Western Australia. Australian Journal of Earth Sciences 51, 423-430, Origin Energy Ltd, 2011. Redback-2 W…				J1-	Redback 2 drill hole, Perth Basin	Australia	-	Kockatea Shale	Hovea	laminated black-grey mudstone
RB2-6	Perth Basin, Aus.	250	503.969	90.0454	147.895	452.211	99.1916	316.955	11.0863	8.86319	250	1.04443	0.848208	14.9283	1.9767			0.809981	180.757	152.813	156.125	2.23661	Samples straddle the Late Permian-Early Triassic boundary (fossil assemblages), Thomas, B.M., Willink, R.J., Grice, K., Twitchett, R.J., Purcell, R.R., Archbold, N.W., George, A.D., Tye, S., Alexander, R., Foster, C.B., Barber, C.J., 2004. Unique marine Permian- Triassic boundary section from Western Australia. Australian Journal of Earth Sciences 51, 423-430, Origin Energy Ltd, 2011. Redback-2 W…				J1-	Redback 2 drill hole, Perth Basin	Australia	-	Kockatea Shale	Hovea	laminated black-grey mudstone
RB2-6	Perth Basin, Aus.	250	10349.4	205.914	314.968	738.576	99.5628	237.242	12.7475	15.8701	250	3.09793	1.16693	15.9595	2.80486		0.10207	1.1726	295.91	262.615	274.305	3.94528	Samples straddle the Late Permian-Early Triassic boundary (fossil assemblages), Thomas, B.M., Willink, R.J., Grice, K., Twitchett, R.J., Purcell, R.R., Archbold, N.W., George, A.D., Tye, S., Alexander, R., Foster, C.B., Barber, C.J., 2004. Unique marine Permian- Triassic boundary section from Western Australia. Australian Journal of Earth Sciences 51, 423-430, Origin Energy Ltd, 2011. Redback-2 W…				J1-	Redback 2 drill hole, Perth Basin	Australia	-	Kockatea Shale	Hovea	laminated black-grey mudstone
RB2-6	Perth Basin, Aus.	250	5765.87	703.686	419.316	1950.34	101.485	223.975	25.1553	17.07	250	3.04794	1.51235	24.4624	3.01489		0.0647732	1.05486	554.186	486.096	517.994	8.26002	Samples straddle the Late Permian-Early Triassic boundary (fossil assemblages), Thomas, B.M., Willink, R.J., Grice, K., Twitchett, R.J., Purcell, R.R., Archbold, N.W., George, A.D., Tye, S., Alexander, R., Foster, C.B., Barber, C.J., 2004. Unique marine Permian- Triassic boundary section from Western Australia. Australian Journal of Earth Sciences 51, 423-430, Origin Energy Ltd, 2011. Redback-2 W…				J1-	Redback 2 drill hole, Perth Basin	Australia	-	Kockatea Shale	Hovea	laminated black-grey mudstone
RB2-26	Perth Basin, Aus.	252	349.572	20.0065	48.1629	159.699	77.1099	177.885	3.5435	3.31318	252	1.15604	0.305	5.17773	0.648921	0.0405	0.022	1.14197	72.13	59.5395	66.033	0.347228	Samples straddle the Late Permian-Early Triassic boundary (fossil assemblages), Thomas, B.M., Willink, R.J., Grice, K., Twitchett, R.J., Purcell, R.R., Archbold, N.W., George, A.D., Tye, S., Alexander, R., Foster, C.B., Barber, C.J., 2004. Unique marine Permian- Triassic boundary section from Western Australia. Australian Journal of Earth Sciences 51, 423-430, Origin Energy Ltd, 2011. Redback-2 W…				J1-	Redback 2 drill hole, Perth Basin	Australia	-	Kockatea Shale	Hovea	dark black mudstone
RB2-26	Perth Basin, Aus.	252	587.097	64.2994	202.338	358.666	64.047	190.68	8.39131	16.5119	252	3.38661	2.43023	5.39961	0.3165	0.0405	0.0215	5.99717	148.905	133.894	140.486	0.947226					K4-	Otago	New Zeland				black shales
RB2-26	Perth Basin, Aus.	252	663.046	13.0207	105.67	241.534	48.1377	310.461	10.9213	30.9977	252	2.8993	1.25913	17.0075	0.960027	0.0405	0.0215	8.97415	24.3343	21.3443	23.0455	0.200357					K4-	Otago	New Zeland				black shales
RB2-26	Perth Basin, Aus.	252	735.25	45.952	168.452	421.651	49.5597	371.1	11.8705	34.7283	252	3.68864	3.06035	33.4573	0.987183	0.041	0.0465131	8.22698	101.326	94.1332	97.7485	1.20097					K4-	Otago	New Zeland				black shales
RB2-26	Perth Basin, Aus.	252	1156.05	91.4878	156.586	467.587	867.287	854.455	14.1343	36.7695	252	9.07751	4.76473	17.7304	1.73305	0.041	0.0448608	31.9223	210.71	188.314	200.315	2.54503					K4-	Otago	New Zeland				black shales
RB2-26	Perth Basin, Aus.	252	588.491	68.7086	259.933	690.281	74.0319	735.539	14.4317	27.034	252	5.33802	1.8151	6.80379	1.96293	0.11506	0.0689266	3.44332	261.267	242.871	261.352	0.944648					K4-	Otago	New Zeland				black shales
RB2-26	Perth Basin, Aus.	252	2712.84	50.8872	151.449	176.461	77.8385	246.971	14.7585	12.7602	252	1.22269	0.3065	15.6903	1.64792	0.041	0.192654	0.883352	73.7329	69.7501	70.1521	0.805694	Samples straddle the Late Permian-Early Triassic boundary (fossil assemblages), Thomas, B.M., Willink, R.J., Grice, K., Twitchett, R.J., Purcell, R.R., Archbold, N.W., George, A.D., Tye, S., Alexander, R., Foster, C.B., Barber, C.J., 2004. Unique marine Permian- Triassic boundary section from Western Australia. Australian Journal of Earth Sciences 51, 423-430, Origin Energy Ltd, 2011. Redback-2 W…				J1-	Redback 2 drill hole, Perth Basin	Australia	-	Kockatea Shale	Hovea	dark black mudstone
RB2-26	Perth Basin, Aus.	252	251.727	37.9406	129.029	265.062	39.6843	155.019	17.0355	12.1675	252	2.02876	3.49938	9.2448	1.2075	0.165	0.1015	3.35011	105.159	94.0209	100.454	0.636956	Samples straddle the Late Permian-Early Triassic boundary (fossil assemblages), Thomas, B.M., Willink, R.J., Grice, K., Twitchett, R.J., Purcell, R.R., Archbold, N.W., George, A.D., Tye, S., Alexander, R., Foster, C.B., Barber, C.J., 2004. Unique marine Permian- Triassic boundary section from Western Australia. Australian Journal of Earth Sciences 51, 423-430, Origin Energy Ltd, 2011. Redback-2 W…				J1-	Redback 2 drill hole, Perth Basin	Australia	-	Kockatea Shale	Hovea	laminated black-grey mudstone
RB2-26	Perth Basin, Aus.	252	561.722	47.8362	154.492	298.988	67.3534	534.814	17.4875	34.1066	252	4.33135	3.09636	30.0245	1.5475	0.1535	0.119	9.45684	102.731	89.3987	94.9449	0.731825					K4-	Otago	New Zeland				black shales
RB2-26	Perth Basin, Aus.	252	313.521	90.7453	312.645	555.111	78.7678	432.767	18.617	34.7592	252	4.71426	3.29953	21.0146	2.8305	0.291	0.151	9.57776	276.056	249.055	270.188	1.23055	Samples straddle the Late Permian-Early Triassic boundary (fossil assemblages), Thomas, B.M., Willink, R.J., Grice, K., Twitchett, R.J., Purcell, R.R., Archbold, N.W., George, A.D., Tye, S., Alexander, R., Foster, C.B., Barber, C.J., 2004. Unique marine Permian- Triassic boundary section from Western Australia. Australian Journal of Earth Sciences 51, 423-430, Origin Energy Ltd, 2011. Redback-2 W…				J1-	Redback 2 drill hole, Perth Basin	Australia	-	Kockatea Shale	Hovea	laminated black-grey mudstone
RB2-26	Perth Basin, Aus.	252	1226.29	78.7281	159.057	165.635	37.423	172.745	18.8606	11.2697	252	0.618685	0.309	8.84639	0.323	0.0415	0.115646	0.963522	76.9261	71.135	73.417	0.380317	Samples straddle the Late Permian-Early Triassic boundary (fossil assemblages), Thomas, B.M., Willink, R.J., Grice, K., Twitchett, R.J., Purcell, R.R., Archbold, N.W., George, A.D., Tye, S., Alexander, R., Foster, C.B., Barber, C.J., 2004. Unique marine Permian- Triassic boundary section from Western Australia. Australian Journal of Earth Sciences 51, 423-430, Origin Energy Ltd, 2011. Redback-2 W…				J1-	Redback 2 drill hole, Perth Basin	Australia	-	Kockatea Shale	Hovea	dark black mudstone
RB2-26	Perth Basin, Aus.	252	510.722	40.4936	150.922	241.591	68.7478	580.832	19.0505	41.6807	252	3.20627	1.9505	27.8907	2.0565	0.2275	0.1395	10.5215	74.2638	64.2396	69.4546	0.614518	Samples straddle the Late Permian-Early Triassic boundary (fossil assemblages), Thomas, B.M., Willink, R.J., Grice, K., Twitchett, R.J., Purcell, R.R., Archbold, N.W., George, A.D., Tye, S., Alexander, R., Foster, C.B., Barber, C.J., 2004. Unique marine Permian- Triassic boundary section from Western Australia. Australian Journal of Earth Sciences 51, 423-430, Origin Energy Ltd, 2011. Redback-2 W…				J1-	Redback 2 drill hole, Perth Basin	Australia	-	Kockatea Shale	Hovea	laminated black-grey mudstone
RB2-26	Perth Basin, Aus.	252	5224.23	191.534	420.56	865.703	6362.09	548.037	20.9031	24.5177	252	2.877	30.1234	28.7601	4.40663	0.035	0.122329	1.59549	454.291	414.3	436.31	4.41816					K4-	Otago	New Zeland				black shales
RB2-26	Perth Basin, Aus.	252	1801.85	47.2116	148.965	150.449	198.809	182.458	23.2346	10.6159	252	0.563886	1.25574	10.9445	1.69173	0.0415	0.111972	0.903028	61.8918	56.0986	58.7747	0.413717	Samples straddle the Late Permian-Early Triassic boundary (fossil assemblages), Thomas, B.M., Willink, R.J., Grice, K., Twitchett, R.J., Purcell, R.R., Archbold, N.W., George, A.D., Tye, S., Alexander, R., Foster, C.B., Barber, C.J., 2004. Unique marine Permian- Triassic boundary section from Western Australia. Australian Journal of Earth Sciences 51, 423-430, Origin Energy Ltd, 2011. Redback-2 W…				J1-	Redback 2 drill hole, Perth Basin	Australia	-	Kockatea Shale	Hovea	dark black mudstone
RB2-26	Perth Basin, Aus.	252	2185.21	56.3274	147.263	190.255	791.321	438.356	25.6972	12.8768	252	0.93223	5.58362	13.6061	1.83135	0.0155755	0.13079	0.799631	80.8742	73.476	79.9157	0.709043	Samples straddle the Late Permian-Early Triassic boundary (fossil assemblages), Thomas, B.M., Willink, R.J., Grice, K., Twitchett, R.J., Purcell, R.R., Archbold, N.W., George, A.D., Tye, S., Alexander, R., Foster, C.B., Barber, C.J., 2004. Unique marine Permian- Triassic boundary section from Western Australia. Australian Journal of Earth Sciences 51, 423-430, Origin Energy Ltd, 2011. Redback-2 W…				J1-	Redback 2 drill hole, Perth Basin	Australia	-	Kockatea Shale	Hovea	dark black mudstone
RB2-26	Perth Basin, Aus.	252	949.959	357.601	556.538	704.824	175.277	627.183	28.887	79.3239	252	5.67894	3.30557	48.6006	1.9465	0.274	0.2375	12.3889	390.329	345.63	389.764	3.13277	Samples straddle the Late Permian-Early Triassic boundary (fossil assemblages), Thomas, B.M., Willink, R.J., Grice, K., Twitchett, R.J., Purcell, R.R., Archbold, N.W., George, A.D., Tye, S., Alexander, R., Foster, C.B., Barber, C.J., 2004. Unique marine Permian- Triassic boundary section from Western Australia. Australian Journal of Earth Sciences 51, 423-430, Origin Energy Ltd, 2011. Redback-2 W…				J1-	Redback 2 drill hole, Perth Basin	Australia	-	Kockatea Shale	Hovea	laminated black-grey mudstone
RB2-26	Perth Basin, Aus.	252	568.756	44.2993	163.182	409.757	98.9224	652.816	29.017	46.1278	252	2.53239	3.9355	31.8785	4.681	0.4215	0.2215	7.6582	162.592	144.304	149.038	1.45828	Samples straddle the Late Permian-Early Triassic boundary (fossil assemblages), Thomas, B.M., Willink, R.J., Grice, K., Twitchett, R.J., Purcell, R.R., Archbold, N.W., George, A.D., Tye, S., Alexander, R., Foster, C.B., Barber, C.J., 2004. Unique marine Permian- Triassic boundary section from Western Australia. Australian Journal of Earth Sciences 51, 423-430, Origin Energy Ltd, 2011. Redback-2 W…				J1-	Redback 2 drill hole, Perth Basin	Australia	-	Kockatea Shale	Hovea	laminated black-grey mudstone
RB2-26	Perth Basin, Aus.	252	7044.25	63.2564	325.32	926.585	3131.88	516.246	31.4501	18.4251	252	5.28993	18.2121	30.4989	7.87258	0.0487708	0.320343	1.36802	410.85	364.288	398.913	4.32318
RB2-26	Perth Basin, Aus.	252	872.118	81.9108	189.847	400.799	103.042	602.406	42.3315	49.7714	252	4.65516	5.06091	31.8062	4.094	0.3685	0.195	7.88305	139.628	123.909	133.975	1.61696	Samples straddle the Late Permian-Early Triassic boundary (fossil assemblages), Thomas, B.M., Willink, R.J., Grice, K., Twitchett, R.J., Purcell, R.R., Archbold, N.W., George, A.D., Tye, S., Alexander, R., Foster, C.B., Barber, C.J., 2004. Unique marine Permian- Triassic boundary section from Western Australia. Australian Journal of Earth Sciences 51, 423-430, Origin Energy Ltd, 2011. Redback-2 W…				J1-	Redback 2 drill hole, Perth Basin	Australia	-	Kockatea Shale	Hovea	laminated black-grey mudstone
RB2-26	Perth Basin, Aus.	252	568.374	86.0657	296.756	840.995	88.7725	611.669	44.3825	51.1192	252	4.38677	3.889	42.8076	3.002	0.343	0.226	13.7011	276.872	249.79	291.267	2.21568	Samples straddle the Late Permian-Early Triassic boundary (fossil assemblages), Thomas, B.M., Willink, R.J., Grice, K., Twitchett, R.J., Purcell, R.R., Archbold, N.W., George, A.D., Tye, S., Alexander, R., Foster, C.B., Barber, C.J., 2004. Unique marine Permian- Triassic boundary section from Western Australia. Australian Journal of Earth Sciences 51, 423-430, Origin Energy Ltd, 2011. Redback-2 W…				J1-	Redback 2 drill hole, Perth Basin	Australia	-	Kockatea Shale	Hovea	laminated black-grey mudstone
RB2-26	Perth Basin, Aus.	252	1925.32	70.9498	231.325	479.872	248.52	364.327	49.04	42.6117	252	0.9045	3.8955	24.6206	6.2735	0.4885	0.326	7.53154	246.505	201.909	211.692	1.57996	Samples straddle the Late Permian-Early Triassic boundary (fossil assemblages), Thomas, B.M., Willink, R.J., Grice, K., Twitchett, R.J., Purcell, R.R., Archbold, N.W., George, A.D., Tye, S., Alexander, R., Foster, C.B., Barber, C.J., 2004. Unique marine Permian- Triassic boundary section from Western Australia. Australian Journal of Earth Sciences 51, 423-430, Origin Energy Ltd, 2011. Redback-2 W…				J1-	Redback 2 drill hole, Perth Basin	Australia	-	Kockatea Shale	Hovea	laminated black-grey mudstone
RB2-28	Perth Basin, Aus.	252	3.72055	643.167	590.325	74.5914	16.8747	1999.52	20.0215	2.64123	252	9.99851	0.107	13.7576	4.95392	0.016	0.0757217	2.50561	312.328	286.838	304.761	9.34565	Samples straddle the Late Permian-Early Triassic boundary (fossil assemblages), Thomas, B.M., Willink, R.J., Grice, K., Twitchett, R.J., Purcell, R.R., Archbold, N.W., George, A.D., Tye, S., Alexander, R., Foster, C.B., Barber, C.J., 2004. Unique marine Permian- Triassic boundary section from Western Australia. Australian Journal of Earth Sciences 51, 423-430, Origin Energy Ltd, 2011. Redback-2 W…				J1-	Redback 2 drill hole, Perth Basin	Australia	-	Kockatea Shale	Hovea	dark black mudstone
RB2-28	Perth Basin, Aus.	252	4.40348	878.053	565.495	68.9161	19.2029	1252.42	20.3478	14.4926	252	9.68038	0.105	17.0357	7.08535	0.016	0.0678877	16.3363	313.191	283.568	301.613	12.6763	Samples straddle the Late Permian-Early Triassic boundary (fossil assemblages), Thomas, B.M., Willink, R.J., Grice, K., Twitchett, R.J., Purcell, R.R., Archbold, N.W., George, A.D., Tye, S., Alexander, R., Foster, C.B., Barber, C.J., 2004. Unique marine Permian- Triassic boundary section from Western Australia. Australian Journal of Earth Sciences 51, 423-430, Origin Energy Ltd, 2011. Redback-2 W…				J1-	Redback 2 drill hole, Perth Basin	Australia	-	Kockatea Shale	Hovea	dark black mudstone
RB2-28	Perth Basin, Aus.	252	12.2232	40.2865	817.931	116.511	25.6659	3297.47	21.6073	144.726	252	0.93812	4.20737	71.8877		1.4335	0.0167452	45.5247	112.23	99.0995	105.879	0.238517	Samples straddle the Late Permian-Early Triassic boundary (fossil assemblages), Thomas, B.M., Willink, R.J., Grice, K., Twitchett, R.J., Purcell, R.R., Archbold, N.W., George, A.D., Tye, S., Alexander, R., Foster, C.B., Barber, C.J., 2004. Unique marine Permian- Triassic boundary section from Western Australia. Australian Journal of Earth Sciences 51, 423-430, Origin Energy Ltd, 2011. Redback-2 W…				J1-	Redback 2 drill hole, Perth Basin	Australia	-	Kockatea Shale	Hovea	dark black mudstone
RB2-28	Perth Basin, Aus.	252	9.5668	852.238	826.735	70.7934	12.3676	2508.03	24.0273	5.25098	252	9.09327	0.1255	18.2832	8.50389	0.016	0.0613043	3.40408	307.51	278.895	295.872	18.1299	Samples straddle the Late Permian-Early Triassic boundary (fossil assemblages), Thomas, B.M., Willink, R.J., Grice, K., Twitchett, R.J., Purcell, R.R., Archbold, N.W., George, A.D., Tye, S., Alexander, R., Foster, C.B., Barber, C.J., 2004. Unique marine Permian- Triassic boundary section from Western Australia. Australian Journal of Earth Sciences 51, 423-430, Origin Energy Ltd, 2011. Redback-2 W…				J1-	Redback 2 drill hole, Perth Basin	Australia	-	Kockatea Shale	Hovea	dark black mudstone
RB2-28	Perth Basin, Aus.	252		1062.41	627.999	63.9593	23.3689	1087.63	24.7299	6.61467	252	5.16642	0.125	27.0983	10.5529	0.016	0.0264409	16.3565	292.837	265.109	280.445	16.2915	Samples straddle the Late Permian-Early Triassic boundary (fossil assemblages), Thomas, B.M., Willink, R.J., Grice, K., Twitchett, R.J., Purcell, R.R., Archbold, N.W., George, A.D., Tye, S., Alexander, R., Foster, C.B., Barber, C.J., 2004. Unique marine Permian- Triassic boundary section from Western Australia. Australian Journal of Earth Sciences 51, 423-430, Origin Energy Ltd, 2011. Redback-2 W…				J1-	Redback 2 drill hole, Perth Basin	Australia	-	Kockatea Shale	Hovea	dark black mudstone
RB2-28	Perth Basin, Aus.	252	1850.11	941.115	618.198	83.2113	25.3007	1331.45	29.5406	3.19019	252	10.5911	0.116	20.9697	10.2714	0.016	0.0853641	19.8644	375.202	333.903	354.611	17.9198	Samples straddle the Late Permian-Early Triassic boundary (fossil assemblages), Thomas, B.M., Willink, R.J., Grice, K., Twitchett, R.J., Purcell, R.R., Archbold, N.W., George, A.D., Tye, S., Alexander, R., Foster, C.B., Barber, C.J., 2004. Unique marine Permian- Triassic boundary section from Western Australia. Australian Journal of Earth Sciences 51, 423-430, Origin Energy Ltd, 2011. Redback-2 W…				J1-	Redback 2 drill hole, Perth Basin	Australia	-	Kockatea Shale	Hovea	dark black mudstone
RB2-28	Perth Basin, Aus.	252	5.90019	712.523	800.965	69.8621	14.3657	627.012	35.045	1.228	252	18.4373	3.773	16.7362	15.035	1.4335	0.2605	4.46836	372.064	337.99	363.553	30.8018	Samples straddle the Late Permian-Early Triassic boundary (fossil assemblages), Thomas, B.M., Willink, R.J., Grice, K., Twitchett, R.J., Purcell, R.R., Archbold, N.W., George, A.D., Tye, S., Alexander, R., Foster, C.B., Barber, C.J., 2004. Unique marine Permian- Triassic boundary section from Western Australia. Australian Journal of Earth Sciences 51, 423-430, Origin Energy Ltd, 2011. Redback-2 W…				J1-	Redback 2 drill hole, Perth Basin	Australia	-	Kockatea Shale	Hovea	dark black mudstone
RB2-28	Perth Basin, Aus.	252	160.657	1566.73	998.884	112.135	25.6538	1653.77	39.7584	6.42648	252	12.0101	0.1285	36.7586	15.6784	0.016	0.0913787	26.4822	490.735	440.727	470.919	28.429	Samples straddle the Late Permian-Early Triassic boundary (fossil assemblages), Thomas, B.M., Willink, R.J., Grice, K., Twitchett, R.J., Purcell, R.R., Archbold, N.W., George, A.D., Tye, S., Alexander, R., Foster, C.B., Barber, C.J., 2004. Unique marine Permian- Triassic boundary section from Western Australia. Australian Journal of Earth Sciences 51, 423-430, Origin Energy Ltd, 2011. Redback-2 W…				J1-	Redback 2 drill hole, Perth Basin	Australia	-	Kockatea Shale	Hovea	dark black mudstone
RB2-28	Perth Basin, Aus.	252	0.800325	1204.06	1186.04	125.434	3.73055	2013.21	46.4079	13.4237	252	11.4535	0.1195	34.6044	10.2562	0.016	0.0961917	13.65	527.596	473.852	504.119	8.14944	Samples straddle the Late Permian-Early Triassic boundary (fossil assemblages), Thomas, B.M., Willink, R.J., Grice, K., Twitchett, R.J., Purcell, R.R., Archbold, N.W., George, A.D., Tye, S., Alexander, R., Foster, C.B., Barber, C.J., 2004. Unique marine Permian- Triassic boundary section from Western Australia. Australian Journal of Earth Sciences 51, 423-430, Origin Energy Ltd, 2011. Redback-2 W…				J1-	Redback 2 drill hole, Perth Basin	Australia	-	Kockatea Shale	Hovea	dark black mudstone
RB2-28	Perth Basin, Aus.	252	5.92696	1138.92	780.496	48.115	22.814	1984.44	52.5269	15.2146	252	4.61517	0.133	33.9573	16.3996	1.4335	0.0105	22.8223	378.961	341.272	365.725	41.14	Samples straddle the Late Permian-Early Triassic boundary (fossil assemblages), Thomas, B.M., Willink, R.J., Grice, K., Twitchett, R.J., Purcell, R.R., Archbold, N.W., George, A.D., Tye, S., Alexander, R., Foster, C.B., Barber, C.J., 2004. Unique marine Permian- Triassic boundary section from Western Australia. Australian Journal of Earth Sciences 51, 423-430, Origin Energy Ltd, 2011. Redback-2 W…				J1-	Redback 2 drill hole, Perth Basin	Australia	-	Kockatea Shale	Hovea	dark black mudstone
RB2-28	Perth Basin, Aus.	252	2.2219	1000.8	1344.28	118.179	1.12916	2145.52	52.9088	12.3921	252	9.57385	0.124	36.1432	9.22457	0.016	0.0843818	8.29988	520.131	470.135	503.032	6.75517	Samples straddle the Late Permian-Early Triassic boundary (fossil assemblages), Thomas, B.M., Willink, R.J., Grice, K., Twitchett, R.J., Purcell, R.R., Archbold, N.W., George, A.D., Tye, S., Alexander, R., Foster, C.B., Barber, C.J., 2004. Unique marine Permian- Triassic boundary section from Western Australia. Australian Journal of Earth Sciences 51, 423-430, Origin Energy Ltd, 2011. Redback-2 W…				J1-	Redback 2 drill hole, Perth Basin	Australia	-	Kockatea Shale	Hovea	dark black mudstone
RB2-28	Perth Basin, Aus.	252	89.7353	1580.14	1098.74	106.691	57.8097	2704.28	55.4341	14.8219	252	7.16545	0.136	41.354	25.2151	1.4335	0.0288264	37.8443	551.685	505.304	534.209	66.5915	Samples straddle the Late Permian-Early Triassic boundary (fossil assemblages), Thomas, B.M., Willink, R.J., Grice, K., Twitchett, R.J., Purcell, R.R., Archbold, N.W., George, A.D., Tye, S., Alexander, R., Foster, C.B., Barber, C.J., 2004. Unique marine Permian- Triassic boundary section from Western Australia. Australian Journal of Earth Sciences 51, 423-430, Origin Energy Ltd, 2011. Redback-2 W…				J1-	Redback 2 drill hole, Perth Basin	Australia	-	Kockatea Shale	Hovea	dark black mudstone
RB2-28	Perth Basin, Aus.	252	427.229	1444.46	1949.42	131.22	7.75582	1870.2	61.8433	11.1171	252	8.97388	0.201456	43.1721	10.3311	1.4335	0.054474	7.25751	625.117	566.11	602.829	7.94817	Samples straddle the Late Permian-Early Triassic boundary (fossil assemblages), Thomas, B.M., Willink, R.J., Grice, K., Twitchett, R.J., Purcell, R.R., Archbold, N.W., George, A.D., Tye, S., Alexander, R., Foster, C.B., Barber, C.J., 2004. Unique marine Permian- Triassic boundary section from Western Australia. Australian Journal of Earth Sciences 51, 423-430, Origin Energy Ltd, 2011. Redback-2 W…				J1-	Redback 2 drill hole, Perth Basin	Australia	-	Kockatea Shale	Hovea	dark black mudstone
RB2-28	Perth Basin, Aus.	252	6.44474	1133.54	2378.12	251.322	10.8833	3128.21	90.9802	187.458	252	22.1802	2.86795	50.3362	0.821699	1.4335	0.121916	143.541	593.278	538.021	581.854	0.0477137	Samples straddle the Late Permian-Early Triassic boundary (fossil assemblages), Thomas, B.M., Willink, R.J., Grice, K., Twitchett, R.J., Purcell, R.R., Archbold, N.W., George, A.D., Tye, S., Alexander, R., Foster, C.B., Barber, C.J., 2004. Unique marine Permian- Triassic boundary section from Western Australia. Australian Journal of Earth Sciences 51, 423-430, Origin Energy Ltd, 2011. Redback-2 W…				J1-	Redback 2 drill hole, Perth Basin	Australia	-	Kockatea Shale	Hovea	dark black mudstone
RB2-28	Perth Basin, Aus.	252	20.0305	749.103	2702.33	253.304	15.969	3076.86	177.2	190.64	252	13.1796	8.548	51.4097	15.8115	1.4335	1.0325	121.112	348.5	315.861	336.973	0.6255	Samples straddle the Late Permian-Early Triassic boundary (fossil assemblages), Thomas, B.M., Willink, R.J., Grice, K., Twitchett, R.J., Purcell, R.R., Archbold, N.W., George, A.D., Tye, S., Alexander, R., Foster, C.B., Barber, C.J., 2004. Unique marine Permian- Triassic boundary section from Western Australia. Australian Journal of Earth Sciences 51, 423-430, Origin Energy Ltd, 2011. Redback-2 W…				J1-	Redback 2 drill hole, Perth Basin	Australia	-	Kockatea Shale	Hovea	dark black mudstone
RB2-28	Perth Basin, Aus.	252	16.6645	710.594	472.214	107.472	29.6355	5519	215.034	5.3985	252	21.9572	10.373	7.24443	19.1875	1.4335	1.253	108.686	441.831	449.51	436.387	21.369	Samples straddle the Late Permian-Early Triassic boundary (fossil assemblages), Thomas, B.M., Willink, R.J., Grice, K., Twitchett, R.J., Purcell, R.R., Archbold, N.W., George, A.D., Tye, S., Alexander, R., Foster, C.B., Barber, C.J., 2004. Unique marine Permian- Triassic boundary section from Western Australia. Australian Journal of Earth Sciences 51, 423-430, Origin Energy Ltd, 2011. Redback-2 W…				J1-	Redback 2 drill hole, Perth Basin	Australia	-	Kockatea Shale	Hovea	dark black mudstone
RB2-30	Perth Basin, Aus.	252	1139.97	210.453	180.025	384.636	295.323	836.019	12.9269	104.001	252	1.74835	3.12037	10.912	1.31122	0.023	0.0332018	11.2343	195.474	175.452	186.219	3.03752	Samples straddle the Late Permian-Early Triassic boundary (fossil assemblages), Thomas, B.M., Willink, R.J., Grice, K., Twitchett, R.J., Purcell, R.R., Archbold, N.W., George, A.D., Tye, S., Alexander, R., Foster, C.B., Barber, C.J., 2004. Unique marine Permian- Triassic boundary section from Western Australia. Australian Journal of Earth Sciences 51, 423-430, Origin Energy Ltd, 2011. Redback-2 W…				J1-	Redback 2 drill hole, Perth Basin	Australia	-	Kockatea Shale	Hovea	dark black mudstone
RB2-30	Perth Basin, Aus.	252	225.469	478.495	2823.18	200.572	5.85571	1421.63	21.9397	177.822	252	11.8038	3.12495	52.8599	0.126	0.023	0.0746635	43.0983	583.729	537.423	563.544	0.111774	Samples straddle the Late Permian-Early Triassic boundary (fossil assemblages), Thomas, B.M., Willink, R.J., Grice, K., Twitchett, R.J., Purcell, R.R., Archbold, N.W., George, A.D., Tye, S., Alexander, R., Foster, C.B., Barber, C.J., 2004. Unique marine Permian- Triassic boundary section from Western Australia. Australian Journal of Earth Sciences 51, 423-430, Origin Energy Ltd, 2011. Redback-2 W…				J1-	Redback 2 drill hole, Perth Basin	Australia	-	Kockatea Shale	Hovea	dark black mudstone
RB2-30	Perth Basin, Aus.	252	1947.81	665.759	2348.78	171.809	13.2834	1167.06	25.2721	135.936	252	10.6448	1.82295	42.5293	0.396523	0.023	0.0702397	31.3916	471.318	437.816	447.836	0.662145	Samples straddle the Late Permian-Early Triassic boundary (fossil assemblages), Thomas, B.M., Willink, R.J., Grice, K., Twitchett, R.J., Purcell, R.R., Archbold, N.W., George, A.D., Tye, S., Alexander, R., Foster, C.B., Barber, C.J., 2004. Unique marine Permian- Triassic boundary section from Western Australia. Australian Journal of Earth Sciences 51, 423-430, Origin Energy Ltd, 2011. Redback-2 W…				J1-	Redback 2 drill hole, Perth Basin	Australia	-	Kockatea Shale	Hovea	dark black mudstone
RB2-30	Perth Basin, Aus.	252	5.82568	670.258	2618.67	225.976	7.8841	1343.97	27.8333	164.528	252	14.1586	3.15429	46.838	0.1385	0.023	0.099984	47.7636	555.818	511.94	535.532	0.228385	Samples straddle the Late Permian-Early Triassic boundary (fossil assemblages), Thomas, B.M., Willink, R.J., Grice, K., Twitchett, R.J., Purcell, R.R., Archbold, N.W., George, A.D., Tye, S., Alexander, R., Foster, C.B., Barber, C.J., 2004. Unique marine Permian- Triassic boundary section from Western Australia. Australian Journal of Earth Sciences 51, 423-430, Origin Energy Ltd, 2011. Redback-2 W…				J1-	Redback 2 drill hole, Perth Basin	Australia	-	Kockatea Shale	Hovea	dark black mudstone
RB2-30	Perth Basin, Aus.	252	31.3801	751.097	2604.05	168.783	42.8111	1338.44	29.2709	152.912	252	12.4973	2.91607	47.274	0.1925	0.023	0.0792143	32.9547	512.554	466.124	489.089	0.403713	Samples straddle the Late Permian-Early Triassic boundary (fossil assemblages), Thomas, B.M., Willink, R.J., Grice, K., Twitchett, R.J., Purcell, R.R., Archbold, N.W., George, A.D., Tye, S., Alexander, R., Foster, C.B., Barber, C.J., 2004. Unique marine Permian- Triassic boundary section from Western Australia. Australian Journal of Earth Sciences 51, 423-430, Origin Energy Ltd, 2011. Redback-2 W…				J1-	Redback 2 drill hole, Perth Basin	Australia	-	Kockatea Shale	Hovea	dark black mudstone
RB2-30	Perth Basin, Aus.	252	16.1613	979.496	3010.47	272.203	10.3121	1465.31	30.3342	173.458	252	15.5458	2.88889	54.9068	0.465965	0.023	0.10371	55.385	689.927	631.056	681.019	0.629084	Samples straddle the Late Permian-Early Triassic boundary (fossil assemblages), Thomas, B.M., Willink, R.J., Grice, K., Twitchett, R.J., Purcell, R.R., Archbold, N.W., George, A.D., Tye, S., Alexander, R., Foster, C.B., Barber, C.J., 2004. Unique marine Permian- Triassic boundary section from Western Australia. Australian Journal of Earth Sciences 51, 423-430, Origin Energy Ltd, 2011. Redback-2 W…				J1-	Redback 2 drill hole, Perth Basin	Australia	-	Kockatea Shale	Hovea	dark black mudstone
RB2-30	Perth Basin, Aus.	252	35.952	773.563	2517.36	178.116	41.9186	1270.49	31.039	142.815	252	13.4233	2.49367	48.1054	0.470892	0.023	0.0879716	30.7598	557.513	504.541	531.746	0.636063	Samples straddle the Late Permian-Early Triassic boundary (fossil assemblages), Thomas, B.M., Willink, R.J., Grice, K., Twitchett, R.J., Purcell, R.R., Archbold, N.W., George, A.D., Tye, S., Alexander, R., Foster, C.B., Barber, C.J., 2004. Unique marine Permian- Triassic boundary section from Western Australia. Australian Journal of Earth Sciences 51, 423-430, Origin Energy Ltd, 2011. Redback-2 W…				J1-	Redback 2 drill hole, Perth Basin	Australia	-	Kockatea Shale	Hovea	dark black mudstone
RB2-30	Perth Basin, Aus.	252	12.9989	1004.34	2409.08	265.133	10.057	1436.21	32.7601	129.784	252	20.4381	1.91517	39.1868	0.572269	0.023	0.133452	39.9207	893.043	822.276	864.812	0.569113	Samples straddle the Late Permian-Early Triassic boundary (fossil assemblages), Thomas, B.M., Willink, R.J., Grice, K., Twitchett, R.J., Purcell, R.R., Archbold, N.W., George, A.D., Tye, S., Alexander, R., Foster, C.B., Barber, C.J., 2004. Unique marine Permian- Triassic boundary section from Western Australia. Australian Journal of Earth Sciences 51, 423-430, Origin Energy Ltd, 2011. Redback-2 W…				J1-	Redback 2 drill hole, Perth Basin	Australia	-	Kockatea Shale	Hovea	dark black mudstone
RB2-30	Perth Basin, Aus.	252	2.63621	847.475	2820.73	185.164	10.7596	1526.61	37.2549	175.754	252	13.9003	3.13626	53.7912	0.1845	0.023	0.095656	35.1784	575.298	521.055	554.265	0.359111	Samples straddle the Late Permian-Early Triassic boundary (fossil assemblages), Thomas, B.M., Willink, R.J., Grice, K., Twitchett, R.J., Purcell, R.R., Archbold, N.W., George, A.D., Tye, S., Alexander, R., Foster, C.B., Barber, C.J., 2004. Unique marine Permian- Triassic boundary section from Western Australia. Australian Journal of Earth Sciences 51, 423-430, Origin Energy Ltd, 2011. Redback-2 W…				J1-	Redback 2 drill hole, Perth Basin	Australia	-	Kockatea Shale	Hovea	dark black mudstone
PF74-216	Phosphoria Fm. USA	270	2015.02	14.2004	366.239	369.022	1088.38	559.476	309.009	1004.37	270	38.2159	174.139	136.812	0.2485		0.0430341	84.0532	230.7	176.585	191.039	3.44351	Samples straddle the Late Permian-Early Triassic boundary (fossil assemblages), Thomas, B.M., Willink, R.J., Grice, K., Twitchett, R.J., Purcell, R.R., Archbold, N.W., George, A.D., Tye, S., Alexander, R., Foster, C.B., Barber, C.J., 2004. Unique marine Permian- Triassic boundary section from Western Australia. Australian Journal of Earth Sciences 51, 423-430, Origin Energy Ltd, 2011. Redback-2 W…				J1-	Redback 2 drill hole, Perth Basin	Australia	-	Kockatea Shale	Hovea	dark black mudstone
PF74-216	Phosphoria Fm. USA	270	782.456	29.6468	1482.33	479.836	793.089	112.625	331.649	1250.56	270	17.9472	39.3148	36.079	0.562567			41.0961	46.0378	40.6077	43.4437	0.593048	Samples straddle the Late Permian-Early Triassic boundary (fossil assemblages), Thomas, B.M., Willink, R.J., Grice, K., Twitchett, R.J., Purcell, R.R., Archbold, N.W., George, A.D., Tye, S., Alexander, R., Foster, C.B., Barber, C.J., 2004. Unique marine Permian- Triassic boundary section from Western Australia. Australian Journal of Earth Sciences 51, 423-430, Origin Energy Ltd, 2011. Redback-2 W…				J1-	Redback 2 drill hole, Perth Basin	Australia	-	Kockatea Shale	Hovea	dark black mudstone
PF74-216	Phosphoria Fm. USA	270	265.858	31.927	1097.09	214.442		108.321	532.446	1033.59	270	13.1717	46.6288	50.7282			0.036747	34.2764	48.32	41.9944	46.323	0.548322	Samples straddle the Late Permian-Early Triassic boundary (fossil assemblages), Thomas, B.M., Willink, R.J., Grice, K., Twitchett, R.J., Purcell, R.R., Archbold, N.W., George, A.D., Tye, S., Alexander, R., Foster, C.B., Barber, C.J., 2004. Unique marine Permian- Triassic boundary section from Western Australia. Australian Journal of Earth Sciences 51, 423-430, Origin Energy Ltd, 2011. Redback-2 W…				J1-	Redback 2 drill hole, Perth Basin	Australia	-	Kockatea Shale	Hovea	dark black mudstone
PF74-216	Phosphoria Fm. USA	270	2151.77	224.521	693.555	1064.76	1128.04	864.411	655.322	2150.52	270	98.4123	166.3	259.125	1.3563		0.0581174	206.662	437.676	359.976	364.39	8.99891	Samples straddle the Late Permian-Early Triassic boundary (fossil assemblages), Thomas, B.M., Willink, R.J., Grice, K., Twitchett, R.J., Purcell, R.R., Archbold, N.W., George, A.D., Tye, S., Alexander, R., Foster, C.B., Barber, C.J., 2004. Unique marine Permian- Triassic boundary section from Western Australia. Australian Journal of Earth Sciences 51, 423-430, Origin Energy Ltd, 2011. Redback-2 W…				J1-	Redback 2 drill hole, Perth Basin	Australia	-	Kockatea Shale	Hovea	dark black mudstone
PF74-216	Phosphoria Fm. USA	270	2264.72	179.392	430.004	539.134	799.12	658.192	686.897	288.851	270	74.1818	68.0499	200.57	0.935345		0.021	145.752	299.082	223.454	242.913	4.54673	Samples straddle the Late Permian-Early Triassic boundary (fossil assemblages), Thomas, B.M., Willink, R.J., Grice, K., Twitchett, R.J., Purcell, R.R., Archbold, N.W., George, A.D., Tye, S., Alexander, R., Foster, C.B., Barber, C.J., 2004. Unique marine Permian- Triassic boundary section from Western Australia. Australian Journal of Earth Sciences 51, 423-430, Origin Energy Ltd, 2011. Redback-2 W…				J1-	Redback 2 drill hole, Perth Basin	Australia	-	Kockatea Shale	Hovea	dark black mudstone
PF74-216	Phosphoria Fm. USA	270	2272.06	8.57124	611.112	709.323	509.704	997.858	778.84	310	270	146.679	102.09	343.331	2.43815		0.0396033	295.249	520.114	446.802	465.958	12.0879	Samples straddle the Late Permian-Early Triassic boundary (fossil assemblages), Thomas, B.M., Willink, R.J., Grice, K., Twitchett, R.J., Purcell, R.R., Archbold, N.W., George, A.D., Tye, S., Alexander, R., Foster, C.B., Barber, C.J., 2004. Unique marine Permian- Triassic boundary section from Western Australia. Australian Journal of Earth Sciences 51, 423-430, Origin Energy Ltd, 2011. Redback-2 W…				J1-	Redback 2 drill hole, Perth Basin	Australia	-	Kockatea Shale	Hovea	dark black mudstone
PF74-216	Phosphoria Fm. USA	270	409.378	49.5125	4137.77	738.945	166.381	238.974	997.65	1497.02	270	43.5666	76.3328	84.5901	1.05747			193.369	138.799	119.513	128.795	2.11311	Samples straddle the Late Permian-Early Triassic boundary (fossil assemblages), Thomas, B.M., Willink, R.J., Grice, K., Twitchett, R.J., Purcell, R.R., Archbold, N.W., George, A.D., Tye, S., Alexander, R., Foster, C.B., Barber, C.J., 2004. Unique marine Permian- Triassic boundary section from Western Australia. Australian Journal of Earth Sciences 51, 423-430, Origin Energy Ltd, 2011. Redback-2 W…				J1-	Redback 2 drill hole, Perth Basin	Australia	-	Kockatea Shale	Hovea	dark black mudstone
PF74-216	Phosphoria Fm. USA	270	334.356	47.4721	5664.25	1044.57	2460.36	215.204	1138.17	1251.16	270	42.0382	112.19	76.6366	1.56679		0.0475005	116.76	114.427	103.036	105.274	2.01045	Samples straddle the Late Permian-Early Triassic boundary (fossil assemblages), Thomas, B.M., Willink, R.J., Grice, K., Twitchett, R.J., Purcell, R.R., Archbold, N.W., George, A.D., Tye, S., Alexander, R., Foster, C.B., Barber, C.J., 2004. Unique marine Permian- Triassic boundary section from Western Australia. Australian Journal of Earth Sciences 51, 423-430, Origin Energy Ltd, 2011. Redback-2 W…				J1-	Redback 2 drill hole, Perth Basin	Australia	-	Kockatea Shale	Hovea	dark black mudstone
PF74-216	Phosphoria Fm. USA	270	195.83	64.1939	1494.78	772.232	247.113	162.951	1860.71	404.516	270	17.6258	28.3371	43.5954	0.463		0.0315	67.4404	85.1135	74.6465	77.4608	1.13944	Samples straddle the Late Permian-Early Triassic boundary (fossil assemblages), Thomas, B.M., Willink, R.J., Grice, K., Twitchett, R.J., Purcell, R.R., Archbold, N.W., George, A.D., Tye, S., Alexander, R., Foster, C.B., Barber, C.J., 2004. Unique marine Permian- Triassic boundary section from Western Australia. Australian Journal of Earth Sciences 51, 423-430, Origin Energy Ltd, 2011. Redback-2 W…				J1-	Redback 2 drill hole, Perth Basin	Australia	-	Kockatea Shale	Hovea	dark black mudstone
PF74-216	Phosphoria Fm. USA	270	194.862	37.7294	1805.91	603.143	636.568	190.677	2128.45	592.425	270	22.4205	29.1505	49.9725	0.361		0.0594944	56.9314	65.6613	56.0568	60.3433	1.28819	Samples straddle the Late Permian-Early Triassic boundary (fossil assemblages), Thomas, B.M., Willink, R.J., Grice, K., Twitchett, R.J., Purcell, R.R., Archbold, N.W., George, A.D., Tye, S., Alexander, R., Foster, C.B., Barber, C.J., 2004. Unique marine Permian- Triassic boundary section from Western Australia. Australian Journal of Earth Sciences 51, 423-430, Origin Energy Ltd, 2011. Redback-2 W…				J1-	Redback 2 drill hole, Perth Basin	Australia	-	Kockatea Shale	Hovea	dark black mudstone
PF74-216	Phosphoria Fm. USA	270	3513.06	30.7632	1866.58	1053.82	1164.33	1100.88	2397.49	1503.19	270	171.025	135.13	400.896	2.73411		0.0578838	339.167	593.684	520.765	548.056	12.4841	Samples straddle the Late Permian-Early Triassic boundary (fossil assemblages), Thomas, B.M., Willink, R.J., Grice, K., Twitchett, R.J., Purcell, R.R., Archbold, N.W., George, A.D., Tye, S., Alexander, R., Foster, C.B., Barber, C.J., 2004. Unique marine Permian- Triassic boundary section from Western Australia. Australian Journal of Earth Sciences 51, 423-430, Origin Energy Ltd, 2011. Redback-2 W…				J1-	Redback 2 drill hole, Perth Basin	Australia	-	Kockatea Shale	Hovea	dark black mudstone
PF74-216	Phosphoria Fm. USA	270	4439.63	6.6046	505.365	98.0589	5302.19	1299.43	2845.25	157.288	270	281.835	228.301	673.348	2.85519		0.018	254.433	345.795	294.546	309.666	3.06083	Samples straddle the Late Permian-Early Triassic boundary (fossil assemblages), Thomas, B.M., Willink, R.J., Grice, K., Twitchett, R.J., Purcell, R.R., Archbold, N.W., George, A.D., Tye, S., Alexander, R., Foster, C.B., Barber, C.J., 2004. Unique marine Permian- Triassic boundary section from Western Australia. Australian Journal of Earth Sciences 51, 423-430, Origin Energy Ltd, 2011. Redback-2 W…				J1-	Redback 2 drill hole, Perth Basin	Australia	-	Kockatea Shale	Hovea	dark black mudstone
PF74-216	Phosphoria Fm. USA	270	281.239	19.3994	839.537	432.04	1266.66	334.228	4086.34	1794.22	270	33.5121	110.374	108.762	2.52255		0.026	87.184	176.092	154.548	161.848	2.07115	Samples straddle the Late Permian-Early Triassic boundary (fossil assemblages), Thomas, B.M., Willink, R.J., Grice, K., Twitchett, R.J., Purcell, R.R., Archbold, N.W., George, A.D., Tye, S., Alexander, R., Foster, C.B., Barber, C.J., 2004. Unique marine Permian- Triassic boundary section from Western Australia. Australian Journal of Earth Sciences 51, 423-430, Origin Energy Ltd, 2011. Redback-2 W…				J1-	Redback 2 drill hole, Perth Basin	Australia	-	Kockatea Shale	Hovea	dark black mudstone
PF74-216	Phosphoria Fm. USA	270	174.837	15.4284	607.004	104.188	483.188	142.675	4435	1627.33	270	14.1736	70.0472	54.9865	1.84194		0.038	30.9931	168.58	160.215	156.641	1.10483	Samples straddle the Late Permian-Early Triassic boundary (fossil assemblages), Thomas, B.M., Willink, R.J., Grice, K., Twitchett, R.J., Purcell, R.R., Archbold, N.W., George, A.D., Tye, S., Alexander, R., Foster, C.B., Barber, C.J., 2004. Unique marine Permian- Triassic boundary section from Western Australia. Australian Journal of Earth Sciences 51, 423-430, Origin Energy Ltd, 2011. Redback-2 W…				J1-	Redback 2 drill hole, Perth Basin	Australia	-	Kockatea Shale	Hovea	dark black mudstone
TUN_263	Tasmania Basin, Aus.	274	596.29	72.5463	301.62	140.106	47.4575	326.362	9.281	122.158	274	3.25666	1.37905	9.06606	2.09821	0.116	0.043	5.26327	382.675	343.374	367.377	6.46224														0.79621
TUN_263	Tasmania Basin, Aus.	274	128.463	152.69	406.971	176.349	24.26	1581.01	10.467	28.956	274	6.78901	1.14623	6.74512	0.397	0.1315	0.0475	4.64109	346.648	304.369	325.844	6.89549														0.851962
TUN_263	Tasmania Basin, Aus.	274	565.107	70.4375	314.597	135.949	43.1723	317.896	10.6385	143.387	274	3.98908	2.7606	9.45835	2.35704	0.1285	0.0495	5.77422	352.172	316.867	329.554	5.42696														0.842258
TUN_263	Tasmania Basin, Aus.	274	119.847	178.48	379.976	165.59	49.6131	1167.62	11.8575	33.2557	274	3.98738	0.963146	9.00304	1.21213	0.145	0.055	3.79964	350.369	302.46	334.485	7.08563														0.852213
TUN_263	Tasmania Basin, Aus.	274	392.266	125.259	540.655	236.018	34.1651	489.963	11.8805	177.365	274	6.54142	1.10459	15.4645	2.08715	0.149	0.057	6.99474	554.309	484.792	518.141	8.97672														0.875933
TUN_263	Tasmania Basin, Aus.	274	323.716	131.362	294.157	115.972	8.22509	297.421	12.5285	24.0288	274	2.54412	0.620509	4.65153	0.4745	0.1495	0.057	4.09232	276.885	242.168	259.608	6.0822														0.790256
TUN_263	Tasmania Basin, Aus.	274	615.701	270.496	1031.18	430.179	64.2186	1319.17	15.683	142.365	274	10.9939	2.0968	20.5737	2.04324	0.1965	0.071	8.18434	770.797	674.608	718.019	18.7705														0.815186
TUN_263	Tasmania Basin, Aus.	274	82.666	166.907	339.78	159.146	23.1812	1544.08	18.2874	19.4229	274	5.06365	1.86789	6.65914	0.777977	0.1	0.038	3.96467	321.36	280.582	304.746	5.97442														0.815907
TUN_263	Tasmania Basin, Aus.	274	459.255	189.891	936.42	361.861	31.3619	596.816	26.7005	145.165	274	13.5304	3.16927	16.4099	1.11131	0.1525	0.0565	8.51387	641.466	562.615	601.055	8.75484														0.831669
TUN_263	Tasmania Basin, Aus.	274	364.759	198.946	863.766	302.2	48.674	918.175	29.0541	123.852	274	8.90726	2.28094	16.2188	1.50146	0.137958	0.0564915	11.4682	663.355	573.214	615.294	8.95588														0.85821
TUN_263	Tasmania Basin, Aus.	274	547.029	238.81	934.675	383.791	38.56	1220.78	33.4975	122.637	274	10.9314	1.80263	18.1296	1.75076	0.172	0.0605	8.41363	754.542	660.253	704.335	17.6575														0.809394
TUN_263	Tasmania Basin, Aus.	274	199.909	335.494	2274.97	631.705	164.335	1007.98	87.5502	297.375	274	20.3454	5.9352	32.8801	1.93918	0.075	0.0898977	59.2383	1481.35	1336.71	1438.62	5.01876														0.854977
TUN_263	Tasmania Basin, Aus.	274	346.861	454.984	2610.19	689.738	55.5383	1149	100.278	230.112	274	18.9147	4.52536	45.5848	1.76906	0.14	0.053	18.7382	1727.68	1369.77	1481.74	10.3652														0.839283
TUN_296	Tasmania Basin, Aus.	278	4325.73	172.725	716.53	357.189	250.329	273.211	12.3065	29.814	278	3.24371	2.65752	11.3251	1.19143	0.153	0.0775	17.5937	353.27	306.902	329.333	9.0399														0.712817
TUN_296	Tasmania Basin, Aus.	278	505.666	15.9138	132.349	105.439	39.5477	42.2443	12.4525	3.91444	278	1.97158	0.1985	2.31149	0.313	0.1525	0.079	2.71973	56.4189	56.534	51.1979	1.7833														0.804656
TUN_296	Tasmania Basin, Aus.	278	5424.75	88.1776	508.044	126.737	202.072	356.827	24.4325	26.6654	278	4.50927	1.06083	11.8857	2.3681	0.085	0.042	26.0773	115.823	102.213	109.829	1.17108														0.822595
TUN_296	Tasmania Basin, Aus.	278	5033.15	181.892	599.382	402.415	203.1	2245.34	26.2564	17.5447	278	4.12738	0.464519	9.18368	4.79899	0.153	0.078	26.5918	268.221	240.883	257.088	8.09661														0.767034
TUN_296	Tasmania Basin, Aus.	278	4894.43	122.497	546.837	305.092	209.192	838.935	26.8868	22.6209	278	4.69978	1.0885	11.2979	2.39619	0.13535	0.0732327	20.6762	252.328	227.724	238.446	8.00352
TUN_296	Tasmania Basin, Aus.	278	5862.17	100.393	587.098	446.097	266.122	345.995	28.2414	28.3082	278	6.42607	0.1545	13.8543	2.3041	0.121	0.057	31.9112	305.308	277.473	295.223	12.7482														0.799409
TUN_296	Tasmania Basin, Aus.	278	8442.87	84.7213	533.872	203.824	279.136	535.927	29.5346	23.7463	278	3.66266	2.60131	19.5044	4.90414	0.075	0.0918271	31.8803	139.99	127.886	137.018	1.41812														0.822595
TUN_296	Tasmania Basin, Aus.	278	4566.31	74.4616	311.295	87.1676	146.553	211.62	30.2419	22.4198	278	2.01397	0.773575	8.03026	2.61346	0.083	0.04	7.53854	99.7978	94.3842	98.327	1.75989														0.876655
TUN_296	Tasmania Basin, Aus.	278	6668.29	183.837	656.636	455.828	295.515	2248.16	31.9471	24.9336	278	5.85623	0.2535	11.3887	2.94103	0.1965	0.099	25.9813	340.332	309.962	319.633	15.7107														0.79454
TUN_296	Tasmania Basin, Aus.	278	4406.49	139.511	679.219	389.299	212.703	1022.71	34.736	24.6429	278	6.90564	1.53282	10.9472	1.73686	0.1475	0.0735	21.9949	439.141	393.14	403.954	15.3707														0.818224
TUN_296	Tasmania Basin, Aus.	278	3708.81	183.34	743.942	476.92	196.842	1107.31	38.7191	24.2195	278	8.28131	1.18788	14.5481	0.790798	0.187	0.0945	14.4737	404.982	367.859	382.861	12.9367														0.809186
TUN_327	Tasmania Basin, Aus.	282	303.085	19.2818	136.496	128.431	135.107	3308.23	18.441	10.764	282	2.95922	0.206	1.862	0.479	0.081	0.0435	2.51825	46.8648	42.5529	44.251	1.52573
TUN_327	Tasmania Basin, Aus.	282	2322.59	93.3696	699.451	265.757	228.728	301.175	24.167	23.0355	282	8.00265	1.31793	12.0243	3.38284	0.098	0.0535	11.0111	173.075	157.776	170.392	2.7719
TUN_327	Tasmania Basin, Aus.	282	2257.97	144.103	933.626	436.8	197.932	1787	50.6577	30.3868	282	11.8801	1.72983	12.641	2.68978	0.0875	0.0455	18.4681	316.498	280.275	293.623	7.27061
TUN_327	Tasmania Basin, Aus.	282	1153.38	81.1651	608.324	212.672	159.111	2106.72	66.7885	28.0308	282	7.08107	0.764257	7.91525	3.86492	0.0505	0.028	5.76865	183.403	161.26	164.15	3.79928
TUN_327	Tasmania Basin, Aus.	282	3755.5	347.301	926.831	598.964	478.785	2802.94	93.3863	32.9768	282	12.3266	6.83735	20.0997	12.2858	0.1235	0.0665	17.8672	370.94	337.377	370.32	11.2847
TUN_327	Tasmania Basin, Aus.	282	4152.89	145.823	991.38	441.164	380.742	1022.84	94.7187	45.0556	282	12.648	3.09745	20.163	5.99978	0.0635	0.034	23.1082	357.824	321.631	346.899	10.5706
TUN_327	Tasmania Basin, Aus.	282	3090.98	185.083	943.798	356.181	298.673	2163.15	95.0608	40.6476	282	9.8732	2.70972	17.4683	8.93679	0.0693	0.0469157	18.3653	268.24	241.272	255.685	5.54037
TUN_327	Tasmania Basin, Aus.	282	3748.09	389.433	1352.88	692.971	377.494	3329.72	120.21	50.5503	282	19.1451	3.32554	23.6941	10.5099	0.05	0.027	24.7721	381.44	343.115	360.357	8.66096
TUN_327	Tasmania Basin, Aus.	282	6045.51	218.198	1021.58	495.983	464.232	3037.03	124.023	53.6384	282	9.94649	4.60652	26.7798	10.3229	0.069	0.036	25.8616	401.841	366.202	377.533	7.60968
TUN_327	Tasmania Basin, Aus.	282	2802.33	205.713	1341.51	120.418	272.477	1891.36	164.883	63.8223	282	7.10016	2.94347	24.4358	19.6213	0.035	0.0795446	19.0501	239.568	213.045	230.223	0.958326
TUN_327	Tasmania Basin, Aus.	282	4368.42	206.44	1425.9	168.648	292.12	2044.51	193.333	68.216	282	7.64268	2.26883	25.0685	20.2116	0.035	0.0556127	35.2272	210.95	189.483	199.105	0.951826
TUN_363	Tasmania Basin, Aus.	284	77.6866	84.3641	209.716	115.273	27.6949	655.642	4.5545	21.9303	284	2.47179	0.533202	13.0161	2.26737	0.0559965	0.018	10.3874	251.34	222.241	227.049	1.54494
TUN_363	Tasmania Basin, Aus.	284	80.8471	66.7941	195.358	108.119	24.3958	644.525	4.648	26.0171	284	2.46425	0.992526	11.4688	2.40924	0.023	0.018	9.19952	250.574	238.667	249.335	2.11903
TUN_363	Tasmania Basin, Aus.	284	105.253	70.0073	206.901	355.197	64.3687	682.364	4.9065	26.5869	284	2.72198	0.532401	21.3276	3.10271	0.0738303	0.019	15.4383	564.041	493.545	503.239	2.40942
TUN_363	Tasmania Basin, Aus.	284	94.7805	61.5729	187.481	205.043	53.0882	630.806	8.9631	22.1456	284	1.87692	0.628983	14.4656	2.25087	0.0195	0.0155	10.3795	311.776	277.351	297.185	1.88385
TUN_363	Tasmania Basin, Aus.	284	78.7105	62.54	155.07	217.537	26.4673	610.731	10.1761	23.4142	284	1.84688	0.710675	17.6088	2.12473	0.0494476	0.0155	8.96521	210.451	188.875	205.813	1.02332
TUN_363	Tasmania Basin, Aus.	284	51.6838	106.574	184.481	125.012	36.7866	820.072	10.408	27.1448	284	2.34675	0.810533	9.02347	3.47895	0.055	0.0415	8.6872	230.021	211.534	221.433	2.40408
TUN_363	Tasmania Basin, Aus.	284	110.298	69.4857	160.595	251.2	40.1272	1080.09	13.5365	24.2955	284	1.78053	2.25281	7.99837	4.90759	0.0685	0.053	9.22558	288.482	251.954	269.757	4.0727
TUN_363	Tasmania Basin, Aus.	284	107.151	90.8018	267.986	215.307	61.8963	1225.28	13.555	23.1507	284	2.08636	2.07118	16.241	5.24315	0.0695	0.052	12.2981	453.033	357.429	377.849	3.93993
TUN_363	Tasmania Basin, Aus.	284	67.8744	60.9186	177.925	196.328	27.0748	714.194	14.8242	26.6579	284	1.83166	1.30158	8.65785	2.73881	0.035	0.0275	13.1753	215.231	193.231	204.434	2.21905
TUN_363	Tasmania Basin, Aus.	284	95.1783	102.793	255.833	216.075	39.7833	912.128	15.6768	30.0755	284	2.58889	1.29048	21.9528	3.64686	0.0512774	0.0358562	11.7453	363.991	323.939	338.392	2.47685
TUN_363	Tasmania Basin, Aus.	284	177.498	354.876	812.822	371.738	35.9335	2057.57	71.1965	79.4119	284	6.46177	3.0709	99.7204	7.94518	0.063	0.098562	19.6966	864.959	804.566	827.83	3.15221
GV1	Sese Coalfield, Botswana	285	10.2151	28.2724	28.4402	0.1956	2.48117	159.606	3.78071	10.194	285	0.0055	0.0452442	0.469041	0.373912	0.003	0.0025	4.64662	4.97515	4.42274	4.68658	0.0177051
GV1	Sese Coalfield, Botswana	285	7.47853	41.8326	74.1122	0.20011	1.76142	237.696	4.56273	10.3278	285	0.0055	0.172705	1.46014	0.3357	0.003	0.0025	10.4596	9.6221	8.6081	9.29815	0.0129583	Samples straddle the Late Permian-Early Triassic boundary (fossil assemblages), Thomas, B.M., Willink, R.J., Grice, K., Twitchett, R.J., Purcell, R.R., Archbold, N.W., George, A.D., Tye, S., Alexander, R., Foster, C.B., Barber, C.J., 2004. Unique marine Permian- Triassic boundary section from Western Australia. Australian Journal of Earth Sciences 51, 423-430, Origin Energy Ltd, 2011. Redback-2 W…				J1-	Redback 2 drill hole, Perth Basin	Australia	-	Kockatea Shale	Hovea	dark black mudstone
GV1	Sese Coalfield, Botswana	285	9.02916	71.544	23.3186	0.500488	1.6125	159.599	5.21421	11.627	285	0.0160627	0.0880856	0.611451	0.423939	0.003	0.0025	5.51885	6.14497	5.95346	6.05713	0.0266639	Samples straddle the Late Permian-Early Triassic boundary (fossil assemblages), Thomas, B.M., Willink, R.J., Grice, K., Twitchett, R.J., Purcell, R.R., Archbold, N.W., George, A.D., Tye, S., Alexander, R., Foster, C.B., Barber, C.J., 2004. Unique marine Permian- Triassic boundary section from Western Australia. Australian Journal of Earth Sciences 51, 423-430, Origin Energy Ltd, 2011. Redback-2 W…				J1-	Redback 2 drill hole, Perth Basin	Australia	-	Kockatea Shale	Hovea	dark black mudstone
GV1	Sese Coalfield, Botswana	285	6.3868	44.8595	184.443	0.453832	2.55549	382.421	6.3211	13.7177	285	0.0055	0.238344	2.81829	0.359983	0.00734189	0.0025	14.0147	18.1692	16.1738	17.3407	0.0170077	K-Ar ages of illite clays of the Meade Peak Member of the Phosphoria Formation, Western Phosphate Field, southeastern Idaho 2007, Elliott, W. Crawford; Ritter, Kristen ; Wampler, J. ; Grauch, Richard I.; Bauluz, Blanca Abstracts with Programs, 39: 630 - 630. McKelvey et al., 1953 Stratigraphic sections of the phosphoria formation, 1947-1948, part I.			A	G5-	Idaho	USA		Phosphoria	Meade Peak	phosphorite shale
GV1	Sese Coalfield, Botswana	285	18.0375	86.0257	137.206	0.269	3.64109	152.693	14.6769	17.6937	285	0.023	0.602674	5.71997	0.499986	0.0125	0.009	2.6857	11.567	10.2232	9.76062	0.009	K-Ar ages of illite clays of the Meade Peak Member of the Phosphoria Formation, Western Phosphate Field, southeastern Idaho 2007, Elliott, W. Crawford; Ritter, Kristen ; Wampler, J. ; Grauch, Richard I.; Bauluz, Blanca Abstracts with Programs, 39: 630 - 630. McKelvey et al., 1953 Stratigraphic sections of the phosphoria formation, 1947-1948, part I.			A	G5-	Idaho	USA		Phosphoria	Meade Peak	phosphorite shale
GV1	Sese Coalfield, Botswana	285	37.5932	520.195	587.841	3.0917	9.27684	247.883	29.5702	39.1861	285	0.0520792	2.84166	24.6322	0.49707	0.0125	0.009	5.57488	59.7724	53.7564	59.1549	0.009	K-Ar ages of illite clays of the Meade Peak Member of the Phosphoria Formation, Western Phosphate Field, southeastern Idaho 2007, Elliott, W. Crawford; Ritter, Kristen ; Wampler, J. ; Grauch, Richard I.; Bauluz, Blanca Abstracts with Programs, 39: 630 - 630. McKelvey et al., 1953 Stratigraphic sections of the phosphoria formation, 1947-1948, part I.			A	G5-	Idaho	USA		Phosphoria	Meade Peak	phosphorite shale
GV1	Sese Coalfield, Botswana	285	24.3192	517.553	769.25	2.83194	9.13397	300.079	32.1162	38.917	285	0.023	1.99895	24.5137	0.440613	0.0125	0.009	9.11277	12.5142	9.19809	10.3858	0.0532329	K-Ar ages of illite clays of the Meade Peak Member of the Phosphoria Formation, Western Phosphate Field, southeastern Idaho 2007, Elliott, W. Crawford; Ritter, Kristen ; Wampler, J. ; Grauch, Richard I.; Bauluz, Blanca Abstracts with Programs, 39: 630 - 630. McKelvey et al., 1953 Stratigraphic sections of the phosphoria formation, 1947-1948, part I.			A	G5-	Idaho	USA		Phosphoria	Meade Peak	phosphorite shale
GV1	Sese Coalfield, Botswana	285	17.6011	873.955	1374.23	4.61939	13.9478	575.906	61.4554	53.7112	285	0.023	3.55438	29.881	0.175	0.0125	0.009	11.0446	93.6241	84.6971	88.0363	0.041601	K-Ar ages of illite clays of the Meade Peak Member of the Phosphoria Formation, Western Phosphate Field, southeastern Idaho 2007, Elliott, W. Crawford; Ritter, Kristen ; Wampler, J. ; Grauch, Richard I.; Bauluz, Blanca Abstracts with Programs, 39: 630 - 630. McKelvey et al., 1953 Stratigraphic sections of the phosphoria formation, 1947-1948, part I.			A	G5-	Idaho	USA		Phosphoria	Meade Peak	phosphorite shale
GV1	Sese Coalfield, Botswana	285	24.4563	980.171	1302.36	3.5751	21.0357	609.408	66.2262	78.4627	285	0.023	4.23278	35.7736	0.1745	0.0413911	0.009	12.0332	91.0427	80.2278	83.5467	0.0258037	K-Ar ages of illite clays of the Meade Peak Member of the Phosphoria Formation, Western Phosphate Field, southeastern Idaho 2007, Elliott, W. Crawford; Ritter, Kristen ; Wampler, J. ; Grauch, Richard I.; Bauluz, Blanca Abstracts with Programs, 39: 630 - 630. McKelvey et al., 1953 Stratigraphic sections of the phosphoria formation, 1947-1948, part I.			A	G5-	Idaho	USA		Phosphoria	Meade Peak	phosphorite shale
GV1	Sese Coalfield, Botswana	285	24.7253	1087.73	1270.66	3.63023	23.7709	619.809	68.7541	86.1151	285	0.025438	5.50977	43.3012	0.7676	0.0462225	0.0025	12.5059	73.4313	55.2762	60.6518	0.0357931	K-Ar ages of illite clays of the Meade Peak Member of the Phosphoria Formation, Western Phosphate Field, southeastern Idaho 2007, Elliott, W. Crawford; Ritter, Kristen ; Wampler, J. ; Grauch, Richard I.; Bauluz, Blanca Abstracts with Programs, 39: 630 - 630. McKelvey et al., 1953 Stratigraphic sections of the phosphoria formation, 1947-1948, part I.			A	G5-	Idaho	USA		Phosphoria	Meade Peak	phosphorite shale
TUN_418.4	Tasmania Basin, Aus.	288	5519.26	113.345	399.798	822.572	281.728	324.078	44.8593	108.142	288	5.59635	1.20081	23.3532	2.05449	0.0677189	0.123675	16.8226	494.334	453.591	484.307	7.62053
TUN_418.4	Tasmania Basin, Aus.	288	5575.95	168.797	441.575	744.325	243.14	362.124	70.8457	110.7	288	5.92512	1.16565	30.6867	3.045	0.0335	0.145675	29.0278	480.6	420.928	436.502	8.97208
TUN_418.4	Tasmania Basin, Aus.	288	6876.16	90.6707	413.808	648.752	321.72	395.5	73.1766	112.616	288	5.78978	1.32493	37.1673	0.6475	0.052	0.048	20.2263	434.023	400.299	448.01	7.59086
TUN_418.4	Tasmania Basin, Aus.	288	5660.33	71.268	442.474	784.208	290.448	397.358	76.8325	136.216	288	7.22863	0.648365	31.5275	2.37751	0.0235	0.0756162	21.4344	620.626	565.812	597.216	7.20184
TUN_418.4	Tasmania Basin, Aus.	288	6888.5	55.0866	329.545	629.341	219.861	507.491	79.162	317.224	288	6.07716	2.52009	33.9925	1.61706	0.054	0.048	29.0845	328.643	323.704	342.739	4.94395
TUN_418.4	Tasmania Basin, Aus.	288	5604.07	133.808	407.692	668.284	363.906	525.941	83.8612	165.12	288	5.96464	1.35779	33.0709	2.44764	0.0661674	0.103066	24.2493	433.299	399.619	423.685	6.07998
TUN_418.4	Tasmania Basin, Aus.	288	2418.49	84.4432	331.731	458.884	1692.45	302.876	87.0832	80.2192	288	5.36729	0.094	19.8252	0.6065	0.26835	0.161535	14.635	344.107	324.164	341.71	6.7282
TUN_418.4	Tasmania Basin, Aus.	288	7808.68	39.7382	437.345	755.365	260.127	630.715	87.3868	228.25	288	5.80612	1.48969	39.1308	3.38783	0.0245	0.102514	33.448	337.658	335.495	325.853	3.83163
TUN_418.4	Tasmania Basin, Aus.	288	7194.25	59.7928	406.311	743.938	219.477	496.857	90.9106	165.849	288	6.23497	1.31352	37.8168	3.52484	0.030025	0.127892	30.5326	437.362	398.395	430.127	4.96902
TUN_418.4	Tasmania Basin, Aus.	288	6514.28	38.5477	369.42	759.603	185.069	533.621	100.159	300.291	288	6.72723	1.33279	33.9799	3.14883	0.0285	0.114158	34.6789	312.196	280.959	307.993	4.18207
TUN_418.4	Tasmania Basin, Aus.	288	6579.11	67.5468	432.562	739.043	223.732	550.811	105.479	161.202	288	8.68467	1.69456	40.5159	5.89852	0.0957481	0.141663	30.2686	438.141	400.826	420.77	7.59452
TUN_418.4	Tasmania Basin, Aus.	288	609.772	682.648	480.039	265.092	65.2168	1283.92	106.579	95.6098	288	2.17369	2.15131	35.7845	0.616	0.05	0.045	6.58388	538.602	491.638	525.305	3.24503
TUN_554.3	Tasmania Basin, Aus.	291	1868.3	162.429	855.141	1077.38	1259.86	1058.64	75.1222	48.0719	291	26.1884	5.52626	47.7631	4.77026	0.2575	1.15177	6.03318	1947.16	1766.46	1841.62	91.5888
TUN_554.3	Tasmania Basin, Aus.	291	1942.94	161.462	859.392	1069.74	1262.7	1050.31	75.9096	46.4076	291	25.8905	5.52119	47.3113	4.75016	0.3025	1.12402	5.71199	1935.99	1756.98	1830.55	91.1732
TUN_554.3	Tasmania Basin, Aus.	291	1852.68	163.072	873.286	1091.42	1235.3	1068.6	75.9124	48.6512	291	26.4763	5.57375	48.1269	4.24737	0.2415	1.16464	5.51075	1963.43	1781.96	1858.52	92.3782
TUN_554.3	Tasmania Basin, Aus.	291	1876.3	162.253	870.843	1087.12	1256.39	1066.05	76.7911	48.8008	291	26.4289	5.56876	47.9549	4.78445	0.2455	1.15524	5.76049	1959.71	1778.82	1853.49	92.1451
TUN_554.3	Tasmania Basin, Aus.	291	1952.83	163.308	868.955	1076.86	1259.79	1054.74	81.4538	47.9949	291	26.0759	5.58264	47.3304	4.91046	0.3645	1.16552	5.71742	1933.55	1754.63	1828.34	91.0009
TUN_554.3	Tasmania Basin, Aus.	291	1904.68	180.461	906.775	1098.54	1153.3	1644.43	83.5804	52.726	291	25.3149	5.38859	49.7433	4.21335	0.287571	1.09368	7.03038	1911.49	1741.2	1809.51	86.0892
TUN_554.3	Tasmania Basin, Aus.	291	1985.44	243.286	1062.31	1005.11	843.572	4314.35	98.9166	64.2951	291	22.8321	5.95019	56.8801	3.00456	0.2985	1.11774	12.4912	1805.26	1633.46	1689.28	68.4703
TUN_554.3	Tasmania Basin, Aus.	291	1854.3	207.417	957.496	1282.12	955.475	1898.3	100.957	64.8605	291	23.3123	3.99733	52.8367	3.02621	0.303	0.776825	7.98757	1835.33	1716.11	1764.79	75.8679
TUN_608	Tasmania Basin, Aus.	292	25.4849	100.234	184.686	65.1428	37.4683	402.992	12.636	6.51995	292	0.82634	0.147285	11.2523	0.3915	0.1255	0.0485	4.80804	357.04	333.662	351.758	21.4926
TUN_608	Tasmania Basin, Aus.	292	1745.16	81.9585	445.234	341.744	788.283	3061.76	15.1465	6.46868	292	3.03141	5.0768	49.7827	3.68269	0.1455	0.059	2.59203	1352.75	1270.27	1299.76	6.41743
TUN_608	Tasmania Basin, Aus.	292	332.062	698.12	954.99	798.482	2571.45	4528.37	101.119	42.6556	292	4.23939	3.40445	91.6001	9.04979	0.1275	0.146004	4.06907	2371.53	2143.57	2274.66	20.3325
TUN_608	Tasmania Basin, Aus.	292	43.3048	784.14	1181.1	783.631	493.645	2171.7	169.333	42.5173	292	2.04315	0.076	136.597	5.92691	0.1285	0.051	3.77001	3048.73	2755.68	2924.67	10.0475
TUN_628.2	Tasmania Basin, Aus.	292	264.694	111.22	220.339	214.414	1.723	233.636	13.1365	11.4904	292	1.58215	0.303791	7.03309	0.6095	0.0565	0.0455	1.47635	366.773	320.072	343.806	20.4994
TUN_628.2	Tasmania Basin, Aus.	292	8.51393	106.658	153.43	191.702	n.d.	217.726	23.8727	25.0342	292	2.41616	0.813773	9.52438	1.07345	0.111944	0.0315	0.760128	395.184	358.944	393.907	17.0276
TUN_628.2	Tasmania Basin, Aus.	292	419.681	171.958	206.26	239.21	6.64197	293.717	25.7519	5.50236	292	1.18448	0.0793493	7.61032	0.833707	0.018	0.054855	0.410399	341.319	309.147	326.616	9.86677
TUN_628.2	Tasmania Basin, Aus.	292	106.368	201.889	511.414	330.708	27.2022	561.445	32.4165	6.06834	292	0.767763	0.874508	27.1532	0.5995	0.054	0.0445	2.79857	666.231	628.031	650.883	25.4508
TUN_628.2	Tasmania Basin, Aus.	292	1119.21	163.061	304.022	269.168	22.3139	665.45	37.5673	5.05177	292	2.40566	0.145351	13.1052	1.01196	0.133537	0.022	0.711695	588.074	556.647	556.397	11.4512
TUN_628.2	Tasmania Basin, Aus.	292	1123.05	170.384	227.207	228.712	14.9494	339.909	38.2298	2.62175	292	1.11854	0.0778768	9.94667	0.560097	0.0165	0.0638608	1.00663	377.289	360.176	364.995	5.83268
TUN_628.2	Tasmania Basin, Aus.	292	1041.94	317.089	497.2	348.539	12.3808	632.93	67.077	15.275	292	1.63815	0.429867	23.5768	1.39276	0.0677867	0.049451	2.985	1062.61	976.571	1022.1	22.8229
TUN_628.2	Tasmania Basin, Aus.	292	n.d.	426.55	692.328	375.701	1.4545	410.252	70.6482	21.9761	292	1.75045	1.22871	31.9552	1.16825	0.119385	0.038	4.41447	1416.04	1273.35	1350.53	28.107
TUN_628.2	Tasmania Basin, Aus.	292	1347.73	343.938	614.559	506.079	828.856	3094.71	77.3383	21.8969	292	3.15849	1.95199	64.9983	5.98203	0.1132	0.11029	3.59067	1700.58	1549.58	1627.01	21.0117
TUN_628.2	Tasmania Basin, Aus.	292	4592.62	55.2387	306.789	541.397	253.437	5308.75	88.4576	11.3228	292	5.65215	1.05542	35.7594	10.8592	0.039	0.246944	2.7142	1372.87	1244.71	1284.23	46.7684
TUN_628.2	Tasmania Basin, Aus.	292	3598.52	376.928	601.791	376.214	n.d.	778.18	92.7516	18.1906	292	1.18213	0.484232	24.7495	0.962934	0.022	0.0165	3.67364	1222.22	1122.37	1171.24	19.1119
TUN_628.2	Tasmania Basin, Aus.	292	970.373	406.427	526.675	369.291	n.d.	917.343	106.071	16.3475	292	1.07826	0.0845	28.5892	3.18171	0.164068	0.121135	2.25903	1450.78	1317.21	1382.54	23.4481
TUN_628.2	Tasmania Basin, Aus.	292	2193.99	427.568	625.5	390.701	n.d.	965.089	110.446	16.9303	292	2.06206	0.118902	26.0134	1.767	0.0575062	0.0155	3.34076	1242.91	1130.35	1182.57	19.9133
TUN_628.2	Tasmania Basin, Aus.	292	n.d.	594.074	908.944	508.281	n.d.	599.314	117.085	22.1682	292	0.654171	0.058	44.4802	1.09741	0.035	0.027	6.729	2152.97	1983.68	2081.94	60.7993
TUN_628.2	Tasmania Basin, Aus.	292	614.959	648.353	988.484	688.366	n.d.	1613.1	136.948	31.918	292	3.45592	0.889413	52.7614	3.84765	0.025	0.113062	8.23934	2531.52	2358.88	2459.74	32.3671
TUN_642.1	Tasmania Basin, Aus.	292.5	7478.94	83.179	221.17	292.281	113.365	1069.11	10.867	41.3555	292.5	2.40206	0.636462	12.81	0.598078	0.0665	0.042	12.7181	463.941	420.15	441.097	8.62667
TUN_642.1	Tasmania Basin, Aus.	292.5	865.489	31.8582	139.626	65.4874	10.9632	178.499	13.7295	13.0381	292.5	0.72654	0.159	4.73607	0.3025	0.089	0.0555	5.96698	235.768	212.993	225.559	4.77539
TUN_642.1	Tasmania Basin, Aus.	292.5	1649.48	173.002	512.019	150.679	8.26301	861.08	18.029	33.5358	292.5	1.75465	0.199	10.1987	0.378	0.115	0.071	13.7801	533.409	482.905	510.237	10.2476
TUN_642.1	Tasmania Basin, Aus.	292.5	2078.28	118.992	479.015	176.139	37.0135	797.73	19.342	40.3312	292.5	1.99072	0.444782	11.8201	0.404	0.1215	0.0755	15.9889	612.844	554.203	584.093	11.6154
TUN_642.1	Tasmania Basin, Aus.	292.5	9591.84	52.8795	260.047	325.876	101.311	1515.01	24.5036	35.5179	292.5	1.49688	0.61343	15.702	2.66848	0.074	0.047	14.7623	358.305	359.695	340.841	7.58753
TUN_642.1	Tasmania Basin, Aus.	292.5	7389.35	83.1996	221.697	276.382	96.5079	3046.05	28.6517	66.6967	292.5	1.13686	1.2998	15.6779	2.43888	0.055	0.035	10.2325	386.713	343.346	374.969	6.82904
TUN_642.1	Tasmania Basin, Aus.	292.5	6620.07	74.0334	254.088	274.832	79.9666	2139.58	31.2589	54.8589	292.5	1.79785	0.312576	17.3776	2.06208	0.0565	0.036	12.5059	423.729	398.426	414.844	7.2065
TUN_642.1	Tasmania Basin, Aus.	292.5	6649.3	99.2554	319.786	296.892	76.7542	1686.96	33.7369	55.1859	292.5	1.98636	0.99414	18.8871	2.134	0.077625	0.0500402	15.9866	522.884	467.606	493.118	7.1157
TUN_642.1	Tasmania Basin, Aus.	292.5	6360.07	84.2995	289.086	337.819	81.3166	2629.91	35.7737	74.3237	292.5	1.62126	1.84721	17.5985	2.84926	0.073	0.0455	12.8539	452.149	413.723	427.439	7.69853
TUN_642.1	Tasmania Basin, Aus.	292.5	6109.54	80.1516	247.511	322.488	171.864	3756.12	41.2241	61.5958	292.5	1.44063	2.65209	18.0634	4.41261	0.0775	0.0495	13.597	428.954	380.73	400.402	7.97754
TUN_642.1	Tasmania Basin, Aus.	292.5	12919	94.7186	258.964	497.207	74.3426	2314.57	49.7315	65.1926	292.5	2.2096	1.28197	34.1674	3.37876	0.0215	0.0284823	19.2574	423.686	362.034	397.226	2.16045
TUN_642.1	Tasmania Basin, Aus.	292.5	7061.52	177.307	537.918	411.792	76.2338	550.503	64.1329	91.1562	292.5	4.30678	1.71397	33.0154	0.560962	0.037	0.023	33.5108	1108.76	916.2	962.027	4.20488
TUN_642.1	Tasmania Basin, Aus.	292.5	11668.1	137.445	416.285	431.721	69.9041	1385.36	67.5993	84.6286	292.5	2.95244	0.769385	35.4783	5.55439	0.145	0.092	26.6657	846.347	766.86	838.681	6.45879
	Tasmania Basin, Aus.	293	722.002	832.211	2158.4	549.293	10.7675	2002.15	24.7441	208.282	293	24.8493	0.650663	78.6475	5.5069	0.052	0.515062	72.8905	917.845	788.298	836.092	92.4422
TUN_696.4	Tasmania Basin, Aus.	293	221.605	552.233	339.03	160.573	15.9781	677.969	6.5395	35.2789	293	3.45785	0.1015	35.0197	1.24921	0.0835	0.0932411	2.17235	479.845	445.36	472.273	16.5994
TUN_696.4	Tasmania Basin, Aus.	293	102.203	649.227	490.624	175.984	18.5507	1442.93	7.542	162.596	293	3.07539	0.1165	57.7916	5.00806	0.0965	0.048	6.27991	470.167	429.87	476.486	31.5826
TUN_696.4	Tasmania Basin, Aus.	293	419.893	637.244	359.226	178.535	14.4311	1515.99	8.865	70.7257	293	3.29431	0.480921	43.3523	2.55218	0.1125	0.058	2.31739	527.707	463.919	485.49	22.5044
TUN_696.4	Tasmania Basin, Aus.	293	2319.9	477.789	256.339	110.445	33.5259	1737.79	11.727	67.1761	293	2.84314	0.179	23.7146	3.38485	0.148	0.0755	2.62748	317.009	292.443	304.465	9.19254
TUN_696.4	Tasmania Basin, Aus.	293	1281.45	540.67	253.711	160.295	3822.55	1635.79	12.022	38.1833	293	3.46374	3.81215	25.6421	1.11816	0.153	0.078	0.903129	412.368	385.111	393.384	7.49505
TUN_696.4	Tasmania Basin, Aus.	293	n.d.	585.739	386.45	123.269	1.7595	1369.5	13.545	176.106	293	4.6673	0.207	26.7081	1.29664	0.1715	0.087	4.90025	484.447	476.405	378.46	14.6442
TUN_696.4	Tasmania Basin, Aus.	293	n.d.	n.d.	n.d.	331267	n.d.	61.4437	25.3075	n.d.	293	0.915039	1.37514	9.36148	0.621	0.318	0.161	n.d.	n.d.	n.d.	n.d.	16.7967
TUN_696.4	Tasmania Basin, Aus.	293	5718.96	1196.01	1260.22	30473.8	641.896	1261.45	38.1953	219.729	293	6.60853	0.707316	69.2781	9.13188	0.147544	0.115565	27.4757	770.449	710.625	726.639	22.3658
TUN_696.4	Tasmania Basin, Aus.	293	n.d.	743.62	447.401	218.806	n.d.	699.176	44.8684	86.7758	293	2.06764	0.523103	63.8605	3.5287	0.1405	0.0715	3.53167	583.467	567.611	579.77	29.2575
TUN_696.4	Tasmania Basin, Aus.	293	4921.09	1346.45	612.643	350.607	n.d.	2430.68	50.5266	307.808	293	2.25497	0.0835	111.169	13.9127	0.225212	0.036	4.27607	693.291	623.82	664.398	94.8161
TUN_696.4	Tasmania Basin, Aus.	293	17477	2853.87	4677.67	1298.32	560.536	917.86	115.276	611.253	293	21.7141	0.456842	116.752	30.2655	0.0425	0.282025	130.56	1811.03	1662.39	1700.01	1.92895
TUN_696.4	Tasmania Basin, Aus.	293	19008.6	3573.24	4779.13	1167.91	667.833	1386.83	123.929	641.39	293	24.9404	0.444825	248.687	37.5136	0.131777	0.28095	117.189	1925.16	1759.32	1811.66	1.20641
TUN_746	Tasmania Basin, Aus.	293	1.9905	146.965	332.865	76.0793	10.1849	9993.25	7.2885	15.1733	293	7.49542	0.0885	365.927	0.205	0.036	0.159983	22.3204	210.447	191.804	202.41	0.990003
TUN_746	Tasmania Basin, Aus.	293	n.d.	148.027	254.718	77.8426	n.d.	5054.94	7.688	7.30635	293	3.37373	0.092	201.431	0.650421	0.13237	0.242563	7.25957	372.528	348.045	340.653	3.06026
TUN_746	Tasmania Basin, Aus.	293	n.d.	235.278	269.259	93.5647	n.d.	3586.85	7.7445	12.9848	293	4.10564	0.0935	239.512	0.63506	0.038	0.0652703	11.5627	295.233	273.879	285.667	0.908064
TUN_746	Tasmania Basin, Aus.	293	n.d.	206.496	410.823	101.387	n.d.	3824.22	8.559	12.7333	293	3.37614	0.105	261.825	1.73282	0.0425	0.0713327	10.3413	448.145	413.639	434.167	0.238728
TUN_746	Tasmania Basin, Aus.	293	19.915	598.662	459.09	162.277	17.3402	9413.2	9.0195	6.54801	293	22.6441	0.108	27.0599	1.92266	0.0435	0.236852	10.1884	147.286	137.31	148.674	20.9989
TUN_746	Tasmania Basin, Aus.	293	n.d.	184.775	142.482	57.8076	n.d.	4819.6	14.6725	15.4156	293	2.46684	0.1795	151.495	0.418	0.073	0.037	10.3344	252.895	235.712	239.772	0.82963
TUN_746	Tasmania Basin, Aus.	293	n.d.	110.227	168.809	45.1395	n.d.	2655.42	15.989	17.6813	293	2.06339	0.1915	281.743	0.44	0.076	0.0405	7.67008	186.764	163.237	175.978	1.51982
TUN_746	Tasmania Basin, Aus.	293	610.053	256.456	239.83	113.283	n.d.	3495.45	17.2035	3.93375	293	2.55038	0.2055	271.02	3.80062	0.084	0.134906	4.31959	522.209	507.198	509.616	1.46213
TUN_746	Tasmania Basin, Aus.	293	54.6483	137.276	304.138	46.3161	n.d.	146.738	21.7535	0.456063	293	0.1455	0.254	12.683	0.5925	0.1025	0.0525	0.34484	68.5623	63.0459	100.619	0.214939
TUN_746	Tasmania Basin, Aus.	293	214.28	958.322	2221.64	533.032	19.2665	2298.26	26.2468	250.483	293	31.5725	0.0715	81.0952	4.78668	0.0285	0.483156	73.9671	997.834	906.326	963.92	98.2045
TUN_746	Tasmania Basin, Aus.	293	619.784	442.159	1690.55	363.671	109.785	4417.6	42.9532	70.1069	293	27.5941	0.3944	180.496	3.49056	0.06549	0.49683	55.4043	742.68	675.556	704.639	44.5208
TUN_746	Tasmania Basin, Aus.	293	10.0376	47.7546	392.154	121.686	n.d.	206.944	60.9718	0.501748	293	1.27577	0.492983	18.8709	0.482	0.083	0.0445	0.419077	91.6515	82.2364	85.7957	0.85354
TUN_746	Tasmania Basin, Aus.	293	3325.35	1885.62	14623	2750.01	491.366	9931.72	336.511	359.891	293	252.805	2.59456	355.135	24.2047	0.06	4.37516	488.637	5143.44	4671.5	4836.94	357.048
TUN_799	Tasmania Basin, Aus.	294	3.926	767.408	689.912	171.212	224.013	2524.56	10.601	52.5729	294	16.992	0.065	73.8196	3.77013	0.1115	0.52353	2.68119	1404.43	1258.68	1350.7	85.6407
TUN_799	Tasmania Basin, Aus.	294	54.4131	534.73	792.312	56.2064	173.253	118.828	12.0955	2.31108	294	3.26848	1.97551	29.4228	3.32757	0.1245	0.312798	0.222037	305.096	265.873	276.272	63.3863
TUN_799	Tasmania Basin, Aus.	294	n.d.	1209.04	128.346	68.5691	36.2847	512.487	13.231	13.2905	294	2.18324	0.08	110.505	2.41632	0.1335	0.0515	0.0275	453.36	403.115	422.799	83.1566
TUN_799	Tasmania Basin, Aus.	294	n.d.	496.778	140.879	31.341	10.0111	241.996	13.315	3.53445	294	1.98085	0.083	12.6467	0.448	0.1425	0.054	0.561129	269.153	233.357	256.883	19.3122
TUN_799	Tasmania Basin, Aus.	294	109.983	1737.79	2592.02	1253.06	427.035	3145.32	15.024	64.4302	294	25.2844	0.0915	169.463	45.0976	0.154	0.554169	38.1192	1796.01	1623.79	1696.8	662.829
TUN_799	Tasmania Basin, Aus.	294	n.d.	616.597	202.507	14.1375	2.432	239.163	16.9955	31.652	294	0.485281	0.1065	4.46465	0.5755	0.1815	0.068	0.212323	118.379	103.76	108.004	13.3677
TUN_799	Tasmania Basin, Aus.	294	76.1843	841.23	948.58	286.089	112.661	1639.71	19.6384	35.1605	294	10.4119	0.355685	73.9851	10.0268	0.140375	0.363284	12.2174	894.564	810.068	839.25	152.33
TUN_799	Tasmania Basin, Aus.	294	n.d.	100.182	36.3172	20.058	7.386	1913.63	33.5638	6.66154	294	0.922574	0.228084	56.9149	1.06101	0.153	0.058	9.47456	67.3613	62.744	68.171	3.95082
TUN_799	Tasmania Basin, Aus.	294	136.415	1267.31	3006.35	674.132	20.8709	4421.71	42.2815	106.832	294	32.1783	0.215889	134.644	23.5181	0.1225	1.28428	46.4416	2742.72	2529.23	2534.37	287.001
TUN_849	Tasmania Basin, Aus.	296	n.d.	835.582	437.928	123.786	19.2976	217.701	8.975	0.676185	296	1.83371	0.09	133.78	0.231	0.051	0.0345	0.034	162.64	136.582	136.978	5.48384
TUN_849	Tasmania Basin, Aus.	296	157.224	925.12	729.659	182.526	6.65161	2657.94	10.5355	25.6644	296	15.4947	0.1025	19.9861	0.679464	0.057	0.428417	10.9524	540.691	491.162	516.091	18.238
TUN_849	Tasmania Basin, Aus.	296	n.d.	7.92478	6.22513	1.9415	5.16834	5.48	13.6535	0.244138	296	0.578268	0.135	1.82338	0.349	0.0745	0.05	0.05	17.1457	16.9592	16.1804	1.43007
TUN_849	Tasmania Basin, Aus.	296	n.d.	1530.38	1261.53	325.859	2.93912	744.569	13.837	3.20642	296	46.9158	0.135	134.981	9.21634	0.074	1.59822	2.5304	1177.1	1071.15	1108.41	185.444
TUN_849	Tasmania Basin, Aus.	296	60.1505	414.272	222.302	171.685	14.7397	127.991	14.772	1.73053	296	9.32044	0.145	8.54105	1.14936	0.0795	0.054	66.2093	105.533	89.1043	103.965	13.6588
TUN_849	Tasmania Basin, Aus.	296	16.393	381.645	350.561	39.1921	13.6911	171.041	16.6695	0.2076	296	0.517125	0.1635	3.11535	0.4235	0.0905	0.0615	0.0605	27.9698	19.2312	20.5055	2.34336
TUN_849	Tasmania Basin, Aus.	296	n.d.	35.5164	53.8772	5.41064	4.63054	1631.64	17.7015	0.068	296	0.494091	0.173	13.5107	1.26494	0.095	0.172714	0.064	48.4309	46.0218	47.1078	8.27445
TUN_849	Tasmania Basin, Aus.	296	25.4883	2129.35	2488.9	683.073	55.645	22794.2	27.6081	14.2476	296	35.9578	1.36046	137.96	7.01859	0.0625	0.587688	21.6591	1283.01	1188.15	1218.42	92.2555
TUN_849	Tasmania Basin, Aus.	296	n.d.	805.706	666.117	41.9751	5.71584	736.659	42.2446	0.405438	296	1.8948	0.157	78.4378	2.93388	0.0865	0.261893	0.861297	421.749	380.51	422.881	152.519
TUN_849	Tasmania Basin, Aus.	296	n.d.	564.736	639.949	850.262	127.441	734.066	62.4496	0.0545	296	1.76584	0.1405	62.9918	5.48991	0.0775	0.298427	0.89026	455.284	415.953	440.486	132.765
TUN_849	Tasmania Basin, Aus.	296	80.8621	21.838	1527.32	11154.9	7.4778	394.77	73.7264	0.103693	296	5.92607	0.23835	5.31678	2.63676	0.061	0.0435	0.160704	1893.15	1663.71	4035.41	8.06235
TUN_849	Tasmania Basin, Aus.	296	57.0239	673.61	790.106	1341.78	150.952	2634.32	76.814	4.36994	296	10.6308	2.82624	54.0082	2.65369	0.069875	0.300988	8.66052	518.155	466.897	679.505	51.8598
TUN_849	Tasmania Basin, Aus.	296	2.0255	431.248	1096.89	2520.68	1548.03	1395.79	619.596	5.83081	296	6.87149	31.0745	47.6542	0.451495	0.0295	0.021	0.454309	85.1502	84.2281	87.6273	1.84264
WI-2C	Tasmania Basin, Aus.	297	16.4065	348.211	281.998	10.2997	20.4199	1492.14	12.1804	2.19193	297	19.4037	0.15294	71.5789			0.256001	9.13582	347.012	315.186	330.641	0.611271	K-Ar ages of illite clays of the Meade Peak Member of the Phosphoria Formation, Western Phosphate Field, southeastern Idaho 2007, Elliott, W. Crawford; Ritter, Kristen ; Wampler, J. ; Grauch, Richard I.; Bauluz, Blanca Abstracts with Programs, 39: 630 - 630. McKelvey et al., 1953 Stratigraphic sections of the phosphoria formation, 1947-1948, part I.			A	G5-	Idaho	USA		Phosphoria	Meade Peak	phosphorite shale
WI-2C	Tasmania Basin, Aus.	297	16.9484	420.716	355.619	10.4154	9.01038	2361.08	16.2076	5.3773	297	29.0798	0.181951	107.284	0.0936818		0.488111	10.5133	508.012	463.398	481.54	0.292392	K-Ar ages of illite clays of the Meade Peak Member of the Phosphoria Formation, Western Phosphate Field, southeastern Idaho 2007, Elliott, W. Crawford; Ritter, Kristen ; Wampler, J. ; Grauch, Richard I.; Bauluz, Blanca Abstracts with Programs, 39: 630 - 630. McKelvey et al., 1953 Stratigraphic sections of the phosphoria formation, 1947-1948, part I.			A	G5-	Idaho	USA		Phosphoria	Meade Peak	phosphorite shale
WI-2C	Tasmania Basin, Aus.	297	15.8852	597.381	449.298	10.8914	8.01121	1713.24	21.0895	2.28884	297	31.116	0.156098	93.1131	0.118646		0.483931	12.1193	499.102	457.201	478.15	0.85339	K-Ar ages of illite clays of the Meade Peak Member of the Phosphoria Formation, Western Phosphate Field, southeastern Idaho 2007, Elliott, W. Crawford; Ritter, Kristen ; Wampler, J. ; Grauch, Richard I.; Bauluz, Blanca Abstracts with Programs, 39: 630 - 630. McKelvey et al., 1953 Stratigraphic sections of the phosphoria formation, 1947-1948, part I.			A	G5-	Idaho	USA		Phosphoria	Meade Peak	phosphorite shale
WI-2C	Tasmania Basin, Aus.	297	24.3649	169.053	163.505	9.11919	12.0371	6983.09	22.967	6.09524	297	8.71483	0.0735764	163.75			0.112192	12.795	337.585	307.763	320.747	0.286844	K-Ar ages of illite clays of the Meade Peak Member of the Phosphoria Formation, Western Phosphate Field, southeastern Idaho 2007, Elliott, W. Crawford; Ritter, Kristen ; Wampler, J. ; Grauch, Richard I.; Bauluz, Blanca Abstracts with Programs, 39: 630 - 630. McKelvey et al., 1953 Stratigraphic sections of the phosphoria formation, 1947-1948, part I.			A	G5-	Idaho	USA		Phosphoria	Meade Peak	phosphorite shale
WI-2C	Tasmania Basin, Aus.	297	36.2548	530.655	477.951	22.1603	16.7347	6280.95	26.5907	5.04448	297	19.6009	0.0778237	163.153	0.165134		0.45831	9.77373	943.189	859.894	900.995	0.574575	K-Ar ages of illite clays of the Meade Peak Member of the Phosphoria Formation, Western Phosphate Field, southeastern Idaho 2007, Elliott, W. Crawford; Ritter, Kristen ; Wampler, J. ; Grauch, Richard I.; Bauluz, Blanca Abstracts with Programs, 39: 630 - 630. McKelvey et al., 1953 Stratigraphic sections of the phosphoria formation, 1947-1948, part I.			A	G5-	Idaho	USA		Phosphoria	Meade Peak	phosphorite shale
WI-2C	Tasmania Basin, Aus.	297	13.0981	254.406	207.375	8.3874	11.178	8728.25	28.5149	5.73012	297	12.1431	0.128133	186.238	0.107467		0.172674	14.7757	462.079	421.356	442.453	0.337061
WI-2C	Tasmania Basin, Aus.	297	22.3094	459.492	681.051	50.3028	19.4882	7536.78	46.799	11.0151	297	16.8992		149.655	0.34205		0.274821	10.0329	818.216	748.494	782.336	3.21197	K-Ar ages of illite clays of the Meade Peak Member of the Phosphoria Formation, Western Phosphate Field, southeastern Idaho 2007, Elliott, W. Crawford; Ritter, Kristen ; Wampler, J. ; Grauch, Richard I.; Bauluz, Blanca Abstracts with Programs, 39: 630 - 630. McKelvey et al., 1953 Stratigraphic sections of the phosphoria formation, 1947-1948, part I.			A	G5-	Idaho	USA		Phosphoria	Meade Peak	phosphorite shale
WI-2C	Tasmania Basin, Aus.	297	11.7279	80.7882	96.9415	4.46672	5.53128	16930.2	48.7468	8.4091	297	5.02002		344.638			0.0904381	25.9064	448.044	408.343	426.701	0.130857	K-Ar ages of illite clays of the Meade Peak Member of the Phosphoria Formation, Western Phosphate Field, southeastern Idaho 2007, Elliott, W. Crawford; Ritter, Kristen ; Wampler, J. ; Grauch, Richard I.; Bauluz, Blanca Abstracts with Programs, 39: 630 - 630. McKelvey et al., 1953 Stratigraphic sections of the phosphoria formation, 1947-1948, part I.			A	G5-	Idaho	USA		Phosphoria	Meade Peak	phosphorite shale
WI-2R	Tasmania Basin, Aus.	297	24.8848	62.0648	129.286	58.917	9.13998	955.555	8.60066	4.30621	297	1.99301	0.175959	49.712			0.098743	14.2241	138.46	126.429	132.157	0.2345	Tuff horizon at base of Ecca Gp (Prince Albert Formation); weighted mean zircon ages 288±3 Ma and 289.6±3.8 Ma, Bangert, B., Stollhofen, H., Lorenz, V., Armstrong, R., 1999. The geochronology and significance of ash-fall tuffs in the glaciogenic Carboniferous-Permian Dwyka Group of Namibia and South Africa. Journal of African Earth Sciences 29, 33-49.		Fe matrix separation		H1-	Block B, "Sese Main" seam, African Energy Resources Sese Coalfield	Botswana	Karoo/Ecca	Tlapana	Equivalent of the F1 member of the Morupule Formation, further south	black shale with large pyrite nodules
WI-2R	Tasmania Basin, Aus.	297	9.76674	43.149	88.1945	39.9559	5.75908	715.706	11.3046	4.15405	297	1.69894	0.103387	42.6704			0.0453578	7.38108	138.08	125.181	132.176	0.192875	Tuff horizon at base of Ecca Gp (Prince Albert Formation); weighted mean zircon ages 288±3 Ma and 289.6±3.8 Ma, Bangert, B., Stollhofen, H., Lorenz, V., Armstrong, R., 1999. The geochronology and significance of ash-fall tuffs in the glaciogenic Carboniferous-Permian Dwyka Group of Namibia and South Africa. Journal of African Earth Sciences 29, 33-49.		Fe matrix separation		H1-	Block B, "Sese Main" seam, African Energy Resources Sese Coalfield	Botswana	Karoo/Ecca	Tlapana	Equivalent of the F1 member of the Morupule Formation, further south	black shale with large pyrite nodules
WI-2R	Tasmania Basin, Aus.	297	29.5322	41.7234	80.7136	34.247	9.42033	714.965	11.5801	3.93044	297	1.23928		35.7738			0.0332735	5.17302	122.846	112.858	117.598	0.26311	Tuff horizon at base of Ecca Gp (Prince Albert Formation); weighted mean zircon ages 288±3 Ma and 289.6±3.8 Ma, Bangert, B., Stollhofen, H., Lorenz, V., Armstrong, R., 1999. The geochronology and significance of ash-fall tuffs in the glaciogenic Carboniferous-Permian Dwyka Group of Namibia and South Africa. Journal of African Earth Sciences 29, 33-49.		Fe matrix separation		H1-	Block B, "Sese Main" seam, African Energy Resources Sese Coalfield	Botswana	Karoo/Ecca	Tlapana	Equivalent of the F1 member of the Morupule Formation, further south	black shale with large pyrite nodules
WI-2R	Tasmania Basin, Aus.	297	24.3325	45.8366	94.0134	37.9017	12.7376	751.361	12.2367	4.31227	297	1.65289		44.8779			0.0390774	7.41122	126.856	115.498	121.022	0.136783	Tuff horizon at base of Ecca Gp (Prince Albert Formation); weighted mean zircon ages 288±3 Ma and 289.6±3.8 Ma, Bangert, B., Stollhofen, H., Lorenz, V., Armstrong, R., 1999. The geochronology and significance of ash-fall tuffs in the glaciogenic Carboniferous-Permian Dwyka Group of Namibia and South Africa. Journal of African Earth Sciences 29, 33-49.		Fe matrix separation		H1-	Block B, "Sese Main" seam, African Energy Resources Sese Coalfield	Botswana	Karoo/Ecca	Tlapana	Equivalent of the F1 member of the Morupule Formation, further south	black shale with large pyrite nodules
WI-2R	Tasmania Basin, Aus.	297	22.1675	52.1812	121.343	54.5943	8.75451	1010.15	12.311	4.38152	297	1.59688		47.5729			0.0793597	9.21966	169.786	154.849	161.152	0.274042	Tuff horizon at base of Ecca Gp (Prince Albert Formation); weighted mean zircon ages 288±3 Ma and 289.6±3.8 Ma, Bangert, B., Stollhofen, H., Lorenz, V., Armstrong, R., 1999. The geochronology and significance of ash-fall tuffs in the glaciogenic Carboniferous-Permian Dwyka Group of Namibia and South Africa. Journal of African Earth Sciences 29, 33-49.		Fe matrix separation		H1-	Block B, "Sese Main" seam, African Energy Resources Sese Coalfield	Botswana	Karoo/Ecca	Tlapana	Equivalent of the F1 member of the Morupule Formation, further south	black shale with large pyrite nodules
WI-2R	Tasmania Basin, Aus.	297	20.7066	57.8002	106.593	50.6744	9.73204	895.392	13.134	4.17419	297	2.0174	0.109317	45.9042	0.133165		0.0712856	8.98653	168.237	154.233	160.451	0.142193	Tuff horizon at base of Ecca Gp (Prince Albert Formation); weighted mean zircon ages 288±3 Ma and 289.6±3.8 Ma, Bangert, B., Stollhofen, H., Lorenz, V., Armstrong, R., 1999. The geochronology and significance of ash-fall tuffs in the glaciogenic Carboniferous-Permian Dwyka Group of Namibia and South Africa. Journal of African Earth Sciences 29, 33-49.		Fe matrix separation		H1-	Block B, "Sese Main" seam, African Energy Resources Sese Coalfield	Botswana	Karoo/Ecca	Tlapana	Equivalent of the F1 member of the Morupule Formation, further south	black shale with large pyrite nodules
WI-2R	Tasmania Basin, Aus.	297	42.247	57.8348	126.511	53.6669	15.5179	926.937	16.4579	3.88692	297	1.88297		47.443			0.08765	8.48788	221.441	203.065	211.71	0.165531	Tuff horizon at base of Ecca Gp (Prince Albert Formation); weighted mean zircon ages 288±3 Ma and 289.6±3.8 Ma, Bangert, B., Stollhofen, H., Lorenz, V., Armstrong, R., 1999. The geochronology and significance of ash-fall tuffs in the glaciogenic Carboniferous-Permian Dwyka Group of Namibia and South Africa. Journal of African Earth Sciences 29, 33-49.		Fe matrix separation		H1-	Block B, "Sese Main" seam, African Energy Resources Sese Coalfield	Botswana	Karoo/Ecca	Tlapana	Equivalent of the F1 member of the Morupule Formation, further south	black shale with large pyrite nodules
WI-2R	Tasmania Basin, Aus.	297	1.06303	31.6638	126.116	36.8662	0.187578	1067.33	18.7758	4.51528	297	1.35282	0.141281	38.5637			0.0760893	5.61279	167.642	153.059	160.307	0.304147	Tuff horizon at base of Ecca Gp (Prince Albert Formation); weighted mean zircon ages 288±3 Ma and 289.6±3.8 Ma, Bangert, B., Stollhofen, H., Lorenz, V., Armstrong, R., 1999. The geochronology and significance of ash-fall tuffs in the glaciogenic Carboniferous-Permian Dwyka Group of Namibia and South Africa. Journal of African Earth Sciences 29, 33-49.		Fe matrix separation		H1-	Block B, "Sese Main" seam, African Energy Resources Sese Coalfield	Botswana	Karoo/Ecca	Tlapana	Equivalent of the F1 member of the Morupule Formation, further south	black shale with large pyrite nodules
WI-2R	Tasmania Basin, Aus.	297	13.7627	28.5829	155.774	37.506	7.90525	867.079	18.8884	2.97491	297	1.12413		32.5522			0.0356904	4.24664	144.327	131.774	137.571	0.155825	Tuff horizon at base of Ecca Gp (Prince Albert Formation); weighted mean zircon ages 288±3 Ma and 289.6±3.8 Ma, Bangert, B., Stollhofen, H., Lorenz, V., Armstrong, R., 1999. The geochronology and significance of ash-fall tuffs in the glaciogenic Carboniferous-Permian Dwyka Group of Namibia and South Africa. Journal of African Earth Sciences 29, 33-49.		Fe matrix separation		H1-	Block B, "Sese Main" seam, African Energy Resources Sese Coalfield	Botswana	Karoo/Ecca	Tlapana	Equivalent of the F1 member of the Morupule Formation, further south	black shale with large pyrite nodules
WI-2R	Tasmania Basin, Aus.	297	12.7555	54.5359	366.681	43.5015	4.65558	1763.25	34.2197	3.67314	297	1.57619		45.0793			0.130352	4.34386	236.135	215.891	225.144	0.228383	Tuff horizon at base of Ecca Gp (Prince Albert Formation); weighted mean zircon ages 288±3 Ma and 289.6±3.8 Ma, Bangert, B., Stollhofen, H., Lorenz, V., Armstrong, R., 1999. The geochronology and significance of ash-fall tuffs in the glaciogenic Carboniferous-Permian Dwyka Group of Namibia and South Africa. Journal of African Earth Sciences 29, 33-49.		Fe matrix separation		H1-	Block B, "Sese Main" seam, African Energy Resources Sese Coalfield	Botswana	Karoo/Ecca	Tlapana	Equivalent of the F1 member of the Morupule Formation, further south	black shale with large pyrite nodules
WI-2R	Tasmania Basin, Aus.	297	5.19821	24.1041	220.976	38.548	2.14403	1839.66	39.4359	2.96369	297	0.949023		34.1383			0.185234	2.54141	217.635	198.404	207.237	0.112426
19-1_Py_1	Selwyn Basin, Canada	304	2730.43	96.4141	1146.67	723.774	n.d.	603.518	847.077	278.589	304	37.2954	2.795	67.4153	2.82795	0.0171345	0.418822	24.6808	646.778	590.884	609.232	1.13339	Early Permian (Asselian) fossil assemblages, Banks, M.R., Hale, G.E.A., Yaxley, M.L., 1955. The Permian Rocks of Woody Island, Tasmania. Royal Society of Tasmania, Papers and Proceedings 89, 219-229, Bacon, C.A., Calver, C.R., Boreham, C.J., Leaman, D.E., Morrison, K.C., Revill, A.T., Volkman, J.K., 2000. The petroleum potential of onshore Tasmania: a review.			A	E5-	Woody Island, Tasmania	Australia	Lower Parmeener	Woody Island Siltstone	-	black pyritic siltstone with 2-10cm nodules of pyrite
19-1_Py_2	Selwyn Basin, Canada	304	3021.34	83.5748	1058.47	628.909	n.d.	607.124	867.187	298.595	304	37.4521	7.121	66.1162	3.56086	0.0306707	0.458928	22.7	638.628	584.732	599.494	2.119	Early Permian (Asselian) fossil assemblages, Banks, M.R., Hale, G.E.A., Yaxley, M.L., 1955. The Permian Rocks of Woody Island, Tasmania. Royal Society of Tasmania, Papers and Proceedings 89, 219-229, Bacon, C.A., Calver, C.R., Boreham, C.J., Leaman, D.E., Morrison, K.C., Revill, A.T., Volkman, J.K., 2000. The petroleum potential of onshore Tasmania: a review.			A	E5-	Woody Island, Tasmania	Australia	Lower Parmeener	Woody Island Siltstone	-	black pyritic siltstone with 2-10cm nodules of pyrite
19-1_Py_3	Selwyn Basin, Canada	304	2914.7	99.8783	1175.68	649.943	n.d.	608.256	866.654	293.445	304	35.4581	4.218	70.7396	2.75602	0.0394957	0.350918	23.9987	639.289	593.593	592.586	1.27615	Early Permian (Asselian) fossil assemblages, Banks, M.R., Hale, G.E.A., Yaxley, M.L., 1955. The Permian Rocks of Woody Island, Tasmania. Royal Society of Tasmania, Papers and Proceedings 89, 219-229, Bacon, C.A., Calver, C.R., Boreham, C.J., Leaman, D.E., Morrison, K.C., Revill, A.T., Volkman, J.K., 2000. The petroleum potential of onshore Tasmania: a review.			A	E5-	Woody Island, Tasmania	Australia	Lower Parmeener	Woody Island Siltstone	-	black pyritic siltstone with 2-10cm nodules of pyrite
19-1_Py_4	Selwyn Basin, Canada	304	3229.28	101.035	1451.68	1106.69	4921.3	803.634	1050.95	483.955	304	54.7519	7.545	63.7458	5.24228	0.026	0.456437	18.8332	768.342	708.864	721.372	3.55522	Early Permian (Asselian) fossil assemblages, Banks, M.R., Hale, G.E.A., Yaxley, M.L., 1955. The Permian Rocks of Woody Island, Tasmania. Royal Society of Tasmania, Papers and Proceedings 89, 219-229, Bacon, C.A., Calver, C.R., Boreham, C.J., Leaman, D.E., Morrison, K.C., Revill, A.T., Volkman, J.K., 2000. The petroleum potential of onshore Tasmania: a review.			A	E5-	Woody Island, Tasmania	Australia	Lower Parmeener	Woody Island Siltstone	-	black pyritic siltstone with 2-10cm nodules of pyrite
19-1_Py_5	Selwyn Basin, Canada	304	2950.24	132.213	1347.99	1239	2528.17	751.32	945.346	439.928	304	39.6694	3.849	57.6506	3.99846	0.0407769	0.269065	18.8879	823.868	760.736	775.224	4.4021	Early Permian (Asselian) fossil assemblages, Banks, M.R., Hale, G.E.A., Yaxley, M.L., 1955. The Permian Rocks of Woody Island, Tasmania. Royal Society of Tasmania, Papers and Proceedings 89, 219-229, Bacon, C.A., Calver, C.R., Boreham, C.J., Leaman, D.E., Morrison, K.C., Revill, A.T., Volkman, J.K., 2000. The petroleum potential of onshore Tasmania: a review.			A	E5-	Woody Island, Tasmania	Australia	Lower Parmeener	Woody Island Siltstone	-	black pyritic siltstone with 2-10cm nodules of pyrite
RC19-1	Kasmovian Shale, USA	304	2969.2	102.623	1236.1	869.662	3724.73	674.77	915.443	358.902	304	40.9254	5.1056	65.1335	3.67711	0.0308156	0.390834	21.8201	703.381	647.762	659.581	2.49717	Early Permian (Asselian) fossil assemblages, Banks, M.R., Hale, G.E.A., Yaxley, M.L., 1955. The Permian Rocks of Woody Island, Tasmania. Royal Society of Tasmania, Papers and Proceedings 89, 219-229, Bacon, C.A., Calver, C.R., Boreham, C.J., Leaman, D.E., Morrison, K.C., Revill, A.T., Volkman, J.K., 2000. The petroleum potential of onshore Tasmania: a review.			A	E5-	Woody Island, Tasmania	Australia	Lower Parmeener	Woody Island Siltstone	-	black pyritic siltstone with 2-10cm nodules of pyrite
19-2_Mtx_1	Selwyn Basin, Canada	304.5	580.655	240.817	4618.86	n.d.	8403.05	437.39	1946.65	9762.43	304.5	99.6577	n.d.	754.223	4.45713	0.151703	0.055	425.966	272.438	253.997	268.161	9.81135	Early Permian (Asselian) fossil assemblages, Banks, M.R., Hale, G.E.A., Yaxley, M.L., 1955. The Permian Rocks of Woody Island, Tasmania. Royal Society of Tasmania, Papers and Proceedings 89, 219-229, Bacon, C.A., Calver, C.R., Boreham, C.J., Leaman, D.E., Morrison, K.C., Revill, A.T., Volkman, J.K., 2000. The petroleum potential of onshore Tasmania: a review.			A	E5-	Woody Island, Tasmania	Australia	Lower Parmeener	Woody Island Siltstone	-	black pyritic siltstone with 2-10cm nodules of pyrite
19-2_Py_2	Selwyn Basin, Canada	304.5	349.529	69.2897	1737.44	n.d.	7640.37	5735.46	4895.8	4331.72	304.5	72.8188	2386.74	1644.39	2.43	0.05	0.039	175.748	391.912	215.111	207.601	2.227	Early Permian (Asselian) fossil assemblages, Banks, M.R., Hale, G.E.A., Yaxley, M.L., 1955. The Permian Rocks of Woody Island, Tasmania. Royal Society of Tasmania, Papers and Proceedings 89, 219-229, Bacon, C.A., Calver, C.R., Boreham, C.J., Leaman, D.E., Morrison, K.C., Revill, A.T., Volkman, J.K., 2000. The petroleum potential of onshore Tasmania: a review.			A	E5-	Woody Island, Tasmania	Australia	Lower Parmeener	Woody Island Siltstone	-	black pyritic siltstone with 2-10cm nodules of pyrite
19-2_Py_3	Selwyn Basin, Canada	304.5	258.821	41.726	1025.65	n.d.	7636.09	4676.93	4946.44	2162.85	304.5	64.3801	2552.62	1388.3	1.894	0.041	0.034404	107.989	399.532	252.223	245.494	1.18972	Early Permian (Asselian) fossil assemblages, Banks, M.R., Hale, G.E.A., Yaxley, M.L., 1955. The Permian Rocks of Woody Island, Tasmania. Royal Society of Tasmania, Papers and Proceedings 89, 219-229, Bacon, C.A., Calver, C.R., Boreham, C.J., Leaman, D.E., Morrison, K.C., Revill, A.T., Volkman, J.K., 2000. The petroleum potential of onshore Tasmania: a review.			A	E5-	Woody Island, Tasmania	Australia	Lower Parmeener	Woody Island Siltstone	-	black pyritic siltstone with 2-10cm nodules of pyrite
19-2_Py_5	Selwyn Basin, Canada	304.5	384.447	79.7271	2033.21	n.d.	5149.31	3600.64	2354.15	4452.3	304.5	70.8106	n.d.	904.989	2.399	0.05	0.038	148.434	313.347	167.84	166.029	2.46364	Early Permian (Asselian) fossil assemblages, Banks, M.R., Hale, G.E.A., Yaxley, M.L., 1955. The Permian Rocks of Woody Island, Tasmania. Royal Society of Tasmania, Papers and Proceedings 89, 219-229, Bacon, C.A., Calver, C.R., Boreham, C.J., Leaman, D.E., Morrison, K.C., Revill, A.T., Volkman, J.K., 2000. The petroleum potential of onshore Tasmania: a review.			A	E5-	Woody Island, Tasmania	Australia	Lower Parmeener	Woody Island Siltstone	-	black pyritic siltstone with 2-10cm nodules of pyrite
19-2_Py_6	Selwyn Basin, Canada	304.5	282.108	39.178	955.918	n.d.	4052.3	5730.92	4438.52	2682.34	304.5	50.159	847.214	1608.19	1.952	0.04	0.032	147.556	391.623	192.496	168.322	1.005	Early Permian (Asselian) fossil assemblages, Banks, M.R., Hale, G.E.A., Yaxley, M.L., 1955. The Permian Rocks of Woody Island, Tasmania. Royal Society of Tasmania, Papers and Proceedings 89, 219-229, Bacon, C.A., Calver, C.R., Boreham, C.J., Leaman, D.E., Morrison, K.C., Revill, A.T., Volkman, J.K., 2000. The petroleum potential of onshore Tasmania: a review.			A	E5-	Woody Island, Tasmania	Australia	Lower Parmeener	Woody Island Siltstone	-	black pyritic siltstone with 2-10cm nodules of pyrite
RC19-2	Kasmovian Shale, USA	304.5	371.112	94.1476	2074.22		6576.23	4036.27	3716.31	4678.33	304.5	71.5652	1928.86	1260.02	2.62643	0.0665406	0.0396808	201.138	353.77	216.333	211.121	3.33934	Early Permian (Asselian) fossil assemblages, Banks, M.R., Hale, G.E.A., Yaxley, M.L., 1955. The Permian Rocks of Woody Island, Tasmania. Royal Society of Tasmania, Papers and Proceedings 89, 219-229, Bacon, C.A., Calver, C.R., Boreham, C.J., Leaman, D.E., Morrison, K.C., Revill, A.T., Volkman, J.K., 2000. The petroleum potential of onshore Tasmania: a review.			A	E5-	Woody Island, Tasmania	Australia	Lower Parmeener	Woody Island Siltstone	-	black pyritic siltstone with 2-10cm nodules of pyrite
19-4_Py_2	Selwyn Basin, Canada	305	1009.13	18.755	553.318	514.793	n.d.	1045.38	254.16	37.1127	305	66.3525	n.d.	66.2612	2.1464	0.023	0.055	4.99404	653.183	605.064	614.936	2.40874	Early Permian (Asselian) fossil assemblages, Banks, M.R., Hale, G.E.A., Yaxley, M.L., 1955. The Permian Rocks of Woody Island, Tasmania. Royal Society of Tasmania, Papers and Proceedings 89, 219-229, Bacon, C.A., Calver, C.R., Boreham, C.J., Leaman, D.E., Morrison, K.C., Revill, A.T., Volkman, J.K., 2000. The petroleum potential of onshore Tasmania: a review.			A	E5-	Woody Island, Tasmania	Australia	Lower Parmeener	Woody Island Siltstone	-	black pyritic siltstone with 2-10cm nodules of pyrite
19-4_Py_3	Selwyn Basin, Canada	305	543.991	30.4928	986.416	588.742	n.d.	451.397	306.162	60.2518	305	38.8514	n.d.	67.4535	1.89605	0.0259453	0.035	21.6678	458.571	410.859	417.847	2.08626	Early Permian (Asselian) fossil assemblages, Banks, M.R., Hale, G.E.A., Yaxley, M.L., 1955. The Permian Rocks of Woody Island, Tasmania. Royal Society of Tasmania, Papers and Proceedings 89, 219-229, Bacon, C.A., Calver, C.R., Boreham, C.J., Leaman, D.E., Morrison, K.C., Revill, A.T., Volkman, J.K., 2000. The petroleum potential of onshore Tasmania: a review.			A	E5-	Woody Island, Tasmania	Australia	Lower Parmeener	Woody Island Siltstone	-	black pyritic siltstone with 2-10cm nodules of pyrite
19-4_Py_4	Selwyn Basin, Canada	305	679.2	14.5561	453.163	325.003	n.d.	567.681	169.699	43.3164	305	25.541	n.d.	51.8476	0.910601	0.011	0.02	2.93389	289.345	268.313	281.532	1.09801	Early Permian (Asselian) fossil assemblages, Banks, M.R., Hale, G.E.A., Yaxley, M.L., 1955. The Permian Rocks of Woody Island, Tasmania. Royal Society of Tasmania, Papers and Proceedings 89, 219-229, Bacon, C.A., Calver, C.R., Boreham, C.J., Leaman, D.E., Morrison, K.C., Revill, A.T., Volkman, J.K., 2000. The petroleum potential of onshore Tasmania: a review.			A	E5-	Woody Island, Tasmania	Australia	Lower Parmeener	Woody Island Siltstone	-	black pyritic siltstone with 2-10cm nodules of pyrite
19-4_Py_5	Selwyn Basin, Canada	305	819.862	23.011	847.237	575.081	n.d.	744.933	271.952	52.0621	305	67.6575	n.d.	93.4892	1.49228	0.014	0.0363644	7.5934	740.547	683.065	692.416	2.05031	Early Permian (Asselian) fossil assemblages, Banks, M.R., Hale, G.E.A., Yaxley, M.L., 1955. The Permian Rocks of Woody Island, Tasmania. Royal Society of Tasmania, Papers and Proceedings 89, 219-229, Bacon, C.A., Calver, C.R., Boreham, C.J., Leaman, D.E., Morrison, K.C., Revill, A.T., Volkman, J.K., 2000. The petroleum potential of onshore Tasmania: a review.			A	E5-	Woody Island, Tasmania	Australia	Lower Parmeener	Woody Island Siltstone	-	black pyritic siltstone with 2-10cm nodules of pyrite
19-4_Py_6	Selwyn Basin, Canada	305	310.79	24.689	641.022	415.112	n.d.	510.509	206.68	43.2684	305	31.9198	n.d.	49.2275	1.005	0.022	0.028	29.2952	340.715	311.41	317.88	1.26341	Early Permian (Asselian) fossil assemblages, Banks, M.R., Hale, G.E.A., Yaxley, M.L., 1955. The Permian Rocks of Woody Island, Tasmania. Royal Society of Tasmania, Papers and Proceedings 89, 219-229, Bacon, C.A., Calver, C.R., Boreham, C.J., Leaman, D.E., Morrison, K.C., Revill, A.T., Volkman, J.K., 2000. The petroleum potential of onshore Tasmania: a review.			A	E5-	Woody Island, Tasmania	Australia	Lower Parmeener	Woody Island Siltstone	-	black pyritic siltstone with 2-10cm nodules of pyrite
RC19-4	Hushpuckney Sh. USA	305	672.595	22.3008	696.231	483.746		663.979	241.731	47.2023	305	46.0645		65.6558	1.49007	0.0191891	0.0348729	13.2969	496.472	455.742	464.922	1.78135	Early Permian (Asselian) fossil assemblages, Banks, M.R., Hale, G.E.A., Yaxley, M.L., 1955. The Permian Rocks of Woody Island, Tasmania. Royal Society of Tasmania, Papers and Proceedings 89, 219-229, Bacon, C.A., Calver, C.R., Boreham, C.J., Leaman, D.E., Morrison, K.C., Revill, A.T., Volkman, J.K., 2000. The petroleum potential of onshore Tasmania: a review.			A	E5-	Woody Island, Tasmania	Australia	Lower Parmeener	Woody Island Siltstone	-	black pyritic siltstone with 2-10cm nodules of pyrite
RMC 13A	Hushpuckney Sh. USA	305	566.406	55.8427	2411.42	59.7933	2436.57	72.111	172.362	1579.5	305	13.1681	40.214	92.4006	0.88016			24.0146	147.958	119.889	120.105	0.894149	Upper Carboniferous (Upper Pennsylvanian) fossil assemblages, Zangerl, R., Richardson, E.S., 1963. The paleoecological history of two Pennsylvanian black shales. Chicago Natural History Museum, Chicago.			dif	missed	Kansas City, Missouri	USA	-	Linton	Hushpuckney	laminated organic-rich black shale; pyrite <1%
RMC 13A	Hushpuckney Sh. USA	305	363.641	53.7394	2836.16	92.4048	1713.11	88.4221	189.445	1634.81	305	12.9548	65.4032	90.3451				17.873	177.492	144.959	145.304	1.16252	Upper Carboniferous (Upper Pennsylvanian) fossil assemblages, Zangerl, R., Richardson, E.S., 1963. The paleoecological history of two Pennsylvanian black shales. Chicago Natural History Museum, Chicago.			dif	missed	Kansas City, Missouri	USA	-	Linton	Hushpuckney	laminated organic-rich black shale; pyrite <1%
RMC 13A	Hushpuckney Sh. USA	305	366.12	64.0389	3890.34	98.3645	4461.37	54.6295	197.923	1992.48	305	13.1744	89.4568	112.654				12.7099	158.827	123.876	123.597	1.08437	Upper Carboniferous (Upper Pennsylvanian) fossil assemblages, Zangerl, R., Richardson, E.S., 1963. The paleoecological history of two Pennsylvanian black shales. Chicago Natural History Museum, Chicago.			dif	missed	Kansas City, Missouri	USA	-	Linton	Hushpuckney	laminated organic-rich black shale; pyrite <1%
RMC 13A	Hushpuckney Sh. USA	305	446.778	72.4231	4034.87	144.176	6829.74	72.0113	234.093	2152.5	305	17.5644	150.214	159.258				20.3403	216.472	177.302	176.825	1.77239	Upper Carboniferous (Upper Pennsylvanian) fossil assemblages, Zangerl, R., Richardson, E.S., 1963. The paleoecological history of two Pennsylvanian black shales. Chicago Natural History Museum, Chicago.			dif	missed	Kansas City, Missouri	USA	-	Linton	Hushpuckney	laminated organic-rich black shale; pyrite <1%
RMC 13A	Hushpuckney Sh. USA	305	545.441	78.3027	3829.14	73.227	13.3246	108.417	264.749	2297.23	305	19.1188	22.0803	165.915	1.67962			30.7541	259.936	211.016	209.344	1.851	Upper Carboniferous (Upper Pennsylvanian) fossil assemblages, Zangerl, R., Richardson, E.S., 1963. The paleoecological history of two Pennsylvanian black shales. Chicago Natural History Museum, Chicago.			dif	missed	Kansas City, Missouri	USA	-	Linton	Hushpuckney	laminated organic-rich black shale; pyrite <1%
RMC 13A	Hushpuckney Sh. USA	305	335.26	61.7566	3031.8	178.796	4819.43	255.434	285.032	1194.19	305	19.0305	91.5996	98.4934	1.15146			35.5509	176.61	144.097	143.115	1.05313	Upper Carboniferous (Upper Pennsylvanian) fossil assemblages, Zangerl, R., Richardson, E.S., 1963. The paleoecological history of two Pennsylvanian black shales. Chicago Natural History Museum, Chicago.			dif	missed	Kansas City, Missouri	USA	-	Linton	Hushpuckney	laminated organic-rich black shale; pyrite <1%
RMC 13A	Hushpuckney Sh. USA	305	240.921	55.5387	3833.11	398.619	8303.38	178.04	336.416	2521.63	305	66.482	154.784	213.911	3.14046			57.0204	361.313	284.974	273.262	1.61268
RMC 13A	Hushpuckney Sh. USA	305	412.088	94.9103	5547.81	183.918	1562.29	178.377	365.731	3240.52	305	33.8783	91.779	213.054	3.13378	0.0695271		50.3466	358.81	301.781	303.722	2.61839	Upper Carboniferous (Upper Pennsylvanian) fossil assemblages, Zangerl, R., Richardson, E.S., 1963. The paleoecological history of two Pennsylvanian black shales. Chicago Natural History Museum, Chicago.			dif	missed	Kansas City, Missouri	USA	-	Linton	Hushpuckney	laminated organic-rich black shale; pyrite <1%
RMC 13A	Hushpuckney Sh. USA	305	708.814	65.8141	2887.45	196.067	2109.71	173.303	365.832	2155.67	305	32.3625	38.1301	157.781				63.1706	302.834	233.972	233.42	1.49183	Early Permian (Asselian) fossil assemblages, Banks, M.R., Hale, G.E.A., Yaxley, M.L., 1955. The Permian Rocks of Woody Island, Tasmania. Royal Society of Tasmania, Papers and Proceedings 89, 219-229, Bacon, C.A., Calver, C.R., Boreham, C.J., Leaman, D.E., Morrison, K.C., Revill, A.T., Volkman, J.K., 2000. The petroleum potential of onshore Tasmania: a review.			A	E5-	Woody Island, Tasmania	Australia	Lower Parmeener	Woody Island Siltstone	-	black pyritic siltstone with 2-10cm nodules of pyrite
RMC 13A	Hushpuckney Sh. USA	305	355.321	73.1024	3879.97	329.632	5365.09	249.046	368.567	2266.45	305	31.0421	207.422	225.811	2.63418			65.3866	332.791	279.772	281.777	3.00316	Upper Carboniferous (Upper Pennsylvanian) fossil assemblages, Zangerl, R., Richardson, E.S., 1963. The paleoecological history of two Pennsylvanian black shales. Chicago Natural History Museum, Chicago.			dif	missed	Kansas City, Missouri	USA	-	Linton	Hushpuckney	laminated organic-rich black shale; pyrite <1%
RMC 13A	Hushpuckney Sh. USA	305	510.187	71.5286	3537.17	328.69	5749.62	319.551	456.668	2652.74	305	83.3884	97.6347	265.864	2.25741			65.4777	487.617	399.494	365.289	2.14557	Upper Carboniferous (Upper Pennsylvanian) fossil assemblages, Zangerl, R., Richardson, E.S., 1963. The paleoecological history of two Pennsylvanian black shales. Chicago Natural History Museum, Chicago.			dif	missed	Kansas City, Missouri	USA	-	Linton	Hushpuckney	laminated organic-rich black shale; pyrite <1%
RMC 13A	Hushpuckney Sh. USA	305	636.261	42.6624	2109.77	236.911	5955.46	322.124	617.554	1135.54	305	164.534	82.5072	165.34	1.23986		0.0783631	58.0701	303.276	235.082	227.537	1.1837	Upper Carboniferous (Upper Pennsylvanian) fossil assemblages, Zangerl, R., Richardson, E.S., 1963. The paleoecological history of two Pennsylvanian black shales. Chicago Natural History Museum, Chicago.			dif	missed	Kansas City, Missouri	USA	-	Linton	Hushpuckney	laminated organic-rich black shale; pyrite <1%
RMC 13A	Hushpuckney Sh. USA	305	6327	22.2469	2143.05	577.615	385.859	212.69	963.098	1051.28	305	174.068	31.685	170.953	3.54899		0.761466	182.69	509.609	435.183	453.305	7.70275	Upper Carboniferous (Upper Pennsylvanian) fossil assemblages, Zangerl, R., Richardson, E.S., 1963. The paleoecological history of two Pennsylvanian black shales. Chicago Natural History Museum, Chicago.			dif	missed	Kansas City, Missouri	USA	-	Linton	Hushpuckney	laminated organic-rich black shale; pyrite <1%
19-9_Py_1	Mecca Quy. Shale USA	307	426.447	147.891	1767.17	1574.69	2182.67	4019.18	3769.59	2344.19	307	61.3096	126.075	1063.84	1.81165	0.024	0.026	158.237	467.394	272.861	263.671	3.23077	Upper Carboniferous (Upper Pennsylvanian) fossil assemblages, Zangerl, R., Richardson, E.S., 1963. The paleoecological history of two Pennsylvanian black shales. Chicago Natural History Museum, Chicago.			dif	missed	Kansas City, Missouri	USA	-	Linton	Hushpuckney	laminated organic-rich black shale; pyrite <1%
19-9_Py_2	Mecca Quy. Shale USA	307	77.2792	32.571	470.257	350.296	986.443	4510.44	2646.97	2640.06	307	24.8339	209.825	1146.26	1.15637	0.021	0.022	132.899	1283.74	504.749	475.495	1.36482	Upper Carboniferous (Upper Pennsylvanian) fossil assemblages, Zangerl, R., Richardson, E.S., 1963. The paleoecological history of two Pennsylvanian black shales. Chicago Natural History Museum, Chicago.			dif	missed	Kansas City, Missouri	USA	-	Linton	Hushpuckney	laminated organic-rich black shale; pyrite <1%
19-9_Py_3	Mecca Quy. Shale USA	307	419.77	28.822	305.562	290.573	496.46	20.406	11328.6	764.72	307	5.04362	26.4897	36.279	0.439	0.01	0.012	436.864	32.7982	18.2964	17.8439	0.821062
19-9_Py_4	Mecca Quy. Shale USA	307	459.23	32.398	341.383	270.155	477.413	22.924	11601.4	858.052	307	7.65089	26.9115	40.615	0.493	0.011	0.0234049	248.481	34.4021	19.418	18.832	0.852501	Upper Carboniferous (Upper Pennsylvanian) fossil assemblages, Zangerl, R., Richardson, E.S., 1963. The paleoecological history of two Pennsylvanian black shales. Chicago Natural History Museum, Chicago.			A	H3-	Kentucky	USA	-	Linton	Mecca Quarry Shale	laminated organic-rich black shale; pyrite <1%
19-9_Py_5	Mecca Quy. Shale USA	307	322.857	51.87	546.511	244.747	326.421	36.019	12856.1	1367.09	307	4.96005	16.8479	65.198	0.758	0.017	0.02	230.173	37.511	22.367	22.98	0.936119	Upper Carboniferous (Upper Pennsylvanian) fossil assemblages, Zangerl, R., Richardson, E.S., 1963. The paleoecological history of two Pennsylvanian black shales. Chicago Natural History Museum, Chicago.			A	H3-	Kentucky	USA	-	Linton	Mecca Quarry Shale	laminated organic-rich black shale; pyrite <1%
19-9_Py_6	Mecca Quy. Shale USA	307	314.07	106.118	1123.83	281.263	689.36	65.558	10618.9	2852.21	307	8.694	23.3369	133.386	1.119	0.024	0.034	212.936	77.867	47.117	48.206	1.353	Upper Carboniferous (Upper Pennsylvanian) fossil assemblages, Zangerl, R., Richardson, E.S., 1963. The paleoecological history of two Pennsylvanian black shales. Chicago Natural History Museum, Chicago.			A	H3-	Kentucky	USA	-	Linton	Mecca Quarry Shale	laminated organic-rich black shale; pyrite <1%
19-9_Py_7	Mecca Quy. Shale USA	307	175.68	98.64	1056.48	434.729	641.191	63.825	3515.25	2614.08	307	8.319	20.3262	127.15	1.065	0.023	0.031	163.715	73.3	43.974	45.012	1.244	Upper Carboniferous (Upper Pennsylvanian) fossil assemblages, Zangerl, R., Richardson, E.S., 1963. The paleoecological history of two Pennsylvanian black shales. Chicago Natural History Museum, Chicago.			A	H3-	Kentucky	USA	-	Linton	Mecca Quarry Shale	laminated organic-rich black shale; pyrite <1%
RC19-9	Mecca Quy. Shale USA	307	313.619	71.1872	801.599	492.351	828.566	1248.34	8048.12	1920.06	307	17.2587	64.2589	373.247	0.977432	0.0185714	0.0240578	226.186	286.716	132.683	127.434	1.40033	Upper Carboniferous (Upper Pennsylvanian) fossil assemblages, Zangerl, R., Richardson, E.S., 1963. The paleoecological history of two Pennsylvanian black shales. Chicago Natural History Museum, Chicago.			A	H3-	Kentucky	USA	-	Linton	Mecca Quarry Shale	laminated organic-rich black shale; pyrite <1%
19-10_Py_1	Linton Fm. USA	308	444.696	50.022	1173.07	436.388	5475.52	3365.97	1492.61	3243.82	308	19.2333	453.543	172.808	1.754	0.065	0.024	191.873	512.015	171.482	162.225	1.601	Upper Carboniferous (Upper Pennsylvanian) fossil assemblages, Zangerl, R., Richardson, E.S., 1963. The paleoecological history of two Pennsylvanian black shales. Chicago Natural History Museum, Chicago.			A	H3-	Kentucky	USA	-	Linton	Mecca Quarry Shale	laminated organic-rich black shale; pyrite <1%
19-10_Py_2	Linton Fm. USA	308	5561.66	80.8613	3225.01	1341.5	4883.86	802.159	2446.15	5522.36	308	124.585	314.084	265.437	4.42401	0.045	0.024	504.299	338.011	194.146	194.321	3.38622	Upper Carboniferous (Upper Pennsylvanian) fossil assemblages, Zangerl, R., Richardson, E.S., 1963. The paleoecological history of two Pennsylvanian black shales. Chicago Natural History Museum, Chicago.			A	H3-	Kentucky	USA	-	Linton	Mecca Quarry Shale	laminated organic-rich black shale; pyrite <1%
19-10_Py_3	Linton Fm. USA	308	6766.73	49.3845	3887.73	3117.84	186.728	436.239	13740.1	1875.37	308	195.456	20.5132	187.619	1.48188	0.022	0.0211099	2165.65	278.889	219.066	219.464	3.48494	Upper Carboniferous (Upper Pennsylvanian) fossil assemblages, Zangerl, R., Richardson, E.S., 1963. The paleoecological history of two Pennsylvanian black shales. Chicago Natural History Museum, Chicago.			A	H3-	Kentucky	USA	-	Linton	Mecca Quarry Shale	laminated organic-rich black shale; pyrite <1%
19-10_Py_4	Linton Fm. USA	308	7849.86	41.0251	1298.41	2811.46	1890.96	670.835	2561.15	2380.22	308	81.1822	25.17	168.237	2.68318	0.029	0.0174113	453.925	603.161	552.751	570.385	5.26075	Upper Carboniferous (Upper Pennsylvanian) fossil assemblages, Zangerl, R., Richardson, E.S., 1963. The paleoecological history of two Pennsylvanian black shales. Chicago Natural History Museum, Chicago.			dif	missed	Perry County, Illinois	USA	-	Linton	Anna Shale	laminated organic-rich black shale; pyrite <1%
19-10_Py_5	Linton Fm. USA	308	3521.69	109.112	3935.12	9177.07	437.783	928.611	2789.68	6567.86	308	105.917	16.2041	353.019	4.98878	0.076	0.053	663.071	993.195	910.183	945.287	14.5031	Upper Carboniferous (Upper Pennsylvanian) fossil assemblages, Zangerl, R., Richardson, E.S., 1963. The paleoecological history of two Pennsylvanian black shales. Chicago Natural History Museum, Chicago.			dif	missed	Perry County, Illinois	USA	-	Linton	Anna Shale	laminated organic-rich black shale; pyrite <1%
19-10_Py_6	Linton Fm. USA	308	330.781	324.419	1801.34	245.167	692.439	333.566	806.326	3057.18	308	6.71801	33.243	103.958	1.252	0.043	0.021	411.738	30.319	47.5852	50.1007	2.79842	Upper Carboniferous (Upper Pennsylvanian) fossil assemblages, Zangerl, R., Richardson, E.S., 1963. The paleoecological history of two Pennsylvanian black shales. Chicago Natural History Museum, Chicago.			dif	missed	Perry County, Illinois	USA	-	Linton	Anna Shale	laminated organic-rich black shale; pyrite <1%
RC19-10	Linton Fm. USA	308	4079.24	109.137	2553.45	2854.9	2261.21	1089.56	3972.68	3774.47	308	88.8486	143.793	208.513	2.76398	0.0466667	0.0267535	731.76	459.265	349.202	356.964	5.17241	Upper Carboniferous (Upper Pennsylvanian) fossil assemblages, Zangerl, R., Richardson, E.S., 1963. The paleoecological history of two Pennsylvanian black shales. Chicago Natural History Museum, Chicago.			dif	missed	Perry County, Illinois	USA	-	Linton	Anna Shale	laminated organic-rich black shale; pyrite <1%
19-5_Py_1	Tebo Coal. USA	308.6	5707.85	31.2443	1033.97	2883.44	166.018	787.03	5913.68	130.573	308.6	721.451	4.49982	117.537	0.886	0.03	0.132414	130.611	2889.06	2630.82	2708.97	5.59966	Upper Carboniferous (Upper Pennsylvanian) fossil assemblages, Zangerl, R., Richardson, E.S., 1963. The paleoecological history of two Pennsylvanian black shales. Chicago Natural History Museum, Chicago.			dif	missed	Perry County, Illinois	USA	-	Linton	Anna Shale	laminated organic-rich black shale; pyrite <1%
19-5_Py_2	Tebo Coal. USA	308.6	3532.62	89.1736	2412.32	3992.77	381.697	939.554	4863.26	158.727	308.6	535.756	6.73006	169.195	1.97819	0.0935003	0.0999274	103.155	3388.95	3020.84	3099.02	8.30396	Upper Carboniferous (Upper Pennsylvanian) fossil assemblages, Zangerl, R., Richardson, E.S., 1963. The paleoecological history of two Pennsylvanian black shales. Chicago Natural History Museum, Chicago.			dif	missed	Perry County, Illinois	USA	-	Linton	Anna Shale	laminated organic-rich black shale; pyrite <1%
19-5_Py_3	Tebo Coal. USA	308.6	326.746	62.177	856.89	1835.68	17.0798	1615.85	7373.78	179.42	308.6	65.5659	3.03286	627.704	0.639	0.022	0.019	39.2196	3598.19	3198.5	3315.71	3.61658	Upper Carboniferous (Upper Pennsylvanian) fossil assemblages, Zangerl, R., Richardson, E.S., 1963. The paleoecological history of two Pennsylvanian black shales. Chicago Natural History Museum, Chicago.			dif	missed	Perry County, Illinois	USA	-	Linton	Anna Shale	laminated organic-rich black shale; pyrite <1%
19-5_Py_4	Tebo Coal. USA	308.6	100.612	101.103	1587.94	1708.41	28.173	1942.57	2946.96	387.119	308.6	66.89	3.96525	532.244	0.259	0.011	0.0229425	34.4791	3277.78	2890.93	3000.55	5.46288	Upper Carboniferous (Upper Pennsylvanian) fossil assemblages, Zangerl, R., Richardson, E.S., 1963. The paleoecological history of two Pennsylvanian black shales. Chicago Natural History Museum, Chicago.			dif	missed	Perry County, Illinois	USA	-	Linton	Anna Shale	laminated organic-rich black shale; pyrite <1%
19-5_Py_5	Tebo Coal. USA	308.6	118.919	107.093	1725.57	1996.23	24.1724	2073.4	4480.64	265.46	308.6	71.7409	4.72132	581.396	0.31	0.013	0.0244493	38.4595	3802.34	3366.53	3508.2	5.78214	Upper Carboniferous (Upper Pennsylvanian) fossil assemblages, Zangerl, R., Richardson, E.S., 1963. The paleoecological history of two Pennsylvanian black shales. Chicago Natural History Museum, Chicago.			dif	missed	Perry County, Illinois	USA	-	Linton	Anna Shale	laminated organic-rich black shale; pyrite <1%
19-5_Py_6	Tebo Coal. USA	308.6	369.45	55.0242	1386.3	1506.25	16.917	1322.58	4191.69	344.374	308.6	55.4952	1.48383	472.197	0.973	0.025	0.024	25.9547	3012.91	2711.23	2898.84	4.24555	Upper Carboniferous (Upper Pennsylvanian) fossil assemblages, Zangerl, R., Richardson, E.S., 1963. The paleoecological history of two Pennsylvanian black shales. Chicago Natural History Museum, Chicago.			dif	missed	Perry County, Illinois	USA	-	Linton	Anna Shale	laminated organic-rich black shale; pyrite <1%
RC19-5	Tebo Coal. USA	308.6	1692.7	74.3026	1500.5	2320.46	105.676	1446.83	4961.67	244.279	308.6	252.817	4.07219	416.712	0.840865	0.0324167	0.0537889	61.9799	3328.2	2969.81	3088.55	5.5018	Upper Carboniferous (Upper Pennsylvanian) fossil assemblages, Zangerl, R., Richardson, E.S., 1963. The paleoecological history of two Pennsylvanian black shales. Chicago Natural History Museum, Chicago.			dif	missed	Perry County, Illinois	USA	-	Linton	Anna Shale	laminated organic-rich black shale; pyrite <1%
RMC (MECCA) G9	Mecca Quy. Shale USA	310	315.921	388.953	1445.72			1045.84	921.485	1954.41	310	11.7337	168.377	93.9923	1.44075		0.0716265	235.694	106.815	80.7012	84.4774	1.48053	Upper Carboniferous (Upper Pennsylvanian) fossil assemblages, Zangerl, R., Richardson, E.S., 1963. The paleoecological history of two Pennsylvanian black shales. Chicago Natural History Museum, Chicago.			dif	missed	Perry County, Illinois	USA	-	Linton	Anna Shale	laminated organic-rich black shale; pyrite <1%
RMC (MECCA) G9	Mecca Quy. Shale USA	310	724.398	403.692	6303.3	157.151	8179.47	737.503	1398.92	3679.87	310	21.0423	238.086	200.879	2.17019	0.0151733	0.0940173	98.4552	261.126	199.471	206.106	3.82446	Upper Carboniferous (Upper Pennsylvanian) fossil assemblages, Zangerl, R., Richardson, E.S., 1963. The paleoecological history of two Pennsylvanian black shales. Chicago Natural History Museum, Chicago.			dif	missed	Perry County, Illinois	USA	-	Linton	Anna Shale	laminated organic-rich black shale; pyrite <1%
RMC (MECCA) G9	Mecca Quy. Shale USA	310	733.076	307.049	4044.84	415.826	7258.48	602.58	1415.94	4656.02	310	32.7845	250.21	209.486	4.00042	0.052893	0.0948257	331.396	226.886	155.992	157.169	6.7325	Upper Carboniferous (Upper Pennsylvanian) fossil assemblages, Zangerl, R., Richardson, E.S., 1963. The paleoecological history of two Pennsylvanian black shales. Chicago Natural History Museum, Chicago.			dif	missed	Perry County, Illinois	USA	-	Linton	Anna Shale	laminated organic-rich black shale; pyrite <1%
RMC (MECCA) G9	Mecca Quy. Shale USA	310	837.848	302.682	5055.38	837.295	8456.46	693.659	1538.25	2702.16	310	32.7076	330.342	230.932	2.51033		0.0563801	101.836	287.796	232.966	243.869	4.22895	Upper Carboniferous (Upper Pennsylvanian) fossil assemblages, Zangerl, R., Richardson, E.S., 1963. The paleoecological history of two Pennsylvanian black shales. Chicago Natural History Museum, Chicago.			dif	missed	Perry County, Illinois	USA	-	Linton	Anna Shale	laminated organic-rich black shale; pyrite <1%
RMC (MECCA) G9	Mecca Quy. Shale USA	310	189.143	105.249	2048.55	1394.25	7820.96	1139.03	1593.54	3296.62	310	24.6861	314.921	187.949	1.00438			61.966	435.09	189.111	184.155	2.17452	Upper Carboniferous (Upper Pennsylvanian) fossil assemblages, Zangerl, R., Richardson, E.S., 1963. The paleoecological history of two Pennsylvanian black shales. Chicago Natural History Museum, Chicago.			dif	missed	Perry County, Illinois	USA	-	Linton	Anna Shale	laminated organic-rich black shale; pyrite <1%
RMC (MECCA) G9	Mecca Quy. Shale USA	310	685.147	190.336	3217.38	317.289	5927.62	1081.63	2305.79	2752.28	310	47.2163	213.3	100.414	1.80298		0.0977328	336.198	189.156	142.423	143.575	3.25721	Upper Carboniferous (Upper Pennsylvanian) fossil assemblages, Zangerl, R., Richardson, E.S., 1963. The paleoecological history of two Pennsylvanian black shales. Chicago Natural History Museum, Chicago.			dif	missed	Perry County, Illinois	USA	-	Linton	Anna Shale	laminated organic-rich black shale; pyrite <1%
RMC (MECCA) G9	Mecca Quy. Shale USA	310	624.378	310.065	6347.74	617.758	4933.74	1221.99	2875.5	3895.74	310	35.3704	628.931	291.968	3.82801		0.0739081	178.613	370.63	289.594	297.071	5.28318	Upper Carboniferous (Upper Pennsylvanian) fossil assemblages, Zangerl, R., Richardson, E.S., 1963. The paleoecological history of two Pennsylvanian black shales. Chicago Natural History Museum, Chicago.			dif	missed	Perry County, Illinois	USA	-	Linton	Anna Shale	laminated organic-rich black shale; pyrite <1%
RMC (MECCA) G9	Mecca Quy. Shale USA	310	561.019	331.61	5652.77	342.029	1574.64	1078.71	4070.06	4684.17	310	30.4878	426.755	257.892	3.26359		0.0718029	192.779	302.559	228.563	234.993	4.44666	Upper Carboniferous (Upper Pennsylvanian) fossil assemblages, Zangerl, R., Richardson, E.S., 1963. The paleoecological history of two Pennsylvanian black shales. Chicago Natural History Museum, Chicago.			dif	missed	Perry County, Illinois	USA	-	Linton	Anna Shale	laminated organic-rich black shale; pyrite <1%
RMC JB	Anna Shale, USA	310	453.982	71.4986	2214.85	677.114	3769.73	57.7771	565.347	428.617	310	17.925	27.5055	77.1102	1.33968			6.47064	78.1575	56.6195	54.7919	2.44562	Upper Carboniferous (Upper Pennsylvanian) fossil assemblages, Zangerl, R., Richardson, E.S., 1963. The paleoecological history of two Pennsylvanian black shales. Chicago Natural History Museum, Chicago.			dif	missed	Perry County, Illinois	USA	-	Linton	Anna Shale	laminated organic-rich black shale; pyrite <1%
RMC JB	Anna Shale, USA	310	473.675	53.4655	1682.62	511.276	1463.89	42.3305	650.2	301.585	310	23.2048	7.13746	45.1155	0.571944			6.33318	97.7778	44.1205	44.8547	1.44783	Upper Carboniferous (Upper Pennsylvanian) fossil assemblages, Zangerl, R., Richardson, E.S., 1963. The paleoecological history of two Pennsylvanian black shales. Chicago Natural History Museum, Chicago.			dif	missed	Perry County, Illinois	USA	-	Linton	Anna Shale	laminated organic-rich black shale; pyrite <1%
RMC JB	Anna Shale, USA	310	302.739	17.2255	443.809	44.3344	384.309	25.6329	682.198	84.7882	310	12.4663	2.62476	12.8108				13.7738	175.915	28.542	20.4614	1.56587	Early Chesterian (Late Mississippean) conodont assemblage, Dumoulin, J.A., Slack, J.F., Whalen, M.T., Harris, A.G., 2011. Depositional setting and geochemistry of phospho- rites and metalliferous black shales in the Carboniferous-Permian Lisburne Group, northern Alaska, in: Dumoulin, J.A., Galloway, J.P. (Eds.), Studies by the U.S. Geological Survey in Alaska, 2008–2009: U.S. Geological Survey Pr…				K2-	Monotis Creek, Brooks Range, Northern Alaska	USA	Lisburne	Siksikpuk	-	metalliferous black shales
RMC JB	Anna Shale, USA	310	467.697	48.2968	1595.71	538.179	605.427	36.2113	779.643	295.162	310	24.7096	7.39271	30.0801	0.706836			9.21016	83.9018	62.3115	64.9697	1.59803	Upper Carboniferous (Upper Pennsylvanian) fossil assemblages, Zangerl, R., Richardson, E.S., 1963. The paleoecological history of two Pennsylvanian black shales. Chicago Natural History Museum, Chicago.			dif	missed	Perry County, Illinois	USA	-	Linton	Anna Shale	laminated organic-rich black shale; pyrite <1%
RMC JB	Anna Shale, USA	310	443.71	92.3002	3036.4	721.567	2979.51	66.4188	856.37	526.187	310	22.1536	31.2092	57.6395	0.749294			7.69944	82.7621	48.006	46.1557	1.70893	Early Chesterian (Late Mississippean) conodont assemblage, Dumoulin, J.A., Slack, J.F., Whalen, M.T., Harris, A.G., 2011. Depositional setting and geochemistry of phospho- rites and metalliferous black shales in the Carboniferous-Permian Lisburne Group, northern Alaska, in: Dumoulin, J.A., Galloway, J.P. (Eds.), Studies by the U.S. Geological Survey in Alaska, 2008–2009: U.S. Geological Survey Pr…				K2-	Monotis Creek, Brooks Range, Northern Alaska	USA	Lisburne	Siksikpuk	-	metalliferous black shales
RMC JB	Anna Shale, USA	310	579.484	66.456	1973.27	723.611	1909.45	68.093	901.123	350.756	310	33.9022	18.7685	50.7651	0.948468		0.0923372	11.6036	162.025	106.136	105.861	2.5394	Upper Carboniferous (Upper Pennsylvanian) fossil assemblages, Zangerl, R., Richardson, E.S., 1963. The paleoecological history of two Pennsylvanian black shales. Chicago Natural History Museum, Chicago.			dif	missed	Perry County, Illinois	USA	-	Linton	Anna Shale	laminated organic-rich black shale; pyrite <1%
RMC JB	Anna Shale, USA	310	621.249	81.0669	2395.24	930.356	550.376	60.1717	971.426	412.595	310	33.9294	2.96634	32.4829	1.06066			10.6343	119.266	82.377	82.3734	3.02439	Early Chesterian (Late Mississippean) conodont assemblage, Dumoulin, J.A., Slack, J.F., Whalen, M.T., Harris, A.G., 2011. Depositional setting and geochemistry of phospho- rites and metalliferous black shales in the Carboniferous-Permian Lisburne Group, northern Alaska, in: Dumoulin, J.A., Galloway, J.P. (Eds.), Studies by the U.S. Geological Survey in Alaska, 2008–2009: U.S. Geological Survey Pr…				K2-	Ivotuk Hills, Brooks Range, Northern Alaska	USA	Lisburne	Siksikpuk	-	metalliferous black shales
RMC JB	Anna Shale, USA	310	709.451	66.1461	1920.38	572.177	1532.13	59.7083	1044.8	326.751	310	36.5437	10.5368	51.2077	1.0308			12.7214	103.995	57.251	56.1276	1.53458	Early Chesterian (Late Mississippean) conodont assemblage, Dumoulin, J.A., Slack, J.F., Whalen, M.T., Harris, A.G., 2011. Depositional setting and geochemistry of phospho- rites and metalliferous black shales in the Carboniferous-Permian Lisburne Group, northern Alaska, in: Dumoulin, J.A., Galloway, J.P. (Eds.), Studies by the U.S. Geological Survey in Alaska, 2008–2009: U.S. Geological Survey Pr…				K2-	Ivotuk Hills, Brooks Range, Northern Alaska	USA	Lisburne	Siksikpuk	-	metalliferous black shales
RMC JB	Anna Shale, USA	310	442.003	70.1708	2653.58	873.467	1663.46	69.8966	1058.04	434.14	310	32.6137	11.0226	54.5168	1.61668		0.066623	12.2029	115.05	79.2405	76.4761	2.47501	Early Chesterian (Late Mississippean) conodont assemblage, Dumoulin, J.A., Slack, J.F., Whalen, M.T., Harris, A.G., 2011. Depositional setting and geochemistry of phospho- rites and metalliferous black shales in the Carboniferous-Permian Lisburne Group, northern Alaska, in: Dumoulin, J.A., Galloway, J.P. (Eds.), Studies by the U.S. Geological Survey in Alaska, 2008–2009: U.S. Geological Survey Pr…				K2-	Ivotuk Hills, Brooks Range, Northern Alaska	USA	Lisburne	Siksikpuk	-	metalliferous black shales
RMC JB	Anna Shale, USA	310	583.446	82.3559	2839.51	1014.63	935.342	83.5996	1064.68	419.412	310	43.7025	5.25041	42.0245	1.63693		0.0749144	15.2109	130.867	95.8476	90.5098	4.14627	Early Chesterian (Late Mississippean) conodont assemblage, Dumoulin, J.A., Slack, J.F., Whalen, M.T., Harris, A.G., 2011. Depositional setting and geochemistry of phospho- rites and metalliferous black shales in the Carboniferous-Permian Lisburne Group, northern Alaska, in: Dumoulin, J.A., Galloway, J.P. (Eds.), Studies by the U.S. Geological Survey in Alaska, 2008–2009: U.S. Geological Survey Pr…				K2-	Ivotuk Hills, Brooks Range, Northern Alaska	USA	Lisburne	Siksikpuk	-	metalliferous black shales
RMC JB	Anna Shale, USA	310	1003.08	53.8357	1587.57	516.576	974.365	49.4609	1087.92	224.625	310	38.8078	6.98866	44.5688			0.0661772	11.3377	91.6981	63.133	59.2287	1.84377	Early Chesterian (Late Mississippean) conodont assemblage, Dumoulin, J.A., Slack, J.F., Whalen, M.T., Harris, A.G., 2011. Depositional setting and geochemistry of phospho- rites and metalliferous black shales in the Carboniferous-Permian Lisburne Group, northern Alaska, in: Dumoulin, J.A., Galloway, J.P. (Eds.), Studies by the U.S. Geological Survey in Alaska, 2008–2009: U.S. Geological Survey Pr…				K2-	Ivotuk Hills, Brooks Range, Northern Alaska	USA	Lisburne	Siksikpuk	-	metalliferous black shales
RMC JB	Anna Shale, USA	310	251.962	20.3283	700.201	138.124	233.718	22.3014	1272.8	128.669	310	15.2116	2.49179	12.7738				53.3169	180.742	26.8918	18.9471	0.920421	Early Chesterian (Late Mississippean) conodont assemblage, Dumoulin, J.A., Slack, J.F., Whalen, M.T., Harris, A.G., 2011. Depositional setting and geochemistry of phospho- rites and metalliferous black shales in the Carboniferous-Permian Lisburne Group, northern Alaska, in: Dumoulin, J.A., Galloway, J.P. (Eds.), Studies by the U.S. Geological Survey in Alaska, 2008–2009: U.S. Geological Survey Pr…				K2-	Ivotuk Hills, Brooks Range, Northern Alaska	USA	Lisburne	Siksikpuk	-	metalliferous black shales
RMC JB	Anna Shale, USA	310	809.725	60.7519	1973.41	735.29	1300.68	89.5074	1591.4	312.202	310	47.8762	12.5117	58.4046			0.0982263	45.6809	151.734	87.2263	83.6009	2.30058	Early Chesterian (Late Mississippean) conodont assemblage, Dumoulin, J.A., Slack, J.F., Whalen, M.T., Harris, A.G., 2011. Depositional setting and geochemistry of phospho- rites and metalliferous black shales in the Carboniferous-Permian Lisburne Group, northern Alaska, in: Dumoulin, J.A., Galloway, J.P. (Eds.), Studies by the U.S. Geological Survey in Alaska, 2008–2009: U.S. Geological Survey Pr…				K2-	Ivotuk Hills, Brooks Range, Northern Alaska	USA	Lisburne	Siksikpuk	-	metalliferous black shales
RMC JB	Anna Shale, USA	310	541.686	72.1619	3098.19	1211.52	1539.79	63.8118	1708.27	382.392	310	55.4209	35.0789	76.0971				15.9218	177.044	126.663	131.054	4.29951	Early Chesterian (Late Mississippean) conodont assemblage, Dumoulin, J.A., Slack, J.F., Whalen, M.T., Harris, A.G., 2011. Depositional setting and geochemistry of phospho- rites and metalliferous black shales in the Carboniferous-Permian Lisburne Group, northern Alaska, in: Dumoulin, J.A., Galloway, J.P. (Eds.), Studies by the U.S. Geological Survey in Alaska, 2008–2009: U.S. Geological Survey Pr…				K2-	Ivotuk Hills, Brooks Range, Northern Alaska	USA	Lisburne	Siksikpuk	-	metalliferous black shales
RMC JB	Anna Shale, USA	310	577.764	81.8722	2977.51	1132.9	681.333	80.9449	1751.3	345.733	310	67.4512	5.81812	67.7412	1.6752		0.0733209	16.7474	174.654	126.972	115.804	3.96494	Early Chesterian (Late Mississippean) conodont assemblage, Dumoulin, J.A., Slack, J.F., Whalen, M.T., Harris, A.G., 2011. Depositional setting and geochemistry of phospho- rites and metalliferous black shales in the Carboniferous-Permian Lisburne Group, northern Alaska, in: Dumoulin, J.A., Galloway, J.P. (Eds.), Studies by the U.S. Geological Survey in Alaska, 2008–2009: U.S. Geological Survey Pr…				K2-	Ivotuk Hills, Brooks Range, Northern Alaska	USA	Lisburne	Siksikpuk	-	metalliferous black shales
RMC JB	Anna Shale, USA	310	100.832	8.56798	302.011	476.363	77.0358	1867.14	2784.86	86.5168	310	47.1475	2.46362	296.58	0.184649		0.00767921	9.05841	227.406	128.27	126.463	0.186956	Early Chesterian (Late Mississippean) conodont assemblage, Dumoulin, J.A., Slack, J.F., Whalen, M.T., Harris, A.G., 2011. Depositional setting and geochemistry of phospho- rites and metalliferous black shales in the Carboniferous-Permian Lisburne Group, northern Alaska, in: Dumoulin, J.A., Galloway, J.P. (Eds.), Studies by the U.S. Geological Survey in Alaska, 2008–2009: U.S. Geological Survey Pr…				K2-	Monotis Creek, Brooks Range, Northern Alaska	USA	Lisburne	Siksikpuk	-	metalliferous black shales
RMC JB	Anna Shale, USA	310	139.529	13.9169	435.945	493.154	128.955	333.971	2886.63	307.409	310	69.8528	6.70331	170.388			0.0190048	47.4424	632.2	193.355	176.607	0.105564	Early Chesterian (Late Mississippean) conodont assemblage, Dumoulin, J.A., Slack, J.F., Whalen, M.T., Harris, A.G., 2011. Depositional setting and geochemistry of phospho- rites and metalliferous black shales in the Carboniferous-Permian Lisburne Group, northern Alaska, in: Dumoulin, J.A., Galloway, J.P. (Eds.), Studies by the U.S. Geological Survey in Alaska, 2008–2009: U.S. Geological Survey Pr…				K2-	Ivotuk Hills, Brooks Range, Northern Alaska	USA	Lisburne	Siksikpuk	-	metalliferous black shales
RMC JB	Anna Shale, USA	310	768.027	79.8141	2961.14	1131.74	1798.95	92.6948	2980.21	376.467	310	60.9946	12.2879	90.1385	1.62502		0.0931877	39.9736	218.15	134.604	135.8	4.13784	Early Chesterian (Late Mississippean) conodont assemblage, Dumoulin, J.A., Slack, J.F., Whalen, M.T., Harris, A.G., 2011. Depositional setting and geochemistry of phospho- rites and metalliferous black shales in the Carboniferous-Permian Lisburne Group, northern Alaska, in: Dumoulin, J.A., Galloway, J.P. (Eds.), Studies by the U.S. Geological Survey in Alaska, 2008–2009: U.S. Geological Survey Pr…				K2-	Ivotuk Hills, Brooks Range, Northern Alaska	USA	Lisburne	Siksikpuk	-	metalliferous black shales
RMC JB	Anna Shale, USA	310	0.258729	5.46422	220.393	552.844	6.01673	2546.03	3637.11	98.7312	310	53.3769	2.47438	358.464			0.0112037	10.2809	223.878	145.753	144.706	0.0599299	Early Chesterian (Late Mississippean) conodont assemblage, Dumoulin, J.A., Slack, J.F., Whalen, M.T., Harris, A.G., 2011. Depositional setting and geochemistry of phospho- rites and metalliferous black shales in the Carboniferous-Permian Lisburne Group, northern Alaska, in: Dumoulin, J.A., Galloway, J.P. (Eds.), Studies by the U.S. Geological Survey in Alaska, 2008–2009: U.S. Geological Survey Pr…				K2-	Monotis Creek, Brooks Range, Northern Alaska	USA	Lisburne	Siksikpuk	-	metalliferous black shales
RMC JB	Anna Shale, USA	310	17.9824	5.79206	203.602	471.644	63.6593	2289.11	3914.71	110.605	310	41.5297	3.71423	394.018				15.349	143.557	101.329	102.575	0.0755501	Early Chesterian (Late Mississippean) conodont assemblage, Dumoulin, J.A., Slack, J.F., Whalen, M.T., Harris, A.G., 2011. Depositional setting and geochemistry of phospho- rites and metalliferous black shales in the Carboniferous-Permian Lisburne Group, northern Alaska, in: Dumoulin, J.A., Galloway, J.P. (Eds.), Studies by the U.S. Geological Survey in Alaska, 2008–2009: U.S. Geological Survey Pr…				K2-	Monotis Creek, Brooks Range, Northern Alaska	USA	Lisburne	Siksikpuk	-	metalliferous black shales
RMC JB	Anna Shale, USA	310	100.171	7.43902	301.23	484.227	71.7868	1435.41	4749.6	258.656	310	37.5604	2.94055	293.333			0.0120089	24.7819	134.838	70.2803	69.9059	0.029125
RMC JB	Anna Shale, USA	310	101.144	8.63148	357.747	480.407	62.6286	1594.73	4942.93	102.665	310	36.2527	2.98809	301.86	0.0572004		0.00790686	27.8378	130.392	70.9584	67.7977	0.0436563	Early Chesterian (Late Mississippean) conodont assemblage, Dumoulin, J.A., Slack, J.F., Whalen, M.T., Harris, A.G., 2011. Depositional setting and geochemistry of phospho- rites and metalliferous black shales in the Carboniferous-Permian Lisburne Group, northern Alaska, in: Dumoulin, J.A., Galloway, J.P. (Eds.), Studies by the U.S. Geological Survey in Alaska, 2008–2009: U.S. Geological Survey Pr…				K2-	Monotis Creek, Brooks Range, Northern Alaska	USA	Lisburne	Siksikpuk	-	metalliferous black shales
RMC JB	Anna Shale, USA	310	67.2446	9.43522	340.715	650.052	43.0334	2154.55	4948.22	96.8982	310	78.2597	2.65267	419.188	0.0889027		0.0137773	21.52	198.542	126.77	121.605	0.296936	Early Chesterian (Late Mississippean) conodont assemblage, Dumoulin, J.A., Slack, J.F., Whalen, M.T., Harris, A.G., 2011. Depositional setting and geochemistry of phospho- rites and metalliferous black shales in the Carboniferous-Permian Lisburne Group, northern Alaska, in: Dumoulin, J.A., Galloway, J.P. (Eds.), Studies by the U.S. Geological Survey in Alaska, 2008–2009: U.S. Geological Survey Pr…				K2-	Monotis Creek, Brooks Range, Northern Alaska	USA	Lisburne	Siksikpuk	-	metalliferous black shales
05AD6E	Lisburne Fm. USA	328	1077.86	8.10198	1353.62	881.638	4422.57	1251.85	2118.31	209.291	328	2188.79	366.726	341.966	0.604	0.0605	0.0415	54.4162	389.549	290.612	305.088	3.38081	Early Chesterian (Late Mississippean) conodont assemblage, Dumoulin, J.A., Slack, J.F., Whalen, M.T., Harris, A.G., 2011. Depositional setting and geochemistry of phospho- rites and metalliferous black shales in the Carboniferous-Permian Lisburne Group, northern Alaska, in: Dumoulin, J.A., Galloway, J.P. (Eds.), Studies by the U.S. Geological Survey in Alaska, 2008–2009: U.S. Geological Survey Pr…				K2-	Ivotuk Hills, Brooks Range, Northern Alaska	USA	Lisburne	Siksikpuk	-	metalliferous black shales
05AD6E	Lisburne Fm. USA	328	1047.51	4.96884	964.129	1280.87	7436.12	962.967	2573.49	495.736	328	2256.07	742.93	308.022	1.59605	0.0605	0.0425	43.3775	317.439	249.266	262.031	4.16836	Early Chesterian (Late Mississippean) conodont assemblage, Dumoulin, J.A., Slack, J.F., Whalen, M.T., Harris, A.G., 2011. Depositional setting and geochemistry of phospho- rites and metalliferous black shales in the Carboniferous-Permian Lisburne Group, northern Alaska, in: Dumoulin, J.A., Galloway, J.P. (Eds.), Studies by the U.S. Geological Survey in Alaska, 2008–2009: U.S. Geological Survey Pr…				K2-	Ivotuk Hills, Brooks Range, Northern Alaska	USA	Lisburne	Siksikpuk	-	metalliferous black shales
05AD6E	Lisburne Fm. USA	328	3010.49	2.00536	600.684	993.503	5606.65	475.185	2714.68	694.326	328	1751.47	471.755	222.019	0.472608	0.0605	0.204342	27.4982	273.819	206.386	222.554	1.41925
05AD6E	Lisburne Fm. USA	328	2416.18	2.37047	852.41	704.673	5763.82	353.483	3073.93	516.254	328	1340.24	390.493	195.727	1.38047	0.0605	0.178285	20.6032	268.709	215.549	215.998	2.03883	Upper Brigantian (Visean) fossil assemblages, Waters, C., Browne, M., Jones, N., Somerville, I., 2011. Midland Valley of Scotland, in: Waters, C. (Ed.), A Revised Correlation of the Carboniferous Rocks in the British Isles: Geological Society Special Report 26. Geological Society of London, pp. 96-102.				I5-	Skelpie Quarry, Cults, Fife	Scotland	Clackmannan	Lower Limestone	Hurlet Limestone	fissile pyritic black shale; 2-5 % pyrite
05AD6E	Lisburne Fm. USA	328	2570.2	1.0633	527.286	1660.44	7017.24	463.73	3256.41	554.177	328	1681.88	862.535	177.096	0.603	0.0605	0.189769	23.871	274.919	210.964	222.349	3.1366	Early Chesterian (Late Mississippean) conodont assemblage, Dumoulin, J.A., Slack, J.F., Whalen, M.T., Harris, A.G., 2011. Depositional setting and geochemistry of phospho- rites and metalliferous black shales in the Carboniferous-Permian Lisburne Group, northern Alaska, in: Dumoulin, J.A., Galloway, J.P. (Eds.), Studies by the U.S. Geological Survey in Alaska, 2008–2009: U.S. Geological Survey Pr…				K2-	Ivotuk Hills, Brooks Range, Northern Alaska	USA	Lisburne	Siksikpuk	-	metalliferous black shales
05AD6E	Lisburne Fm. USA	328	2289	1.81732	921.882	1593.72	8601.7	429.622	3272.25	579.377	328	1477.91	826.182	221.184	0.5885	0.0605	0.218841	20.131	268.702	189.232	206.792	0.999055	Early Chesterian (Late Mississippean) conodont assemblage, Dumoulin, J.A., Slack, J.F., Whalen, M.T., Harris, A.G., 2011. Depositional setting and geochemistry of phospho- rites and metalliferous black shales in the Carboniferous-Permian Lisburne Group, northern Alaska, in: Dumoulin, J.A., Galloway, J.P. (Eds.), Studies by the U.S. Geological Survey in Alaska, 2008–2009: U.S. Geological Survey Pr…				K2-	Ivotuk Hills, Brooks Range, Northern Alaska	USA	Lisburne	Siksikpuk	-	metalliferous black shales
05AD6E	Lisburne Fm. USA	328	2651.38	1.42209	849.56	646.422	3356.43	431.625	3433.23	280.937	328	1513.34	243.033	215.631	1.17019	0.0605	0.252472	25.7292	259.545	191.066	199.127	4.54211	Upper Brigantian (Visean) fossil assemblages, Waters, C., Browne, M., Jones, N., Somerville, I., 2011. Midland Valley of Scotland, in: Waters, C. (Ed.), A Revised Correlation of the Carboniferous Rocks in the British Isles: Geological Society Special Report 26. Geological Society of London, pp. 96-102.				I5-	Skelpie Quarry, Cults, Fife	Scotland	Clackmannan	Lower Limestone	Hurlet Limestone	fissile pyritic black shale; 2-5 % pyrite
JS0582C	Lisburne Fm. USA	328	91.9875	10.6515	648.189	388.86	1992.97	567.772	1087.9	103.361	328	31.4767	143.879	42.7004	2.4235	0.1565	0.1125	2.55313	44.1557	36.5408	37.2198	2.258	Middle Brigantian (Visean) fossil assemblages, Waters, C., Browne, M., Jones, N., Somerville, I., 2011. Midland Valley of Scotland, in: Waters, C. (Ed.), A Revised Correlation of the Carboniferous Rocks in the British Isles: Geological Society Special Report 26. Geological Society of London, pp. 96-102.				K1-	Pathhead Fife	Scotland	Strathclyde	Pathhead	Upper Adrossan Limestone/ Shale band 1	black shale finely laminated
JS0582C	Lisburne Fm. USA	328	50.1189	3.90223	913.589	355.025	3816.24	947.71	1220.59	274.994	328	44.8689	303.119	48.7327	2.8145	0.1565	0.1305	2.21354	56.3883	39.3644	40.3369	3.48634	Upper Brigantian (Visean) fossil assemblages, Waters, C., Browne, M., Jones, N., Somerville, I., 2011. Midland Valley of Scotland, in: Waters, C. (Ed.), A Revised Correlation of the Carboniferous Rocks in the British Isles: Geological Society Special Report 26. Geological Society of London, pp. 96-102.				I5-	Skelpie Quarry, Cults, Fife	Scotland	Clackmannan	Lower Limestone	Hurlet Limestone	fissile pyritic black shale; 2-5 % pyrite
JS0582C	Lisburne Fm. USA	328	3082.48	25.3595	5491.45	7642.12	2750.92	1858.18	1529.3	341.492	328	1252.3	276.195	489.82	10.3572	0.1565	0.270259	49.3278	677.551	557.888	596.044	14.4925
JS0582C	Lisburne Fm. USA	328	18.2133	3.59788	519.536	180.23	1786.03	1202.32	1711.54	86.1778	328	10.5913	139.164	20.2124	2.2305	0.1565	0.1035	0.968024	19.3587	12.3623	14.5624	5.20557	Upper Brigantian (Visean) fossil assemblages, Waters, C., Browne, M., Jones, N., Somerville, I., 2011. Midland Valley of Scotland, in: Waters, C. (Ed.), A Revised Correlation of the Carboniferous Rocks in the British Isles: Geological Society Special Report 26. Geological Society of London, pp. 96-102.				I5-	Skelpie Quarry, Cults, Fife	Scotland	Clackmannan	Lower Limestone	Hurlet Limestone	fissile pyritic black shale; 2-5 % pyrite
JS0582C	Lisburne Fm. USA	328	678.535	15.2477	1859.12	2170.66	8141.46	686.112	1746.33	447.57	328	458.108	982.762	148.394	2.622	0.1565	0.122	15.7837	285.44	211.011	231.445	7.61173	Upper Brigantian (Visean) fossil assemblages, Waters, C., Browne, M., Jones, N., Somerville, I., 2011. Midland Valley of Scotland, in: Waters, C. (Ed.), A Revised Correlation of the Carboniferous Rocks in the British Isles: Geological Society Special Report 26. Geological Society of London, pp. 96-102.				I5-	Skelpie Quarry, Cults, Fife	Scotland	Clackmannan	Lower Limestone	Hurlet Limestone	fissile pyritic black shale; 2-5 % pyrite
JS0582C	Lisburne Fm. USA	328	1758.79	12.6204	2173.1	3765.5	3637.44	1093.65	1832.28	310.766	328	759.335	347.899	297.185	8.47939	0.1565	0.174569	27.4136	279.517	224.58	233.558	4.17812	Upper Brigantian (Visean) fossil assemblages, Waters, C., Browne, M., Jones, N., Somerville, I., 2011. Midland Valley of Scotland, in: Waters, C. (Ed.), A Revised Correlation of the Carboniferous Rocks in the British Isles: Geological Society Special Report 26. Geological Society of London, pp. 96-102.				I5-	Skelpie Quarry, Cults, Fife	Scotland	Clackmannan	Lower Limestone	Hurlet Limestone	fissile pyritic black shale; 2-5 % pyrite
JS0582C	Lisburne Fm. USA	328	16.3725	7.3283	635.518	97.957	2398.15	627.431	1899.51	280.226	328	61.0118	132.81	56.1683	3.6245	0.1565	0.1305	3.48228	64.7496	39.8281	49.1389	6.75361	Upper Brigantian (Visean) fossil assemblages, Waters, C., Browne, M., Jones, N., Somerville, I., 2011. Midland Valley of Scotland, in: Waters, C. (Ed.), A Revised Correlation of the Carboniferous Rocks in the British Isles: Geological Society Special Report 26. Geological Society of London, pp. 96-102.				I5-	Skelpie Quarry, Cults, Fife	Scotland	Clackmannan	Lower Limestone	Hurlet Limestone	fissile pyritic black shale; 2-5 % pyrite
JS0582C	Lisburne Fm. USA	328	44.7642	9.6513	611.905	350.42	200.973	360.129	2097.34	73.8284	328	60.9089	44.9544	53.7792	1.789	0.1565	0.083	6.20144	56.7159	39.287	44.5547	0.686883	Upper Brigantian (Visean) fossil assemblages, Waters, C., Browne, M., Jones, N., Somerville, I., 2011. Midland Valley of Scotland, in: Waters, C. (Ed.), A Revised Correlation of the Carboniferous Rocks in the British Isles: Geological Society Special Report 26. Geological Society of London, pp. 96-102.				I5-	Skelpie Quarry, Cults, Fife	Scotland	Clackmannan	Lower Limestone	Hurlet Limestone	fissile pyritic black shale; 2-5 % pyrite
JS0582C	Lisburne Fm. USA	328	3299.1	19.7602	3434.22	4601.01	1500.85	1848.55	2382.76	282.106	328	1196.33	157.626	458.402	17.5532	0.1565	0.394198	50.9053	457.803	356.156	382.513	9.40186	Upper Brigantian (Visean) fossil assemblages, Waters, C., Browne, M., Jones, N., Somerville, I., 2011. Midland Valley of Scotland, in: Waters, C. (Ed.), A Revised Correlation of the Carboniferous Rocks in the British Isles: Geological Society Special Report 26. Geological Society of London, pp. 96-102.				I5-	Skelpie Quarry, Cults, Fife	Scotland	Clackmannan	Lower Limestone	Hurlet Limestone	fissile pyritic black shale; 2-5 % pyrite
JS0582C	Lisburne Fm. USA	328	4544.8	12.047	3886.1	5962.24	9626.65	2372	2532.6	663.031	328	1721.53	758.875	491.329	19.1883	0.1565	0.49781	59.6794	636.592	517.317	561.248	18.3597	Upper Brigantian (Visean) fossil assemblages, Waters, C., Browne, M., Jones, N., Somerville, I., 2011. Midland Valley of Scotland, in: Waters, C. (Ed.), A Revised Correlation of the Carboniferous Rocks in the British Isles: Geological Society Special Report 26. Geological Society of London, pp. 96-102.				I5-	Skelpie Quarry, Cults, Fife	Scotland	Clackmannan	Lower Limestone	Hurlet Limestone	fissile pyritic black shale; 2-5 % pyrite
JS0582C	Lisburne Fm. USA	328	58.3401	3.03975	497.284	563.423	1534.38	295.535	2994.45	130.201	328	69.8999	121.661	63.5261	2.142	0.1565	0.0995	4.66818	80.9189	53.0982	61.6371	0.952876	Middle Brigantian (Visean) fossil assemblages, Waters, C., Browne, M., Jones, N., Somerville, I., 2011. Midland Valley of Scotland, in: Waters, C. (Ed.), A Revised Correlation of the Carboniferous Rocks in the British Isles: Geological Society Special Report 26. Geological Society of London, pp. 96-102.				K1-	Pathhead Fife	Scotland	Strathclyde	Pathhead	Upper Adrossan Limestone/ Shale band 1	black shale finely laminated
JS0582C	Lisburne Fm. USA	328	3618.5	9.29183	2552.56	5537.48	9605.71	1995.96	3047.97	997.201	328	1608.5	780.373	554.846	21.7626	0.1565	0.382768	60.7959	714.879	563.586	602.918	13.9442	Middle Brigantian (Visean) fossil assemblages, Waters, C., Browne, M., Jones, N., Somerville, I., 2011. Midland Valley of Scotland, in: Waters, C. (Ed.), A Revised Correlation of the Carboniferous Rocks in the British Isles: Geological Society Special Report 26. Geological Society of London, pp. 96-102.				K1-	Pathhead Fife	Scotland	Strathclyde	Pathhead	Upper Adrossan Limestone/ Shale band 1	black shale finely laminated
JS0582C	Lisburne Fm. USA	328	3841.67	34.5476	8253.29	9134.55	3179.95	2391.9	3233.89	551.203	328	2004.09	368.591	582.86	20.3229	0.1565	0.691985	89.4858	839.995	650.924	701.747	15.4144	Middle Brigantian (Visean) fossil assemblages, Waters, C., Browne, M., Jones, N., Somerville, I., 2011. Midland Valley of Scotland, in: Waters, C. (Ed.), A Revised Correlation of the Carboniferous Rocks in the British Isles: Geological Society Special Report 26. Geological Society of London, pp. 96-102.				K1-	Pathhead Fife	Scotland	Strathclyde	Pathhead	Upper Adrossan Limestone/ Shale band 1	black shale finely laminated
JS0582C	Lisburne Fm. USA	328	5675.47	21.9874	5371.88	7467.04	2011.21	2711.63	3361.06	455.94	328	1817.58	240.826	563.686	19.8848	0.1565	0.660965	78.9482	729.132	581.139	621.503	15.1955	Upper Brigantian (Visean) fossil assemblages, Waters, C., Browne, M., Jones, N., Somerville, I., 2011. Midland Valley of Scotland, in: Waters, C. (Ed.), A Revised Correlation of the Carboniferous Rocks in the British Isles: Geological Society Special Report 26. Geological Society of London, pp. 96-102.				I5-	Skelpie Quarry, Cults, Fife	Scotland	Clackmannan	Lower Limestone	Hurlet Limestone	fissile pyritic black shale; 2-5 % pyrite
JS0582C	Lisburne Fm. USA	328	216.596	7.01821	868.195	953.491	3270.28	527.84	4702.54	341.912	328	143.98	365.664	69.075	3.83673	0.1565	0.0755	9.23228	95.0591	74.4908	77.8876	2.27036	Middle Brigantian (Visean) fossil assemblages, Waters, C., Browne, M., Jones, N., Somerville, I., 2011. Midland Valley of Scotland, in: Waters, C. (Ed.), A Revised Correlation of the Carboniferous Rocks in the British Isles: Geological Society Special Report 26. Geological Society of London, pp. 96-102.				K1-	Pathhead Fife	Scotland	Strathclyde	Pathhead	Upper Adrossan Limestone/ Shale band 1	black shale finely laminated
SCOT2	Fife, Scotland	331	936.127	20.663	131.154	9.29448	9.0206	11.8616	3.9164	5.39008	331	0.0907998	0.296433	0.303301	0.1495	0.0205	0.0075	0.780355	117.439	105.713	111.115	0.0095	Middle Brigantian (Visean) fossil assemblages, Waters, C., Browne, M., Jones, N., Somerville, I., 2011. Midland Valley of Scotland, in: Waters, C. (Ed.), A Revised Correlation of the Carboniferous Rocks in the British Isles: Geological Society Special Report 26. Geological Society of London, pp. 96-102.				K1-	Pathhead Fife	Scotland	Strathclyde	Pathhead	Upper Adrossan Limestone/ Shale band 1	black shale finely laminated
SCOT2	Fife, Scotland	331	478.167	38.1377	160.245	5.59873	3.82704	85.6874	6.27887	19.3349	331	0.0733772	0.1105	0.689701	0.2185	0.0205	0.0085	0.746177	133.266	120.699	124.626	0.0105	Middle Brigantian (Visean) fossil assemblages, Waters, C., Browne, M., Jones, N., Somerville, I., 2011. Midland Valley of Scotland, in: Waters, C. (Ed.), A Revised Correlation of the Carboniferous Rocks in the British Isles: Geological Society Special Report 26. Geological Society of London, pp. 96-102.				K1-	Pathhead Fife	Scotland	Strathclyde	Pathhead	Upper Adrossan Limestone/ Shale band 1	black shale finely laminated
SCOT2	Fife, Scotland	331	806.024	37.4123	202.208	8.54337	2.7252	104.358	9.5263	17.7808	331	0.0205	0.480271	0.913465	0.218	0.0205	0.0085	1.04571	251.068	222.812	235.781	0.0105	Middle Brigantian (Visean) fossil assemblages, Waters, C., Browne, M., Jones, N., Somerville, I., 2011. Midland Valley of Scotland, in: Waters, C. (Ed.), A Revised Correlation of the Carboniferous Rocks in the British Isles: Geological Society Special Report 26. Geological Society of London, pp. 96-102.				K1-	Pathhead Fife	Scotland	Strathclyde	Pathhead	Upper Adrossan Limestone/ Shale band 1	black shale finely laminated
SCOT2	Fife, Scotland	331	4709.08	79.5383	383.159	15.8605	22.8492	131.388	12.8417	32.8465	331	0.163644	1.12033	1.64311	0.2465	0.0205	0.0095	1.61763	410.269	365.151	387.512	0.0374086	Middle Brigantian (Visean) fossil assemblages, Waters, C., Browne, M., Jones, N., Somerville, I., 2011. Midland Valley of Scotland, in: Waters, C. (Ed.), A Revised Correlation of the Carboniferous Rocks in the British Isles: Geological Society Special Report 26. Geological Society of London, pp. 96-102.				K1-	Pathhead Fife	Scotland	Strathclyde	Pathhead	Upper Adrossan Limestone/ Shale band 1	black shale finely laminated
SCOT2	Fife, Scotland	331	1407.14	62.7753	311.587	13.1108	5.28251	156.142	13.1329	29.575	331	0.104126	0.735481	1.65075	0.145	0.0205	0.007	1.53612	369.054	334.69	354.526	0.009	Middle Brigantian (Visean) fossil assemblages, Waters, C., Browne, M., Jones, N., Somerville, I., 2011. Midland Valley of Scotland, in: Waters, C. (Ed.), A Revised Correlation of the Carboniferous Rocks in the British Isles: Geological Society Special Report 26. Geological Society of London, pp. 96-102.				K1-	Pathhead Fife	Scotland	Strathclyde	Pathhead	Upper Adrossan Limestone/ Shale band 1	black shale finely laminated
SCOT2	Fife, Scotland	331	1251.41	46.0999	233.859	26.1941	18.8854	172.724	14.5416	29.198	331	0.115905	0.669921	1.55754	0.224	0.0205	0.011	2.66695	176.545	157.022	169.304	0.119128	Middle Brigantian (Visean) fossil assemblages, Waters, C., Browne, M., Jones, N., Somerville, I., 2011. Midland Valley of Scotland, in: Waters, C. (Ed.), A Revised Correlation of the Carboniferous Rocks in the British Isles: Geological Society Special Report 26. Geological Society of London, pp. 96-102.				K1-	Pathhead Fife	Scotland	Strathclyde	Pathhead	Upper Adrossan Limestone/ Shale band 1	black shale finely laminated
SCOT2	Fife, Scotland	331	360.614	119.157	592.956	22.7938	7.6538	127.693	16.7378	61.2558	331	0.285997	1.98447	2.54472	0.159	0.0205	0.008	2.18468	580.572	522.338	553.314	0.0426381	Middle Brigantian (Visean) fossil assemblages, Waters, C., Browne, M., Jones, N., Somerville, I., 2011. Midland Valley of Scotland, in: Waters, C. (Ed.), A Revised Correlation of the Carboniferous Rocks in the British Isles: Geological Society Special Report 26. Geological Society of London, pp. 96-102.				K1-	Pathhead Fife	Scotland	Strathclyde	Pathhead	Upper Adrossan Limestone/ Shale band 1	black shale finely laminated
SCOT2	Fife, Scotland	331	5718.27	22.6282	247.269	401.218	217.581	242.09	41.7358	541.448	331	3.34838	7.26308	29.1508	1.23467	0.0205	0.0085	7.9585	75.2294	67.4497	71.6728	0.396199	Middle Brigantian (Visean) fossil assemblages, Waters, C., Browne, M., Jones, N., Somerville, I., 2011. Midland Valley of Scotland, in: Waters, C. (Ed.), A Revised Correlation of the Carboniferous Rocks in the British Isles: Geological Society Special Report 26. Geological Society of London, pp. 96-102.				K1-	Pathhead Fife	Scotland	Strathclyde	Pathhead	Upper Adrossan Limestone/ Shale band 1	black shale finely laminated
SCOT2	Fife, Scotland	331	5537.65	38.0894	367.902	364.394	94.1019	542.516	51.1396	746.113	331	2.62197	6.59484	31.4283	0.975892	0.0205	0.0160711	4.53409	68.0377	61.3562	64.8914	0.375164	Middle Brigantian (Visean) fossil assemblages, Waters, C., Browne, M., Jones, N., Somerville, I., 2011. Midland Valley of Scotland, in: Waters, C. (Ed.), A Revised Correlation of the Carboniferous Rocks in the British Isles: Geological Society Special Report 26. Geological Society of London, pp. 96-102.				K1-	Pathhead Fife	Scotland	Strathclyde	Pathhead	Upper Adrossan Limestone/ Shale band 1	black shale finely laminated
SCOT2	Fife, Scotland	331	4.90119	34.3345	669.412	245.754	17.6812	263.556	54.2559	148.135	331	2.51909	0.755721	14.4984	0.2495	0.0205	0.01	30.7496	201.182	181.939	191.976	0.0248488	Middle Brigantian (Visean) fossil assemblages, Waters, C., Browne, M., Jones, N., Somerville, I., 2011. Midland Valley of Scotland, in: Waters, C. (Ed.), A Revised Correlation of the Carboniferous Rocks in the British Isles: Geological Society Special Report 26. Geological Society of London, pp. 96-102.				K1-	Pathhead Fife	Scotland	Strathclyde	Pathhead	Upper Adrossan Limestone/ Shale band 1	black shale finely laminated
SCOT2	Fife, Scotland	331	4.5386	27.7532	658.301	277.615	9.42806	303.251	59.2394	115.756	331	2.53018	0.915596	17.302	0.2425	0.0205	0.0095	31.5753	205.404	184.65	195.074	0.012	Middle Brigantian (Visean) fossil assemblages, Waters, C., Browne, M., Jones, N., Somerville, I., 2011. Midland Valley of Scotland, in: Waters, C. (Ed.), A Revised Correlation of the Carboniferous Rocks in the British Isles: Geological Society Special Report 26. Geological Society of London, pp. 96-102.				K1-	Pathhead Fife	Scotland	Strathclyde	Pathhead	Upper Adrossan Limestone/ Shale band 1	black shale finely laminated
53710210A	Pathhead Fm, Scotland	332	1191.81	25.5321	40.3937	43.1395	112.038	50.7447	2.5205	13.2882	332	0.562289	0.2825	3.33103	0.305	0.038	0.022	1.58047	157.904	139.497	144.196	0.290606	Middle Brigantian (Visean) fossil assemblages, Waters, C., Browne, M., Jones, N., Somerville, I., 2011. Midland Valley of Scotland, in: Waters, C. (Ed.), A Revised Correlation of the Carboniferous Rocks in the British Isles: Geological Society Special Report 26. Geological Society of London, pp. 96-102.				K1-	Pathhead Fife	Scotland	Strathclyde	Pathhead	Upper Adrossan Limestone/ Shale band 1	black shale finely laminated
53710210A	Pathhead Fm, Scotland	332	476.781	37.0585	335.902	41.193	80.5534	125.502	2.7315	2.53131	332	0.468336	0.3065	1.86631	0.3305	0.038	0.0235	14.2273	57.9905	55.4303	48.4975	0.52593	Middle Brigantian (Visean) fossil assemblages, Waters, C., Browne, M., Jones, N., Somerville, I., 2011. Midland Valley of Scotland, in: Waters, C. (Ed.), A Revised Correlation of the Carboniferous Rocks in the British Isles: Geological Society Special Report 26. Geological Society of London, pp. 96-102.				K1-	Pathhead Fife	Scotland	Strathclyde	Pathhead	Upper Adrossan Limestone/ Shale band 1	black shale finely laminated
53710210A	Pathhead Fm, Scotland	332	273.717	45.8167	188.908	39.635	96.2746	23.6937	2.96739	4.58255	332	0.638446	0.188574	1.8534	0.1255	0.038	0.009	3.04015	34.5707	30.6449	31.7054	0.290358	Middle Brigantian (Visean) fossil assemblages, Waters, C., Browne, M., Jones, N., Somerville, I., 2011. Midland Valley of Scotland, in: Waters, C. (Ed.), A Revised Correlation of the Carboniferous Rocks in the British Isles: Geological Society Special Report 26. Geological Society of London, pp. 96-102.				K1-	Pathhead Fife	Scotland	Strathclyde	Pathhead	Upper Adrossan Limestone/ Shale band 1	black shale finely laminated
53710210A	Pathhead Fm, Scotland	332	776.279	84.7679	487.31	79.5377	120.845	57.2286	6.88411	17.4811	332	2.28532	1.73865	4.73327	0.305	0.038	0.022	6.62604	62.9575	57.3845	58.8741	0.298729	Middle Brigantian (Visean) fossil assemblages, Waters, C., Browne, M., Jones, N., Somerville, I., 2011. Midland Valley of Scotland, in: Waters, C. (Ed.), A Revised Correlation of the Carboniferous Rocks in the British Isles: Geological Society Special Report 26. Geological Society of London, pp. 96-102.				K1-	Pathhead Fife	Scotland	Strathclyde	Pathhead	Upper Adrossan Limestone/ Shale band 1	black shale finely laminated
53710210A	Pathhead Fm, Scotland	332	2308.35	105.449	236.313	64.7966	155.094	83.1812	6.89036	20.858	332	0.731891	0.76044	5.75215	0.4095	0.038	0.0295	3.15712	142.775	137.832	141.977	0.836924	Middle Brigantian (Visean) fossil assemblages, Waters, C., Browne, M., Jones, N., Somerville, I., 2011. Midland Valley of Scotland, in: Waters, C. (Ed.), A Revised Correlation of the Carboniferous Rocks in the British Isles: Geological Society Special Report 26. Geological Society of London, pp. 96-102.				K1-	Pathhead Fife	Scotland	Strathclyde	Pathhead	Upper Adrossan Limestone/ Shale band 1	black shale finely laminated
53710210A	Pathhead Fm, Scotland	332	772.404	103.646	368.561	44.1784	127.882	78.796	7.45879	61.2579	332	0.265752	0.683918	5.91376	0.296	0.038	0.021	1.90561	1328.93	1185.83	1290.13	0.211182	Middle Brigantian (Visean) fossil assemblages, Waters, C., Browne, M., Jones, N., Somerville, I., 2011. Midland Valley of Scotland, in: Waters, C. (Ed.), A Revised Correlation of the Carboniferous Rocks in the British Isles: Geological Society Special Report 26. Geological Society of London, pp. 96-102.				K1-	Pathhead Fife	Scotland	Strathclyde	Pathhead	Upper Adrossan Limestone/ Shale band 1	black shale finely laminated
53710210A	Pathhead Fm, Scotland	332	1301.54	123.19	358.857	54.9643	49.539	73.4038	11.1194	19.334	332	0.23012	0.4675	6.24702	0.5045	0.038	0.036	4.57687	153.897	140.771	140.59	0.755371	Middle Brigantian (Visean) fossil assemblages, Waters, C., Browne, M., Jones, N., Somerville, I., 2011. Midland Valley of Scotland, in: Waters, C. (Ed.), A Revised Correlation of the Carboniferous Rocks in the British Isles: Geological Society Special Report 26. Geological Society of London, pp. 96-102.				K1-	Pathhead Fife	Scotland	Strathclyde	Pathhead	Upper Adrossan Limestone/ Shale band 1	black shale finely laminated
53710210A	Pathhead Fm, Scotland	332	1181.39	144.159	837.112	72.859		102.766	12.4932	17.4626	332	1.24878	0.687	3.70789	0.7415	0.038	0.053	14.9834	243.102	228.593	218.527	0.766135	Middle Brigantian (Visean) fossil assemblages, Waters, C., Browne, M., Jones, N., Somerville, I., 2011. Midland Valley of Scotland, in: Waters, C. (Ed.), A Revised Correlation of the Carboniferous Rocks in the British Isles: Geological Society Special Report 26. Geological Society of London, pp. 96-102.				K1-	Pathhead Fife	Scotland	Strathclyde	Pathhead	Upper Adrossan Limestone/ Shale band 1	black shale finely laminated
53710210A	Pathhead Fm, Scotland	332	2448.84	145.392	371.725	111.004	117.748	107.891	13.5066	21.5214	332	1.23384	5.53686	7.02329	0.5945	0.038	0.0425	4.6221	206.434	183.468	183.242	1.0491
53710210A	Pathhead Fm, Scotland	332	6258.14	90.3231	339.208	79.7688	190.937	117.426	16.428	21.1261	332	0.408863	1.08788	7.25362	0.45	0.038	0.032	2.6089	554.299	498.253	525.756	1.21779	Middle Brigantian (Visean) fossil assemblages, Waters, C., Browne, M., Jones, N., Somerville, I., 2011. Midland Valley of Scotland, in: Waters, C. (Ed.), A Revised Correlation of the Carboniferous Rocks in the British Isles: Geological Society Special Report 26. Geological Society of London, pp. 96-102.				K1-	Pathhead Fife	Scotland	Strathclyde	Pathhead	Upper Adrossan Limestone/ Shale band 1	black shale finely laminated
53710210A	Pathhead Fm, Scotland	332	2172.89	95.7321	190.605	40.6599	273.97	65.6033	17.4649	14.5901	332	1.12946	1.15321	3.72616	0.446	0.038	0.032	2.65073	93.4616	90.6969	86.9931	0.506147	Middle Brigantian (Visean) fossil assemblages, Waters, C., Browne, M., Jones, N., Somerville, I., 2011. Midland Valley of Scotland, in: Waters, C. (Ed.), A Revised Correlation of the Carboniferous Rocks in the British Isles: Geological Society Special Report 26. Geological Society of London, pp. 96-102.				K1-	Pathhead Fife	Scotland	Strathclyde	Pathhead	Upper Adrossan Limestone/ Shale band 1	black shale finely laminated
53710210A	Pathhead Fm, Scotland	332	1012.43	98.2119	408.255	25.2646	96.7849	133.493	21.3533	22.1366	332	0.256128	0.7545	5.0076	0.814	0.038	0.058	4.36945	310.952	276.762	288.802	1.05369	Middle Brigantian (Visean) fossil assemblages, Waters, C., Browne, M., Jones, N., Somerville, I., 2011. Midland Valley of Scotland, in: Waters, C. (Ed.), A Revised Correlation of the Carboniferous Rocks in the British Isles: Geological Society Special Report 26. Geological Society of London, pp. 96-102.				K1-	Pathhead Fife	Scotland	Strathclyde	Pathhead	Upper Adrossan Limestone/ Shale band 1	black shale finely laminated
53710210B	Pathhead Fm, Scotland	332	1254.16	44.5666	87.4139	19.8508	31.9231	96.1509	1.1335	6.17172	332	0.177963	0.509834	1.57016	0.135	0.038	0.0095	0.627347	41.7845	36.1953	38.1911	0.11871	Earliest Chesterian (Middle Mississippian) foraminfera assemblages, Smith, D.L., Gilmour, E.H., 1979. The Mississippian and Pennsylvanian (Carboniferous) systems in the United States - Montana, U.S. Geological Survey Professional Paper 1110-X, pp. X1-X32, Derkey, P.D., Abercrombie, F.N., Vuke, S.M., Daniel, J.A., 1985. Geology and oil shale resources of the Heath Formation, Fergus County, Montana…		HP8-391.8: Non-calcareous mudstone with minor disseminated dolomite(?) and locally abundant flat clams, rare phosphatic clasts/shell fragments. Probably dysoxic marine setting. Large pyrite lens but also abundant disseminated pyrite. (from Karen Kelley)		J5-	Cox Ranch drill hole, Big Snowy Trough, Fergus County, Montana	USA	Big Snowy	Heath	Forestgrove (oil shale unit)	black shale with Py2 veins
53710210B	Pathhead Fm, Scotland	332	820.705	75.5274	714.051	90.3972	672.869	208.027	1.43491	15.1477	332	1.97716	2.98783	6.72002	0.0840336	0.038	0.029617	10.686	125.686	109.968	116.222	0.756815	Earliest Chesterian (Middle Mississippian) foraminfera assemblages, Smith, D.L., Gilmour, E.H., 1979. The Mississippian and Pennsylvanian (Carboniferous) systems in the United States - Montana, U.S. Geological Survey Professional Paper 1110-X, pp. X1-X32, Derkey, P.D., Abercrombie, F.N., Vuke, S.M., Daniel, J.A., 1985. Geology and oil shale resources of the Heath Formation, Fergus County, Montana…		HP4-234: Pyrite is largely disseminated in shale/mudstone or as larger lenses. We have QEMSCAN and SEM data on this. Ni contents are elevated in pyrite. Abundant sphalerite is also in this sample. There are both euhedral and framboidal pyrites in the matrix (sphalerite EG1502commonly overgrows fram py, which are small). (from Karen Kelley)		J5-	Red Hill drill hole, Big Snowy Trough, Fergus County, Montana	USA	Big Snowy	Heath	Forestgrove (oil shale unit)	black shale with Py2 cubic crystals pyrite nodule and trace fine framboids
53710210B	Pathhead Fm, Scotland	332	2612.64	92.8764	211.011	31.6179	302.68	430.468	3.7075	5.42147	332	0.369787	1.08849	3.73082	0.4485	0.038	0.032	2.71048	110.346	112.831	108.992	0.663842	Earliest Chesterian (Middle Mississippian) foraminfera assemblages, Smith, D.L., Gilmour, E.H., 1979. The Mississippian and Pennsylvanian (Carboniferous) systems in the United States - Montana, U.S. Geological Survey Professional Paper 1110-X, pp. X1-X32, Derkey, P.D., Abercrombie, F.N., Vuke, S.M., Daniel, J.A., 1985. Geology and oil shale resources of the Heath Formation, Fergus County, Montana…		HP8-162: dark to medium-gray mudstone with layers/lenses of fine grained mudstone. Pyrite layer is within skeletal wackestone, and on either side of pyrite layer, pyrite becomes more disseminated. (from Karen Kelley)		J5-	Cox Ranch drill hole, Big Snowy Trough, Fergus County, Montana	USA	Big Snowy	Heath	Forestgrove (oil shale unit)	black shale with Py2 pyrite nodule
53710210B	Pathhead Fm, Scotland	332	1168.9	147.067	242.408	45.2103	32.241	163.405	5.46072	11.9453	332	0.201076	0.809498	2.70765	0.1245	0.038	0.0085	2.34909	92.2492	82.1108	86.0263	0.144533	Earliest Chesterian (Middle Mississippian) foraminfera assemblages, Smith, D.L., Gilmour, E.H., 1979. The Mississippian and Pennsylvanian (Carboniferous) systems in the United States - Montana, U.S. Geological Survey Professional Paper 1110-X, pp. X1-X32, Derkey, P.D., Abercrombie, F.N., Vuke, S.M., Daniel, J.A., 1985. Geology and oil shale resources of the Heath Formation, Fergus County, Montana…		HP4-234: Pyrite is largely disseminated in shale/mudstone or as larger lenses. We have QEMSCAN and SEM data on this. Ni contents are elevated in pyrite. Abundant sphalerite is also in this sample. There are both euhedral and framboidal pyrites in the matrix (sphalerite EG1502commonly overgrows fram py, which are small). (from Karen Kelley)		J5-	Red Hill drill hole, Big Snowy Trough, Fergus County, Montana	USA	Big Snowy	Heath	Forestgrove (oil shale unit)	black shale with Py2 cubic crystals pyrite nodule and trace fine framboids
53710210B	Pathhead Fm, Scotland	332	2596.31	144.616	389.309	60.5045	164.815	73.8599	6.03247	42.4651	332	0.199631	0.237471	8.33047	0.1285	0.038	0.009	1.00576	139.284	123.873	129.766	0.272256	Earliest Chesterian (Middle Mississippian) foraminfera assemblages, Smith, D.L., Gilmour, E.H., 1979. The Mississippian and Pennsylvanian (Carboniferous) systems in the United States - Montana, U.S. Geological Survey Professional Paper 1110-X, pp. X1-X32, Derkey, P.D., Abercrombie, F.N., Vuke, S.M., Daniel, J.A., 1985. Geology and oil shale resources of the Heath Formation, Fergus County, Montana…		HP8-162: dark to medium-gray mudstone with layers/lenses of fine grained mudstone. Pyrite layer is within skeletal wackestone, and on either side of pyrite layer, pyrite becomes more disseminated. (from Karen Kelley)		J5-	Cox Ranch drill hole, Big Snowy Trough, Fergus County, Montana	USA	Big Snowy	Heath	Forestgrove (oil shale unit)	black shale with Py2 pyrite nodule
53710210B	Pathhead Fm, Scotland	332	1243.56	83.0284	216.842	80.6129	457.008	78.9164	11.5088	5.75427	332	0.59741	1.18741	3.94352	0.322	0.038	0.023	3.59164	113.572	104.744	110.122	1.0196	Earliest Chesterian (Middle Mississippian) foraminfera assemblages, Smith, D.L., Gilmour, E.H., 1979. The Mississippian and Pennsylvanian (Carboniferous) systems in the United States - Montana, U.S. Geological Survey Professional Paper 1110-X, pp. X1-X32, Derkey, P.D., Abercrombie, F.N., Vuke, S.M., Daniel, J.A., 1985. Geology and oil shale resources of the Heath Formation, Fergus County, Montana…		HP8-162: dark to medium-gray mudstone with layers/lenses of fine grained mudstone. Pyrite layer is within skeletal wackestone, and on either side of pyrite layer, pyrite becomes more disseminated. (from Karen Kelley)		J5-	Cox Ranch drill hole, Big Snowy Trough, Fergus County, Montana	USA	Big Snowy	Heath	Forestgrove (oil shale unit)	black shale with Py2 pyrite nodule
53710210B	Pathhead Fm, Scotland	332	3.85891	100.229	136.177	11.1753	5.85402	14.9608	11.6452	0.677927	332	0.0435611	0.0855	0.522111	0.124	0.038	0.0085	0.626817	33.8453	29.9236	31.6117	0.129672	Earliest Chesterian (Middle Mississippian) foraminfera assemblages, Smith, D.L., Gilmour, E.H., 1979. The Mississippian and Pennsylvanian (Carboniferous) systems in the United States - Montana, U.S. Geological Survey Professional Paper 1110-X, pp. X1-X32, Derkey, P.D., Abercrombie, F.N., Vuke, S.M., Daniel, J.A., 1985. Geology and oil shale resources of the Heath Formation, Fergus County, Montana…		HP4-234: Pyrite is largely disseminated in shale/mudstone or as larger lenses. We have QEMSCAN and SEM data on this. Ni contents are elevated in pyrite. Abundant sphalerite is also in this sample. There are both euhedral and framboidal pyrites in the matrix (sphalerite EG1502commonly overgrows fram py, which are small). (from Karen Kelley)		J5-	Red Hill drill hole, Big Snowy Trough, Fergus County, Montana	USA	Big Snowy	Heath	Forestgrove (oil shale unit)	black shale with Py2 cubic crystals pyrite nodule and trace fine framboids
53710210B	Pathhead Fm, Scotland	332	10.7197	72.1238	106.673	12.9186	6.76522	10.5797	12.2378	0.51278	332	0.0354258	0.0845	0.409335	0.1225	0.038	0.0085	0.469906	22.0784	19.183	20.5085	0.109765	Earliest Chesterian (Middle Mississippian) foraminfera assemblages, Smith, D.L., Gilmour, E.H., 1979. The Mississippian and Pennsylvanian (Carboniferous) systems in the United States - Montana, U.S. Geological Survey Professional Paper 1110-X, pp. X1-X32, Derkey, P.D., Abercrombie, F.N., Vuke, S.M., Daniel, J.A., 1985. Geology and oil shale resources of the Heath Formation, Fergus County, Montana…		HP4-234: Pyrite is largely disseminated in shale/mudstone or as larger lenses. We have QEMSCAN and SEM data on this. Ni contents are elevated in pyrite. Abundant sphalerite is also in this sample. There are both euhedral and framboidal pyrites in the matrix (sphalerite EG1502commonly overgrows fram py, which are small). (from Karen Kelley)		J5-	Red Hill drill hole, Big Snowy Trough, Fergus County, Montana	USA	Big Snowy	Heath	Forestgrove (oil shale unit)	black shale with Py2 cubic crystals pyrite nodule and trace fine framboids
53710210B	Pathhead Fm, Scotland	332	1617.24	177.574	446.879	83.1607	343.885	126.477	13.496	10.8662	332	0.627332	1.30888	5.60649	0.6255	0.038	0.0445	5.34843	215.302	194.382	205.542	1.3258	Earliest Chesterian (Middle Mississippian) foraminfera assemblages, Smith, D.L., Gilmour, E.H., 1979. The Mississippian and Pennsylvanian (Carboniferous) systems in the United States - Montana, U.S. Geological Survey Professional Paper 1110-X, pp. X1-X32, Derkey, P.D., Abercrombie, F.N., Vuke, S.M., Daniel, J.A., 1985. Geology and oil shale resources of the Heath Formation, Fergus County, Montana…		HP4-234: Pyrite is largely disseminated in shale/mudstone or as larger lenses. We have QEMSCAN and SEM data on this. Ni contents are elevated in pyrite. Abundant sphalerite is also in this sample. There are both euhedral and framboidal pyrites in the matrix (sphalerite EG1502commonly overgrows fram py, which are small). (from Karen Kelley)		J5-	Red Hill drill hole, Big Snowy Trough, Fergus County, Montana	USA	Big Snowy	Heath	Forestgrove (oil shale unit)	black shale with Py2 cubic crystals pyrite nodule and trace fine framboids
53710210B	Pathhead Fm, Scotland	332	1694.24	146.887	372.104	95.7188	442.151	106.997	13.5791	8.52543	332	0.503728	0.477	5.28027	0.5145	0.038	0.037	2.94328	190.539	178.95	183.384	1.47525	Earliest Chesterian (Middle Mississippian) foraminfera assemblages, Smith, D.L., Gilmour, E.H., 1979. The Mississippian and Pennsylvanian (Carboniferous) systems in the United States - Montana, U.S. Geological Survey Professional Paper 1110-X, pp. X1-X32, Derkey, P.D., Abercrombie, F.N., Vuke, S.M., Daniel, J.A., 1985. Geology and oil shale resources of the Heath Formation, Fergus County, Montana…		HP8-162: dark to medium-gray mudstone with layers/lenses of fine grained mudstone. Pyrite layer is within skeletal wackestone, and on either side of pyrite layer, pyrite becomes more disseminated. (from Karen Kelley)		J5-	Cox Ranch drill hole, Big Snowy Trough, Fergus County, Montana	USA	Big Snowy	Heath	Forestgrove (oil shale unit)	black shale with Py2 pyrite nodule
53710210B	Pathhead Fm, Scotland	332	3239.12	25.6515	65.0868	48.5189	201.799	81.8119	14.828	10.123	332	0.354437	0.372	2.83298	0.401	0.038	0.0285	1.40917	113.969	100.471	108.759	0.337609	Earliest Chesterian (Middle Mississippian) foraminfera assemblages, Smith, D.L., Gilmour, E.H., 1979. The Mississippian and Pennsylvanian (Carboniferous) systems in the United States - Montana, U.S. Geological Survey Professional Paper 1110-X, pp. X1-X32, Derkey, P.D., Abercrombie, F.N., Vuke, S.M., Daniel, J.A., 1985. Geology and oil shale resources of the Heath Formation, Fergus County, Montana…		HP8-391.8: Non-calcareous mudstone with minor disseminated dolomite(?) and locally abundant flat clams, rare phosphatic clasts/shell fragments. Probably dysoxic marine setting. Large pyrite lens but also abundant disseminated pyrite. (from Karen Kelley)		J5-	Cox Ranch drill hole, Big Snowy Trough, Fergus County, Montana	USA	Big Snowy	Heath	Forestgrove (oil shale unit)	black shale with Py2 veins
53710210B	Pathhead Fm, Scotland	332	14.3231	88.2213	135.901	22.7523	8.45273	15.7522	15.4959	0.644798	332	0.0969014	0.0855	0.774559	0.124	0.038	0.0085	0.533279	36.1022	32.0673	33.5527	0.143762	Earliest Chesterian (Middle Mississippian) foraminfera assemblages, Smith, D.L., Gilmour, E.H., 1979. The Mississippian and Pennsylvanian (Carboniferous) systems in the United States - Montana, U.S. Geological Survey Professional Paper 1110-X, pp. X1-X32, Derkey, P.D., Abercrombie, F.N., Vuke, S.M., Daniel, J.A., 1985. Geology and oil shale resources of the Heath Formation, Fergus County, Montana…		HP4-234: Pyrite is largely disseminated in shale/mudstone or as larger lenses. We have QEMSCAN and SEM data on this. Ni contents are elevated in pyrite. Abundant sphalerite is also in this sample. There are both euhedral and framboidal pyrites in the matrix (sphalerite EG1502commonly overgrows fram py, which are small). (from Karen Kelley)		J5-	Red Hill drill hole, Big Snowy Trough, Fergus County, Montana	USA	Big Snowy	Heath	Forestgrove (oil shale unit)	black shale with Py2 cubic crystals pyrite nodule and trace fine framboids
53710210B	Pathhead Fm, Scotland	332	2797.14	151.799	346.604	84.0129	427.532	218.796	17.5627	6.38343	332	0.504808	1.80131	4.47427	0.526	0.038	0.0375	2.6162	157.222	143.368	150.624	0.817165	Earliest Chesterian (Middle Mississippian) foraminfera assemblages, Smith, D.L., Gilmour, E.H., 1979. The Mississippian and Pennsylvanian (Carboniferous) systems in the United States - Montana, U.S. Geological Survey Professional Paper 1110-X, pp. X1-X32, Derkey, P.D., Abercrombie, F.N., Vuke, S.M., Daniel, J.A., 1985. Geology and oil shale resources of the Heath Formation, Fergus County, Montana…		HP8-162: dark to medium-gray mudstone with layers/lenses of fine grained mudstone. Pyrite layer is within skeletal wackestone, and on either side of pyrite layer, pyrite becomes more disseminated. (from Karen Kelley)		J5-	Cox Ranch drill hole, Big Snowy Trough, Fergus County, Montana	USA	Big Snowy	Heath	Forestgrove (oil shale unit)	black shale with Py2 pyrite nodule
53710210B	Pathhead Fm, Scotland	332	6573.39	89.086	386.54	87.7683	597.748	184.945	19.331	27.3998	332	1.48223	1.61381	7.34041	0.609	0.038	0.0435	3.63296	489.223	515.324	434.806	1.56017	Earliest Chesterian (Middle Mississippian) foraminfera assemblages, Smith, D.L., Gilmour, E.H., 1979. The Mississippian and Pennsylvanian (Carboniferous) systems in the United States - Montana, U.S. Geological Survey Professional Paper 1110-X, pp. X1-X32, Derkey, P.D., Abercrombie, F.N., Vuke, S.M., Daniel, J.A., 1985. Geology and oil shale resources of the Heath Formation, Fergus County, Montana…		HP8-162: dark to medium-gray mudstone with layers/lenses of fine grained mudstone. Pyrite layer is within skeletal wackestone, and on either side of pyrite layer, pyrite becomes more disseminated. (from Karen Kelley)		J5-	Cox Ranch drill hole, Big Snowy Trough, Fergus County, Montana	USA	Big Snowy	Heath	Forestgrove (oil shale unit)	black shale with Py2 pyrite nodule
53710210B	Pathhead Fm, Scotland	332	6682.82	131.659	278.883	71.1531	793.405	74.5685	21.3814	11.4059	332	0.468883	2.4463	5.47468	0.411	0.038	0.0295	2.80112	157.37	126.448	128.552	0.980619	Earliest Chesterian (Middle Mississippian) foraminfera assemblages, Smith, D.L., Gilmour, E.H., 1979. The Mississippian and Pennsylvanian (Carboniferous) systems in the United States - Montana, U.S. Geological Survey Professional Paper 1110-X, pp. X1-X32, Derkey, P.D., Abercrombie, F.N., Vuke, S.M., Daniel, J.A., 1985. Geology and oil shale resources of the Heath Formation, Fergus County, Montana…		HP8-162: dark to medium-gray mudstone with layers/lenses of fine grained mudstone. Pyrite layer is within skeletal wackestone, and on either side of pyrite layer, pyrite becomes more disseminated. (from Karen Kelley)		J5-	Cox Ranch drill hole, Big Snowy Trough, Fergus County, Montana	USA	Big Snowy	Heath	Forestgrove (oil shale unit)	black shale with Py2 pyrite nodule
[truncated: 3,563 more rows]

## Sheet: G47890
Mukherjee, I., and Large, R.R., 2020, Co-evolution of trace elements and life in Precambrian oceans: The pyrite edition: Geology, v. 48, https://doi.org/10.1130/G47890.1
